# Supplementary material for: Transition-metal-free, mild and efficient ring expansion of amino acid derivatives: facile access to densely functionalized azepines
Source: Royal Society of Chemistry journal article supplement (doi:10.1039/d2qo01147f), 2022-01-01

**Supplementary Information for**  
**Transition-metal-free, mild and efficient ring expansion of**  
**amino acid derivatives: facile access to densely functionalized**  
**azepines**

Xingjie Zhang,\* Xue Wang, Chenchen Jiao, Jie Zhao, Xiaopan Liu, and Guisheng Zhang\*

*Key Laboratory of Green Chemical Media and Reactions, Ministry of Education,  
Collaborative Innovation Center of Henan Province for Green Manufacturing of Fine  
Chemicals, Henan Key Laboratory of Organic Functional Molecules and Drug Innovation,  
NMPA Key Laboratory for Research and Evaluation of Innovative Drug, School of  
Chemistry and Chemical Engineering, Henan Normal University  
46 East of Construction Road, Xinxiang, Henan 453007 (China)  
E-mail: zhangxingjie@htu.edu.cn; zgs@htu.cn*

## Contents

|                                                                    |          |
|--------------------------------------------------------------------|----------|
| General information                                                | S3       |
| Optimization studies                                               | S4-S5    |
| General procedure for the synthesis of pyridinium salts            | S6-S22   |
| General procedure for the ring expansion of amino acid derivatives | S22-S45  |
| Gram scale study                                                   | S45-S46  |
| One-pot transformation                                             | S46-S47  |
| Bioactivity testing for selected azepine derivatives               | S47-S50  |
| Radical trap experiment                                            | S50-S51  |
| Radical clock experiment                                           | S51-S52  |
| X-ray diffraction data of <b>2n</b>                                | S52-S53  |
| References                                                         | S54      |
| NMR spectra of all new compounds                                   | S55-S136 |

## General information

Unless otherwise noted, commercially available reagents were used as received without further purification and all reactions were carried out using standard Schlenk technique under nitrogen atmosphere. Tetrahydrofuran (THF), dichloromethane (DCM), dimethyl sulfoxide (DMSO), and acetonitrile (CH<sub>3</sub>CN) were dried using Eminex Solvent Purifier (EX-SPS5-800). Anhydrous dimethylformamide (DMF), dimethylacetamide (DMA), 1,2-dimethoxyethane (DME), and 1,4-dioxane were purchased from J&K Chemical Company. Anhydrous K<sub>3</sub>PO<sub>4</sub> was purchased from Acros. Anhydrous K<sub>2</sub>CO<sub>3</sub> was purchased from Kelong Chemical Company. Flash column chromatography was performed on silica gel (200-300 mesh). <sup>1</sup>H and <sup>13</sup>C NMR spectra were recorded on Bruker 400 MHz and 600 MHz spectrometers at room temperature in CDCl<sub>3</sub> (containing 0.03% TMS) solution. <sup>1</sup>H NMR spectra was recorded with tetramethylsilane (0.00 ppm) or solvent residual peak (CDCl<sub>3</sub>: 7.26 ppm) as internal reference; <sup>13</sup>C NMR spectra was recorded with CDCl<sub>3</sub> (77.00 ppm) as internal reference. Data are represented as follows: chemical shift, multiplicity (br = broad, s = singlet, d = doublet, t = triplet, q = quartet, dd = doublet of doublets, m = multiplet), coupling constants (Hz) and integration. High-resolution mass spectra were obtained by using Bruker UHR-ES-TOF MS. The IR spectra were measured on a PerkinElmer Spectrum 400 FT-IR/FT-FIR spectrometer. Single crystal X-ray diffraction data was collected at 293 K for complex **2n** on a SuperNova diffractometer. The corresponding pyridinium salts used in this work were prepared according to literature procedures.<sup>1</sup>

## Optimization studies

**Table S1.** Effect of base<sup>a</sup>

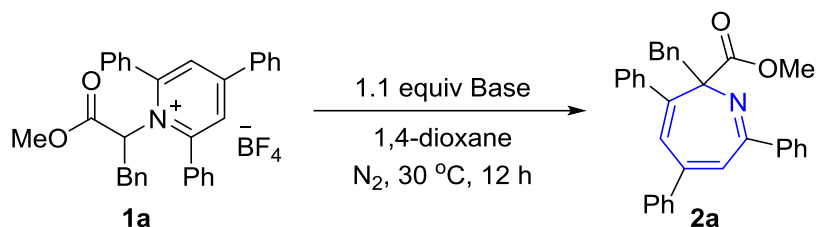

| Entry | Base                            | Yield <sup>b</sup> (%) |
|-------|---------------------------------|------------------------|
| 1     | K <sub>2</sub> CO <sub>3</sub>  | 99 (98) <sup>c</sup>   |
| 2     | K <sub>3</sub> PO <sub>4</sub>  | 92                     |
| 3     | KO <sup>t</sup> Bu              | 78                     |
| 4     | Cs <sub>2</sub> CO <sub>3</sub> | 89                     |
| 5     | RbCO <sub>3</sub>               | 90                     |
| 6     | NaOEt                           | 78                     |
| 7     | Et <sub>3</sub> N               | 0                      |
| 8     | DBU                             | 76                     |

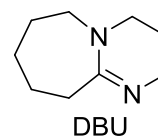

<sup>a</sup> Conditions: **1a** (0.3 mmol, 167.2 mg), base (0.33 mmol), 1,4-dioxane (3.0 mL), 30 °C, 12 h, in a sealed tube, under N<sub>2</sub> atmosphere. <sup>b</sup> NMR yields with 1,3,5-trimethoxybenzene as an internal standard. <sup>c</sup> Isolated yield.

**Table S2.** Effect of solvent<sup>a</sup>

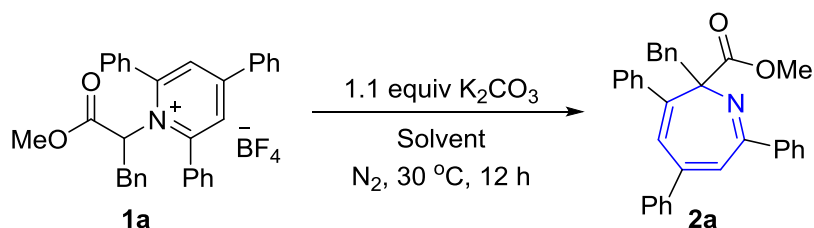

| Entry | Solvent     | Yield <sup>b</sup> (%) |
|-------|-------------|------------------------|
| 1     | 1,4-dioxane | 99 (98) <sup>c</sup>   |
| 2     | THF         | 93                     |
| 3     | DME         | 89                     |
| 4     | DMF         | 80                     |
| 5     | DMA         | 93                     |
| 6     | DMSO        | 86                     |
| 7     | MeCN        | 26                     |
| 8     | DCM         | 27                     |

<sup>a</sup> Conditions: **1a** (0.3 mmol, 167.2 mg), K<sub>2</sub>CO<sub>3</sub> (0.33 mmol, 45.6 mg), solvent (3.0 mL), 30 °C, 12 h, in a sealed tube, under N<sub>2</sub> atmosphere. <sup>b</sup> NMR yields with 1,3,5-trimethoxybenzene as an internal standard. <sup>c</sup> Isolated yield.

**Table S3.** Effect of other parameter<sup>a</sup>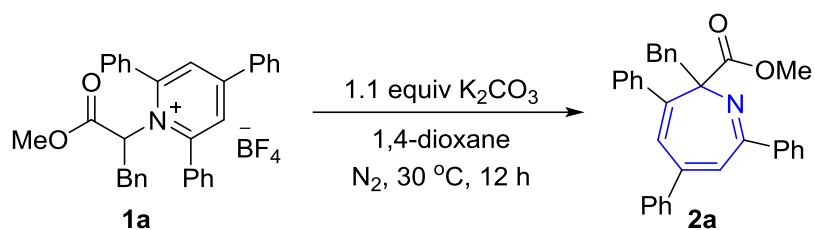

| Entry | Variations                        | Yield <sup>b</sup> (%) |
|-------|-----------------------------------|------------------------|
| 1     | No K <sub>2</sub> CO <sub>3</sub> | 0                      |
| 2     | In the dark                       | 95                     |
| 3     | In air                            | 80                     |
| 4     | 2.0 equiv H <sub>2</sub> O added  | 96                     |

<sup>a</sup> Conditions: **1a** (0.3 mmol, 167.2 mg), K<sub>2</sub>CO<sub>3</sub> (0.33 mmol, 45.6 mg), 1,4-dioxane (3.0 mL), 30 °C, 12 h, in a sealed tube, under N<sub>2</sub> atmosphere. <sup>b</sup> NMR yields with 1,3,5-trimethoxybenzene as an internal standard.

**Table S4.** For all known pyridinium salts used in this work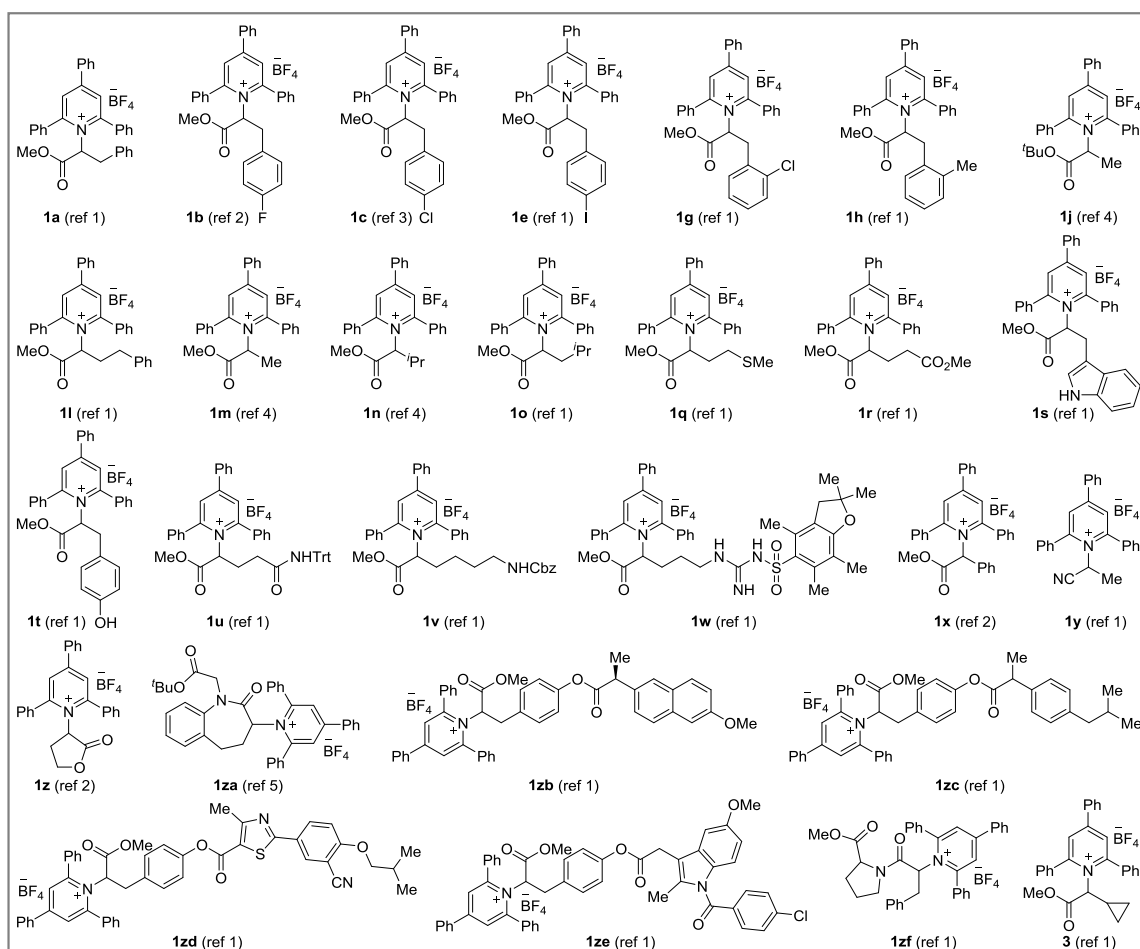

## General procedure for the synthesis of pyridinium salts

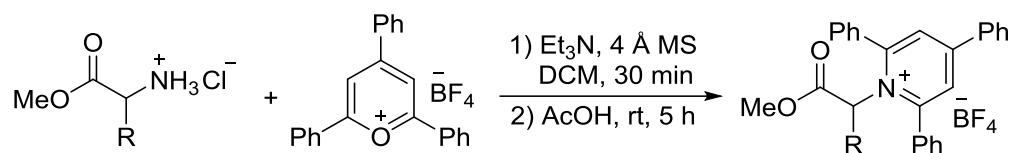

According to the previous reported procedure,<sup>1</sup> amino acid methyl ester (1.0 equiv), crushed 4 Å MS (0.5 g/mmol), 2,4,6-triphenylpyrylium tetrafluoroborate (1.0 equiv), dichloromethane (0.5 M with respect to amino acid methyl ester), and Et<sub>3</sub>N (2.0 equiv) were added to a round-bottomed flask fitted with a stir bar, sequentially. After stirring at room temperature for 30 min, acetic acid (2.0 equiv) was added via syringe. The reaction mixture was stirred at room temperature for an additional 5 h. Then, the resulting mixture was filtered through a short pad of celite and rinsed with dichloromethane. The filtrate was washed with aqueous HCl (1 M), saturated aqueous NaHCO<sub>3</sub>, water, and brine, and dried over anhydrous Na<sub>2</sub>SO<sub>4</sub>. Then, the organic layer was filtered, and concentrated under the reduced pressure. The residue was purified by column chromatography on silica gel to afford the target pyridinium salt product.

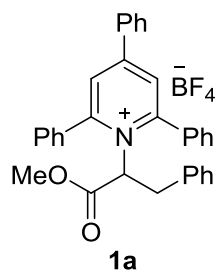

### 1-(1-Methoxy-1-oxo-3-phenylpropan-2-yl)-2,4,6-triphenylpyridin-1-ium

**tetrafluoroborate (1a).** <sup>1</sup>H NMR (400 MHz, CDCl<sub>3</sub>): δ 7.92 (s, 2H), 7.83-7.79 (m, 4H), 7.62-7.44 (m, 11H), 7.13-7.05 (m, 3H), 6.76 (d, *J* = 6.8 Hz, 2H), 5.64 (dd, *J* = 4.4, 7.6 Hz, 1H), 3.70 (s, 3H), 3.43 (dd, *J* = 4.4, 14.4 Hz, 1H), 2.95 (dd, *J* = 7.6, 14.4 Hz, 1H). <sup>13</sup>C NMR (100 MHz, CDCl<sub>3</sub>): δ 167.7, 156.89, 156.85, 136.1, 133.6, 132.4, 132.1, 131.5, 129.6, 129.5, 129.0, 128.9, 128.6, 128.5, 127.7, 127.2, 70.1, 53.7, 37.6. The spectroscopic data are in agreement with that previously reported.<sup>1</sup>

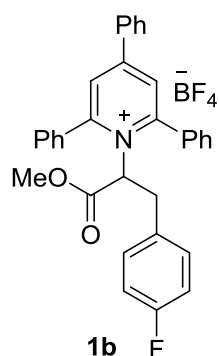

**1-(3-(4-Fluorophenyl)-1-methoxy-1-oxopropan-2-yl)-2,4,6-triphenylpyridin-1-ium**

**tetrafluoroborate (1b).**  $^1\text{H}$  NMR (600 MHz,  $\text{CDCl}_3$ ):  $\delta$  7.91 (s, 2H), 7.81-7.80 (m, 4H), 7.61-7.47 (m, 11H), 6.81-6.73 (m, 4H), 5.57 (dd,  $J = 3.6, 8.4$  Hz, 1H), 3.70 (s, 3H), 3.43 (dd,  $J = 3.0, 14.4$  Hz, 1H), 2.91 (dd,  $J = 8.4, 14.4$  Hz, 1H).  $^{13}\text{C}$  NMR (150 MHz,  $\text{CDCl}_3$ ):  $\delta$  167.6, 161.7 (d,  $J = 243.9$  Hz), 156.9, 156.7, 133.6, 132.3, 132.2 (d,  $J = 3.3$  Hz), 132.1, 131.5, 130.6 (d,  $J = 7.7$  Hz), 129.6, 129.2, 129.0, 128.4, 127.7, 115.2 (d,  $J = 20.7$  Hz), 69.9, 53.7, 36.8. The spectroscopic data are in agreement with that previously reported.<sup>2</sup>

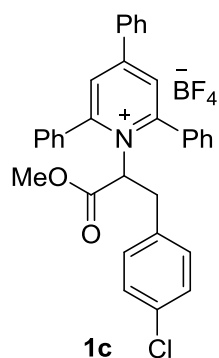

**1-(3-(4-Chlorophenyl)-1-methoxy-1-oxopropan-2-yl)-2,4,6-triphenylpyridin-1-ium**

**tetrafluoroborate (1c).**  $^1\text{H}$  NMR (400 MHz,  $\text{CDCl}_3$ ):  $\delta$  7.92 (s, 2H), 7.82-7.80 (m, 4H), 7.62-7.46 (m, 11H), 7.02 (d,  $J = 8.0$  Hz, 2H), 6.75 (d,  $J = 8.4$  Hz, 2H), 5.57 (dd,  $J = 2.8, 8.4$  Hz, 1H), 3.69 (s, 3H), 3.47 (dd,  $J = 2.4, 14.4$  Hz, 1H), 2.86 (dd,  $J = 8.8, 14.4$  Hz, 1H).  $^{13}\text{C}$  NMR (100 MHz,  $\text{CDCl}_3$ ):  $\delta$  167.6, 157.0, 156.6, 135.2, 133.7, 132.9, 132.3, 132.2, 131.5, 130.4, 129.6, 129.3, 129.1, 128.5, 128.4, 127.8, 69.8, 53.7, 37.1. The spectroscopic data are in agreement with that previously reported.<sup>3</sup>

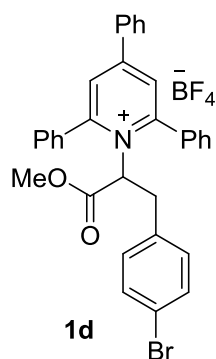

**1-(3-(4-Bromophenyl)-1-methoxy-1-oxopropan-2-yl)-2,4,6-triphenylpyridin-1-ium tetrafluoroborate (1d).** 10.0 mmol scale, purification of the crude product by column chromatography on silica gel (eluent: petroleum ether: ethyl acetate = 5:1 to dichloromethane: acetone = 10:1, gradient) afforded the title product in 38% yield (2.42 g) as a light-red solid. M.p. = 131-132 °C. <sup>1</sup>H NMR (400 MHz, CDCl<sub>3</sub>): δ 7.95 (s, 2H), 7.84-7.70 (m, 4H), 7.63-7.49 (m, 11H), 7.18 (d, *J* = 8.4 Hz, 2H), 6.70 (d, *J* = 8.4 Hz, 2H), 5.57 (dd, *J* = 8.4, 2.4 Hz, 1H), 3.68 (s, 3H), 3.51 (dd, *J* = 14.4, 2.4 Hz, 1H), 2.82 (dd, *J* = 14.4, 8.8 Hz, 1H). <sup>13</sup>C NMR (150 MHz, CDCl<sub>3</sub>): δ 167.3, 156.8, 156.5, 135.5, 133.5, 132.2, 132.0, 131.4, 131.3, 130.7, 129.5, 129.1, 129.0, 128.3, 127.6, 120.9, 69.5, 53.7, 37.0. <sup>19</sup>F NMR (565 MHz, CDCl<sub>3</sub>): δ -152.52, -152.57. IR (neat): 3061, 2957, 1749, 1618, 1596, 1557, 1491, 1229, 1050, 1011, 886, 764, 702 cm<sup>-1</sup>. HRMS (ESI) calcd. for C<sub>33</sub>H<sub>27</sub>BrNO<sub>2</sub> [M-BF<sub>4</sub>]<sup>+</sup>: 548.1220, found 548.1221.

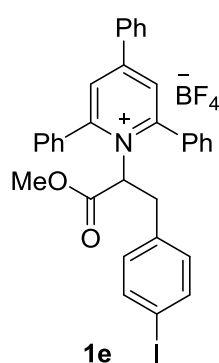

**1-(3-(4-Iodophenyl)-1-methoxy-1-oxopropan-2-yl)-2,4,6-triphenylpyridin-1-ium tetrafluoroborate (1e).** <sup>1</sup>H NMR (400 MHz, CDCl<sub>3</sub>): δ 7.92 (s, 2H), 7.82-7.74 (m, 4H), 7.61-7.46 (m, 11H), 7.37 (d, *J* = 8.4 Hz, 2H), 6.55 (d, *J* = 8.0 Hz, 2H), 5.57 (dd, *J* = 2.8, 8.4 Hz, 1H), 3.68 (s, 3H), 3.45 (dd, *J* = 2.8, 14.4 Hz, 1H), 2.83 (dd, *J* = 8.4, 14.0 Hz, 1H). <sup>13</sup>C NMR (100 MHz, CDCl<sub>3</sub>): δ 167.6, 157.0, 156.6, 137.4, 136.4, 133.7, 132.3, 132.2,



131.5, 131.0, 129.6, 129.3, 129.1, 128.5, 127.8, 92.6, 69.7, 53.8, 37.2. The spectroscopic data are in agreement with that previously reported.<sup>1</sup>

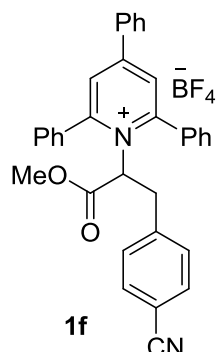

**1-(3-(4-Cyanophenyl)-1-methoxy-1-oxopropan-2-yl)-2,4,6-triphenylpyridin-1-ium tetrafluoroborate (1f).** 6.0 mmol scale, purification of the crude product by column chromatography on silica gel (eluent: petroleum ether: ethyl acetate = 5:1 to dichloromethane: acetone = 10:1, gradient) afforded the title product in 54% yield (1.89 g) as a light-red solid. M.p. = 130-131 °C. <sup>1</sup>H NMR (600 MHz, CDCl<sub>3</sub>): δ 7.93 (d, *J* = 4.2 Hz, 2H), 7.81-7.80 (m, 4H), 7.62-7.47 (m, 11H), 7.34 (dd, *J* = 8.4, 1.2 Hz, 2H), 6.98 (d, *J* = 7.2 Hz, 2H), 5.56 (dd, *J* = 8.4, 1.2 Hz, 1H), 3.70 (s, 3H), 3.63 (dd, *J* = 13.8, 4.2 Hz, 1H), 2.94-2.90 (m, 1H). <sup>13</sup>C NMR (150 MHz, CDCl<sub>3</sub>): δ 167.5, 157.1, 156.5, 142.4, 133.6, 132.4, 132.1, 131.6, 129.9, 129.6, 129.2, 129.1, 128.4, 127.8, 118.5, 110.8, 69.2, 53.9, 37.7 (*1 aromatic carbon signal is not observed due to signal overlap*). <sup>19</sup>F NMR (565 MHz, CDCl<sub>3</sub>): δ -152.30, -152.35. IR (neat): 3065, 2957, 2226, 1745, 1618, 1559, 1231, 1050, 999, 889, 763, 703 cm<sup>-1</sup>. HRMS (ESI) calcd. for C<sub>34</sub>H<sub>27</sub>N<sub>2</sub>O<sub>2</sub> [M-BF<sub>4</sub>]<sup>+</sup>: 495.2067, found 495.2067.

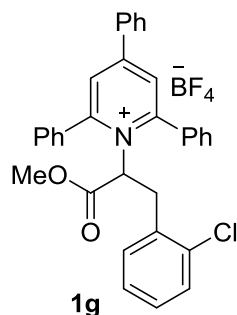

**1-(3-(2-Chlorophenyl)-1-methoxy-1-oxopropan-2-yl)-2,4,6-triphenylpyridin-1-ium**

**tetrafluoroborate (1g).**  $^1\text{H}$  NMR (600 MHz,  $\text{CDCl}_3$ ):  $\delta$  7.94 (s, 2H), 7.88-7.86 (m, 3H), 7.63-7.61 (m, 4H), 7.57-7.51 (m, 7H), 7.18-7.16 (m, 2H), 7.10-7.08 (m, 2H), 6.83 (d,  $J$  = 7.2 Hz, 1H), 5.88 (dd,  $J$  = 4.8, 8.4 Hz, 1H), 3.76 (s, 3H), 3.41 (dd,  $J$  = 4.8, 15.0 Hz, 1H), 3.26 (dd,  $J$  = 8.4, 15.0 Hz, 1H).  $^{13}\text{C}$  NMR (150 MHz,  $\text{CDCl}_3$ ):  $\delta$  167.3, 157.4, 157.1, 134.2, 133.2, 132.7, 132.3, 131.9, 131.7, 130.7, 129.75, 129.68, 129.4, 129.3, 129.2, 128.6, 127.8, 68.1, 54.0, 34.7. The spectroscopic data are in agreement with that previously reported.<sup>1</sup>

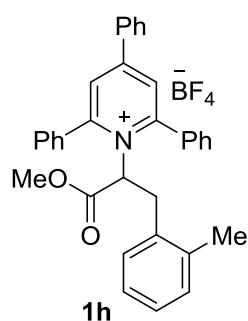

**1-(1-Methoxy-1-oxo-3-(*o*-tolyl)propan-2-yl)-2,4,6-triphenylpyridin-1-ium**

**tetrafluoroborate (1h).**  $^1\text{H}$  NMR (400 MHz,  $\text{CDCl}_3$ ):  $\delta$  7.93 (s, 2H), 7.86-7.80 (m, 3H), 7.64-7.49 (m, 10H), 7.40-7.17 (m, 2H), 7.07 (t,  $J$  = 7.6 Hz, 1H), 6.98 (d,  $J$  = 7.2 Hz, 1H), 6.90 (t,  $J$  = 7.6 Hz, 1H), 6.41 (d,  $J$  = 7.6 Hz, 1H), 5.75 (t,  $J$  = 6.8 Hz, 1H), 3.72 (s, 3H), 3.25-3.15 (m, 2H), 1.74 (s, 3H).  $^{13}\text{C}$  NMR (100 MHz,  $\text{CDCl}_3$ ):  $\delta$  167.4, 157.1, 156.9, 136.8, 133.3, 133.2, 132.6, 132.0, 131.6, 130.8, 129.7, 129.5, 129.1, 128.5, 128.0, 127.7, 127.5, 126.3, 68.7, 53.8, 34.0, 18.7. The spectroscopic data are in agreement with that previously reported.<sup>1</sup>

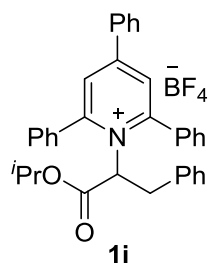

**1-(1-Isopropoxy-1-oxo-3-phenylpropan-2-yl)-2,4,6-triphenylpyridin-1-ium**

**tetrafluoroborate (1i).** 10.0 mmol scale, purification of the crude product by column chromatography on silica gel (eluent: petroleum ether: ethyl acetate = 5:1 to dichloromethane: acetone = 10:1, gradient) afforded the title product in 24% yield (1.43 g)

as a light-red solid. M.p. = 103-104 °C.  $^1\text{H}$  NMR (400 MHz,  $\text{CDCl}_3$ ):  $\delta$  7.96 (s, 2H), 7.87-7.66 (m, 5H), 7.63-7.50 (m, 10H), 7.10-7.06 (m, 3H), 6.83-6.80 (m, 2H), 5.60 (dd,  $J$  = 8.8, 3.2 Hz, 1H), 4.96-4.87 (m, 1H), 3.50 (dd,  $J$  = 14.4, 3.2 Hz, 1H), 2.70 (dd,  $J$  = 14.4, 8.8 Hz, 1H), 1.16 (d,  $J$  = 6.4 Hz, 3H), 1.08 (d,  $J$  = 6.4 Hz, 3H).  $^{13}\text{C}$  NMR (100 MHz,  $\text{CDCl}_3$ ):  $\delta$  167.0, 156.6, 156.3, 136.1, 133.1, 132.1, 132.0, 131.2, 129.3, 129.1, 128.8, 128.5, 128.2, 128.1, 127.3, 126.8, 72.0, 70.4, 37.1, 21.1, 20.8.  $^{19}\text{F}$  NMR (565 MHz,  $\text{CDCl}_3$ ):  $\delta$  -152.76, -152.81. IR (neat): 2982, 1728, 1619, 1594, 1374, 1048, 999, 889, 760. 699  $\text{cm}^{-1}$ . HRMS (ESI) calcd. for  $\text{C}_{35}\text{H}_{32}\text{NO}_2$   $[\text{M}-\text{BF}_4]^+$ : 498.2428, found 498.2428.

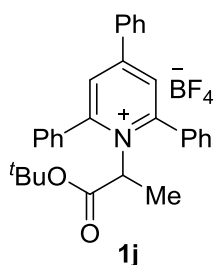

**1-(1-(*tert*-Butoxy)-1-oxopropan-2-yl)-2,4,6-triphenylpyridin-1-ium tetrafluoroborate (1j).**  $^1\text{H}$  NMR (600 MHz,  $\text{CDCl}_3$ ):  $\delta$  7.90 (s, 3H), 7.81-7.80 (m, 3H), 7.63-7.60 (m, 3H), 7.55-7.50 (m, 8H), 5.47 (q,  $J$  = 7.2 Hz, 1H), 1.41 (s, 9H), 1.30 (d,  $J$  = 9.0 Hz, 3H).  $^{13}\text{C}$  NMR (100 MHz,  $\text{CDCl}_3$ ):  $\delta$  168.3, 156.9, 156.3, 133.8, 133.2, 132.1, 131.2, 129.5, 128.9, 128.2, 84.7, 65.9, 27.6, 16.9. The spectroscopic data are in agreement with that previously reported.<sup>4</sup>

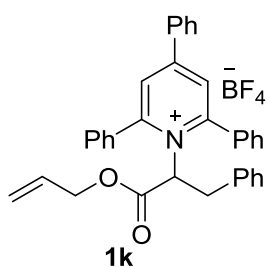

**1-(1-(Allyloxy)-1-oxo-3-phenylpropan-2-yl)-2,4,6-triphenylpyridin-1-ium tetrafluoroborate (1k).** 5.0 mmol scale, purification of the crude product by column chromatography on silica gel (eluent: petroleum ether: ethyl acetate = 5:1 to dichloromethane: acetone = 10:1, gradient) afforded the title product in 18% yield (0.52 g)

as a light-purple solid. M.p. = 95-96 °C.  $^1\text{H}$  NMR (400 MHz,  $\text{CDCl}_3$ ):  $\delta$  7.96 (s, 2H), 7.87-7.79 (m, 4H), 7.63-7.50 (m, 11H), 7.10-7.05 (m, 3H), 6.79 (dd,  $J = 7.2, 1.2$  Hz, 2H), 5.82-5.72 (m, 1H), 5.67 (dd,  $J = 8.4, 3.6$  Hz, 1H), 5.28 (dd,  $J = 10.4, 0.8$  Hz, 1H), 5.21 (dd,  $J = 17.2, 1.2$  Hz, 1H), 4.59-4.49 (m, 2H), 3.51 (dd,  $J = 14.4, 3.6$  Hz, 1H), 2.85 (dd,  $J = 14.4, 8.4$  Hz, 1H).  $^{13}\text{C}$  NMR (150 MHz,  $\text{CDCl}_3$ ):  $\delta$  167.1, 156.8, 136.1, 133.5, 132.4, 132.1, 131.5, 130.0, 129.6, 129.4, 129.0, 128.9, 128.5, 128.4, 127.7, 127.1, 120.5, 70.2, 67.7, 37.4 (*1 aromatic carbon signal is not observed due to signal overlap*).  $^{19}\text{F}$  NMR (565 MHz,  $\text{CDCl}_3$ ):  $\delta$  -152.72, -152.77. IR (neat): 3061, 1745, 1618, 1596, 1562, 1493, 1048, 999, 936, 891, 764, 700  $\text{cm}^{-1}$ . HRMS (ESI) calcd. for  $\text{C}_{35}\text{H}_{30}\text{NO}_2$   $[\text{M-BF}_4]^+$ : 496.2271, found 496.2271.

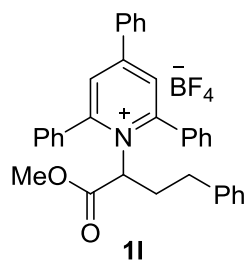

**1-(1-Methoxy-1-oxo-4-phenylbutan-2-yl)-2,4,6-triphenylpyridin-1-ium**

**tetrafluoroborate (1l).**  $^1\text{H}$  NMR (400 MHz,  $\text{CDCl}_3$ ):  $\delta$  7.88 (s, 2H), 7.80-7.78 (m, 2H), 7.74-7.69 (m, 2H), 7.56-7.45 (m, 11H), 7.15-7.11 (m, 3H), 6.93-6.91 (m, 2H), 5.36 (dd,  $J = 2.8, 9.2$  Hz, 1H), 3.72 (s, 3H), 2.46-2.33 (m, 3H), 2.06-1.99 (m, 1H).  $^{13}\text{C}$  NMR (100 MHz,  $\text{CDCl}_3$ ):  $\delta$  168.3, 156.82, 156.76, 138.6, 133.7, 132.3, 132.2, 131.3, 129.6, 129.1, 128.8, 128.5, 128.44, 128.35, 127.8, 126.4, 67.9, 53.7, 33.2, 33.0. The spectroscopic data are in agreement with that previously reported.<sup>1</sup>

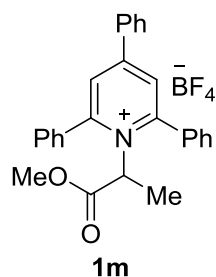

**1-(1-Methoxy-1-oxopropan-2-yl)-2,4,6-triphenylpyridin-1-ium tetrafluoroborate (1m).**

$^1\text{H}$  NMR (600 MHz,  $\text{CDCl}_3$ ):  $\delta$  7.87 (s, 2H), 7.79-7.74 (m, 4H), 7.67-7.59 (m, 4H), 7.57-7.53 (m, 5H), 7.49-7.47 (m, 2H), 5.53 (q,  $J = 7.2$  Hz, 1H), 3.68 (s, 3H), 1.48 (d,  $J = 7.2$  Hz, 3H).  $^{13}\text{C}$  NMR (150 MHz,  $\text{CDCl}_3$ ):  $\delta$  168.7, 156.9, 156.6, 133.8, 132.5, 132.1, 131.3, 129.5, 129.0, 128.9, 128.3, 127.7, 64.4, 53.6, 17.1. The spectroscopic data are in agreement with that previously reported.<sup>4</sup>

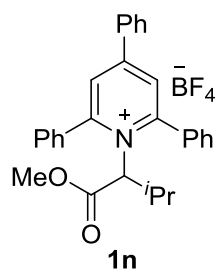

**1-(1-Methoxy-3-methyl-1-oxobutan-2-yl)-2,4,6-triphenylpyridin-1-ium**

**tetrafluoroborate (1n).**  $^1\text{H}$  NMR (400 MHz,  $\text{CDCl}_3$ ):  $\delta$  8.03 (s, 2H), 7.92-7.90 (m, 2H), 7.71 (br, 2H), 7.68-7.61 (m, 7H), 7.58-7.52 (m, 4H), 5.17 (d,  $J = 10.4$  Hz, 1H), 3.77 (s, 3H), 2.13-2.07 (m, 1H), 0.77-0.75 (m, 6H).  $^{13}\text{C}$  NMR (100 MHz,  $\text{CDCl}_3$ ):  $\delta$  166.8, 157.1, 157.0, 133.0, 132.8, 131.9, 131.8, 129.8, 129.4, 128.9, 128.6, 127.7, 73.5, 53.7, 29.9, 22.3, 19.2. The spectroscopic data are in agreement with that previously reported.<sup>4</sup>

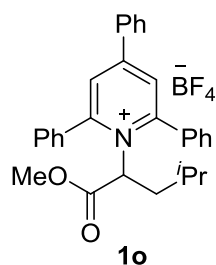

**1-(1-Methoxy-4-methyl-1-oxopentan-2-yl)-2,4,6-triphenylpyridin-1-ium**

**tetrafluoroborate (1o).**  $^1\text{H}$  NMR (600 MHz,  $\text{CDCl}_3$ ):  $\delta$  7.92 (s, 2H), 7.84-7.82 (m, 2H), 7.74 (br, 2H), 7.64-7.62 (m, 3H), 7.59-7.53 (m, 6H), 7.51-7.48 (m, 2H), 5.49 (dd,  $J = 4.2$ , 8.4 Hz, 1H), 3.77 (s, 3H), 1.75-1.71 (m, 1H), 1.62-1.57 (m, 1H), 1.35-1.32 (m, 1H), 0.59 (d,  $J = 6.6$  Hz, 3H), 0.44 (d,  $J = 6.6$  Hz, 3H).  $^{13}\text{C}$  NMR (150 MHz,  $\text{CDCl}_3$ ):  $\delta$  168.7, 156.7, 156.6, 133.6, 132.4, 132.2, 131.4, 129.5, 129.3, 129.0, 128.4, 127.8, 67.2, 53.7, 40.3, 26.0, 22.2, 20.6. The spectroscopic data are in agreement with that previously reported.<sup>1</sup>

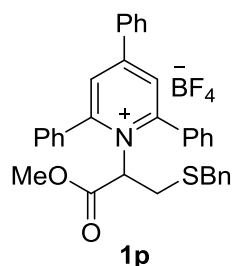

**1-(3-(Benzylthio)-1-methoxy-1-oxopropan-2-yl)-2,4,6-triphenylpyridin-1-ium**

**tetrafluoroborate (1p).** 5.0 mmol scale, purification of the crude product by column chromatography on silica gel (eluent: petroleum ether: ethyl acetate = 5:1 to dichloromethane: acetone = 10:1, gradient) afforded the title product in 36% yield (1.08 g) as a white solid. M.p. = 105-106 °C. <sup>1</sup>H NMR (600 MHz, CDCl<sub>3</sub>): δ 7.95 (s, 2H), 7.84-7.83 (m, 2H), 7.71-7.62 (m, 5H), 7.58-7.51 (m, 8H), 7.24-7.19 (m, 3H), 7.04-7.03 (m, 2H), 5.71 (dd, *J* = 8.4, 5.4 Hz, 1H), 3.71 (s, 3H), 3.60 (d, *J* = 12.6 Hz, 1H), 3.30 (d, *J* = 12.6 Hz, 1H), 3.08 (dd, *J* = 14.4, 4.8 Hz, 1H), 2.73 (dd, *J* = 14.4, 8.4 Hz, 1H). <sup>13</sup>C NMR (150 MHz, CDCl<sub>3</sub>): δ 167.3, 157.2, 136.8, 133.5, 132.6, 132.1, 131.7, 129.7, 129.3, 128.9, 128.52, 128.50, 127.6, 127.2, 69.0, 54.0, 37.1, 32.7 (*2 aromatic carbon signals are not observed due to signal overlap*). <sup>19</sup>F NMR (565 MHz, CDCl<sub>3</sub>): δ -152.37, -152.43. IR (neat): 3065, 1747, 1618, 1557, 1494, 1236, 1051, 999, 912, 763, 726, 701 cm<sup>-1</sup>. HRMS (ESI) calcd. for C<sub>34</sub>H<sub>30</sub>NO<sub>2</sub>S [M-BF<sub>4</sub>]<sup>+</sup>: 516.1992, found 516.1993.

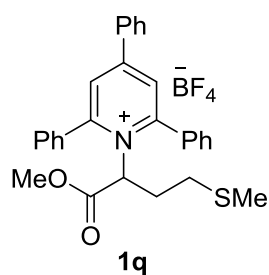

**1-(1-Methoxy-4-(methylthio)-1-oxobutan-2-yl)-2,4,6-triphenylpyridin-1-ium**

**tetrafluoroborate (1q).** <sup>1</sup>H NMR (600 MHz, CDCl<sub>3</sub>): δ 7.90 (s, 2H), 7.81-7.80 (m, 5H), 7.63-7.53 (m, 8H), 7.50-7.48 (m, 2H), 5.95 (dd, *J* = 2.4, 9.0 Hz, 1H), 3.75 (s, 3H), 2.35-2.30 (m, 2H), 2.27-2.24 (m, 1H), 1.91-1.89 (m, 1H), 1.85 (s, 3H). <sup>13</sup>C NMR (150 MHz, CDCl<sub>3</sub>): δ 168.5, 156.9, 133.8, 132.5, 132.1, 131.4, 129.5, 129.0, 128.4, 128.0, 66.6, 53.7, 31.3, 30.6, 14.6. The spectroscopic data are in agreement with that previously

reported.<sup>1</sup>

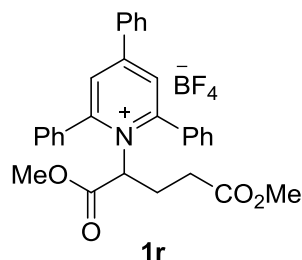

### 1-(1,5-Dimethoxy-1,5-dioxopentan-2-yl)-2,4,6-triphenylpyridin-1-ium

**tetrafluoroborate (1r).** <sup>1</sup>H NMR (400 MHz, CDCl<sub>3</sub>): δ 7.93 (s, 2H), 7.84-7.82 (m, 2H), 7.76-7.72 (m, 2H), 7.63-7.55 (m, 8H), 7.54-7.48 (m, 3H), 5.61 (t, *J* = 6.4 Hz, 1H), 3.73 (s, 3H), 3.48 (s, 3H), 2.29-2.17 (m, 3H), 2.13-2.06 (m, 1H). <sup>13</sup>C NMR (100 MHz, CDCl<sub>3</sub>): δ 171.9, 168.0, 157.0, 133.6, 132.4, 132.2, 131.5, 129.6, 129.2, 128.5, 127.9, 67.5, 53.8, 51.6, 30.6, 26.9. The spectroscopic data are in agreement with that previously reported.<sup>1</sup>

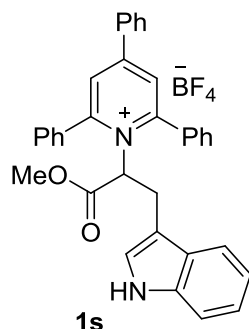

### 1-(3-(1H-Indol-3-yl)-1-methoxy-1-oxopropan-2-yl)-2,4,6-triphenylpyridin-1-ium

**tetrafluoroborate (1s).** <sup>1</sup>H NMR (600 MHz, CDCl<sub>3</sub>): δ 9.18 (s, 1H), 7.82-7.81 (m, 5H), 7.56-7.44 (m, 10H), 7.36-7.35 (m, 3H), 7.06-7.04 (m, 1H), 6.81-6.76 (m, 3H), 5.73 (dd, *J* = 4.8, 10.2 Hz, 1H), 3.79 (s, 3H), 3.31 (dd, *J* = 4.2, 15.6 Hz, 1H), 3.15 (dd, *J* = 10.2, 15.6 Hz, 1H). <sup>13</sup>C NMR (150 MHz, CDCl<sub>3</sub>): δ 168.0, 156.9, 136.0, 133.1, 132.7, 131.7, 131.4, 129.7, 129.0, 128.5, 126.3, 123.6, 121.9, 119.3, 116.8, 112.0, 106.3, 69.4, 53.9, 26.9. The spectroscopic data are in agreement with that previously reported.<sup>1</sup>

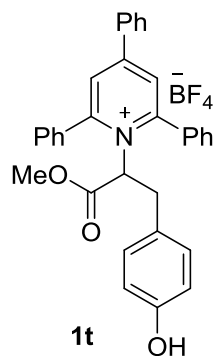

**1-(3-(4-Hydroxyphenyl)-1-methoxy-1-oxopropan-2-yl)-2,4,6-triphenylpyridin-1-ium tetrafluoroborate (1t).** <sup>1</sup>H NMR (600 MHz, CDCl<sub>3</sub>): δ 7.85 (s, 2H), 7.79-7.77 (m, 2H), 7.69 (br, 2H), 7.57-7.46 (m, 9H), 7.18 (br, 2H), 7.07 (s, 1H), 6.58 (d, *J* = 8.4 Hz, 2H), 6.39 (d, *J* = 8.4 Hz, 2H), 5.56 (t, *J* = 6.6 Hz, 1H), 3.68 (s, 3H), 3.08 (dd, *J* = 7.2, 15.0 Hz, 1H), 2.89 (dd, *J* = 6.0, 15.0 Hz, 1H). <sup>13</sup>C NMR (150 MHz, CDCl<sub>3</sub>): δ 167.6, 157.2, 156.7, 156.2, 133.1, 132.7, 131.8, 131.7, 129.7, 129.6, 129.1, 128.4, 127.5, 125.7, 116.0, 70.5, 53.8, 36.4. The spectroscopic data are in agreement with that previously reported.<sup>1</sup>

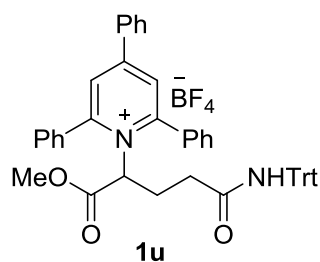

**1-(1-Methoxy-1,5-dioxo-5-(tritylamino)pentan-2-yl)-2,4,6-triphenylpyridin-1-ium tetrafluoroborate (1u).** <sup>1</sup>H NMR (400 MHz, CDCl<sub>3</sub>): δ 7.94 (s, 2H), 7.84-7.79 (m, 3H), 7.70 (s, 2H), 7.61-7.42 (m, 11H), 7.24-7.14 (m, 15H), 5.54 (dd, *J* = 4.8, 10.4 Hz, 1H), 3.71 (s, 3H), 2.56-2.48 (m, 1H), 2.21-2.15 (m, 1H), 2.10-2.02 (m, 1H), 1.51-1.46 (m, 1H). <sup>13</sup>C NMR (100 MHz, CDCl<sub>3</sub>): δ 169.6, 169.2, 157.3, 144.7, 133.8, 132.7, 132.3, 131.5, 129.6, 129.2, 128.6, 128.5, 127.6, 126.5, 70.1, 69.0, 53.8, 31.7, 25.5. The spectroscopic data are in agreement with that previously reported.<sup>1</sup>



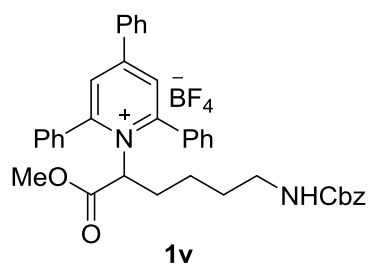

**1-(6-(((Benzyloxy)carbonyl)amino)-1-methoxy-1-oxohexan-2-yl)-2,4,6-triphenylpyridin-1-ium tetrafluoroborate (1v).**  $^1\text{H}$  NMR (600 MHz,  $\text{CDCl}_3$ ):  $\delta$  7.90 (s, 2H), 7.80-7.77 (m, 2H), 7.72-7.67 (m, 2H), 7.61-7.53 (m, 8H), 7.50-7.47 (m, 2H), 7.32-7.24 (m, 6H), 5.44 (t,  $J = 6.0$  Hz, 1H), 5.32 (t,  $J = 6.6$  Hz, 1H), 5.03 (s, 2H), 3.70 (s, 3H), 3.02 (q,  $J = 6.0$  Hz, 1H), 1.82-1.76 (m, 1H), 1.70-1.64 (m, 1H), 1.35-1.28 (m, 1H), 1.24-1.16 (m, 1H), 1.13-1.08 (m, 1H), 1.06-0.97 (m, 1H).  $^{13}\text{C}$  NMR (150 MHz,  $\text{CDCl}_3$ ):  $\delta$  168.3, 156.8, 156.5, 136.8, 133.6, 132.3, 131.5, 129.6, 129.5, 129.1, 129.0, 128.4, 128.34, 128.30, 127.8, 127.7, 127.6, 68.9, 66.0, 53.7, 39.8, 30.9, 28.4, 23.9. The spectroscopic data are in agreement with that previously reported.<sup>1</sup>

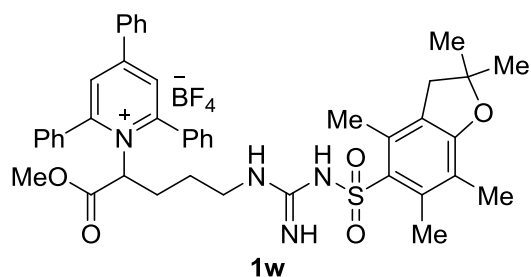

**1-(1-Methoxy-1-oxo-5-(3-((2,2,4,6,7-pentamethyl-2,3-dihydrobenzofuran-5-yl)sulfonyl)guanidino)pentan-2-yl)-2,4,6-triphenylpyridin-1-ium tetrafluoroborate (1w).**  $^1\text{H}$  NMR (600 MHz,  $\text{CDCl}_3$ ):  $\delta$  7.98 (s, 2H), 7.85-7.83 (m, 2H), 7.75-7.69 (m, 2H), 7.60-7.50 (m, 8H), 7.47-7.41 (m, 3H), 6.15 (br, 2H), 5.84 (br, 1H), 5.30 (dd,  $J = 4.8, 6.6$  Hz, 1H), 3.70 (s, 3H), 3.01-2.98 (m, 1H), 2.93-2.91 (m, 3H), 2.52 (s, 3H), 2.47 (s, 3H), 2.06 (s, 3H), 1.94-1.90 (m, 1H), 1.73-1.71 (m, 1H), 1.45 (s, 6H), 1.34-1.31 (m, 1H), 1.07 (m, 1H).  $^{13}\text{C}$  NMR (150 MHz,  $\text{CDCl}_3$ ):  $\delta$  167.8, 158.3, 156.7, 155.9, 138.0, 133.2, 133.1, 132.5, 131.9, 131.8, 131.7, 129.6, 129.3, 128.6, 128.2, 124.3, 117.1, 86.1, 68.3, 53.7, 43.0, 39.0, 29.1, 28.4, 26.9, 19.0, 17.7, 12.3. The spectroscopic data are in agreement with that previously reported.<sup>1</sup>

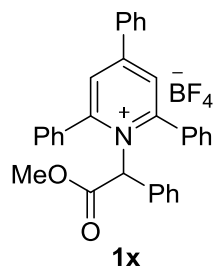

**1-(2-Methoxy-2-oxo-1-phenylethyl)-2,4,6-triphenylpyridin-1-ium tetrafluoroborate (1x).**  $^1\text{H}$  NMR (600 MHz,  $\text{CDCl}_3$ ):  $\delta$  7.95 (s, 2H), 7.87-7.86 (m, 2H), 7.81-7.74 (m, 2H), 7.56-7.44 (m, 7H), 7.42-7.26 (m, 2H), 7.13 (t,  $J = 7.8$  Hz, 1H), 7.07 (t,  $J = 7.8$  Hz, 2H), 6.99 (br, 2H), 6.79-6.78 (m, 3H), 3.91 (s, 3H).  $^{13}\text{C}$  NMR (150 MHz,  $\text{CDCl}_3$ ):  $\delta$  167.4, 157.4, 157.2, 133.6, 132.8, 132.4, 130.9, 130.7, 129.6, 129.0, 128.9, 128.7, 128.6, 128.5, 128.4, 128.1, 71.5, 54.0. The spectroscopic data are in agreement with that previously reported.<sup>2</sup>

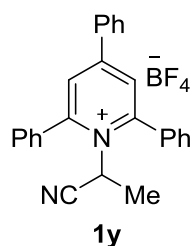

**1-(1-Cyanoethyl)-2,4,6-triphenylpyridin-1-ium tetrafluoroborate (1y).**  $^1\text{H}$  NMR (400 MHz,  $\text{CDCl}_3$ ):  $\delta$  7.96 (s, 4H), 7.84-7.80 (m, 4H), 7.71-7.64 (m, 6H), 7.58 (t,  $J = 7.2$  Hz, 1H), 7.52 (t,  $J = 7.6$  Hz, 2H), 5.74 (q,  $J = 7.2$  Hz, 1H), 1.54 (d,  $J = 7.2$  Hz, 3H).  $^{13}\text{C}$  NMR (100 MHz,  $\text{CDCl}_3$ ):  $\delta$  158.0, 157.4, 133.6, 132.6, 132.0, 129.8, 129.7, 129.6, 128.5, 128.3, 116.9, 52.6, 19.3. The spectroscopic data are in agreement with that previously reported.<sup>1</sup>

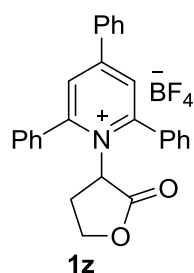

**1-(2-Oxotetrahydrofuran-3-yl)-2,4,6-triphenylpyridin-1-ium tetrafluoroborate (1z).**  $^1\text{H}$  NMR (600 MHz,  $\text{CDCl}_3$ ):  $\delta$  8.04-8.02 (m, 3H), 7.90 (s, 1H), 7.82-7.81 (m, 2H), 7.70

(br, 1H), 7.64-7.57 (m, 6H), 7.54-7.48 (m, 4H), 5.64 (dd,  $J = 9.0, 12.0$  Hz, 1H), 3.98 (dd,  $J = 8.4, 16.8$  Hz, 1H), 3.35 (td,  $J = 4.2, 9.6$  Hz, 1H), 2.98-2.91 (m, 1H), 2.74-2.68 (m, 1H).  $^{13}\text{C}$  NMR (100 MHz,  $\text{CDCl}_3$ ):  $\delta$  171.8, 159.1, 156.8, 156.2, 133.4, 132.6, 132.5, 131.7, 131.5, 131.13, 131.06, 130.0, 129.7, 129.3, 128.6, 128.3, 126.5, 66.5, 63.5, 27.3. The spectroscopic data are in agreement with that previously reported.<sup>2</sup>

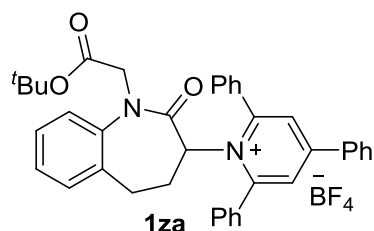

**1-(1-(2-(*tert*-Butoxy)-2-oxoethyl)-2-oxo-2,3,4,5-tetrahydro-1H-benzo[b]azepin-3-yl)-2,4,6-triphenylpyridin-1-ium tetrafluoroborate (1za).**  $^1\text{H}$  NMR (600 MHz,  $\text{CDCl}_3$ ):  $\delta$  8.05 (br, 2H), 7.87 (d,  $J = 2.4$  Hz, 1H), 7.77-7.74 (m, 3H), 7.61-7.57 (m, 2H), 7.55-7.47 (m, 6H), 7.42 (t,  $J = 7.8$  Hz, 1H), 7.25 (d,  $J = 7.8$  Hz, 1H), 7.21 (t,  $J = 7.2$  Hz, 1H), 7.06-7.02 (m, 2H), 7.00-6.99 (m, 1H), 6.54-6.53 (m, 1H), 5.54 (dd,  $J = 7.2, 11.4$  Hz, 1H), 4.43 (d,  $J = 16.2$  Hz, 1H), 4.14 (d,  $J = 16.8$  Hz, 1H), 2.74-2.68 (m, 1H), 2.51-2.46 (m, 1H), 2.38-2.35 (m, 1H), 2.00-1.95 (m, 1H), 1.46 (s, 9H).  $^{13}\text{C}$  NMR (150 MHz,  $\text{CDCl}_3$ ):  $\delta$  167.5, 166.9, 158.4, 157.5, 155.7, 139.3, 135.2, 133.9, 133.2, 132.8, 131.9, 130.8, 130.6, 129.7, 129.54, 129.50, 128.8, 128.6, 128.3, 128.2, 127.53, 128.45, 127.4, 126.2, 121.9, 82.4, 69.1, 51.6, 32.5, 27.9, 27.4. The spectroscopic data are in agreement with that previously reported.<sup>5</sup>

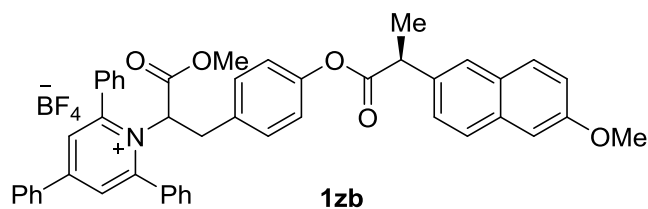

**1-(1-Methoxy-3-(4-(((*S*)-2-(6-methoxynaphthalen-2-yl)propanoyl)oxy)phenyl)-1-oxopropan-2-yl)-2,4,6-triphenylpyridin-1-ium tetrafluoroborate (1zb).**  $^1\text{H}$  NMR (600 MHz,  $\text{CDCl}_3$ ):  $\delta$  7.877 (s, 1H), 7.873 (s, 1H), 7.78-7.68 (m, 7H), 7.56-7.39 (m, 12H), 7.14-7.12 (m, 2H), 6.72 (d,  $J = 9.0$  Hz, 2H), 6.69 (d,  $J = 9.0$  Hz, 2H), 5.56 (dd,  $J = 4.8, 7.2$  Hz, 1H), 4.03 (q,  $J = 6.6$  Hz, 1H), 3.884 (s, 1.5H), 3.881 (s, 1.5H), 3.669 (s, 1.5H), 3.663 (s, 1.5H),

3.38-3.35 (m, 1H), 2.95-2.91 (m, 1H), 1.65-1.63 (m, 3H).  $^{13}\text{C}$  NMR (150 MHz,  $\text{CDCl}_3$ ):  $\delta$  173.08, 173.07, 167.4, 157.6, 156.8, 149.9, 134.9, 134.8, 133.7, 133.53, 133.48, 133.4, 132.3, 132.0, 131.5, 129.9, 129.5, 129.4, 129.1, 129.0, 128.8, 128.40, 128.39, 127.31, 127.28, 126.0, 125.92, 125.88, 121.6, 121.5, 119.0, 105.5, 69.9, 55.2, 53.7, 45.3, 36.84, 36.80, 18.34, 18.30. The spectroscopic data are in agreement with that previously reported.<sup>1</sup>

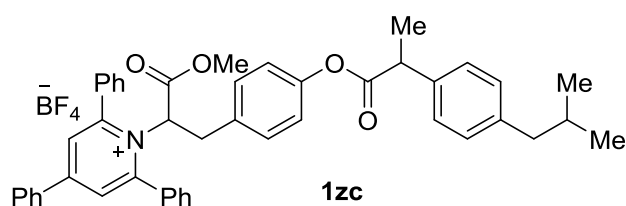

**1-(3-(4-((2-(4-Isobutylphenyl)propanoyl)oxy)phenyl)-1-methoxy-1-oxopropan-2-yl)-2,4,6-triphenylpyridin-1-ium tetrafluoroborate (1z c).**  $^1\text{H}$  NMR (600 MHz,  $\text{CDCl}_3$ ):  $\delta$  7.886 (s, 1H), 7.883 (s, 1H), 7.80-7.74 (m, 4H), 7.58-7.56 (m, 2H), 7.53-7.51 (m, 5H), 7.47-7.40 (m, 4H), 7.26-7.25 (m, 2H), 7.14-7.12 (m, 2H), 6.73 (d,  $J = 8.4$  Hz, 2H), 6.70 (d,  $J = 8.4$  Hz, 2H), 5.57 (dd,  $J = 5.4, 7.2$  Hz, 1H), 3.88 (q,  $J = 7.2$  Hz, 1H), 3.682 (s, 1.5H), 3.677 (s, 1.5H), 3.37 (dt,  $J = 4.2, 14.4$  Hz, 1H), 2.95 (dd,  $J = 7.2, 14.4$  Hz, 1H), 2.46 (dd,  $J = 3.0, 7.2$  Hz, 2H), 1.88-1.83 (m, 1H), 1.59-1.55 (m, 3H), 0.91-0.89 (m, 6H).  $^{13}\text{C}$  NMR (150 MHz,  $\text{CDCl}_3$ ):  $\delta$  173.11, 173.09, 167.3, 156.8, 149.9, 140.7, 137.0, 136.9, 133.5, 133.4, 132.3, 131.9, 131.5, 129.8, 129.5, 129.4, 129.3, 129.0, 128.4, 127.6, 127.02, 127.00, 121.6, 121.5, 69.9, 53.7, 45.0, 44.8, 36.84, 36.79, 30.0, 22.2, 18.36, 18.35. The spectroscopic data are in agreement with that previously reported.<sup>1</sup>

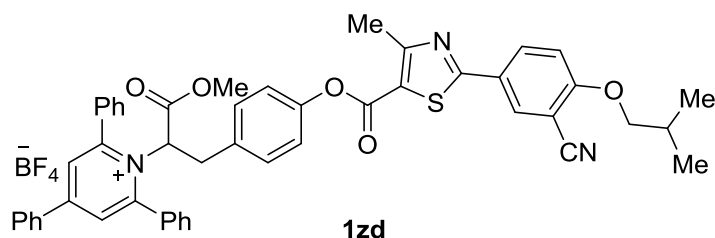

**1-(3-(4-((2-(3-Cyano-4-isobutoxyphenyl)-4-methylthiazole-5-carbonyl)oxy)phenyl)-1-methoxy-1-oxopropan-2-yl)-2,4,6-triphenylpyridin-1-ium tetrafluoroborate (1z d).**  $^1\text{H}$  NMR (600 MHz,  $\text{CDCl}_3$ ):  $\delta$  8.19 (d,  $J = 1.8$  Hz, 1H), 8.10 (dd,  $J = 2.4, 9.0$  Hz, 1H), 7.96 (s,

2H), 7.85-7.83 (m, 4H), 7.63-7.49 (m, 11H), 7.07 (d,  $J = 9.0$  Hz, 1H), 6.93 (d,  $J = 9.0$  Hz, 2H), 6.86 (d,  $J = 8.4$  Hz, 2H), 5.64 (dd,  $J = 4.2, 7.2$  Hz, 1H), 3.92 (d,  $J = 6.0$  Hz, 2H), 3.72 (s, 3H), 3.48 (dd,  $J = 4.8, 14.4$  Hz, 1H), 2.99 (dd,  $J = 7.8, 14.4$  Hz, 1H), 2.78 (s, 3H), 2.20-2.17 (m, 1H), 1.08 (d,  $J = 6.6$  Hz, 6H).  $^{13}\text{C}$  NMR (150 MHz,  $\text{CDCl}_3$ ):  $\delta$  168.2, 167.6, 162.9, 162.6, 160.3, 156.9, 149.3, 134.1, 133.5, 132.8, 132.4, 132.1, 132.0, 131.6, 130.2, 129.6, 129.4, 129.1, 128.5, 127.8, 125.6, 121.8, 120.3, 115.3, 112.8, 102.8, 75.6, 70.0, 53.8, 36.9, 28.0, 18.9, 17.6. The spectroscopic data are in agreement with that previously reported.<sup>1</sup>

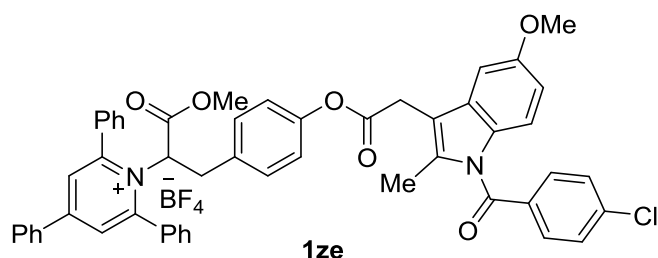

**1-(3-(4-(2-(1-(4-Chlorobenzoyl)-5-methoxy-2-methyl-1H-indol-3-yl)acetoxy)phenyl)-1-methoxy-1-oxopropan-2-yl)-2,4,6-triphenylpyridin-1-ium tetrafluoroborate (1ze).**  $^1\text{H}$  NMR (600 MHz,  $\text{CDCl}_3$ ):  $\delta$  7.92 (s, 2H), 7.82-7.80 (m, 4H), 7.66-7.64 (m, 2H), 7.59-7.52 (m, 7H), 7.49-7.43 (m, 6H), 7.01 (d,  $J = 3.0$  Hz, 1H), 6.89 (d,  $J = 9.0$  Hz, 1H), 6.80-6.76 (m, 4H), 6.68 (dd,  $J = 3.0, 9.0$  Hz, 1H), 5.59 (dd,  $J = 4.8, 7.2$  Hz, 1H), 3.86 (s, 2H), 3.81 (s, 3H), 3.68 (s, 3H), 3.42 (dd,  $J = 4.8, 15.0$  Hz, 1H), 2.94 (dd,  $J = 7.2, 14.4$  Hz, 1H), 2.41 (s, 3H).  $^{13}\text{C}$  NMR (150 MHz,  $\text{CDCl}_3$ ):  $\delta$  169.2, 168.2, 167.5, 156.9, 156.8, 156.0, 149.7, 139.2, 136.1, 133.8, 133.7, 133.5, 132.4, 132.0, 131.5, 131.1, 130.7, 130.4, 130.0, 129.6, 129.4, 129.1, 128.5, 127.7, 121.6, 114.9, 111.9, 111.6, 101.2, 70.0, 55.7, 53.7, 36.9, 30.3, 13.3. The spectroscopic data are in agreement with that previously reported.<sup>1</sup>

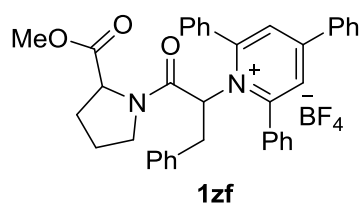

**1-(1-(2-(Methoxycarbonyl)pyrrolidin-1-yl)-1-oxo-3-phenylpropan-2-yl)-2,4,6-triphenyl**

**1-pyridin-1-ium tetrafluoroborate (1zf).**  $^1\text{H}$  NMR (600 MHz,  $\text{CDCl}_3$ ):  $\delta$  8.23 (br, 2H), 7.87 (s, 2H), 7.80-7.79 (m, 2H), 7.56-7.50 (m, 11H), 7.18-7.14 (m, 4H), 7.12-7.09 (m, 1H), 5.84 (dd,  $J = 3.0, 11.4$  Hz, 1H), 4.17 (t,  $J = 6.6$  Hz, 1H), 3.75 (s, 3H), 3.54 (dd,  $J = 2.4, 13.2$  Hz, 1H), 2.48 (dd,  $J = 4.8, 13.2$  Hz, 1H), 1.99-1.94 (m, 1H), 1.64-1.58 (m, 1H), 1.34-1.30 (m, 1H), 1.28-1.24 (m, 3H).  $^{13}\text{C}$  NMR (100 MHz,  $\text{CDCl}_3$ ):  $\delta$  171.3, 165.7, 157.3, 155.7, 135.9, 134.01, 133.97, 133.7, 132.1, 131.0, 129.7, 129.6, 128.8, 128.6, 128.3, 128.1, 127.2, 72.7, 60.2, 52.1, 46.1, 39.2, 28.4, 24.8. The spectroscopic data are in agreement with that previously reported.<sup>1</sup>

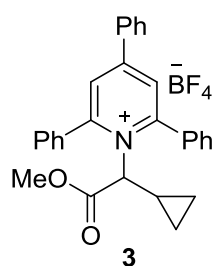

### 1-(1-Cyclopropyl-2-methoxy-2-oxoethyl)-2,4,6-triphenylpyridin-1-ium

**tetrafluoroborate (3).**  $^1\text{H}$  NMR (400 MHz,  $\text{CDCl}_3$ ):  $\delta$  7.99 (s, 2H), 7.89-7.88 (m, 2H), 7.69 (br, 2H), 7.62-7.51 (m, 11H), 4.71 (d,  $J = 8.0$  Hz, 1H), 3.81 (s, 3H), 0.69-0.64 (m, 1H), 0.61-0.58 (m, 2H), 0.43-0.39 (m, 1H), 0.05-0.01 (m, 1H).  $^{13}\text{C}$  NMR (100 MHz,  $\text{CDCl}_3$ ):  $\delta$  168.3, 156.9, 156.5, 133.5, 132.6, 132.4, 131.5, 129.7, 129.2, 128.5, 128.4, 127.6, 74.5, 54.0, 13.2, 10.7, 4.9. The spectroscopic data are in agreement with that previously reported.<sup>1</sup>

### General procedure for the ring expansion of amino acid derivatives

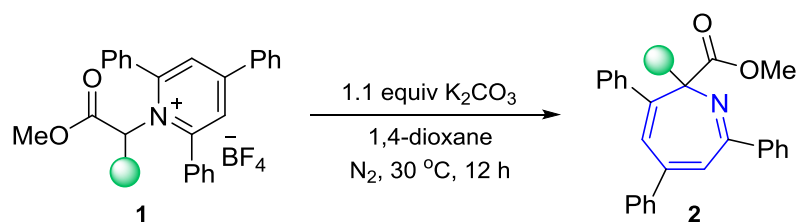

A sealable Schlenk tube (15.0 mL) was heated under vacuum using a heatgun, and evacuated and back-filled with nitrogen for three times. After the tube was cooled to room

temperature, pyridinium salts **1** (1.0 equiv) and  $K_2CO_3$  (1.1 equiv) were added under  $N_2$  atmosphere. Then, the tube was re-evacuated and refilled with nitrogen for three times before adding 1,4-dioxane (0.1 M with respect to **1**) via a syringe. The Schlenk tube was securely sealed and immersed into an oil bath preheated at 30 °C. After stirring at the same temperature for 12 h, the reaction mixture was filtered through a short pad of silica gel, and rinsed with ethyl acetate. Then, the resulting organic layer was evaporated under the reduced pressure, and the residue was purified by column chromatography on silica gel to afford the target azepine product **2**.

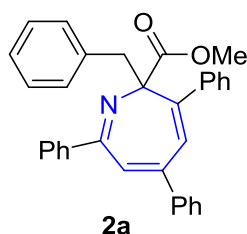

**Methyl 2-benzyl-3,5,7-triphenyl-2H-azepine-2-carboxylate (2a).** 0.3 mmol scale, under  $N_2$  atmosphere, pyridinium salt **1a** (0.3 mmol, 167.2 mg),  $K_2CO_3$  (0.33 mmol, 45.6 mg) and 1,4-dioxane (3.0 mL) were stirred at 30 °C for 12 h. Then the reaction mixture was filtered through a short pad of silica gel, rinsed with ethyl acetate, and concentrated under vacuum. The residue was purified by column chromatography on silica gel (eluent: petroleum ether: ethyl acetate = 50:1 to 25:1, gradient) to afford the title product in 98% yield (137.6 mg) as a white solid. M.p. = 97-98 °C.  $^1H$  NMR (600 MHz,  $CDCl_3$ ):  $\delta$  7.82-7.81 (m, 2H), 7.42 (d,  $J = 7.2$  Hz, 2H), 7.40 (d,  $J = 6.6$  Hz, 2H), 7.36-7.35 (m, 3H), 7.32-7.21 (m, 9H), 7.16 (t,  $J = 7.8$  Hz, 2H), 7.10 (q,  $J = 7.2$  Hz, 1H), 6.38 (s, 1H), 3.43 (d,  $J = 13.2$  Hz, 1H), 3.13 (s, 3H), 3.04 (d,  $J = 13.2$  Hz, 1H).  $^{13}C$  NMR (150 MHz,  $CDCl_3$ ):  $\delta$  172.3, 164.1, 147.5, 147.3, 140.1, 140.0, 139.7, 137.2, 130.6, 129.83, 129.81, 129.0, 128.8, 128.7, 128.6, 128.3, 128.0, 127.7, 127.4, 127.2, 126.5, 72.2, 51.3, 47.0 (*1 aromatic carbon signal is not observed due to signal overlap*). IR (neat): 3027, 1709, 1493, 1257, 1206, 1082, 886, 767, 758, 739, 696  $cm^{-1}$ . HRMS (ESI) calcd. for  $C_{33}H_{28}NO_2$   $[M+H]^+$ : 470.2115, found 470.2115.

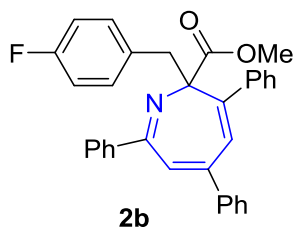

**Methyl 2-(4-fluorobenzyl)-3,5,7-triphenyl-2H-azepine-2-carboxylate (2b).** 0.3 mmol scale, under N<sub>2</sub> atmosphere, pyridinium salt **1b** (0.3 mmol, 172.6 mg), K<sub>2</sub>CO<sub>3</sub> (0.33 mmol, 45.6 mg) and 1,4-dioxane (3.0 mL) were stirred at 30 °C for 12 h. Then the reaction mixture was filtered through a short pad of silica gel, rinsed with ethyl acetate, and concentrated under vacuum. The residue was purified by column chromatography on silica gel (eluent: petroleum ether: ethyl acetate = 100:1 to 25:1, gradient) to afford the title product in 92% yield (134.0 mg) as a white solid. M.p. = 95-96 °C. <sup>1</sup>H NMR (600 MHz, CDCl<sub>3</sub>): δ 7.89-7.88 (m, 2H), 7.50 (d, *J* = 7.8 Hz, 2H), 7.47-7.44 (m, 5H), 7.40-7.38 (m, 3H), 7.36-7.31 (m, 4H), 7.26 (dd, *J* = 7.8, 6.0 Hz, 2H), 6.93 (t, *J* = 8.4 Hz, 2H), 6.46 (s, 1H), 3.46 (d, *J* = 13.2 Hz, 1H), 3.23 (s, 3H), 3.09 (d, *J* = 13.2 Hz, 1H). <sup>13</sup>C NMR (150 MHz, CDCl<sub>3</sub>): δ 172.3, 164.3, 161.9 (d, *J* = 242.9 Hz), 147.4, 147.3, 140.0, 139.9, 139.6, 132.9 (d, *J* = 3.3 Hz), 131.9 (d, *J* = 7.7 Hz), 129.9, 129.8, 128.9, 128.8, 128.7, 128.5, 128.3, 128.1, 127.8, 127.5, 127.1, 114.2 (d, *J* = 20.9 Hz), 72.0, 51.3, 46.1. <sup>19</sup>F NMR (565 MHz, CDCl<sub>3</sub>): δ -116.82. IR (neat): 2947, 1723, 1595, 1508, 1220, 1156, 835, 756, 695, 601, 573, 565 cm<sup>-1</sup>. HRMS (ESI) calcd. for C<sub>33</sub>H<sub>27</sub>FNO<sub>2</sub> [M+H]<sup>+</sup>: 488.2020, found 488.2021.

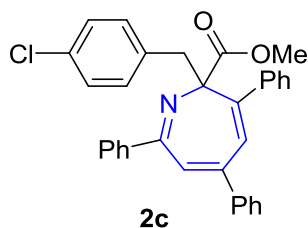

**Methyl 2-(4-chlorobenzyl)-3,5,7-triphenyl-2H-azepine-2-carboxylate (2c).** 0.3 mmol scale, under N<sub>2</sub> atmosphere, pyridinium salt **1c** (0.3 mmol, 177.6 mg), K<sub>2</sub>CO<sub>3</sub> (0.33 mmol, 45.6 mg) and 1,4-dioxane (3.0 mL) were stirred at 30 °C for 12 h. Then the reaction mixture was filtered through a short pad of silica gel, rinsed with ethyl acetate, and concentrated under vacuum. The residue was purified by column chromatography on silica gel (eluent: petroleum ether: ethyl acetate = 100:1 to 25:1, gradient) to afford the title



product in 88% yield (133.3 mg) as a white solid. M.p. = 92-93 °C. <sup>1</sup>H NMR (400 MHz, CDCl<sub>3</sub>): δ 7.89-7.86 (m, 2H), 7.52-7.50 (m, 2H), 7.45-7.44 (m, 5H), 7.41-7.31 (m, 7H), 7.25-7.20 (m, 4H), 6.46 (d, *J* = 1.2 Hz, 1H), 3.45 (d, *J* = 13.2 Hz, 1H), 3.24 (s, 3H), 3.08 (d, *J* = 13.2 Hz, 1H). <sup>13</sup>C NMR (100 MHz, CDCl<sub>3</sub>): δ 172.2, 164.3, 147.4, 147.3, 140.0, 139.8, 139.5, 135.8, 132.4, 131.9, 129.9, 129.8, 128.9, 128.8, 128.7, 128.5, 128.3, 128.1, 127.8, 127.6, 127.5, 127.1, 72.0, 51.4, 46.2. IR (neat): 2945, 1721, 1593, 1490, 1174, 1075, 1016, 840, 756, 694, 603, 566 cm<sup>-1</sup>. HRMS (ESI) calcd. for C<sub>33</sub>H<sub>27</sub>ClNO<sub>2</sub> [M+H]<sup>+</sup>: 504.1725, found 504.1725.

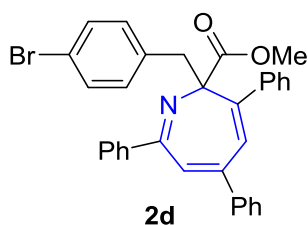

**Methyl 2-(4-bromobenzyl)-3,5,7-triphenyl-2H-azepine-2-carboxylate (2d).** 0.3 mmol scale, under N<sub>2</sub> atmosphere, pyridinium salt **1d** (0.3 mmol, 190.9 mg), K<sub>2</sub>CO<sub>3</sub> (0.33 mmol, 45.6 mg) and 1,4-dioxane (3.0 mL) were stirred at 30 °C for 12 h. Then the reaction mixture was filtered through a short pad of silica gel, rinsed with ethyl acetate, and concentrated under vacuum. The residue was purified by column chromatography on silica gel (eluent: petroleum ether: ethyl acetate = 100:1 to 25:1, gradient) to afford the title product in 93% yield (153.7 mg) as a white solid. M.p. = 106-107 °C. <sup>1</sup>H NMR (600 MHz, CDCl<sub>3</sub>): δ 7.78-7.76 (m, 2H), 7.39-7.38 (m, 2H), 7.35-7.32 (m, 5H), 7.28-7.20 (m, 9H), 7.07 (d, *J* = 8.4 Hz, 2H), 6.35 (d, *J* = 1.2 Hz, 1H), 3.33 (d, *J* = 13.2 Hz, 1H), 3.12 (s, 3H), 2.95 (d, *J* = 13.2 Hz, 1H). <sup>13</sup>C NMR (100 MHz, CDCl<sub>3</sub>): δ 172.1, 164.2, 147.3, 147.2, 139.9, 139.8, 139.4, 136.2, 132.2, 130.5, 129.9, 129.7, 128.80, 128.78, 128.7, 128.5, 128.3, 128.0, 127.8, 127.5, 127.1, 120.6, 71.9, 51.3, 46.2. IR (neat): 2947, 1723, 1487, 1172, 1070, 1012, 836, 755, 694, 644, 603, 563 cm<sup>-1</sup>. HRMS (ESI) calcd. for C<sub>33</sub>H<sub>27</sub>BrNO<sub>2</sub> [M+H]<sup>+</sup>: 548.1220, found 548.1220.

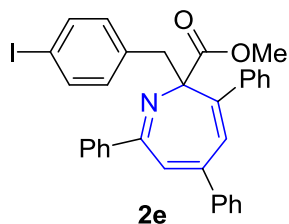

**Methyl 2-(4-iodobenzyl)-3,5,7-triphenyl-2H-azepine-2-carboxylate (2e).** 0.3 mmol scale, under N<sub>2</sub> atmosphere, pyridinium salt **1e** (0.3 mmol, 205.0 mg), K<sub>2</sub>CO<sub>3</sub> (0.33 mmol, 45.6 mg) and 1,4-dioxane (3.0 mL) were stirred at 30 °C for 12 h. Then the reaction mixture was filtered through a short pad of silica gel, rinsed with ethyl acetate, and concentrated under vacuum. The residue was purified by column chromatography on silica gel (eluent: petroleum ether: ethyl acetate = 25:1) to afford the title product in 85% yield (151.7 mg) as a white solid. M.p. = 100-101 °C. <sup>1</sup>H NMR (600 MHz, CDCl<sub>3</sub>): δ 7.88-7.87 (m, 2H), 7.57 (d, *J* = 9.0 Hz, 2H), 7.52-7.50 (m, 2H), 7.47-7.45 (m, 5H), 7.42-7.34 (m, 7H), 7.05 (d, *J* = 8.4 Hz, 2H), 6.46 (d, *J* = 1.2 Hz, 1H), 3.42 (d, *J* = 13.2 Hz, 1H), 3.25 (s, 3H), 3.04 (d, *J* = 13.2 Hz, 1H). <sup>13</sup>C NMR (150 MHz, CDCl<sub>3</sub>): δ 172.2, 164.3, 147.4, 147.3, 140.0, 139.8, 139.5, 137.0, 136.5, 132.6, 129.9, 129.8, 128.9, 128.84, 128.75, 128.6, 128.4, 128.1, 127.8, 127.5, 127.2, 92.3, 71.9, 51.4, 46.4. IR (neat): 2945, 1723, 1484, 1241, 1172, 1008, 836, 755, 694, 636, 603, 562 cm<sup>-1</sup>. HRMS (ESI) calcd. for C<sub>33</sub>H<sub>27</sub>INO<sub>2</sub> [M+H]<sup>+</sup>: 596.1081, found 596.1081.

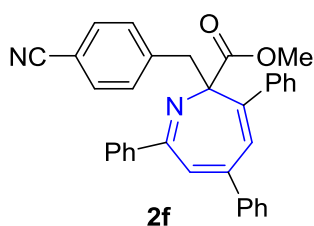

**Methyl 2-(4-cyanobenzyl)-3,5,7-triphenyl-2H-azepine-2-carboxylate (2f).** 0.3 mmol scale, under N<sub>2</sub> atmosphere, pyridinium salt **1f** (0.3 mmol, 174.7 mg), K<sub>2</sub>CO<sub>3</sub> (0.33 mmol, 45.6 mg) and 1,4-dioxane (3.0 mL) were stirred at 30 °C for 12 h. Then the reaction mixture was filtered through a short pad of silica gel, rinsed with ethyl acetate, and concentrated under vacuum. The residue was purified by column chromatography on silica gel (eluent: petroleum ether: ethyl acetate = 10:1) to afford the title product in 95% yield (141.0 mg) as a white solid. M.p. = 97-98 °C. <sup>1</sup>H NMR (400 MHz, CDCl<sub>3</sub>): δ 7.87-7.85 (m,

2H), 7.54-7.49 (m, 4H), 7.46-7.40 (m, 9H), 7.38-7.34 (m, 5H), 6.47 (d,  $J = 1.2$  Hz, 1H), 3.52 (d,  $J = 13.2$  Hz, 1H), 3.25 (s, 3H), 3.13 (d,  $J = 12.8$  Hz, 1H).  $^{13}\text{C}$  NMR (100 MHz,  $\text{CDCl}_3$ ):  $\delta$  171.9, 164.3, 147.4, 146.9, 143.1, 139.7, 139.5, 139.3, 131.3, 131.1, 130.0, 129.7, 128.9, 128.7, 128.4, 128.3, 128.1, 127.8, 127.6, 127.0, 119.1, 110.3, 71.8, 51.4, 46.7 (*1 aromatic carbon signal is not observed due to signal overlap*). IR (neat): 2945, 2225, 1725, 1241, 1174, 1071, 844, 756, 695, 603, 577, 564  $\text{cm}^{-1}$ . HRMS (ESI) calcd. for  $\text{C}_{34}\text{H}_{27}\text{N}_2\text{O}_2$   $[\text{M}+\text{H}]^+$ : 495.2067, found 495.2068.

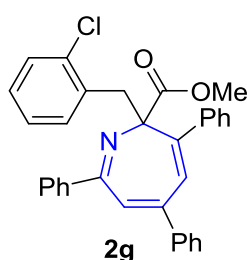

**Methyl 2-(2-chlorobenzyl)-3,5,7-triphenyl-2H-azepine-2-carboxylate (2g).** 0.3 mmol scale, under  $\text{N}_2$  atmosphere, pyridinium salt **1g** (0.3 mmol, 177.6 mg),  $\text{K}_2\text{CO}_3$  (0.33 mmol, 45.6 mg) and 1,4-dioxane (3.0 mL) were stirred at 30  $^\circ\text{C}$  for 12 h. Then the reaction mixture was filtered through a short pad of silica gel, rinsed with ethyl acetate, and concentrated under vacuum. The residue was purified by column chromatography on silica gel (eluent: petroleum ether: ethyl acetate = 100:1 to 25:1, gradient) to afford the title product in 88% yield (132.9 mg) as a white solid. M.p. = 158-159  $^\circ\text{C}$ .  $^1\text{H}$  NMR (400 MHz,  $\text{CDCl}_3$ ):  $\delta$  7.89-7.87 (m, 3H), 7.53-7.51 (m, 4H), 7.43-7.41 (m, 3H), 7.40-7.31 (m, 7H), 7.27-7.22 (m, 2H), 7.12 (td,  $J = 8.0, 1.6$  Hz, 1H), 6.47 (d,  $J = 1.2$  Hz, 1H), 3.58 (d,  $J = 13.2$  Hz, 1H), 3.40 (d,  $J = 13.6$  Hz, 1H), 3.35 (s, 3H).  $^{13}\text{C}$  NMR (100 MHz,  $\text{CDCl}_3$ ):  $\delta$  171.7, 163.9, 147.8, 147.6, 140.1, 139.8, 139.6, 135.1, 134.9, 134.1, 129.8, 129.7, 129.0, 128.8, 128.71, 128.69, 128.3, 128.2, 128.0, 127.9, 127.8, 127.6, 127.2, 125.5, 70.8, 51.9, 42.5. IR (neat): 3028, 1719, 1593, 1443, 1251, 1176, 1079, 973, 757, 746, 697, 564  $\text{cm}^{-1}$ . HRMS (ESI) calcd. for  $\text{C}_{33}\text{H}_{27}\text{ClNO}_2$   $[\text{M}+\text{H}]^+$ : 504.1725, found 504.1725.

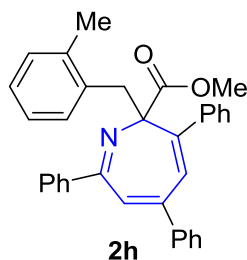

**Methyl 2-(2-methylbenzyl)-3,5,7-triphenyl-2H-azepine-2-carboxylate (2h).** 0.3 mmol scale, under N<sub>2</sub> atmosphere, pyridinium salt **1h** (0.3 mmol, 171.4 mg), K<sub>2</sub>CO<sub>3</sub> (0.33 mmol, 45.6 mg) and 1,4-dioxane (3.0 mL) were stirred at 30 °C for 12 h. Then the reaction mixture was filtered through a short pad of silica gel, rinsed with ethyl acetate, and concentrated under vacuum. The residue was purified by column chromatography on silica gel (eluent: petroleum ether: ethyl acetate = 25:1) to afford the title product in 92% yield (133.8 mg) as a white solid. M.p. = 149-150 °C. <sup>1</sup>H NMR (600 MHz, CDCl<sub>3</sub>): δ 7.86-7.84 (m, 2H), 7.53-7.49 (m, 4H), 7.44-7.37 (m, 9H), 7.36-7.34 (m, 1H), 7.33 (d, *J* = 1.8 Hz, 1H), 7.11-7.10 (m, 3H), 6.47 (d, *J* = 1.2 Hz, 1H), 3.53 (d, *J* = 13.8 Hz, 1H), 3.23 (s, 3H), 3.17 (d, *J* = 13.8 Hz, 1H), 2.37 (s, 3H). <sup>13</sup>C NMR (150 MHz, CDCl<sub>3</sub>): δ 172.8, 164.0, 147.9, 147.4, 140.2, 140.1, 139.7, 137.5, 135.7, 131.5, 129.8, 129.72, 129.69, 129.0, 128.8, 128.7, 128.4, 128.2, 127.9, 127.8, 127.4, 127.2, 126.5, 124.8, 72.2, 51.3, 43.0, 20.1. IR (neat): 2922, 1711, 1492, 1445, 1258, 1024, 758, 748, 702, 694, 595, 568 cm<sup>-1</sup>. HRMS (ESI) calcd. for C<sub>34</sub>H<sub>30</sub>NO<sub>2</sub> [M+H]<sup>+</sup>: 484.2271, found 484.2272.

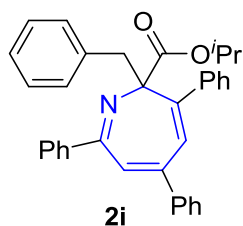

**Isopropyl 2-benzyl-3,5,7-triphenyl-2H-azepine-2-carboxylate (2i).** 0.3 mmol scale, under N<sub>2</sub> atmosphere, pyridinium salt **1i** (0.3 mmol, 175.6 mg), K<sub>2</sub>CO<sub>3</sub> (0.33 mmol, 45.6 mg) and 1,4-dioxane (3.0 mL) were stirred at 30 °C for 12 h. Then the reaction mixture was filtered through a short pad of silica gel, rinsed with ethyl acetate, and concentrated under vacuum. The residue was purified by column chromatography on silica gel (eluent: petroleum ether: ethyl acetate = 25:1) to afford the title product in 88% yield (131.4 mg) as

a white solid. M.p. = 152-153 °C. <sup>1</sup>H NMR (400 MHz, CDCl<sub>3</sub>): δ 7.90-7.87 (m, 2H), 7.56-7.54 (m, 2H), 7.50-7.42 (m, 5H), 7.40-7.30 (m, 9H), 7.24 (t, *J* = 6.8 Hz, 2H), 7.19-7.16 (m, 1H), 6.47 (d, *J* = 1.2 Hz, 1H), 4.51-4.44 (m, 1H), 3.50 (d, *J* = 12.8 Hz, 1H), 3.08 (d, *J* = 12.8 Hz, 1H), 0.86 (d, *J* = 6.0 Hz, 3H), 0.61 (d, *J* = 6.4 Hz, 3H). <sup>13</sup>C NMR (100 MHz, CDCl<sub>3</sub>): δ 171.2, 164.3, 147.8, 146.8, 140.2, 140.1, 139.9, 137.4, 130.8, 129.8, 129.7, 129.0, 128.8, 128.7, 128.6, 128.3, 127.7, 127.40, 127.35, 127.1, 126.4, 71.9, 68.3, 47.2, 21.6, 21.0 (*1 aromatic carbon signal is not observed due to signal overlap*). IR (neat): 2975, 1715, 1595, 1492, 1368, 1107, 1079, 878, 755, 740, 695, 601 cm<sup>-1</sup>. HRMS (ESI) calcd. for C<sub>35</sub>H<sub>32</sub>NO<sub>2</sub> [M+H]<sup>+</sup>: 498.2428, found 498.2428.

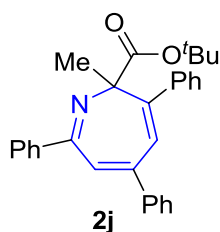

**tert-Butyl 2-methyl-3,5,7-triphenyl-2H-azepine-2-carboxylate (2j).** 0.3 mmol scale, under N<sub>2</sub> atmosphere, pyridinium salt **1j** (0.3 mmol, 157.0 mg), K<sub>2</sub>CO<sub>3</sub> (0.33 mmol, 45.6 mg) and 1,4-dioxane (3.0 mL) were stirred at 50 °C for 12 h. Then the reaction mixture was filtered through a short pad of silica gel, rinsed with ethyl acetate, and concentrated under vacuum. The residue was purified by column chromatography on silica gel (eluent: petroleum ether: ethyl acetate = 100:1 to 25:1, gradient) to afford the title product in 78% yield (101.9 mg) as a white solid. M.p. = 143-144 °C. <sup>1</sup>H NMR (400 MHz, CDCl<sub>3</sub>): δ 7.90-7.87 (m, 2H), 7.61-7.59 (m, 2H), 7.44-7.34 (m, 9H), 7.33-7.31 (m, 3H), 6.48 (d, *J* = 1.6 Hz, 1H), 1.76 (s, 3H), 1.26 (s, 9H). <sup>13</sup>C NMR (100 MHz, CDCl<sub>3</sub>): δ 173.3, 164.7, 148.1, 147.5, 140.5, 140.0, 139.8, 129.6, 129.5, 128.9, 128.6, 128.3, 127.60, 127.56, 127.30, 127.28, 127.2, 80.9, 68.4, 28.4, 27.6 (*1 aromatic carbon signal is not observed due to signal overlap*). IR (neat): 2975, 1725, 1445, 1368, 1233, 1158, 1121, 846, 766, 753, 698, 690, 568 cm<sup>-1</sup>. HRMS (ESI) calcd. for C<sub>30</sub>H<sub>30</sub>NO<sub>2</sub> [M+H]<sup>+</sup>: 436.2271, found 436.2271.

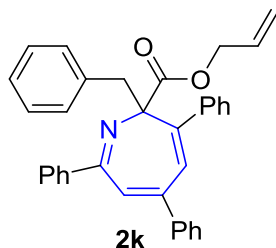

**Allyl 2-benzyl-3,5,7-triphenyl-2H-azepine-2-carboxylate (2k).** 0.3 mmol scale, under N<sub>2</sub> atmosphere, pyridinium salt **1k** (0.3 mmol, 175.0 mg), K<sub>2</sub>CO<sub>3</sub> (0.33 mmol, 45.6 mg) and 1,4-dioxane (3.0 mL) were stirred at 30 °C for 12 h. Then the reaction mixture was filtered through a short pad of silica gel, rinsed with ethyl acetate, and concentrated under vacuum. The residue was purified by column chromatography on silica gel (eluent: petroleum ether: ethyl acetate = 100:1 to 25:1, gradient) to afford the title product in 94% yield (139.8 mg) as a white solid. M.p. = 64-65 °C. <sup>1</sup>H NMR (400 MHz, CDCl<sub>3</sub>): δ 7.81-7.79 (m, 2H), 7.42-7.38 (m, 4H), 7.35-7.34 (m, 3H), 7.30-7.21 (m, 9H), 7.14 (t, *J* = 6.8 Hz, 2H), 7.10-7.06 (m, 1H), 6.38 (d, *J* = 1.2 Hz, 1H), 5.42-5.33 (m, 1H), 4.90-4.82 (m, 2H), 4.11 (dd, *J* = 13.2, 5.6 Hz, 1H), 3.89 (dd, *J* = 13.6, 6.0 Hz, 1H), 3.44 (d, *J* = 12.8 Hz, 1H), 3.03 (d, *J* = 12.8 Hz, 1H). <sup>13</sup>C NMR (100 MHz, CDCl<sub>3</sub>): δ 171.3, 164.3, 147.5, 147.1, 140.0, 139.8, 137.2, 131.7, 130.6, 129.8, 129.7, 128.9, 128.74, 128.72, 128.6, 128.3, 127.9, 127.7, 127.4, 127.1, 126.5, 117.9, 72.2, 65.1, 47.0 (2 aromatic carbon signals are not observed due to signal overlap). IR (neat): 3026, 1719, 1593, 1492, 1441, 1239, 1172, 1079, 755, 695, 599 cm<sup>-1</sup>. HRMS (ESI) calcd. for C<sub>35</sub>H<sub>30</sub>NO<sub>2</sub> [M+H]<sup>+</sup>: 496.2271, found 496.2270.

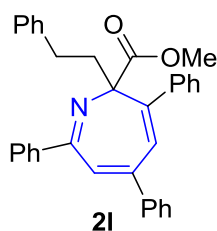

**Methyl 2-phenethyl-3,5,7-triphenyl-2H-azepine-2-carboxylate (2l).** 0.3 mmol scale, under N<sub>2</sub> atmosphere, pyridinium salt **1l** (0.3 mmol, 171.4 mg), K<sub>2</sub>CO<sub>3</sub> (0.33 mmol, 45.6 mg) and 1,4-dioxane (3.0 mL) were stirred at 50 °C for 12 h. Then the reaction mixture was filtered through a short pad of silica gel, rinsed with ethyl acetate, and concentrated under vacuum. The residue was purified by column chromatography on silica gel (eluent:

petroleum ether: ethyl acetate = 100:1) to afford the title product in 90% yield (130.6 mg) as a white solid. M.p. = 69-70 °C. <sup>1</sup>H NMR (600 MHz, CDCl<sub>3</sub>): δ 7.96-7.95 (m, 2H), 7.54 (d, *J* = 7.2 Hz, 2H), 7.46-7.45 (m, 3H), 7.43-7.41 (m, 5H), 7.39-7.36 (m, 1H), 7.33-7.30 (m, 3H), 7.19 (t, *J* = 7.8 Hz, 2H), 7.11 (t, *J* = 7.8 Hz, 1H), 7.01 (d, *J* = 7.8 Hz, 2H), 6.47 (s, 1H), 3.50 (s, 3H), 2.96 (td, *J* = 12.6, 4.2 Hz, 1H), 2.55 (td, *J* = 12.6, 4.2 Hz, 1H), 2.48 (td, *J* = 12.6, 3.6 Hz, 1H), 2.37 (td, *J* = 12.0, 4.2 Hz, 1H). <sup>13</sup>C NMR (150 MHz, CDCl<sub>3</sub>): δ 173.2, 164.3, 147.6, 147.3, 142.3, 140.1, 140.0, 139.5, 129.9, 129.6, 128.9, 128.82, 128.75, 128.5, 128.4, 128.2, 128.0, 127.7, 127.5, 127.2, 125.6, 70.7, 51.9, 42.0, 30.9 (*1 aromatic carbon signal is not observed due to signal overlap*). IR (neat): 3023, 1731, 1596, 1493, 1444, 1224, 1169, 1072, 876, 755, 695 cm<sup>-1</sup>. HRMS (ESI) calcd. for C<sub>34</sub>H<sub>30</sub>NO<sub>2</sub> [M+H]<sup>+</sup>: 484.2271, found 484.2273.

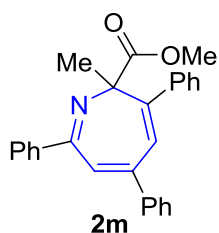

**Methyl 2-methyl-3,5,7-triphenyl-2H-azepine-2-carboxylate (2m).** 0.3 mmol scale, under N<sub>2</sub> atmosphere, pyridinium salt **1m** (0.3 mmol, 144.4 mg), K<sub>2</sub>CO<sub>3</sub> (0.33 mmol, 45.6 mg) and 1,4-dioxane (3.0 mL) were stirred at 30 °C for 24 h. Then the reaction mixture was filtered through a short pad of silica gel, rinsed with ethyl acetate, and concentrated under vacuum. The residue was purified by column chromatography on silica gel (eluent: petroleum ether: ethyl acetate = 100:1 to 25:1, gradient) to afford the title product in 85% yield (100.5 mg) as a white solid. M.p. = 155-156 °C. <sup>1</sup>H NMR (600 MHz, CDCl<sub>3</sub>): δ 7.92-7.90 (m, 2H), 7.54 (d, *J* = 7.8 Hz, 2H), 7.44-7.43 (m, 3H), 7.43-7.37 (m, 6H), 7.35-7.31 (m, 3H), 6.49 (d, *J* = 1.2 Hz, 1H), 3.48 (s, 3H), 1.79 (s, 3H). <sup>13</sup>C NMR (150 MHz, CDCl<sub>3</sub>): δ 175.0, 164.4, 148.2, 147.5, 140.1, 140.0, 139.3, 129.8, 129.6, 128.81, 128.76, 128.7, 128.3, 127.8, 127.6, 127.42, 127.38, 127.2, 68.1, 52.0, 28.3. IR (neat): 3050, 1729, 1442, 1368, 1227, 1123, 972, 880, 762, 698, 680 cm<sup>-1</sup>. HRMS (ESI) calcd. for C<sub>27</sub>H<sub>24</sub>NO<sub>2</sub> [M+H]<sup>+</sup>: 394.1802, found 394.1801.

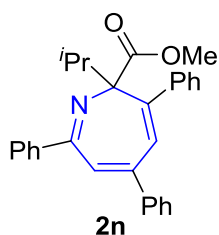

**Methyl 2-isopropyl-3,5,7-triphenyl-2H-azepine-2-carboxylate (2n).** 0.3 mmol scale, under N<sub>2</sub> atmosphere, pyridinium salt **1n** (0.3 mmol, 152.8 mg), K<sub>2</sub>CO<sub>3</sub> (0.33 mmol, 45.6 mg) and 1,4-dioxane (3.0 mL) were stirred at 30 °C for 24 h. Then the reaction mixture was filtered through a short pad of silica gel, rinsed with ethyl acetate, and concentrated under vacuum. The residue was purified by column chromatography on silica gel (eluent: petroleum ether: ethyl acetate = 50:1) to afford the title product in 95% yield (120.1 mg) as a white solid. M.p. = 161-162 °C. <sup>1</sup>H NMR (400 MHz, CDCl<sub>3</sub>): δ 7.95-7.93 (m, 2H), 7.57-7.55 (m, 2H), 7.45-7.37 (m, 9H), 7.35-7.27 (m, 3H), 6.44 (d, *J* = 1.2 Hz, 1H), 3.41 (s, 3H), 2.95-2.88 (m, 1H), 1.19 (d, *J* = 6.8 Hz, 3H), 0.73 (d, *J* = 6.8 Hz, 3H). <sup>13</sup>C NMR (100 MHz, CDCl<sub>3</sub>): δ 171.7, 163.2, 147.6, 147.2, 140.7, 140.0, 139.7, 129.74, 129.67, 129.5, 128.81, 128.77, 128.7, 128.3, 127.8, 127.6, 127.3, 126.9, 74.4, 51.1, 34.3, 18.13, 18.11. IR (neat): 2957, 1732, 1489, 1444, 1325, 1204, 1136, 1036, 872, 768, 707, 695 cm<sup>-1</sup>. HRMS (ESI) calcd. for C<sub>29</sub>H<sub>28</sub>NO<sub>2</sub> [M+H]<sup>+</sup>: 422.2115, found 422.2116.

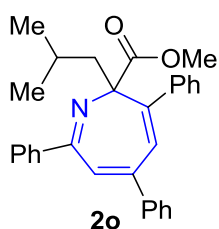

**Methyl 2-isobutyl-3,5,7-triphenyl-2H-azepine-2-carboxylate (2o).** 0.3 mmol scale, under N<sub>2</sub> atmosphere, pyridinium salt **1o** (0.3 mmol, 157.0 mg), K<sub>2</sub>CO<sub>3</sub> (0.33 mmol, 45.6 mg) and 1,4-dioxane (3.0 mL) were stirred at 30 °C for 24 h. Then the reaction mixture was filtered through a short pad of silica gel, rinsed with ethyl acetate, and concentrated under vacuum. The residue was purified by column chromatography on silica gel (eluent: petroleum ether: ethyl acetate = 100:1 to 25:1, gradient) to afford the title product in 97% yield (126.1 mg) as a white solid. M.p. = 148-149 °C. <sup>1</sup>H NMR (400 MHz, CDCl<sub>3</sub>): δ 7.93-7.90 (m, 2H), 7.54-7.52 (m, 2H), 7.46-7.35 (m, 9H), 7.33-7.26 (m, 3H), 6.40 (d, *J* =



1.2 Hz, 1H), 3.46 (s, 3H), 2.09 (dd,  $J = 14.0, 6.4$  Hz, 1H), 1.98 (dd,  $J = 14.0, 4.4$  Hz, 1H), 1.92-1.90 (m, 1H), 1.03 (d,  $J = 6.8$  Hz, 3H), 0.71 (d,  $J = 6.4$  Hz, 3H).  $^{13}\text{C}$  NMR (100 MHz,  $\text{CDCl}_3$ ):  $\delta$  173.1, 163.8, 147.6, 147.2, 140.13, 140.11, 139.6, 129.8, 129.7, 128.8, 128.7, 128.4, 128.3, 127.9, 127.5, 127.2, 127.1, 71.0, 51.6, 48.9, 24.6, 24.4, 24.3 (*1 aromatic carbon signal is not observed due to signal overlap*). IR (neat): 2952, 1733, 1594, 1489, 1445, 1366, 1205, 1132, 1029, 876, 756, 695  $\text{cm}^{-1}$ . HRMS (ESI) calcd. for  $\text{C}_{30}\text{H}_{30}\text{NO}_2$   $[\text{M}+\text{H}]^+$ : 436.2271, found 436.2271.

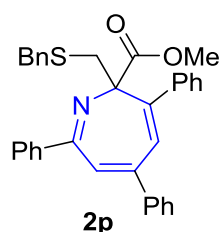

**Methyl 2-((benzylthio)methyl)-3,5,7-triphenyl-2H-azepine-2-carboxylate (2p).** 0.3 mmol scale, under  $\text{N}_2$  atmosphere, pyridinium salt **1p** (0.3 mmol, 181.0 mg),  $\text{K}_2\text{CO}_3$  (0.33 mmol, 45.6 mg) and 1,4-dioxane (3.0 mL) were stirred at 20  $^\circ\text{C}$  for 12 h. Then the reaction mixture was filtered through a short pad of silica gel, rinsed with ethyl acetate, and concentrated under vacuum. The residue was purified by column chromatography on silica gel (eluent: petroleum ether: ethyl acetate = 25:1) to afford the title product in 63% yield (97.4 mg) as a white solid. M.p. = 64-65  $^\circ\text{C}$ .  $^1\text{H}$  NMR (400 MHz,  $\text{CDCl}_3$ ):  $\delta$  7.85-7.83 (m, 2H), 7.43 (d,  $J = 6.4$  Hz, 2H), 7.35-7.26 (m, 9H), 7.23-7.21 (m, 3H), 7.17-7.07 (m, 5H), 6.35 (d,  $J = 1.2$  Hz, 1H), 3.59 (s, 2H), 3.39 (s, 3H), 3.25 (d,  $J = 12.8$  Hz, 1H), 3.01 (d,  $J = 12.8$  Hz, 1H).  $^{13}\text{C}$  NMR (100 MHz,  $\text{CDCl}_3$ ):  $\delta$  171.8, 164.5, 147.6, 146.4, 140.0, 139.4, 139.3, 138.5, 129.9, 129.7, 129.0, 128.87, 128.85, 128.7, 128.33, 128.26, 128.0, 127.7, 127.5, 127.1, 126.7, 71.9, 52.0, 41.9, 37.6 (*1 aromatic carbon signal is not observed due to signal overlap*). IR (neat): 3059, 1732, 1619, 1594, 1549, 1493, 1444, 1027, 760, 694  $\text{cm}^{-1}$ . HRMS (ESI) calcd. for  $\text{C}_{34}\text{H}_{30}\text{NO}_2\text{S}$   $[\text{M}+\text{H}]^+$ : 516.1992, found 516.1992.

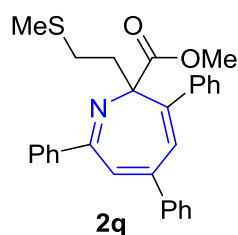

**Methyl 2-(2-(methylthio)ethyl)-3,5,7-triphenyl-2H-azepine-2-carboxylate (2q).** 0.3 mmol scale, under N<sub>2</sub> atmosphere, pyridinium salt **1q** (0.3 mmol, 162.4 mg), K<sub>2</sub>CO<sub>3</sub> (0.33 mmol, 45.6 mg) and 1,4-dioxane (3.0 mL) were stirred at 30 °C for 12 h. Then the reaction mixture was filtered through a short pad of silica gel, rinsed with ethyl acetate, and concentrated under vacuum. The residue was purified by column chromatography on silica gel (eluent: petroleum ether: ethyl acetate = 25:1) to afford the title product in 89% yield (121.1 mg) as a white solid. M.p. = 84-85 °C. <sup>1</sup>H NMR (600 MHz, CDCl<sub>3</sub>): δ 7.93-7.91 (m, 2H), 7.53-7.51 (m, 2H), 7.46-7.44 (m, 3H), 7.42-7.36 (m, 6H), 7.35-7.31 (m, 3H), 6.44 (d, *J* = 1.2 Hz, 1H), 3.50 (s, 3H), 2.81 (dd, *J* = 12.0, 8.4 Hz, 1H), 2.48-2.42 (m, 2H), 2.32-2.29 (m, 1H), 1.95 (s, 3H). <sup>13</sup>C NMR (150 MHz, CDCl<sub>3</sub>): δ 172.8, 164.4, 147.7, 147.0, 140.0, 139.7, 139.3, 129.9, 129.5, 128.9, 128.8, 128.7, 128.4, 128.3, 127.9, 127.8, 127.6, 127.1, 70.4, 52.0, 40.1, 29.1, 15.4. IR (neat): 2970, 1730, 1594, 1491, 1444, 1217, 1165, 1073, 876, 756, 695 cm<sup>-1</sup>. HRMS (ESI) calcd. for C<sub>29</sub>H<sub>28</sub>NO<sub>2</sub>S [M+H]<sup>+</sup>: 454.1835, found 454.1835.

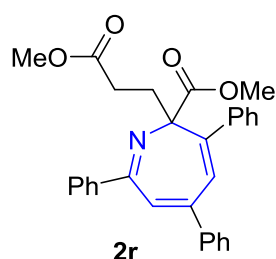

**Methyl 2-(3-methoxy-3-oxopropyl)-3,5,7-triphenyl-2H-azepine-2-carboxylate (2r).** 0.3 mmol scale, under N<sub>2</sub> atmosphere, pyridinium salt **1r** (0.3 mmol, 166.0 mg), K<sub>2</sub>CO<sub>3</sub> (0.33 mmol, 45.6 mg) and 1,4-dioxane (3.0 mL) were stirred at 30 °C for 12 h. Then the reaction mixture was filtered through a short pad of silica gel, rinsed with ethyl acetate, and concentrated under vacuum. The residue was purified by column chromatography on silica gel (eluent: petroleum ether: ethyl acetate = 10:1) to afford the title product in 93% yield

(130.2 mg) as a white solid. M.p. = 63-64 °C. <sup>1</sup>H NMR (600 MHz, CDCl<sub>3</sub>): δ 7.92-7.90 (m, 2H), 7.51 (d, *J* = 7.2 Hz, 2H), 7.44-7.43 (m, 3H), 7.41-7.38 (m, 5H), 7.36-7.29 (m, 4H), 6.44 (d, *J* = 1.8 Hz, 1H), 3.60 (s, 3H), 3.48 (s, 3H), 2.79-2.74 (m, 1H), 2.55-2.44 (m, 2H), 2.37-2.32 (m, 1H). <sup>13</sup>C NMR (150 MHz, CDCl<sub>3</sub>): δ 173.9, 172.7, 164.5, 147.6, 147.1, 139.9, 139.5, 139.2, 129.9, 129.5, 128.8, 128.73, 128.67, 128.3, 128.2, 127.9, 127.7, 127.5, 127.0, 69.5, 51.9, 51.4, 34.8, 29.2. IR (neat): 2948, 1732, 1594, 1491, 1436, 1368, 1220, 1170, 1072, 874, 757, 695 cm<sup>-1</sup>. HRMS (ESI) calcd. for C<sub>30</sub>H<sub>28</sub>NO<sub>4</sub> [M+H]<sup>+</sup>: 466.2013, found 466.2013.

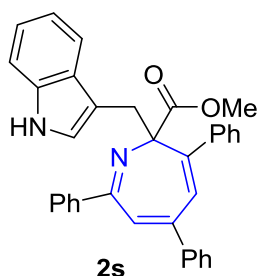

**Methyl 2-((1*H*-indol-3-yl)methyl)-3,5,7-triphenyl-2*H*-azepine-2-carboxylate (2s).** 0.3 mmol scale, under N<sub>2</sub> atmosphere, pyridinium salt **1s** (0.3 mmol, 178.9 mg), K<sub>2</sub>CO<sub>3</sub> (0.33 mmol, 45.6 mg) and 1,4-dioxane (3.0 mL) were stirred at 30 °C for 12 h. Then the reaction mixture was filtered through a short pad of silica gel, rinsed with ethyl acetate, and concentrated under vacuum. The residue was purified by column chromatography on silica gel (eluent: petroleum ether: ethyl acetate = 25:1) to afford the title product in 60% yield (91.6 mg) as a yellow solid. M.p. = 108-109 °C. <sup>1</sup>H NMR (600 MHz, CDCl<sub>3</sub>): δ 8.04 (s, 1H), 7.91-7.90 (m, 2H), 7.56-7.50 (m, 5H), 7.42-7.31 (m, 10H), 7.15-7.14 (m, 1H), 7.07 (d, *J* = 1.2 Hz, 1H), 7.05-7.01 (m, 2H), 6.47 (s, 1H), 3.60 (d, *J* = 14.4 Hz, 1H), 3.47 (d, *J* = 14.4 Hz, 1H), 3.06 (s, 3H). <sup>13</sup>C NMR (100 MHz, CDCl<sub>3</sub>): δ 172.7, 164.2, 147.8, 147.2, 140.22, 140.19, 139.6, 135.6, 129.8, 129.7, 128.9, 128.7, 128.5, 128.4, 128.3, 128.2, 127.8, 127.4, 127.2, 123.8, 121.3, 119.1, 118.7, 110.82, 110.75, 71.6, 51.6, 36.5 (*1 aromatic carbon signal is not observed due to signal overlap*). IR (neat): 3380, 2921, 1721, 1572, 1491, 1338, 1074, 1006, 876, 756, 740, 695 cm<sup>-1</sup>. HRMS (ESI) calcd. for C<sub>35</sub>H<sub>29</sub>N<sub>2</sub>O<sub>2</sub> [M+H]<sup>+</sup>: 509.2224, found 509.2224.

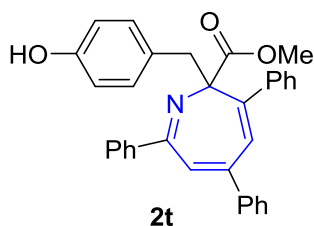

**Methyl 2-(4-hydroxybenzyl)-3,5,7-triphenyl-2H-azepine-2-carboxylate (2t).** 0.3 mmol scale, under N<sub>2</sub> atmosphere, pyridinium salt **1t** (0.3 mmol, 172.0 mg), K<sub>2</sub>CO<sub>3</sub> (0.33 mmol, 45.6 mg) and dimethylacetamide (3.0 mL) were stirred at 30 °C for 12 h. Then the reaction mixture was quenched with water, extracted with ethyl acetate, and the organic layer was washed with water and brine, and dried over anhydrous Na<sub>2</sub>SO<sub>4</sub>. The resulting filtrate was concentrated under vacuum. The residue was purified by column chromatography on silica gel (eluent: petroleum ether: ethyl acetate = 5:1) to afford the title product in 87% yield (126.2 mg) as a white solid. M.p. = 113-114 °C. <sup>1</sup>H NMR (400 MHz, CDCl<sub>3</sub>): δ 7.91-7.88 (m, 2H), 7.52-7.50 (m, 2H), 7.45-7.41 (m, 6H), 7.40 (s, 1H), 7.38-7.30 (m, 6H), 7.09 (d, *J* = 8.4 Hz, 2H), 6.58 (d, *J* = 8.4 Hz, 2H), 6.47 (d, *J* = 1.2 Hz, 1H), 3.44 (d, *J* = 13.6 Hz, 1H), 3.26 (s, 3H), 3.04 (d, *J* = 13.2 Hz, 1H). <sup>13</sup>C NMR (150 MHz, CDCl<sub>3</sub>): δ 172.6, 164.7, 154.7, 147.6, 147.4, 140.0, 139.9, 139.6, 131.4, 129.9, 129.8, 129.0, 128.8, 128.74, 128.70, 128.6, 128.3, 128.1, 127.7, 127.4, 127.1, 114.6, 72.3, 51.6, 46.1. IR (neat): 3400, 3023, 1723, 1594, 1511, 1442, 1172, 1072, 831, 756, 695 cm<sup>-1</sup>. HRMS (ESI) calcd. for C<sub>33</sub>H<sub>28</sub>NO<sub>3</sub> [M+H]<sup>+</sup>: 486.2064, found 486.2064.

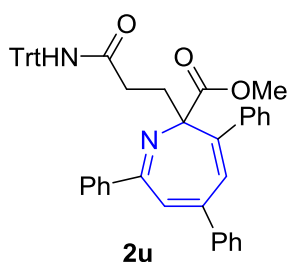

**Methyl 2-(3-oxo-3-(tritylamino)propyl)-3,5,7-triphenyl-2H-azepine-2-carboxylate (2u).** 0.3 mmol scale, under N<sub>2</sub> atmosphere, pyridinium salt **1u** (0.3 mmol, 234.2 mg), K<sub>2</sub>CO<sub>3</sub> (0.33 mmol, 45.6 mg) and 1,4-dioxane (3.0 mL) were stirred at 30 °C for 12 h. Then the reaction mixture was filtered through a short pad of silica gel, rinsed with ethyl acetate, and concentrated under vacuum. The residue was purified by column chromatography on

silica gel (eluent: petroleum ether: ethyl acetate = 5:1) to afford the title product in 85% yield (176.1 mg) as a white solid. M.p. = 89-90 °C. <sup>1</sup>H NMR (400 MHz, CDCl<sub>3</sub>): δ 7.88-7.86 (m, 2H), 7.53-7.51 (m, 2H), 7.43-7.34 (m, 7H), 7.27-7.26 (m, 6H), 7.21-7.17 (m, 9H), 7.12-7.07 (m, 6H), 6.47 (d, *J* = 1.2 Hz, 1H), 3.42 (s, 3H), 2.90-2.80 (m, 1H), 2.47-2.33 (m, 3H). <sup>13</sup>C NMR (100 MHz, CDCl<sub>3</sub>): δ 172.8, 172.1, 165.4, 148.1, 147.1, 144.8, 139.8, 139.5, 139.1, 130.1, 129.5, 128.95, 128.91, 128.74, 128.67, 128.3, 128.1, 128.0, 127.8, 127.7, 127.6, 127.1, 126.7, 70.2, 69.6, 52.2, 35.4, 32.5. IR (neat): 3288, 2961, 1728, 1487, 1445, 1261, 1219, 1082, 1019, 876, 799, 756, 696 cm<sup>-1</sup>. HRMS (ESI) calcd. for C<sub>48</sub>H<sub>41</sub>N<sub>2</sub>O<sub>3</sub> [M+H]<sup>+</sup>: 693.3112, found 693.3111.

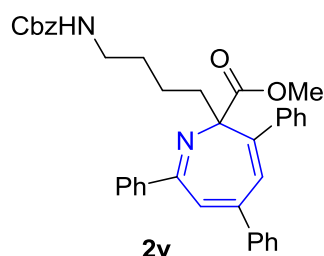

**Methyl 2-(4-(((benzyloxy)carbonyl)amino)butyl)-3,5,7-triphenyl-2H-azepine-2-carboxylate (2v).** 0.3 mmol scale, under N<sub>2</sub> atmosphere, pyridinium salt **1v** (0.3 mmol, 201.8 mg), K<sub>2</sub>CO<sub>3</sub> (0.33 mmol, 45.6 mg) and 1,4-dioxane (3.0 mL) were stirred at 50 °C for 12 h. Then the reaction mixture was filtered through a short pad of silica gel, rinsed with ethyl acetate, and concentrated under vacuum. The residue was purified by column chromatography on silica gel (eluent: petroleum ether: ethyl acetate = 100:1 to 5:1, gradient) to afford the title product in 84% yield (147.9 mg) as a white solid. M.p. = 124-125 °C. <sup>1</sup>H NMR (600 MHz, CDCl<sub>3</sub>): δ 7.89-7.88 (m, 2H), 7.52 (d, *J* = 7.2 Hz, 2H), 7.44-7.40 (m, 5H), 7.39-7.36 (m, 4H), 7.34-7.28 (m, 8H), 6.44 (d, *J* = 0.6 Hz, 1H), 5.07 (s, 2H), 4.72 (s, 1H), 3.47 (s, 3H), 3.11-3.06 (m, 2H), 2.15-2.10 (m, 1H), 2.06-2.01 (m, 1H), 1.69-1.68 (m, 1H), 1.44-1.40 (m, 1H), 1.39-1.34 (m, 1H), 1.23-1.19 (m, 1H). <sup>13</sup>C NMR (150 MHz, CDCl<sub>3</sub>): δ 173.1, 164.6, 156.3, 147.6, 147.2, 140.1, 139.9, 139.5, 136.7, 129.8, 129.6, 128.8, 128.7, 128.5, 128.4, 128.3, 128.1, 128.01, 127.98, 127.7, 127.4, 127.1, 70.7, 66.4, 51.8, 40.8, 39.8, 29.9, 21.4 (*1 aromatic carbon signal is not observed due to signal overlap*). IR (neat): 3465, 2938, 1719, 1489, 1445, 1242, 1193, 1174, 1016, 756, 694 cm<sup>-1</sup>.

HRMS (ESI) calcd. for  $C_{38}H_{37}N_2O_4$   $[M+H]^+$ : 585.2748, found 585.2749.

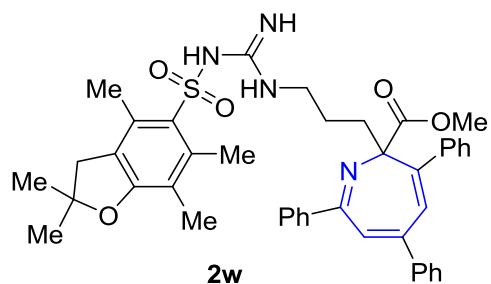

**Methyl 2-(3-(3-((2,2,4,6,7-pentamethyl-2,3-dihydrobenzofuran-5-yl)sulfonyl)guanidino)propyl)-3,5,7-triphenyl-2H-azepine-2-carboxylate (2w).** 0.3 mmol scale, under  $N_2$  atmosphere, pyridinium salt **1w** (0.3 mmol, 245.6 mg),  $K_2CO_3$  (0.33 mmol, 45.6 mg) and 1,4-dioxane (3.0 mL) were stirred at 30 °C for 12 h. Then the reaction mixture was filtered through a short pad of silica gel, rinsed with ethyl acetate, and concentrated under vacuum. The residue was purified by column chromatography on silica gel (eluent: petroleum ether: acetone = 3:1) to afford the title product in 64% yield (139.9 mg) as a yellow solid. M.p. = 135-136 °C.  $^1H$  NMR (400 MHz,  $CDCl_3$ ):  $\delta$  7.82-7.79 (m, 2H), 7.50 (dd,  $J$  = 8.0, 1.6 Hz, 2H), 7.43-7.36 (m, 6H), 7.35 (d,  $J$  = 1.2 Hz, 1H), 7.30 (s, 5H), 6.44 (d,  $J$  = 1.2 Hz, 1H), 6.17 (br, 1H), 6.03 (br, 2H), 3.45 (s, 3H), 3.17-3.10 (m, 1H), 3.05-3.00 (m, 1H), 2.92 (s, 2H), 2.54 (s, 3H), 2.48 (s, 3H), 2.15-2.07 (m, 4H), 1.95-1.91 (m, 1H), 1.77-1.74 (m, 1H), 1.49-1.43 (m, 7H).  $^{13}C$  NMR (100 MHz,  $CDCl_3$ ):  $\delta$  172.8, 165.4, 158.5, 156.0, 147.6, 147.0, 139.7, 139.5, 139.1, 138.2, 133.2, 132.2, 130.0, 129.5, 129.0, 128.74, 128.65, 128.4, 128.2, 128.1, 127.8, 127.6, 127.0, 124.4, 117.2, 86.1, 70.6, 52.0, 43.1, 41.4, 36.7, 28.5, 24.3, 19.2, 17.8, 12.4. IR (neat): 3440, 3338, 2970, 1728, 1549, 1446, 1368, 1232, 1146, 1090, 756, 697, 665  $cm^{-1}$ . HRMS (ESI) calcd. for  $C_{43}H_{47}N_4O_5S$   $[M+H]^+$ : 731.3262, found 731.3261.

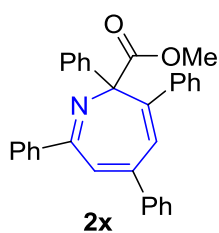

**Methyl 2,3,5,7-tetraphenyl-2H-azepine-2-carboxylate (2x).** 0.3 mmol scale, under  $N_2$

atmosphere, pyridinium salt **1x** (0.3 mmol, 163.0 mg), K<sub>2</sub>CO<sub>3</sub> (0.33 mmol, 45.6 mg) and 1,4-dioxane (3.0 mL) were stirred at 80 °C for 12 h. Then the reaction mixture was filtered through a short pad of silica gel, rinsed with ethyl acetate, and concentrated under vacuum. The residue was purified by column chromatography on silica gel (eluent: petroleum ether: ethyl acetate = 100:1 to 25:1, gradient) to afford the title product in 71% yield (97.4 mg) as a yellow solid. M.p. = 104-105 °C. <sup>1</sup>H NMR (400 MHz, CDCl<sub>3</sub>): δ 7.83-7.80 (m, 2H), 7.55-7.53 (m, 2H), 7.43-7.36 (m, 4H), 7.33-7.29 (m, 4H), 7.23-7.20 (m, 2H), 7.18-7.13 (m, 6H), 6.77 (d, *J* = 1.6 Hz, 1H), 5.60 (d, *J* = 0.8 Hz, 1H) 3.44 (s, 3H). <sup>13</sup>C NMR (100 MHz, CDCl<sub>3</sub>): δ 169.4, 148.6, 141.8, 140.9, 139.55, 139.46, 137.0, 131.1, 130.1, 130.0, 129.6, 128.9, 128.6, 128.1, 127.9, 127.8, 127.6, 127.5, 127.1, 126.65, 126.63, 126.5, 52.5, 51.5. IR (neat): 3019, 1736, 1491, 1444, 1261, 1176, 1014, 910, 779, 764, 692, 673 cm<sup>-1</sup>. HRMS (ESI) calcd. for C<sub>32</sub>H<sub>26</sub>NO<sub>2</sub> [M+H]<sup>+</sup>: 456.1958, found 496.1957.

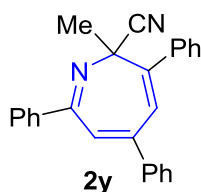

**2-Methyl-3,5,7-triphenyl-2H-azepine-2-carbonitrile (2y).** 0.3 mmol scale, under N<sub>2</sub> atmosphere, pyridinium salt **1y** (0.3 mmol, 134.5 mg), K<sub>2</sub>CO<sub>3</sub> (0.33 mmol, 45.6 mg) and 1,4-dioxane (3.0 mL) were stirred at 30 °C for 12 h. Then the reaction mixture was filtered through a short pad of silica gel, rinsed with ethyl acetate, and concentrated under vacuum. The residue was purified by column chromatography on silica gel (eluent: petroleum ether: ethyl acetate = 25:1) to afford the title product in 90% yield (97.3 mg) as a green solid. M.p. = 69-70 °C. <sup>1</sup>H NMR (400 MHz, CDCl<sub>3</sub>): δ 7.67-7.65 (m, 2H), 7.45-7.38 (m, 6H), 7.37-7.26 (m, 7H), 6.72 (s, 1H), 6.12 (d, *J* = 0.8 Hz, 1H), 2.35 (s, 3H). <sup>13</sup>C NMR (100 MHz, CDCl<sub>3</sub>): δ 147.8, 141.2, 137.4, 135.1, 134.2, 130.5, 129.6, 129.0, 128.8, 128.5, 128.3, 127.8, 127.4, 127.1, 127.0, 119.6, 114.2, 35.6, 21.6 (*1 aromatic carbon signal is not observed due to signal overlap*). IR (neat): 2923, 1732, 1568, 1445, 1220, 1088, 1002, 759, 695, 667 cm<sup>-1</sup>. HRMS (ESI) calcd. for C<sub>26</sub>H<sub>21</sub>N<sub>2</sub> [M+H]<sup>+</sup>: 361.1699, found 361.1699.

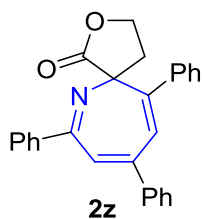

**7,9,11-Triphenyl-2-oxa-6-azaspiro[4.6]undeca-6,8,10-trien-1-one (2z).** 0.3 mmol scale, under N<sub>2</sub> atmosphere, pyridinium salt **1z** (0.3 mmol, 143.8 mg), K<sub>2</sub>CO<sub>3</sub> (0.33 mmol, 45.6 mg) and 1,4-dioxane (3.0 mL) were stirred at 30 °C for 24 h. Then the reaction mixture was filtered through a short pad of silica gel, rinsed with ethyl acetate, and concentrated under vacuum. The residue was purified by column chromatography on silica gel (eluent: petroleum ether: ethyl acetate: dichloromethane = 20:1:5) to afford the title product in 83% yield (97.4 mg) as a white solid. M.p. = 168-169 °C. <sup>1</sup>H NMR (600 MHz, CDCl<sub>3</sub>): δ 7.82 (d, *J* = 6.6 Hz, 2H), 7.53 (d, *J* = 7.2 Hz, 2H), 7.43 (s, 1H), 7.40-7.33 (m, 6H), 7.24 (s, 5H), 6.59 (s, 1H), 4.36-4.32 (m, 1H), 4.28-4.24 (m, 1H), 2.53-2.49 (m, 1H), 2.22-2.17 (m, 1H). <sup>13</sup>C NMR (150 MHz, CDCl<sub>3</sub>): δ 175.5, 164.4, 149.2, 144.2, 140.1, 139.3, 139.2, 130.1, 129.2, 129.0, 128.94, 128.92, 128.8, 128.4, 128.3, 128.2, 126.9, 126.8, 69.0, 65.1, 34.4. IR (neat): 3021, 1776, 1444, 1376, 1214, 1178, 1033, 963, 870, 756, 715, 695 cm<sup>-1</sup>. HRMS (ESI) calcd. for C<sub>27</sub>H<sub>22</sub>NO<sub>2</sub> [M+H]<sup>+</sup>: 392.1645, found 392.1644.

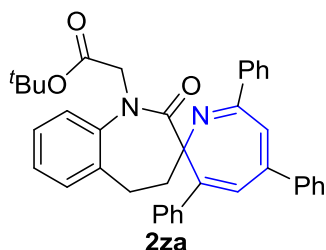

**tert-Butyl 2-(2'-oxo-3,5,7-triphenyl-4',5'-dihydrospiro[azepine-2,3'-benzo[*b*]azepin]-1'(2'*H*)-yl)acetate (2za).** 0.3 mmol scale, under N<sub>2</sub> atmosphere, pyridinium salt **1za** (0.3 mmol, 200.6 mg), K<sub>2</sub>CO<sub>3</sub> (0.33 mmol, 45.6 mg) and 1,4-dioxane (3.0 mL) were stirred at 30 °C for 24 h. Then the reaction mixture was filtered through a short pad of silica gel, rinsed with ethyl acetate, and concentrated under vacuum. The residue was purified by column chromatography on silica gel (eluent: petroleum ether: ethyl acetate = 100:1 to petroleum ether: ethyl acetate: dichloromethane = 25:1:4, gradient) to afford the title



product in 83% yield (145.2 mg) as a white solid. M.p. = 224-225 °C. <sup>1</sup>H NMR (600 MHz, CDCl<sub>3</sub>): δ 7.66 (d, *J* = 7.2 Hz, 2H), 7.40 (t, *J* = 7.2 Hz, 2H), 7.36-7.33 (m, 5H), 7.30-7.25 (m, 4H), 7.20-7.16 (m, 3H), 7.03-6.99 (m, 3H), 6.79 (d, *J* = 7.8 Hz, 1H), 6.52 (d, *J* = 1.2 Hz, 1H), 4.28 (d, *J* = 17.4 Hz, 1H), 4.01 (d, *J* = 17.4 Hz, 1H), 3.29-3.25 (m, 1H), 2.92-2.87 (m, 1H), 2.69 (dd, *J* = 13.8, 7.2 Hz, 1H), 2.46 (dd, *J* = 13.2, 7.8 Hz, 1H), 1.22 (s, 9H). <sup>13</sup>C NMR (150 MHz, CDCl<sub>3</sub>): δ 173.6, 168.0, 161.2, 149.2, 146.6, 143.4, 140.5, 140.0, 139.0, 136.9, 129.7, 129.5, 129.4, 128.9, 128.49, 128.45, 128.3, 128.1, 127.53, 127.50, 127.0, 126.0, 125.7, 122.1, 81.3, 71.5, 52.1, 44.5, 29.2, 27.7 (*1 aromatic carbon signal is not observed due to signal overlap*). IR (neat): 2974, 1740, 1652, 1596, 1493, 1365, 1272, 1221, 1156, 1025, 870, 755, 703, 695 cm<sup>-1</sup>. HRMS (ESI) calcd. for C<sub>39</sub>H<sub>37</sub>N<sub>2</sub>O<sub>3</sub> [M+H]<sup>+</sup>: 581.2799, found 581.2799.

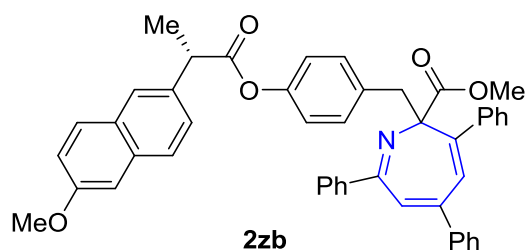

**Methyl 2-(4-(((S)-2-(6-methoxynaphthalen-2-yl)propanoyl)oxy)benzyl)-3,5,7-triphenyl-2H-azepine-2-carboxylate (2zb).** 0.3 mmol scale, under N<sub>2</sub> atmosphere, pyridinium salt **1zb** (0.3 mmol, 235.7 mg), K<sub>2</sub>CO<sub>3</sub> (0.33 mmol, 45.6 mg) and 1,4-dioxane (3.0 mL) were stirred at 30 °C for 12 h. Then the reaction mixture was filtered through a short pad of silica gel, rinsed with ethyl acetate, and concentrated under vacuum. The residue was purified by column chromatography on silica gel (eluent: petroleum ether: ethyl acetate = 25:1 to 5:1, gradient) to afford a mixture of diastereoisomers (d.r. 1:1) in 89% yield (187.0 mg) as a white solid. M.p. = 95-96 °C. <sup>1</sup>H NMR (400 MHz, CDCl<sub>3</sub>): δ 7.88-7.85 (m, 2H), 7.74-7.70 (m, 3H), 7.51-7.41 (m, 8H), 7.40-7.31 (m, 7H), 7.26 (d, *J* = 8.4 Hz, 2H), 7.15-7.11 (m, 2H), 6.89 (d, *J* = 8.4 Hz, 2H), 6.45 (d, *J* = 1.2 Hz, 1H), 4.05 (q, *J* = 7.2 Hz, 1H), 3.878 (s, 1.5H), 3.876 (s, 1.5H), 3.48 (d, *J* = 13.2 Hz, 1H), 3.17 (s, 1.5H), 3.16 (s, 1.5H), 3.08 (d, *J* = 13.2 Hz, 1H), 1.66 (d, *J* = 7.2 Hz, 3H). <sup>13</sup>C NMR (150 MHz, CDCl<sub>3</sub>): δ 173.1, 172.4, (164.20, 164.18), 157.7, 149.6, 147.4, 140.0, 139.9, 139.5, (135.18, 135.17),

134.8, 133.7, 131.3, 129.80, 129.76, 129.3, 128.93, 128.86, 128.8, 128.7, 128.4, 128.3, 128.0, 127.8, 127.5, 127.3, 127.1, 126.14, 126.08, 120.3, 119.0, 105.5, 72.2, 55.2, 51.3, 46.3, 45.5, 18.4 (*1 aromatic carbon signal is not observed due to signal overlap*). IR (neat): 2935, 1751, 1604, 1504, 1196, 1165, 1130, 1071, 1030, 852, 756, 730, 696 cm<sup>-1</sup>. HRMS (ESI) calcd. for C<sub>47</sub>H<sub>40</sub>NO<sub>5</sub> [M+H]<sup>+</sup>: 698.2901, found 698.2902.

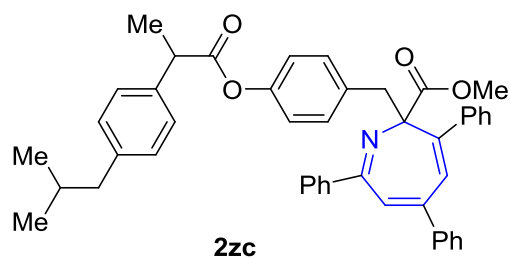

**Methyl 2-(4-((2-(4-isobutylphenyl)propanoyl)oxy)benzyl)-3,5,7-triphenyl-2H-azepine-2-carboxylate (2zc).** 0.3 mmol scale, under N<sub>2</sub> atmosphere, pyridinium salt **1zc** (0.3 mmol, 228.5 mg), K<sub>2</sub>CO<sub>3</sub> (0.33 mmol, 45.6 mg) and 1,4-dioxane (3.0 mL) were stirred at 30 °C for 12 h. Then the reaction mixture was filtered through a short pad of silica gel, rinsed with ethyl acetate, and concentrated under vacuum. The residue was purified by column chromatography on silica gel (eluent: petroleum ether: ethyl acetate = 25:1) to afford the title product in 85% yield (171.8 mg) as a white solid. M.p. = 74-75 °C. <sup>1</sup>H NMR (400 MHz, CDCl<sub>3</sub>): δ 7.79-7.77 (m, 2H), 7.40-7.38 (m, 2H), 7.36-7.31 (m, 5H), 7.29-7.22 (m, 7H), 7.21-7.16 (m, 4H), 7.01 (d, *J* = 7.2 Hz, 2H), 6.80 (d, *J* = 8.4 Hz, 2H), 6.35 (d, *J* = 1.2 Hz, 1H), 3.78 (q, *J* = 7.2 Hz, 1H), 3.39 (d, *J* = 13.2 Hz, 1H), 3.07 (s, 3H), 2.99 (d, *J* = 13.2 Hz, 1H), 2.35 (d, *J* = 7.2 Hz, 2H), 1.80-1.70 (m, 1H), 1.47 (d, *J* = 6.8 Hz, 3H), 0.80-0.78 (m, 6H). <sup>13</sup>C NMR (100 MHz, CDCl<sub>3</sub>): δ 173.1, 172.4, 164.2, 149.6, 147.4, 140.7, 140.0, 139.9, 139.6, 137.3, 134.8, 131.2, 129.81, 129.78, 129.4, 128.9, 128.8, 128.7, 128.4, 128.3, 128.1, 127.8, 127.5, 127.2, 127.1, 120.3, 72.2, 51.3, 46.3, 45.2, 45.0, 30.1, 22.3, 18.5 (*1 aromatic carbon signal is not observed due to signal overlap*). IR (neat): 2952, 1752, 1721, 1594, 1504, 1444, 1198, 1165, 1135, 1071, 1018, 756, 696 cm<sup>-1</sup>. HRMS (ESI) calcd. for C<sub>46</sub>H<sub>44</sub>NO<sub>4</sub> [M+H]<sup>+</sup>: 674.3265, found 674.3265.

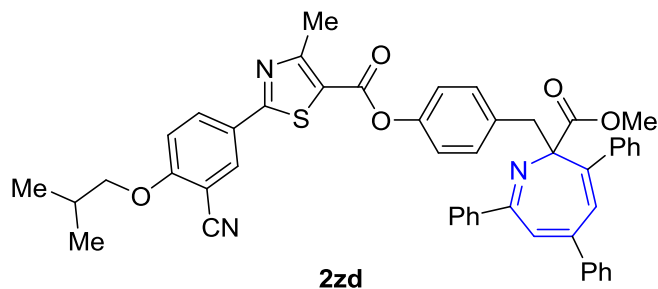

**4-((2-(Methoxycarbonyl)-3,5,7-triphenyl-2H-azepin-2-yl)methyl)phenyl 2-(3-cyano-4-isobutoxyphenyl)-4-methylthiazole-5-carboxylate (2zd).** 0.3 mmol scale, under N<sub>2</sub> atmosphere, pyridinium salt **1zd** (0.3 mmol, 261.5 mg), K<sub>2</sub>CO<sub>3</sub> (0.33 mmol, 45.6 mg) and 1,4-dioxane (3.0 mL) were stirred at 30 °C for 12 h. Then the reaction mixture was filtered through a short pad of silica gel, rinsed with ethyl acetate, and concentrated under vacuum. The residue was purified by column chromatography on silica gel (eluent: petroleum ether: ethyl acetate: dichloromethane = 15:1:3) to afford the title product in 83% yield (195.1 mg) as a yellow solid. M.p. = 124-125 °C. <sup>1</sup>H NMR (600 MHz, CDCl<sub>3</sub>): δ 8.21 (d, *J* = 2.4 Hz, 1H), 8.11 (dd, *J* = 3.0, 2.4 Hz, 1H), 7.91-9.0 (m, 2H), 7.52 (d, *J* = 6.6 Hz, 2H), 7.49-7.46 (m, 5H), 7.43-7.35 (m, 9H), 7.12 (d, *J* = 8.4 Hz, 2H), 7.01 (d, *J* = 9.0 Hz, 1H), 6.49 (d, *J* = 1.2 Hz, 1H), 3.90 (d, *J* = 6.6 Hz, 2H), 3.53 (d, *J* = 13.2 Hz, 1H), 3.26 (s, 3H), 3.14 (d, *J* = 13.2 Hz, 1H), 2.81 (s, 3H), 2.23-2.17 (m, 1H), 1.09 (d, *J* = 6.6 Hz, 6H). <sup>13</sup>C NMR (150 MHz, CDCl<sub>3</sub>): δ 172.3, 168.0, 164.3, 162.7, 162.6, 160.3, 149.1, 147.43, 147.39, 140.0, 139.9, 139.6, 135.4, 132.6, 132.2, 131.5, 129.9, 129.8, 128.9, 128.8, 128.7, 128.5, 128.3, 128.1, 127.8, 127.5, 127.2, 125.9, 120.9, 120.5, 115.3, 112.6, 103.0, 75.7, 72.2, 51.4, 46.3, 28.1, 19.0, 17.6. IR (neat): 2957, 1725, 1602, 1504, 1431, 1372, 1329, 1248, 1193, 1165, 1119, 1054, 1012, 818, 756, 695, 661 cm<sup>-1</sup>. HRMS (ESI) calcd. for C<sub>49</sub>H<sub>42</sub>N<sub>3</sub>O<sub>5</sub>S [M+H]<sup>+</sup>: 784.2840, found 784.2841.

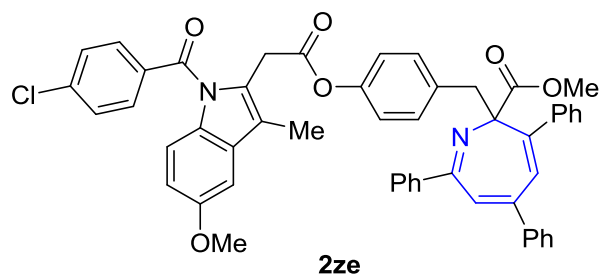

**Methyl 2-(4-(2-(1-(4-chlorobenzoyl)-5-methoxy-3-methyl-1H-indol-2-yl)acetoxymethyl)phenyl)-4-methylthiazole-5-carboxylate**

**benzyl)-3,5,7-triphenyl-2H-azepine-2-carboxylate (2ze).** 0.3 mmol scale, under N<sub>2</sub> atmosphere, pyridinium salt **1ze** (0.3 mmol, 274.0 mg), K<sub>2</sub>CO<sub>3</sub> (0.33 mmol, 45.6 mg) and 1,4-dioxane (3.0 mL) were stirred at 30 °C for 12 h. Then the reaction mixture was filtered through a short pad of silica gel, rinsed with ethyl acetate, and concentrated under vacuum. The residue was purified by column chromatography on silica gel (eluent: petroleum ether: ethyl acetate: dichloromethane = 15:1:3) to afford the title product in 84% yield (208.0 mg) as a yellow solid. M.p. = 107-108 °C. <sup>1</sup>H NMR (400 MHz, CDCl<sub>3</sub>): δ 7.90-7.88 (m, 2H), 7.63 (d, *J* = 8.4 Hz, 2H), 7.50 (d, *J* = 6.8 Hz, 2H), 7.47-7.39 (m, 7H), 7.37-7.29 (m, 9H), 7.05 (d, *J* = 2.4 Hz, 1H), 6.97 (d, *J* = 8.8 Hz, 2H), 6.89 (d, *J* = 9.2 Hz, 1H), 6.67 (dd, *J* = 8.8, 2.4 Hz, 1H), 6.46 (d, *J* = 1.2 Hz, 1H), 3.84 (s, 2H), 3.79 (s, 3H), 3.50 (d, *J* = 13.2 Hz, 1H), 3.20 (s, 3H), 3.10 (d, *J* = 13.6 Hz, 1H), 2.41 (s, 3H). <sup>13</sup>C NMR (100 MHz, CDCl<sub>3</sub>): δ 172.2, 169.1, 168.1, 164.1, 156.0, 149.5, 147.3, 140.0, 139.8, 139.5, 139.1, 136.0, 135.0, 133.8, 131.3, 131.1, 130.7, 130.5, 129.8, 129.7, 129.0, 128.8, 128.74, 128.67, 128.4, 128.3, 128.0, 127.7, 127.4, 127.1, 120.2, 114.9, 112.1, 111.7, 101.1, 72.1, 55.6, 51.3, 46.2, 30.4, 13.3 (*1 aromatic carbon signal is not observed due to signal overlap*). IR (neat): 2940, 1747, 1683, 1592, 1478, 1357, 1318, 1241, 1196, 1165, 1126, 1088, 1066, 1014, 923, 836, 755, 697 cm<sup>-1</sup>. HRMS (ESI) calcd. for C<sub>52</sub>H<sub>42</sub>ClN<sub>2</sub>O<sub>6</sub> [M+H]<sup>+</sup>: 825.2726, found 825.2723.

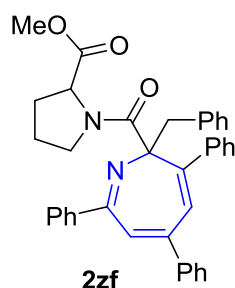

**Methyl (2-benzyl-3,5,7-triphenyl-2H-azepine-2-carbonyl)prolinate (2zf).** 0.3 mmol scale, under N<sub>2</sub> atmosphere, pyridinium salt **1zf** (0.3 mmol, 196.4 mg), K<sub>2</sub>CO<sub>3</sub> (0.33 mmol, 45.6 mg) and dimethylacetamide (3.0 mL) were stirred at 80 °C for 12 h. Then the reaction mixture was quenched with water, extracted with ethyl acetate, and the organic layer was washed with water and brine, and dried over anhydrous Na<sub>2</sub>SO<sub>4</sub>. The resulting filtrate was concentrated under vacuum. The residue was purified by column chromatography on silica

gel (eluent: petroleum ether: ethyl acetate = 25:1 to 5:1, gradient) to afford a mixture of diastereoisomers (d.r. 1:0.7) in 73% yield (123.7 mg) as a yellow solid. M.p. = 112-113 °C. <sup>1</sup>H NMR (600 MHz, CDCl<sub>3</sub>): δ 7.98 (d, *J* = 6.6 Hz, 2H), 7.88 (s, 1.4H), 7.66 (d, *J* = 6.6 Hz, 1.4H), 7.63 (d, *J* = 7.8 Hz, 2H), 7.53-7.52 (m, 2.1H), 7.50-7.49 (m, 3H), 7.44-7.38 (m, 10.2H), 7.34-7.25 (m, 11.9H), 7.20-7.18 (m, 1.7H), 6.46 (s, 0.7H), 6.44 (s, 1H), 4.18 (t, *J* = 7.8 Hz, 1H), 3.87-3.85 (m, 0.7H), 3.76 (s, 2.1H), 3.33 (d, *J* = 13.2 Hz, 1H), 3.27 (s, 1.4H), 3.16 (d, *J* = 13.2 Hz, 1H), 2.84 (s, 3H), 2.56 (t, *J* = 8.4 Hz, 1H), 2.37-2.33 (m, 1H), 2.23-2.22 (m, 0.7H), 1.97 (br, 0.7H), 1.85 (br, 0.7H), 1.80-1.76 (m, 1H), 1.59-1.58 (m, 0.7H), 1.51-1.50 (m, 0.7H), 1.38-1.36 (m, 0.7H), 1.26-1.23 (m, 2H), 0.66-0.62 (m, 1H). <sup>13</sup>C NMR (150 MHz, CDCl<sub>3</sub>): δ 172.8 (minor), 172.7 (major), 171.74 (minor), 171.70 (major), 163.0 (major), 162.3 (minor), 150.7 (minor), 150.5 (minor), 149.9 (major), 149.7 (major), 140.7 (major), 140.6 (minor), 140.4 (major), 140.0 (minor), 139.4 (minor), 139.3 (major), 137.9 (major), 137.2 (minor), 132.5 (minor), 131.2 (major), 130.1 (major), 129.9 (major), 128.9 (minor), 128.7 (major), 128.6 (minor), 128.53 (major), 128.48 (minor), 128.4 (major), 127.9 (major), 127.8 (minor), 127.72 (major), 127.68 (major), 127.6 (minor), 127.44 (major), 127.36 (minor), 127.3 (minor), 127.2 (minor), 127.1 (major), 126.6 (major), 126.4 (minor), 125.8 (major), 124.6 (minor), 72.9 (major), 72.4 (minor), 61.1 (major), 59.9 (minor), 51.8 (minor), 51.1 (major), 50.7 (major), 49.9 (minor), 48.5 (major), 47.3 (minor), 28.0 (minor), 27.7 (major), 25.5 (minor), 25.4 (major) (*several aromatic carbon signals of the isomers are not observed due to signal overlap*). IR (neat): 2951, 1739, 1622, 1494, 1395, 1166, 874, 757, 697, 603 cm<sup>-1</sup>. HRMS (ESI) calcd. for C<sub>38</sub>H<sub>35</sub>N<sub>2</sub>O<sub>3</sub> [M+H]<sup>+</sup>: 567.2642, found 567.2642.

## Gram scale study

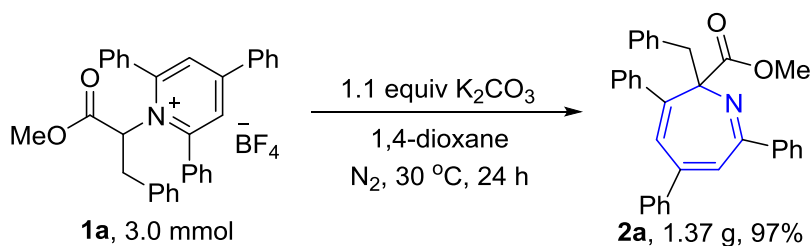

To an oven-dried sealable Schlenk tube (100.0 mL) equipped with a stir bar was

added pyridinium salts **1a** (3.0 mmol, 1.67 g) and  $K_2CO_3$  (3.3 mmol, 456.1 mg) under  $N_2$  atmosphere. Then, the tube was re-evacuated and refilled with nitrogen for three times before adding 1,4-dioxane (30.0 mL, 0.1 M with respect to **1a**) via a syringe. The Schlenk tube was securely sealed and immersed into an oil bath preheated at 30 °C. After stirring at the same temperature for 24 h, the reaction mixture was filtered through a short pad of silica gel, and rinsed with ethyl acetate. Then, the resulting organic layer was evaporated under the reduced pressure, and the residue was purified by column chromatography on silica gel (eluent: petroleum ether: ethyl acetate = 100:1 to 25:1, gradient) to afford the target azepine product **2a** in 97% yield (1.37 g) as a white solid. *This result highlights the robustness and scalability of this process, as almost no loss in yield was observed when it was conducted on gram-scale experiment.*

### One-pot transformation

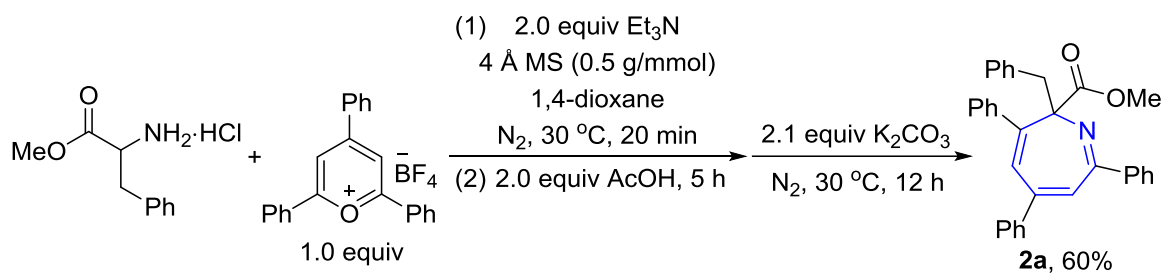

To an oven-dried sealable Schlenk tube (15.0 mL) equipped with a stir bar was added methyl phenylalaninate hydrochloride (0.3 mmol, 64.7 mg), pyrylium salt (0.3 mmol, 118.9 mg), 4 Å MS (150.0 mg), 1,4-dioxane (3.0 mL, 0.1 M with respect to methyl phenylalaninate hydrochloride) and  $Et_3N$  (0.6 mmol, 60.7 mg) under  $N_2$  atmosphere. After stirring at 30 °C for 20 min, AcOH (0.6 mmol, 36.0 mg) was added via a syringe. Then, the Schlenk tube was securely sealed and stirred at 30 °C for 5 h. Subsequently,  $K_2CO_3$  (0.63 mmol, 87.1 mg) was directly added into the reaction mixture under  $N_2$  atmosphere without further purification (*Note: when 1.1 equivalents of  $K_2CO_3$  was used, the pyridinium salt could not be completely consumed due to the presence of a slight excess of acid in the one-pot conditions*). After stirring at the same temperature for 12 h, the reaction mixture was filtered through a short pad of silica gel, and rinsed with ethyl acetate. The resulting organic layer was evaporated under the reduced pressure, and the residue was purified by

column chromatography on silica gel (eluent: petroleum ether: ethyl acetate: dichloromethane = 100:1:3) to afford the target azepine product **2a** in 60% overall yield (84.5 mg) as a white solid. *This result would have many advantages in terms of practicability, as it avoids the separation of the resulting pyridinium salt and reduces the waste of solvents in purifications.*

## Bioactivity testing for selected azepine derivatives

**Cell antiproliferative assay:** Cell antiproliferative activity was evaluated by the CellTiter-Glo (Promega, USA) assay. Make 1000× compounds solution in DMSO, add 1 μL 1000× compounds to 49 μL growth medium to make 20× compounds. Dilute cell suspensions in growth medium to desired density and 95 μL were taken to 96-well plate. Add 5 μL 20× compounds into 96-well plate. Final DMSO concentration in each well was 0.1%. Then the cell was incubated at 37°C, 5% CO<sub>2</sub> for 72 h. Equilibrate the assay plate to room temperature before measurement. Add 20 μL of CellTiter-Glo<sup>®</sup> Reagent into each well. Mix contents for 2 minutes on an orbital shaker to induce cell lysis. Incubate at room temperature for 10 minutes to stabilize luminescent signal. Record luminescence using EnVision Multilabel Reader (PerkinElmer). Cell viability (CV%) was calculated relative to vehicle (DMSO) treated control wells using following formula: Cell viability (%) = (RLU compound - RLU blank)/(RLU control - RLU blank)\*100%. The IC<sub>50</sub> values were calculated using GraphPad Prism 6.0 software, fitting to a 4-parameter equation to generate concentration response curves.

### Data for bioactivity study:

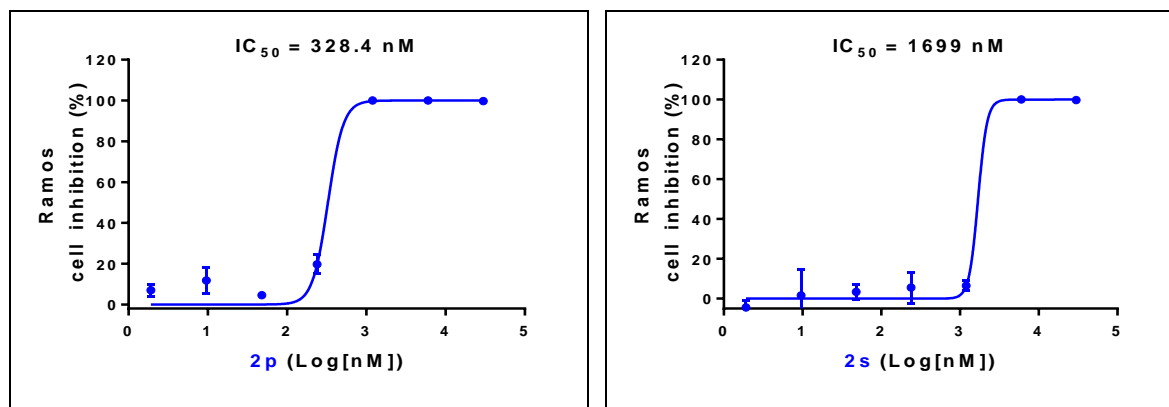

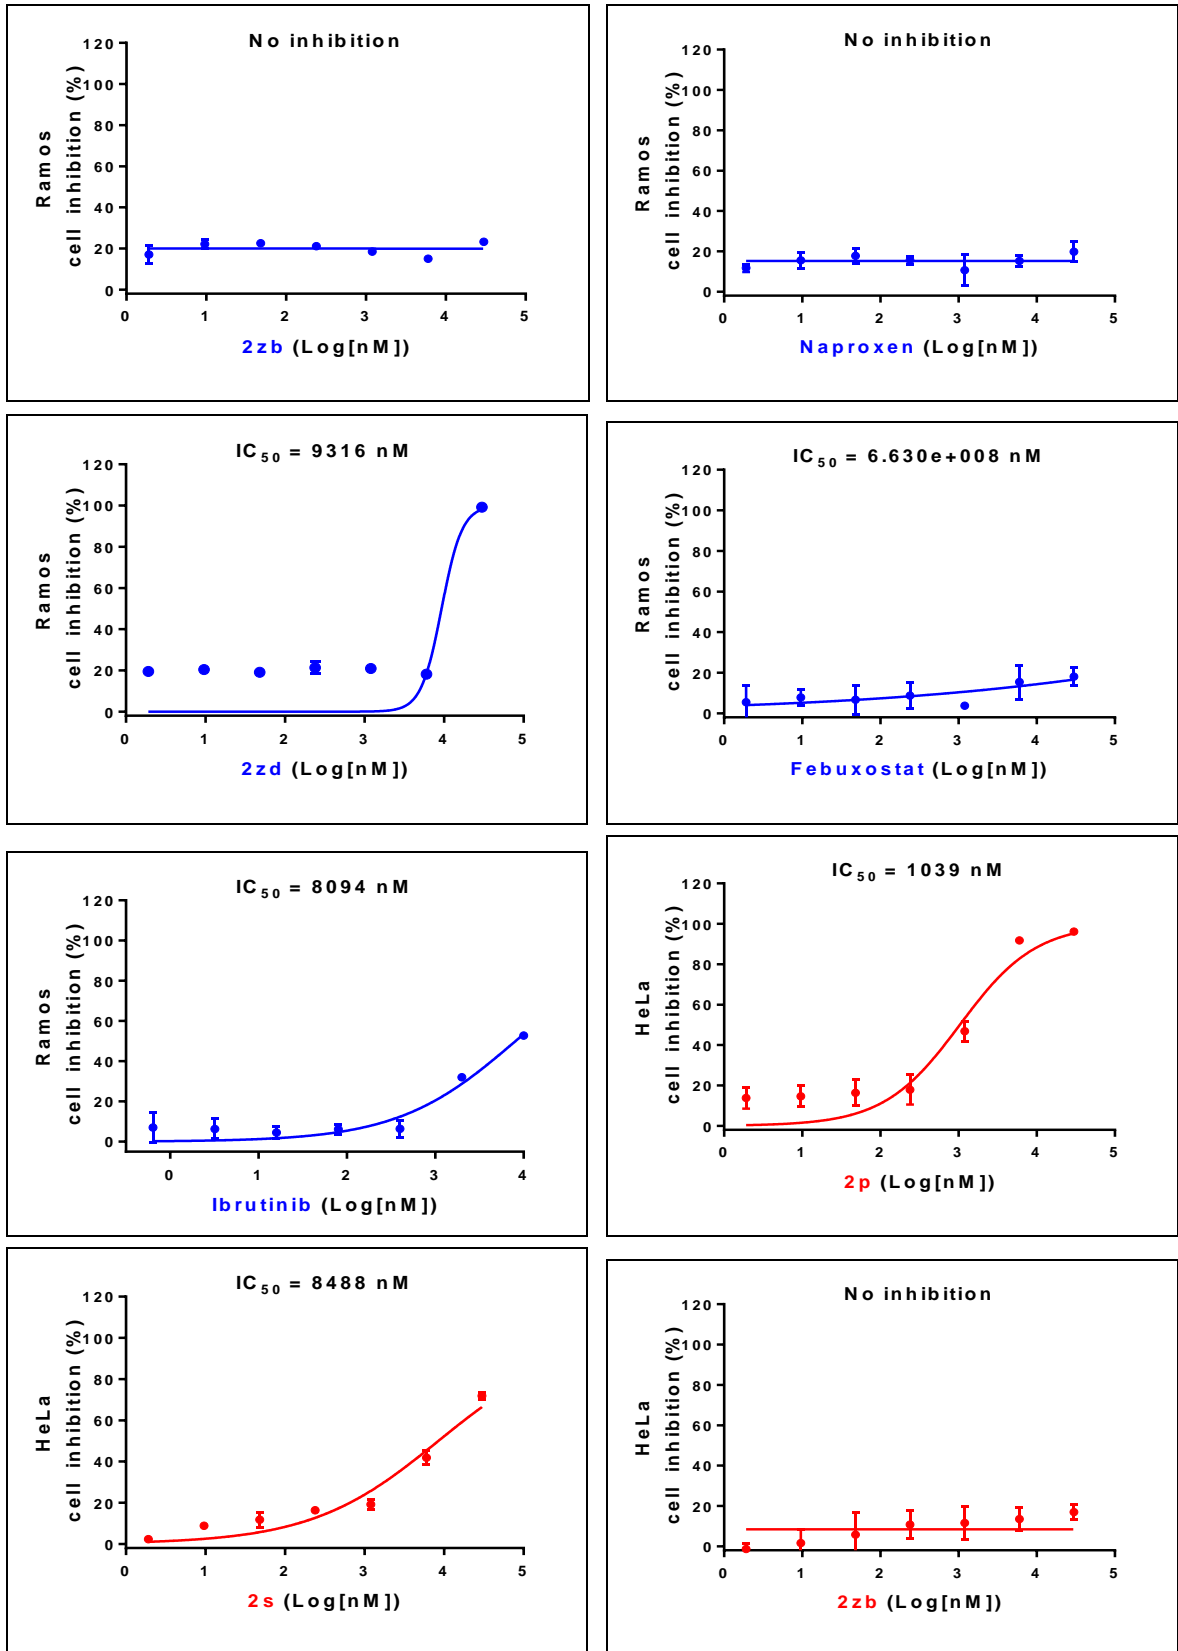



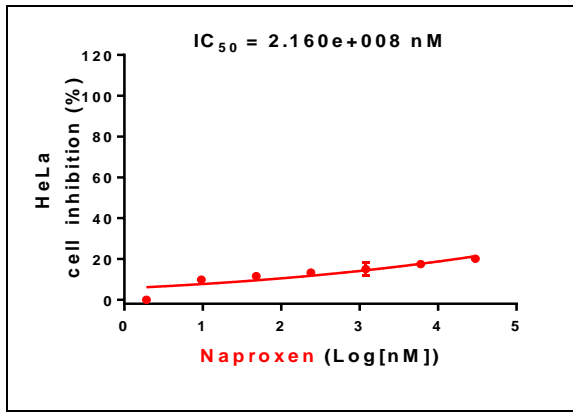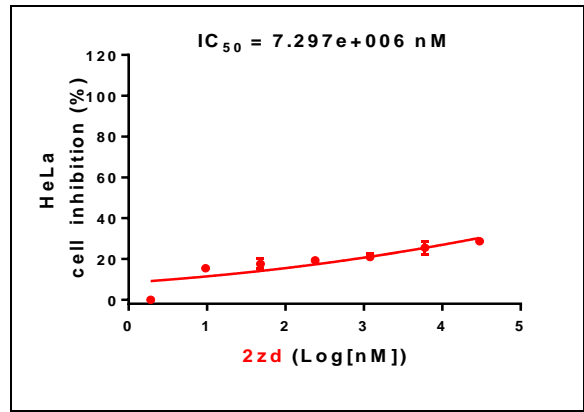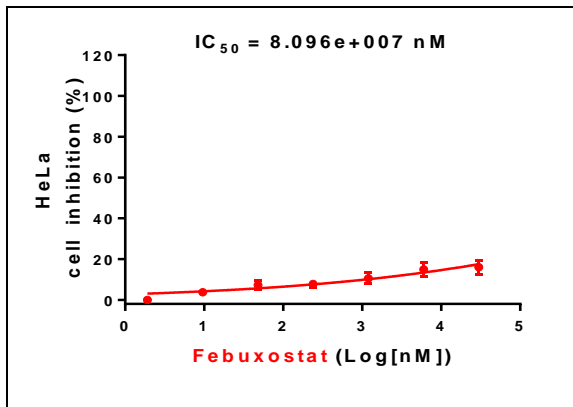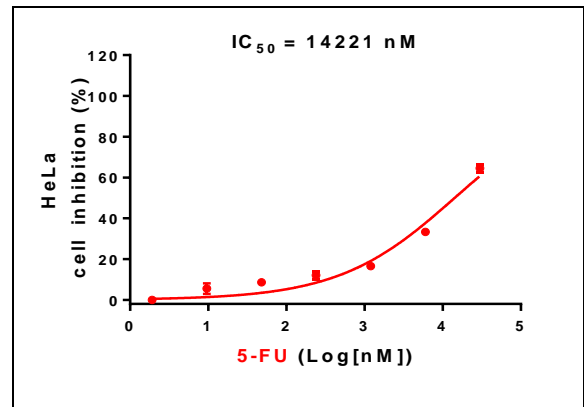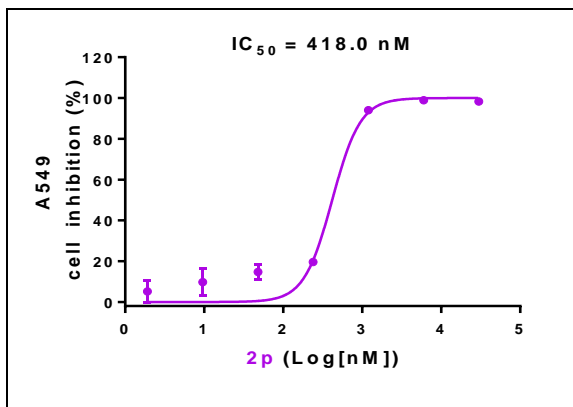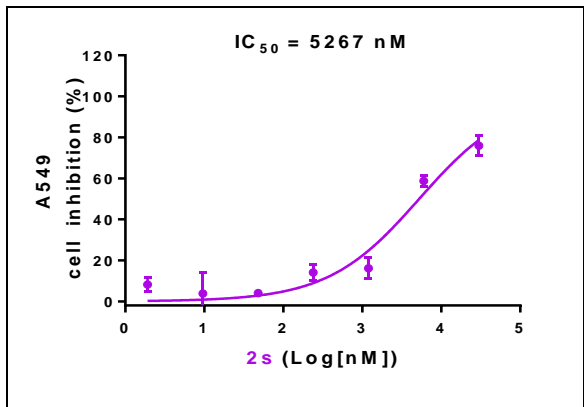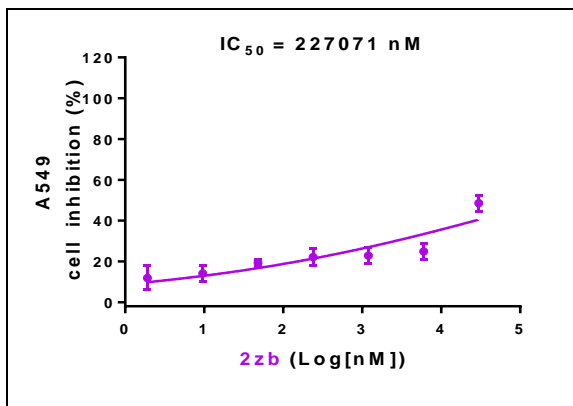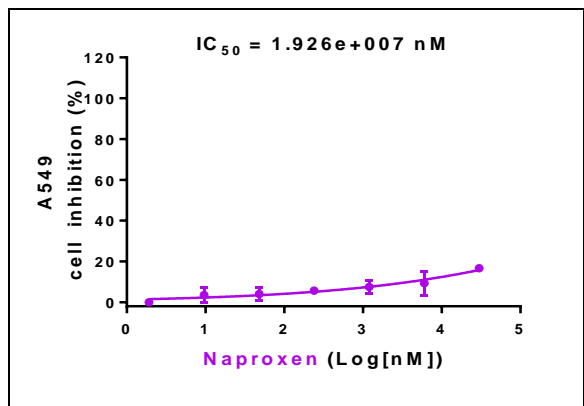

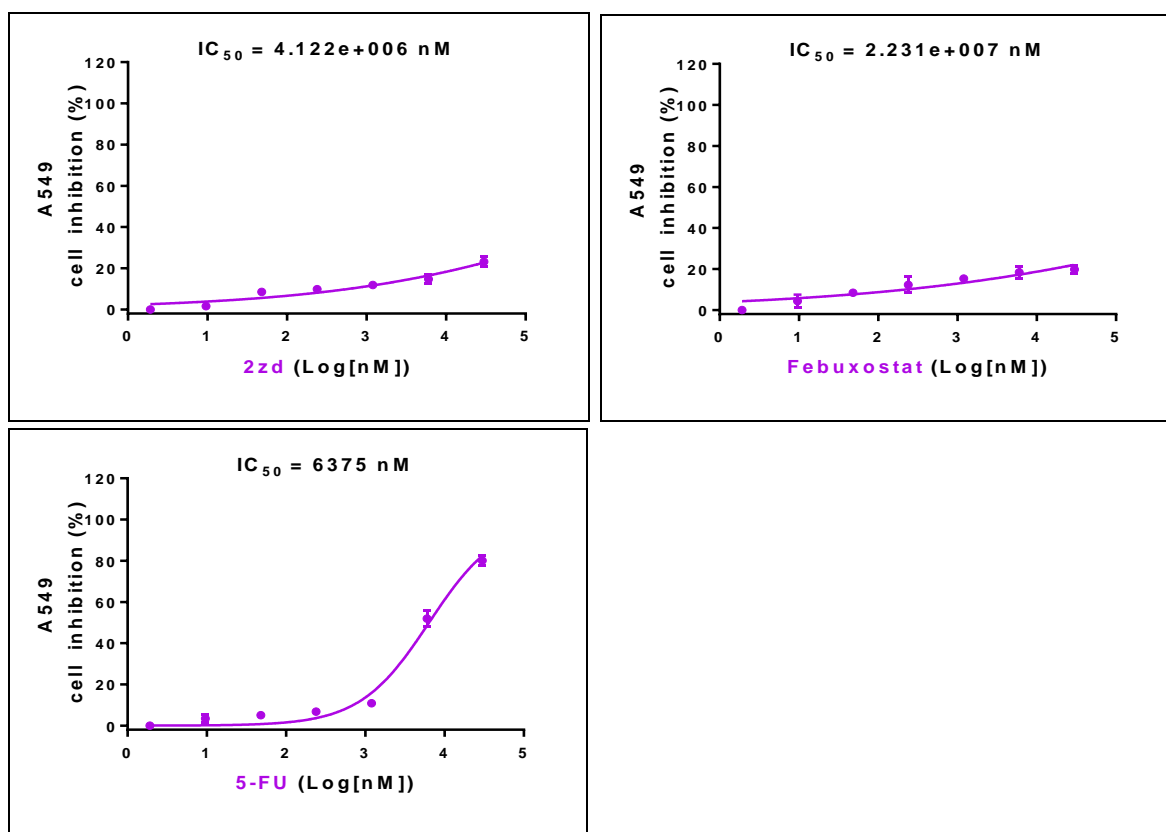

## Radical trap experiment

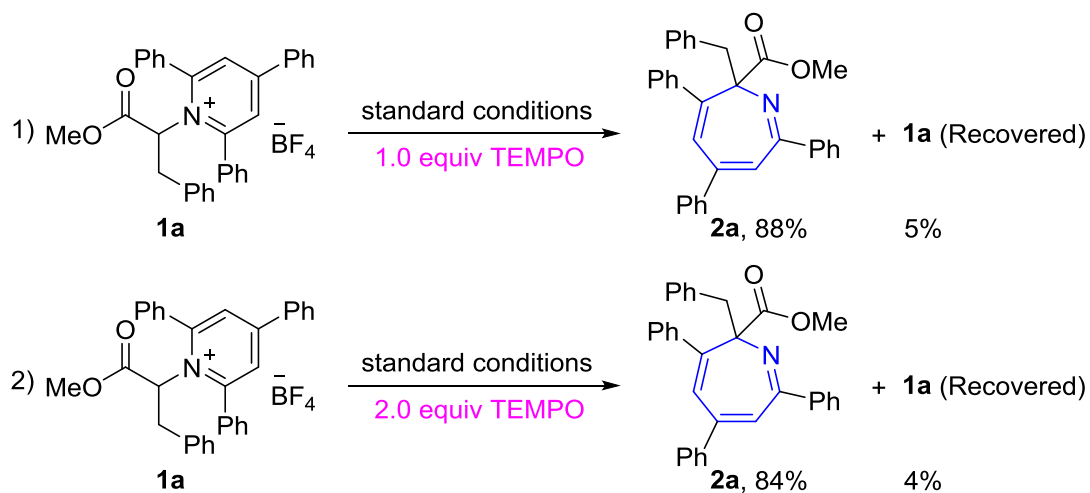

A sealable Schlenk tube (15.0 mL) was heated under vacuum using a heatgun, and evacuated and back-filled with nitrogen for three times. After the tube was cooled to room temperature, pyridinium salts **1a** (0.3 mmol, 167.2 mg),  $K_2CO_3$  (0.33 mmol, 45.6 mg) and 2,2,6,6-tetramethylpiperidine-*N*-oxyl (TEMPO, 1.0 or 2.0 equiv) were added successively under nitrogen atmosphere. Then, the tube was re-evacuated and refilled with nitrogen for three times before adding 1,4-dioxane (3.0 mL, 0.1 M with respect to **1a**) via a syringe.

The Schlenk tube was securely sealed and immersed into an oil bath preheated at 30 °C. After stirring at the same temperature for 12 h, the reaction mixture was filtered through a short pad of silica gel, and rinsed with ethyl acetate. The resulting organic layer was evaporated under the reduced pressure, and the residue was purified by column chromatography on silica gel (eluent: petroleum ether: ethyl acetate = 50:1 to 25:1, gradient) to afford the target azepine product **2a** in 88% (123.7 mg) and 84% (119.0 mg) yields, respectively. (*Note: the slightly lower yield in this case was attributed to the incomplete consumption of the pyridinium salt 1a.*)

**Conclusion:** *These results indicate that a free radical pathway is not likely to be involved in this process.*

### Radical clock experiment

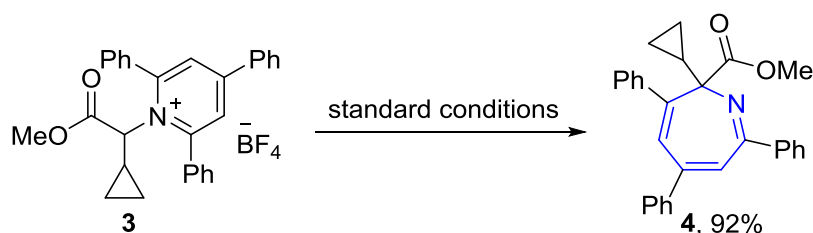

A sealable Schlenk tube (15.0 mL) was heated under vacuum using a heatgun, and evacuated and back-filled with nitrogen for three times. After the tube was cooled to room temperature, pyridinium salts **3** (0.3 mmol, 152.2 mg) and  $\text{K}_2\text{CO}_3$  (0.33 mmol, 45.6 mg) were added successively under nitrogen atmosphere. Then, the tube was re-evacuated and refilled with nitrogen for three times before adding 1,4-dioxane (3.0 mL, 0.1 M with respect to **3**) via a syringe. The Schlenk tube was securely sealed and immersed into an oil bath preheated at 30 °C. After stirring at the same temperature for 12 h, the reaction mixture was filtered through a short pad of silica gel, and rinsed with ethyl acetate. Then, the resulting organic layer was evaporated under the reduced pressure, and the residue was purified by column chromatography on silica gel (eluent: petroleum ether: ethyl acetate = 25:1) to afford the title product **4** in 92% yield (115.8 mg) as a white solid, while no ring-opened product was observed in the reaction mixture.

**Conclusion:** *This result shows that an alkyl radical species might not be generated*

*in the reaction, otherwise the ring-opened product would be the main product.*

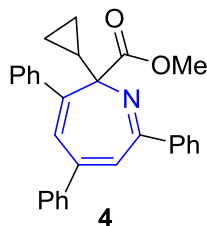

**Methyl 2-cyclopropyl-3,5,7-triphenyl-2H-azepine-2-carboxylate (4).** M.p. = 184-185 °C.  $^1\text{H}$  NMR (600 MHz,  $\text{CDCl}_3$ ):  $\delta$  7.82-7.80 (m, 2H), 7.45 (d,  $J = 7.2$  Hz, 2H), 7.35-7.31 (m, 8H), 7.27 (t,  $J = 7.2$  Hz, 1H), 7.24-7.19 (m, 3H), 6.38 (d,  $J = 1.2$  Hz, 1H), 3.41 (s, 3H), 1.14-1.10 (m, 1H), 1.05-1.01 (m, 1H), 0.89-0.85 (m, 1H), 0.38-0.33 (m, 1H), 0.14-0.10 (m, 1H).  $^{13}\text{C}$  NMR (150 MHz,  $\text{CDCl}_3$ ):  $\delta$  174.0, 163.5, 148.6, 147.8, 140.6, 140.3, 139.5, 129.8, 128.73, 128.71, 128.6, 128.2, 127.90, 127.85, 127.3, 127.2, 127.1, 68.7, 51.9, 19.5, 3.7, 2.1 (*1 aromatic carbon signal is not observed due to signal overlap*). IR (neat): 3023, 1728, 1598, 1489, 1442, 1225, 1161, 1049, 1028, 876, 756, 695  $\text{cm}^{-1}$ . HRMS (ESI) calcd. for  $\text{C}_{29}\text{H}_{26}\text{NO}_2$   $[\text{M}+\text{H}]^+$ : 420.1958, found 420.1955.

### X-ray diffraction data of 2n

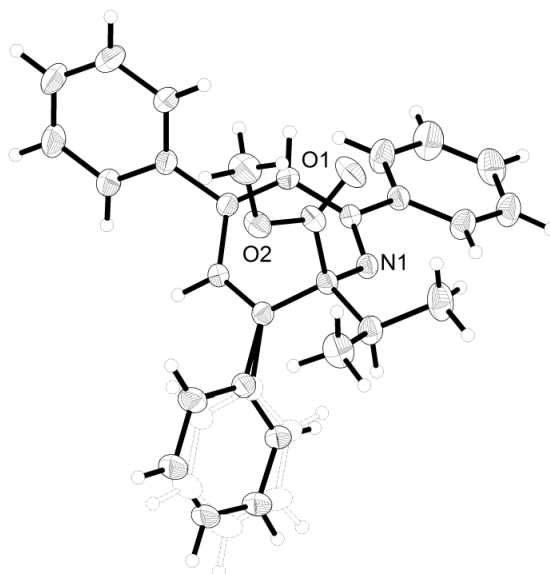

**Figure S1.** X-ray crystal structure of **2n** (Ellipsoid probability: 30%)

**Note:** The single crystal of **2n** suitable for X-ray diffraction was obtained by volatilizing a mixed solution of **2n** in ethyl acetate and petroleum ether at room temperature.

**Table S5.** Crystal data of **2n** (CCDC 2181086)

---

|                                                               |                           |                                  |                           |
|---------------------------------------------------------------|---------------------------|----------------------------------|---------------------------|
| Bond precision:                                               | C-C = 0.0039 Å            | Wavelength=1.54184               |                           |
| Cell:                                                         | a=14.4625 (4)<br>alpha=90 | b=9.6213 (2)<br>beta=106.550 (3) | c=17.4857 (4)<br>gamma=90 |
| Temperature:                                                  | 293 K                     |                                  |                           |
|                                                               | Calculated                | Reported                         |                           |
| Volume                                                        | 2332.30 (10)              | 2332.30 (10)                     |                           |
| Space group                                                   | I a                       | I 1 a 1                          |                           |
| Hall group                                                    | I -2ya                    | I -2ya                           |                           |
| Moiety formula                                                | C29 H27 N O2              | C29 H27 N O2                     |                           |
| Sum formula                                                   | C29 H27 N O2              | C29 H27 N O2                     |                           |
| Mr                                                            | 421.52                    | 421.51                           |                           |
| Dx, g cm <sup>-3</sup>                                        | 1.200                     | 1.200                            |                           |
| Z                                                             | 4                         | 4                                |                           |
| Mu (mm <sup>-1</sup> )                                        | 0.584                     | 0.584                            |                           |
| F000                                                          | 896.0                     | 896.0                            |                           |
| F000'                                                         | 898.49                    |                                  |                           |
| h, k, lmax                                                    | 17, 11, 21                | 17, 11, 21                       |                           |
| Nref                                                          | 4541 [ 2273]              | 2984                             |                           |
| Tmin, Tmax                                                    | 0.907, 0.943              | 0.472, 1.000                     |                           |
| Tmin'                                                         | 0.885                     |                                  |                           |
| Correction method= # Reported T Limits: Tmin=0.472 Tmax=1.000 |                           |                                  |                           |
| AbsCorr = MULTI-SCAN                                          |                           |                                  |                           |
| Data completeness=                                            | 1.31/0.66                 | Theta (max)= 71.339              |                           |
| R(reflections)=                                               | 0.0331 ( 2905)            | wR2(reflections)=                |                           |
| S =                                                           | 1.066                     | 0.0913 ( 2984)                   |                           |
|                                                               | Npar= 348                 |                                  |                           |

## References:

- [1] X. Zhang, C. Jiao, D. Qi, X. Liu, Z. Zhang and G. Zhang, Nickel-catalyzed deaminative allenylation of amino acid derivatives: catalytic activity enhanced by an amide-type NN<sub>2</sub> pincer ligand, *Org. Lett.*, 2022, DOI: 10.1021/acs.orglett.2c02042.
- [2] C.-S. Zhang, L. Bao, K.-Q. Chen, Z.-X. Wang and X.-Y. Chen, Photoinduced  $\alpha$ -alkenylation of Katritzky salts: synthesis of  $\beta,\gamma$ -unsaturated esters, *Org. Lett.*, 2021, **23**, 1577-1581.
- [3] F. J. R. Klauck, M. J. James and F. Glorius, Deaminative strategy for the visible-light-mediated generation of alkyl radicals, *Angew. Chem. Int. Ed.*, 2017, **56**, 12336-12339.
- [4] M. E. Hoerrner, K. M. Baker, C. H. Basch, E. M. Bampo and M. P. Watson, Deaminative arylation of amino acid-derived pyridinium salts, *Org. Lett.*, 2019, **21**, 7356-7360.
- [5] X. Jiang, M.-M. Zhang, W. Xiong, L.-Q. Lu and W.-J. Xiao, Deaminative (carbonylative) alkyl-Heck-type reactions enabled by photocatalytic C-N bond activation, *Angew. Chem. Int. Ed.*, 2019, **58**, 2402-2406.

# NMR spectra of all new compounds

$^1\text{H}$  NMR(400 MHz,  $\text{CDCl}_3$ )

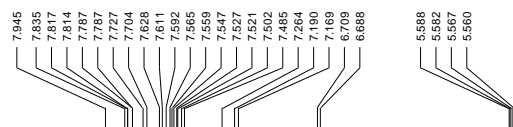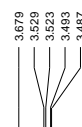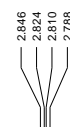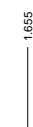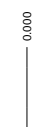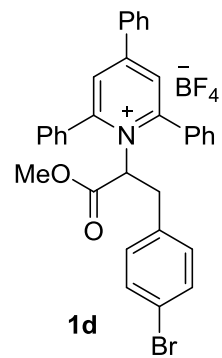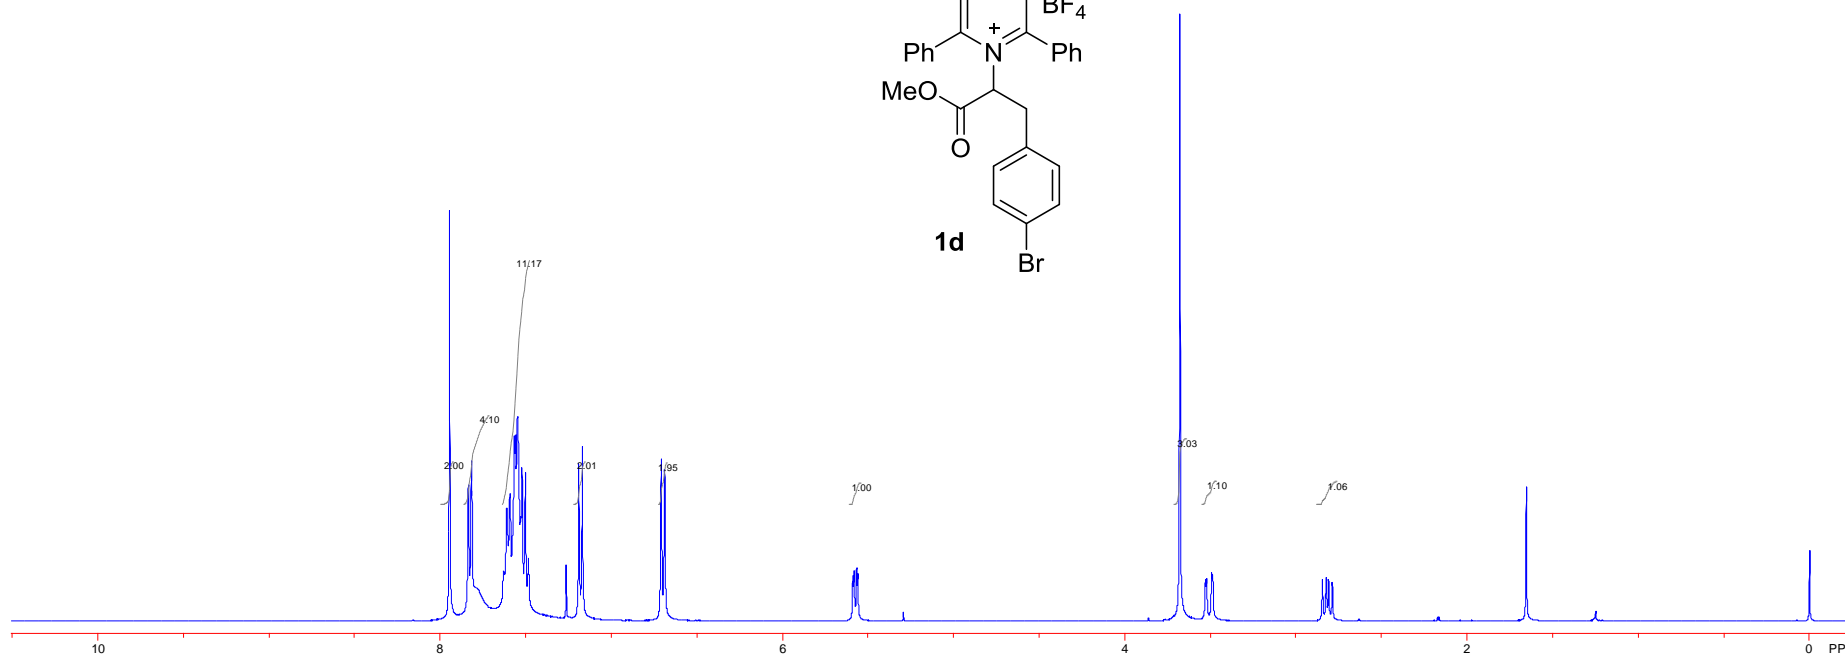

$^{13}\text{C}$  NMR (150 MHz,  $\text{CDCl}_3$ )

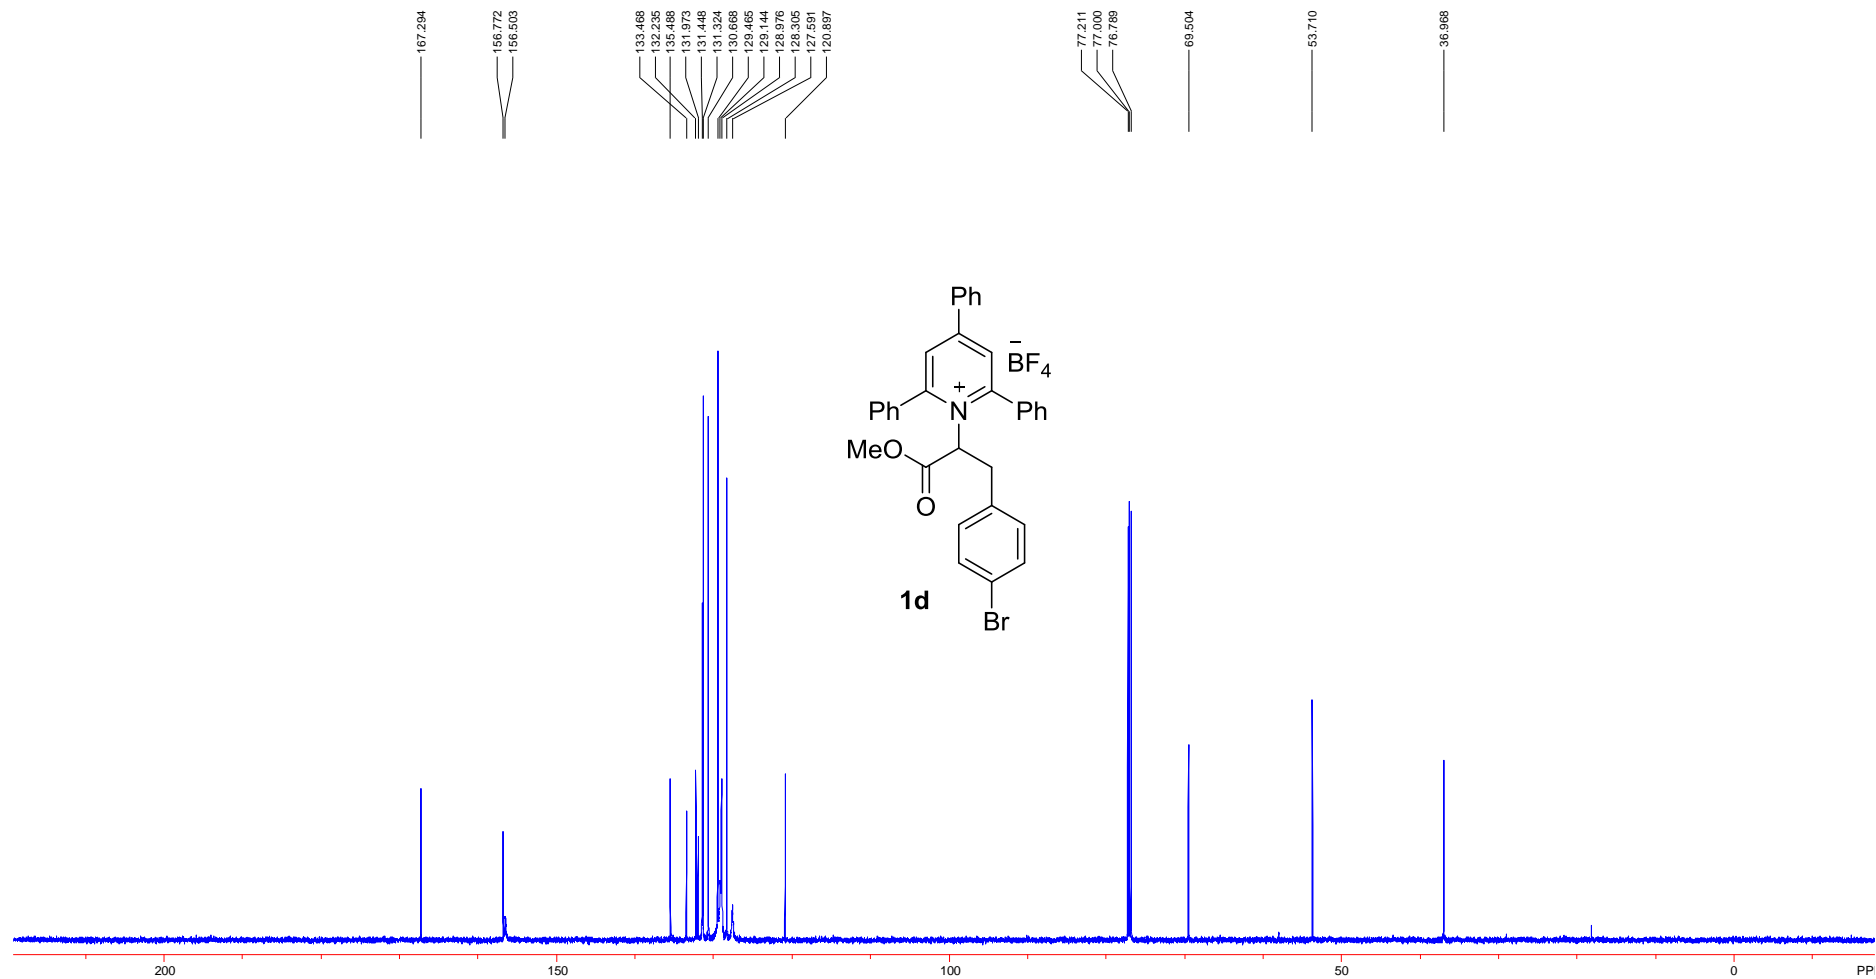



$^{19}\text{F}$  NMR (565 MHz,  $\text{CDCl}_3$ )

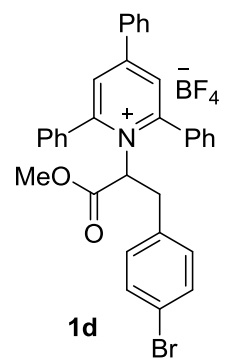

152.515  
152.570

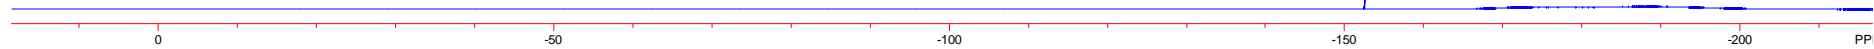

$^1\text{H}$  NMR(600 MHz,  $\text{CDCl}_3$ )

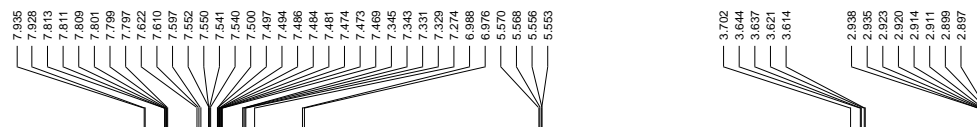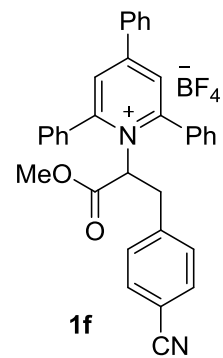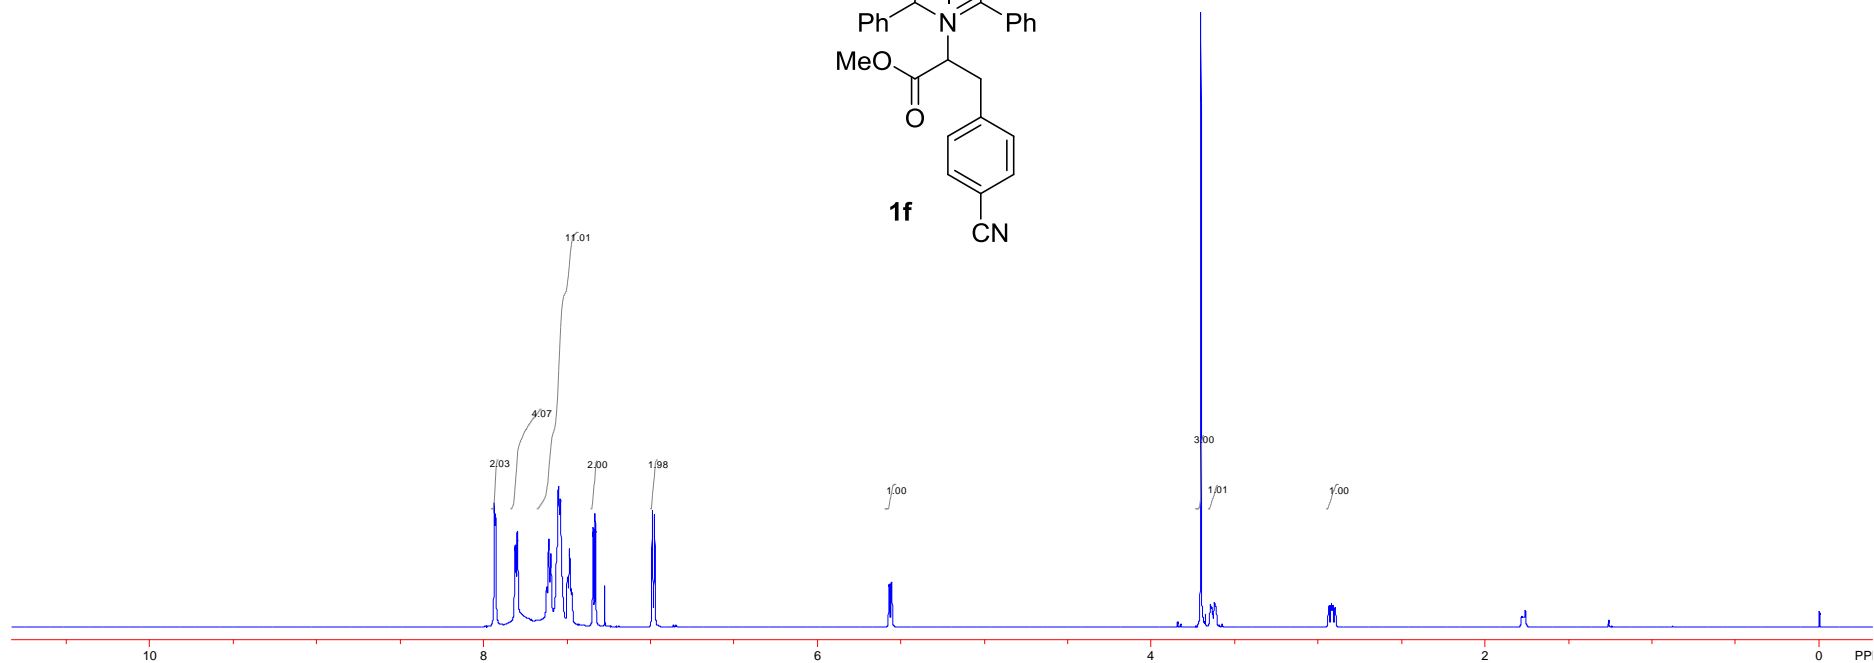

$^{13}\text{C}$  NMR (150 MHz,  $\text{CDCl}_3$ )

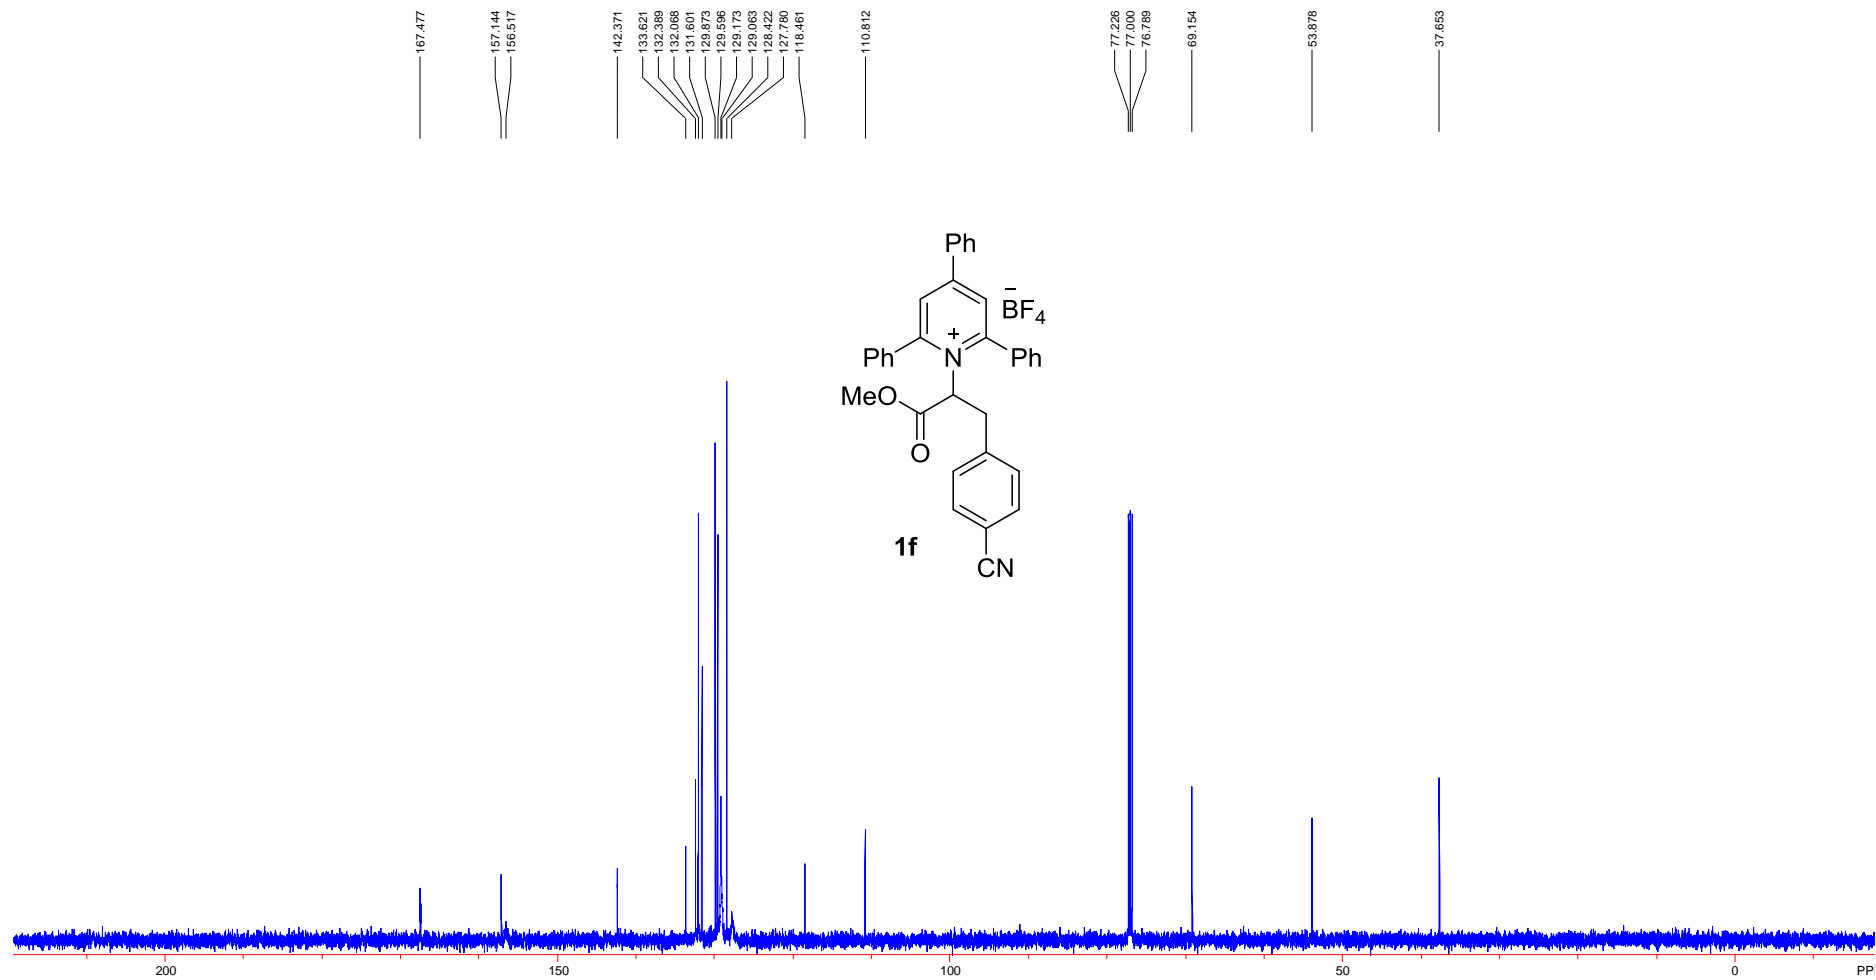

$^{19}\text{F}$  NMR (565 MHz,  $\text{CDCl}_3$ )

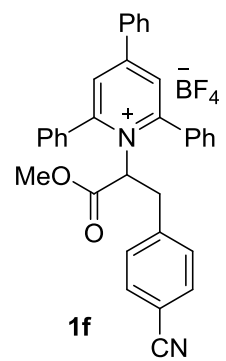

152.298  
152.353

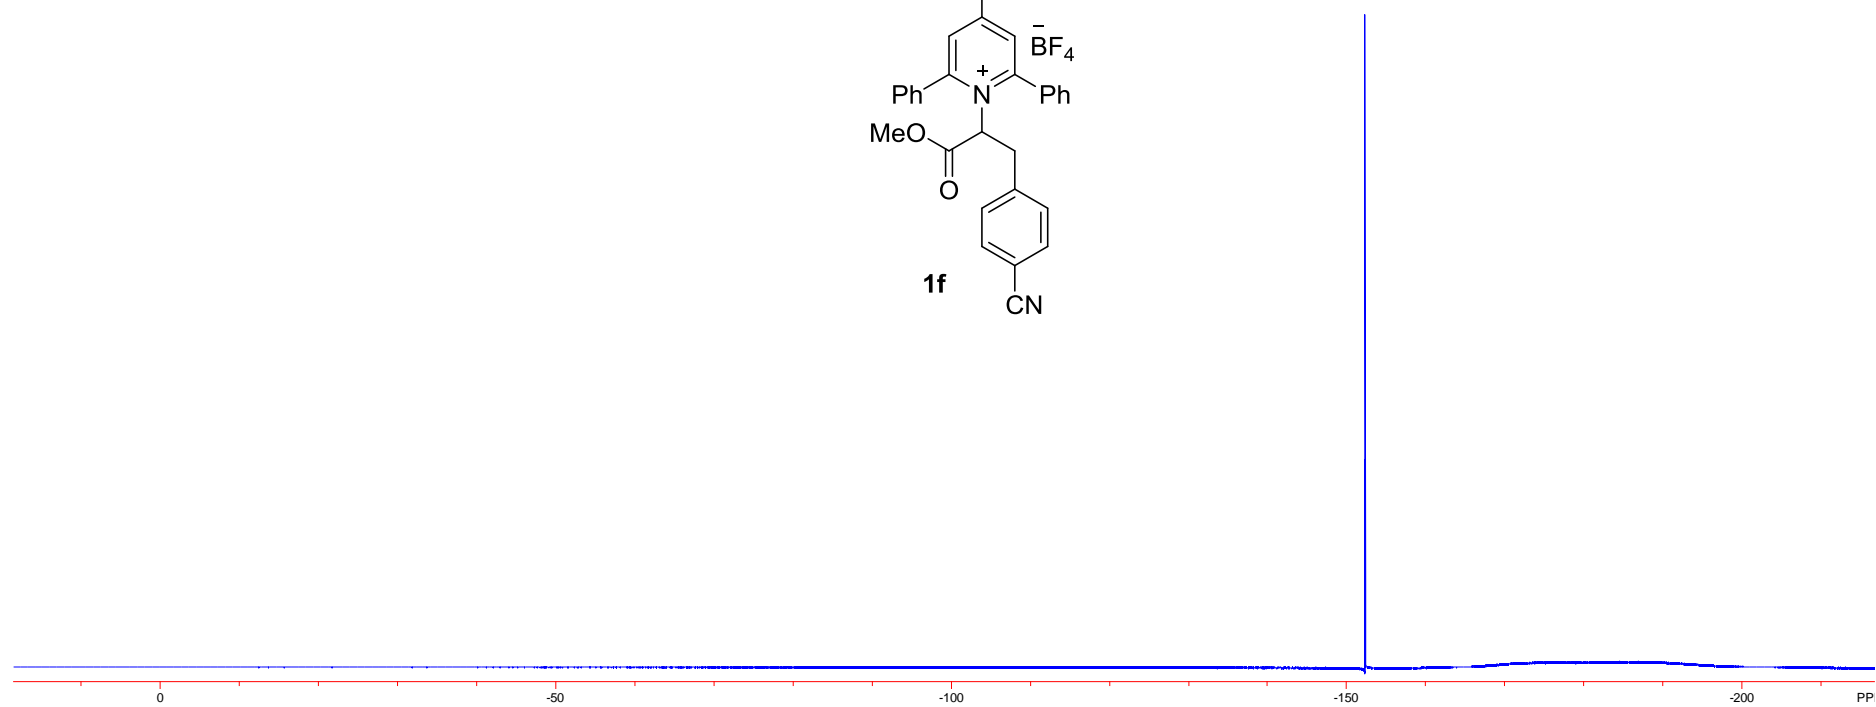

$^1\text{H}$  NMR(400 MHz,  $\text{CDCl}_3$ )

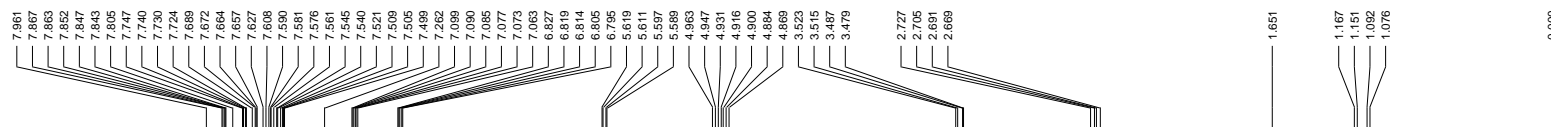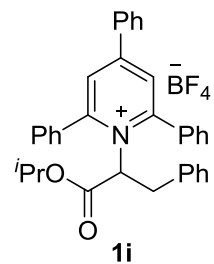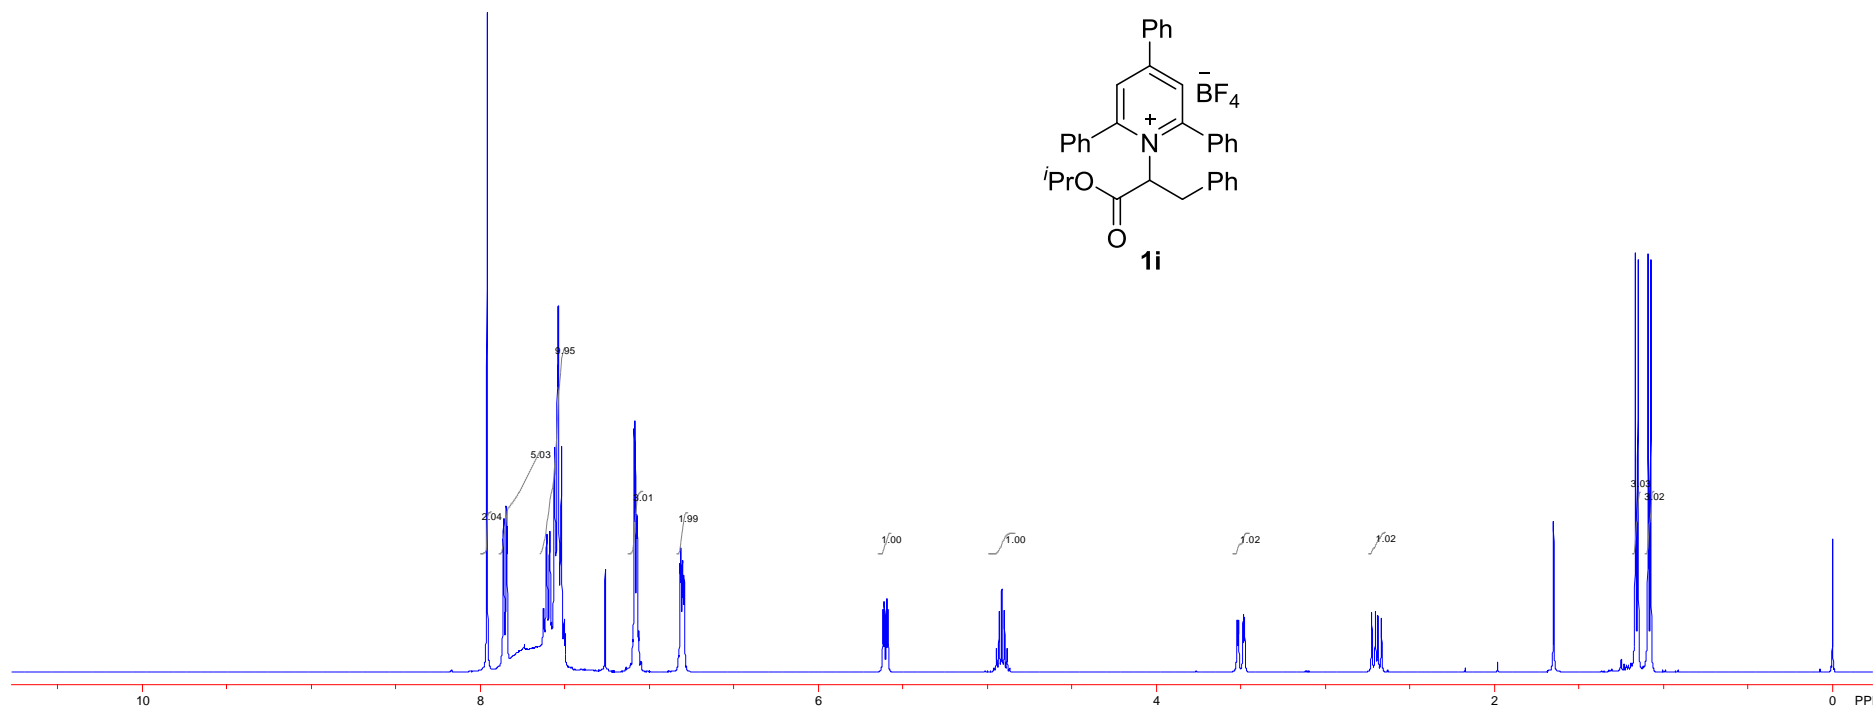



$^{19}\text{F}$  NMR (565 MHz,  $\text{CDCl}_3$ )

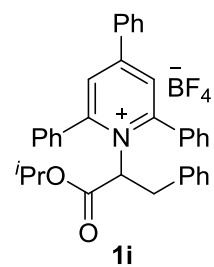

152.758  
152.812

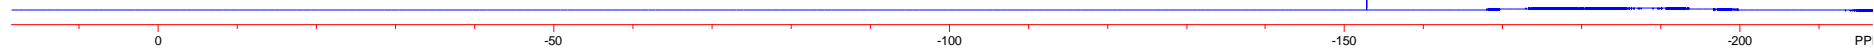

$^1\text{H}$  NMR(400 MHz,  $\text{CDCl}_3$ )

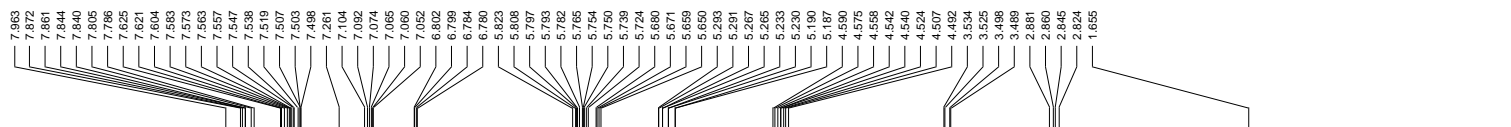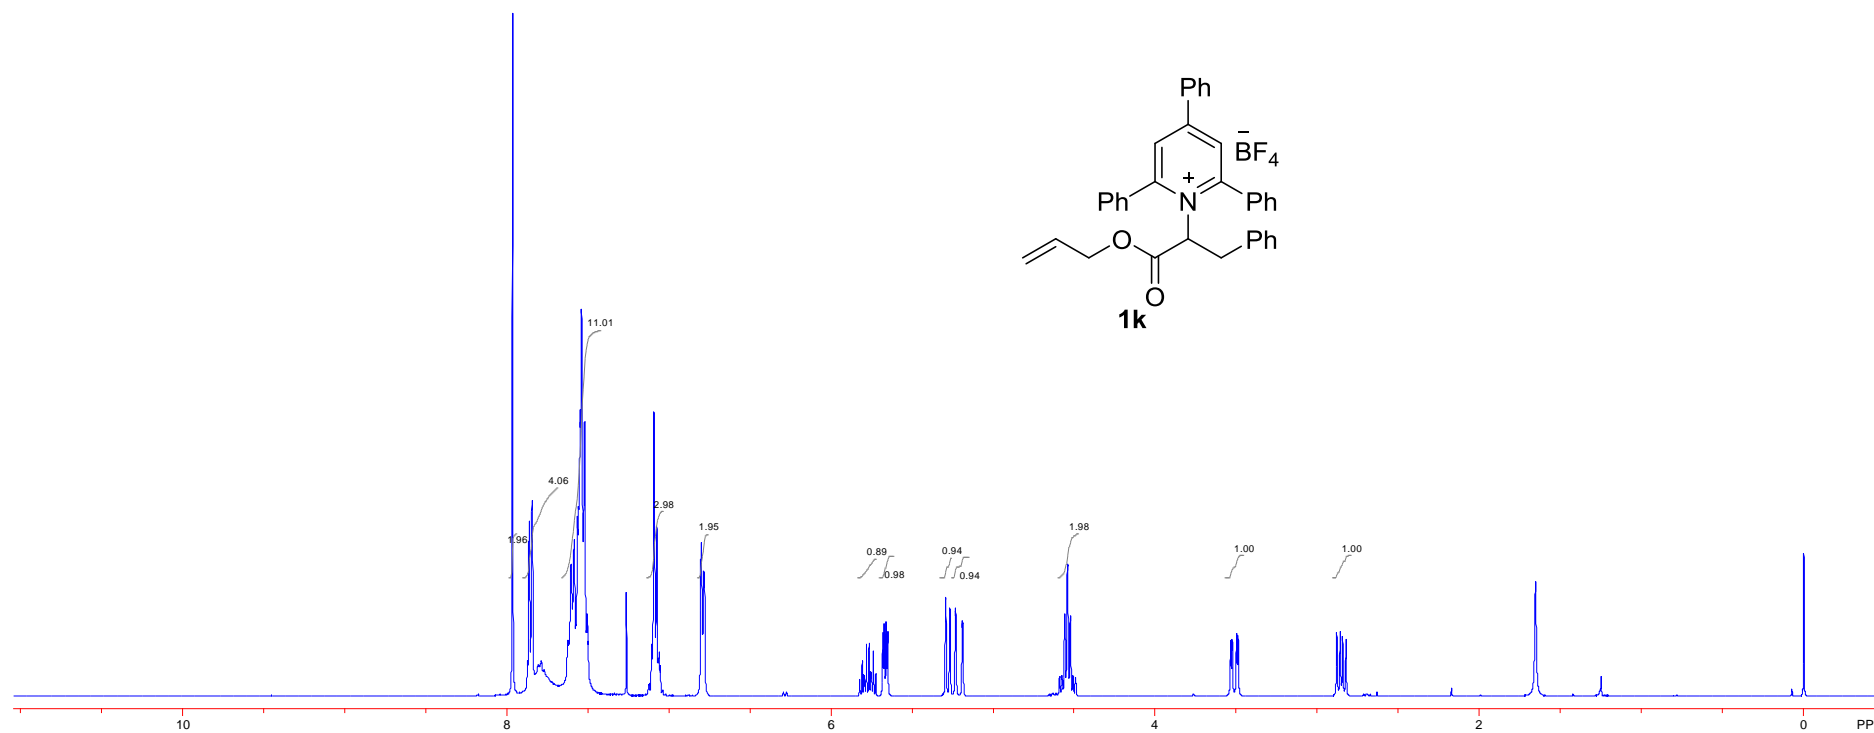



$^{13}\text{C}$  NMR (150 MHz,  $\text{CDCl}_3$ )

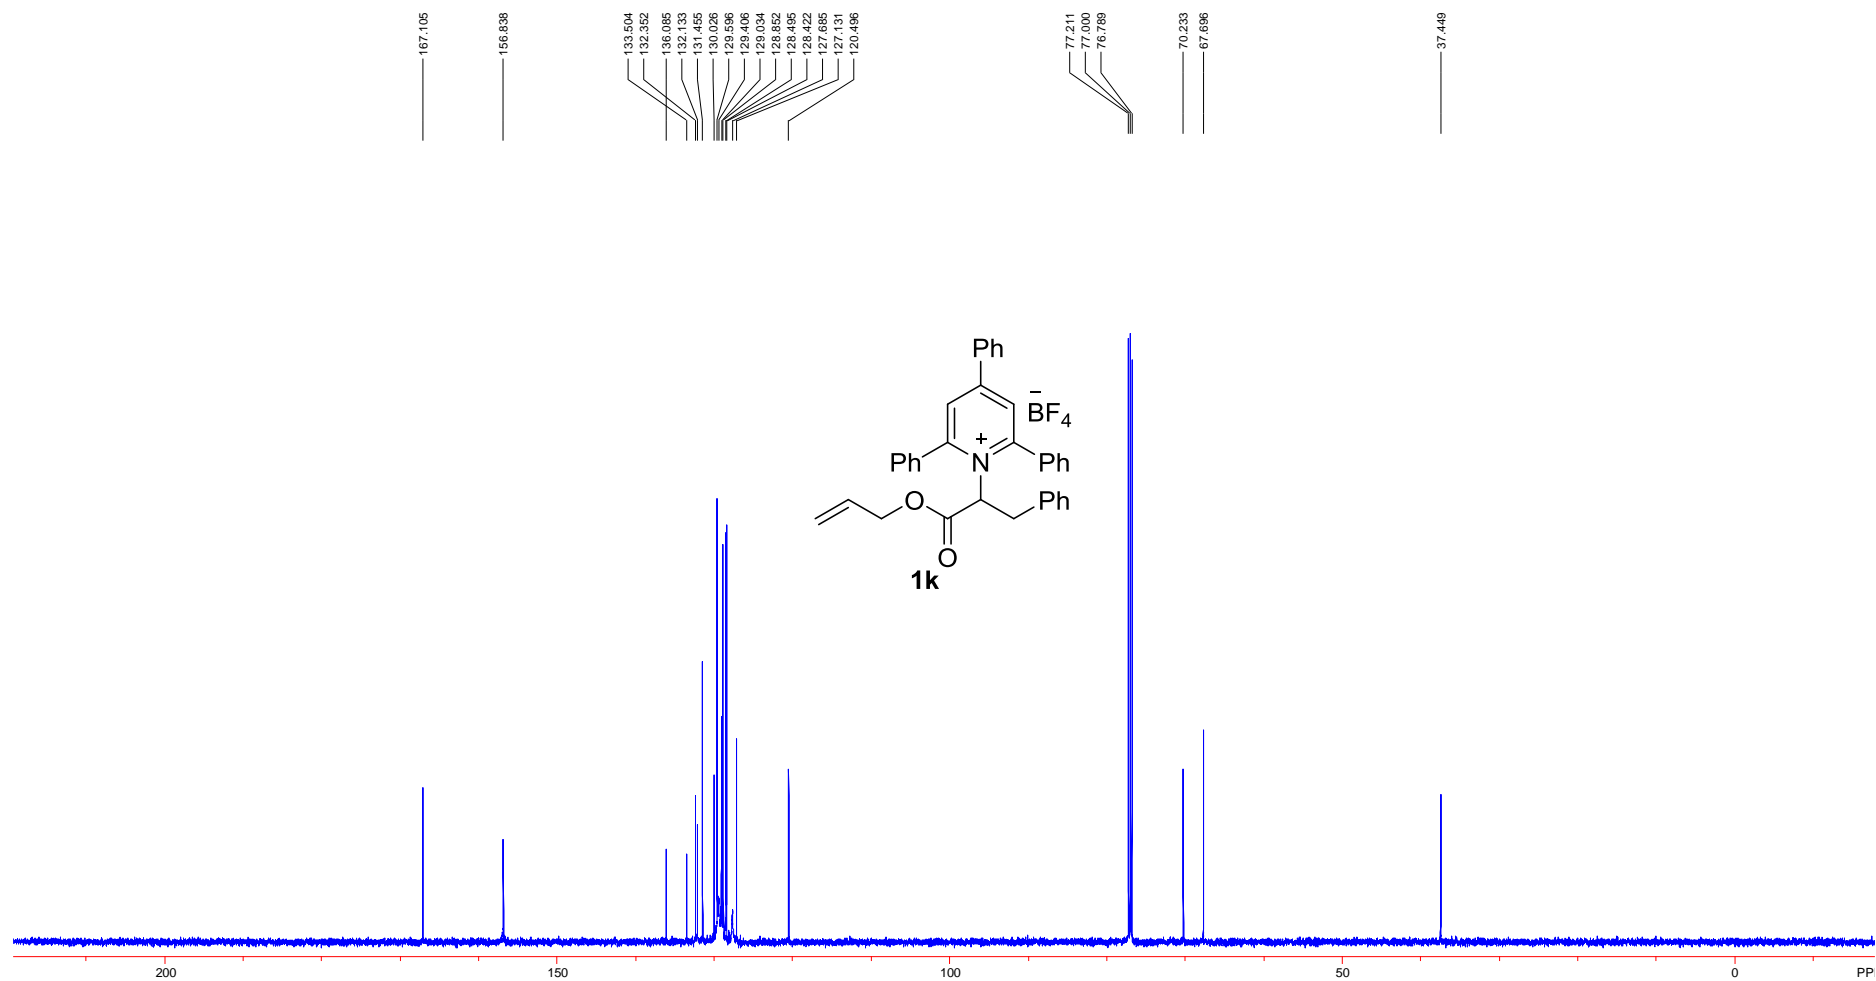

$^{19}\text{F}$  NMR(565 MHz,  $\text{CDCl}_3$ )

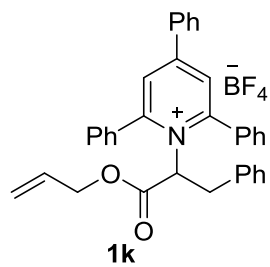

-152.718  
-152.772

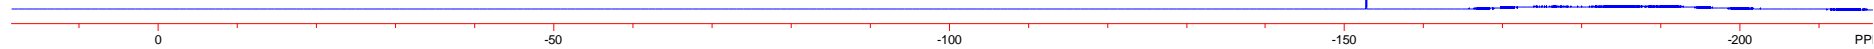

$^1\text{H NMR}$ (600 MHz,  $\text{CDCl}_3$ )

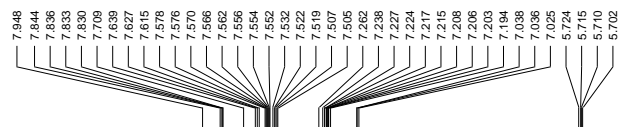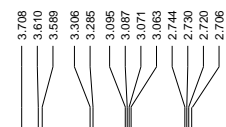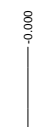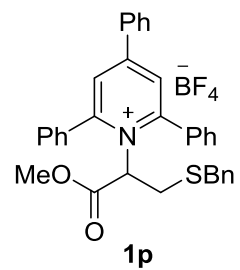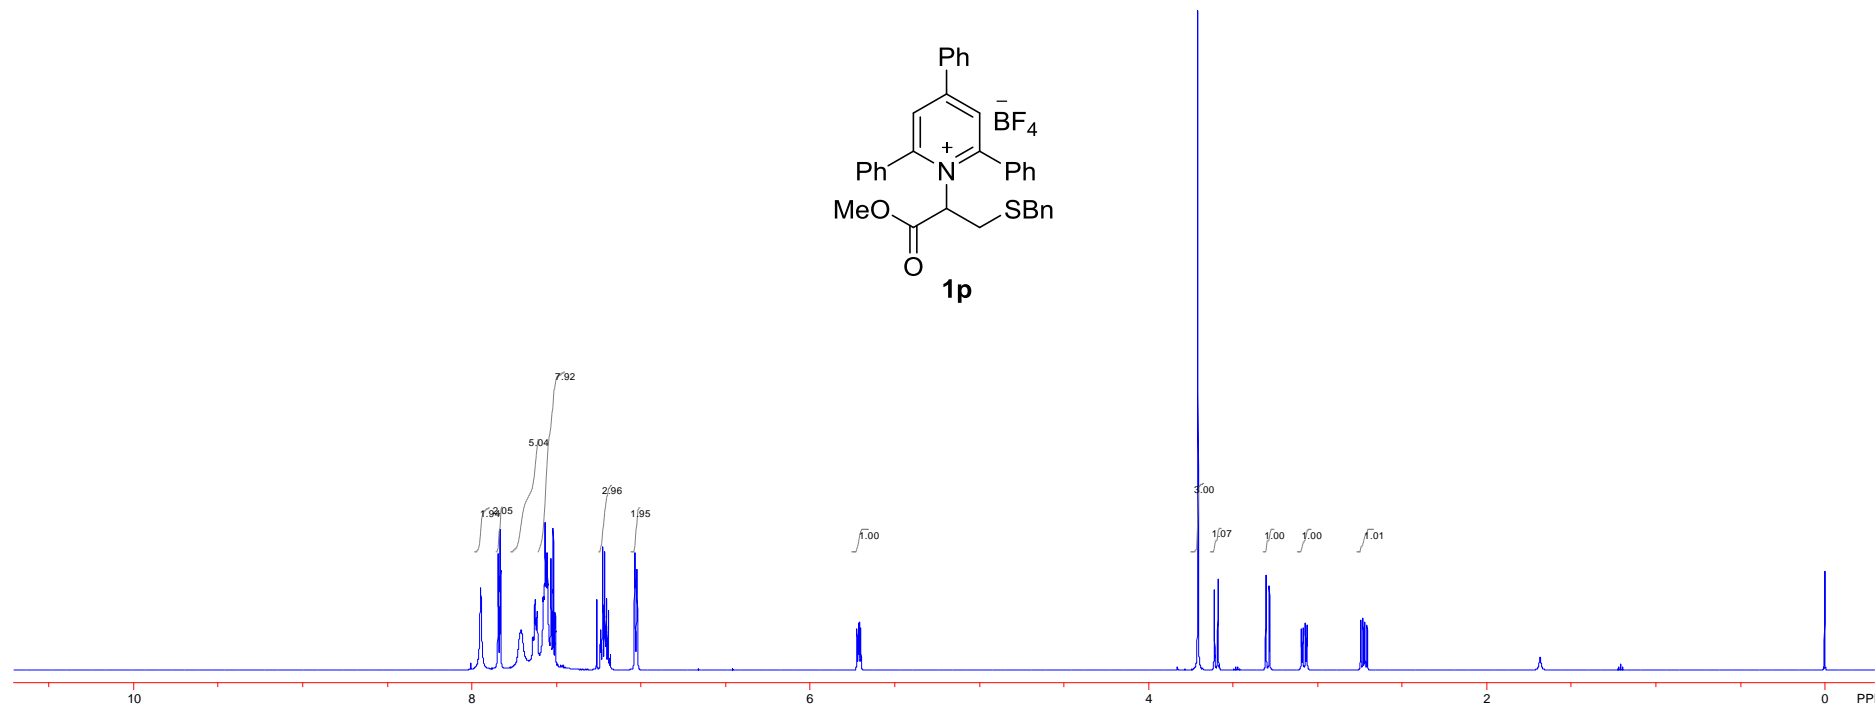

$^{13}\text{C}$  NMR (150 MHz,  $\text{CDCl}_3$ )

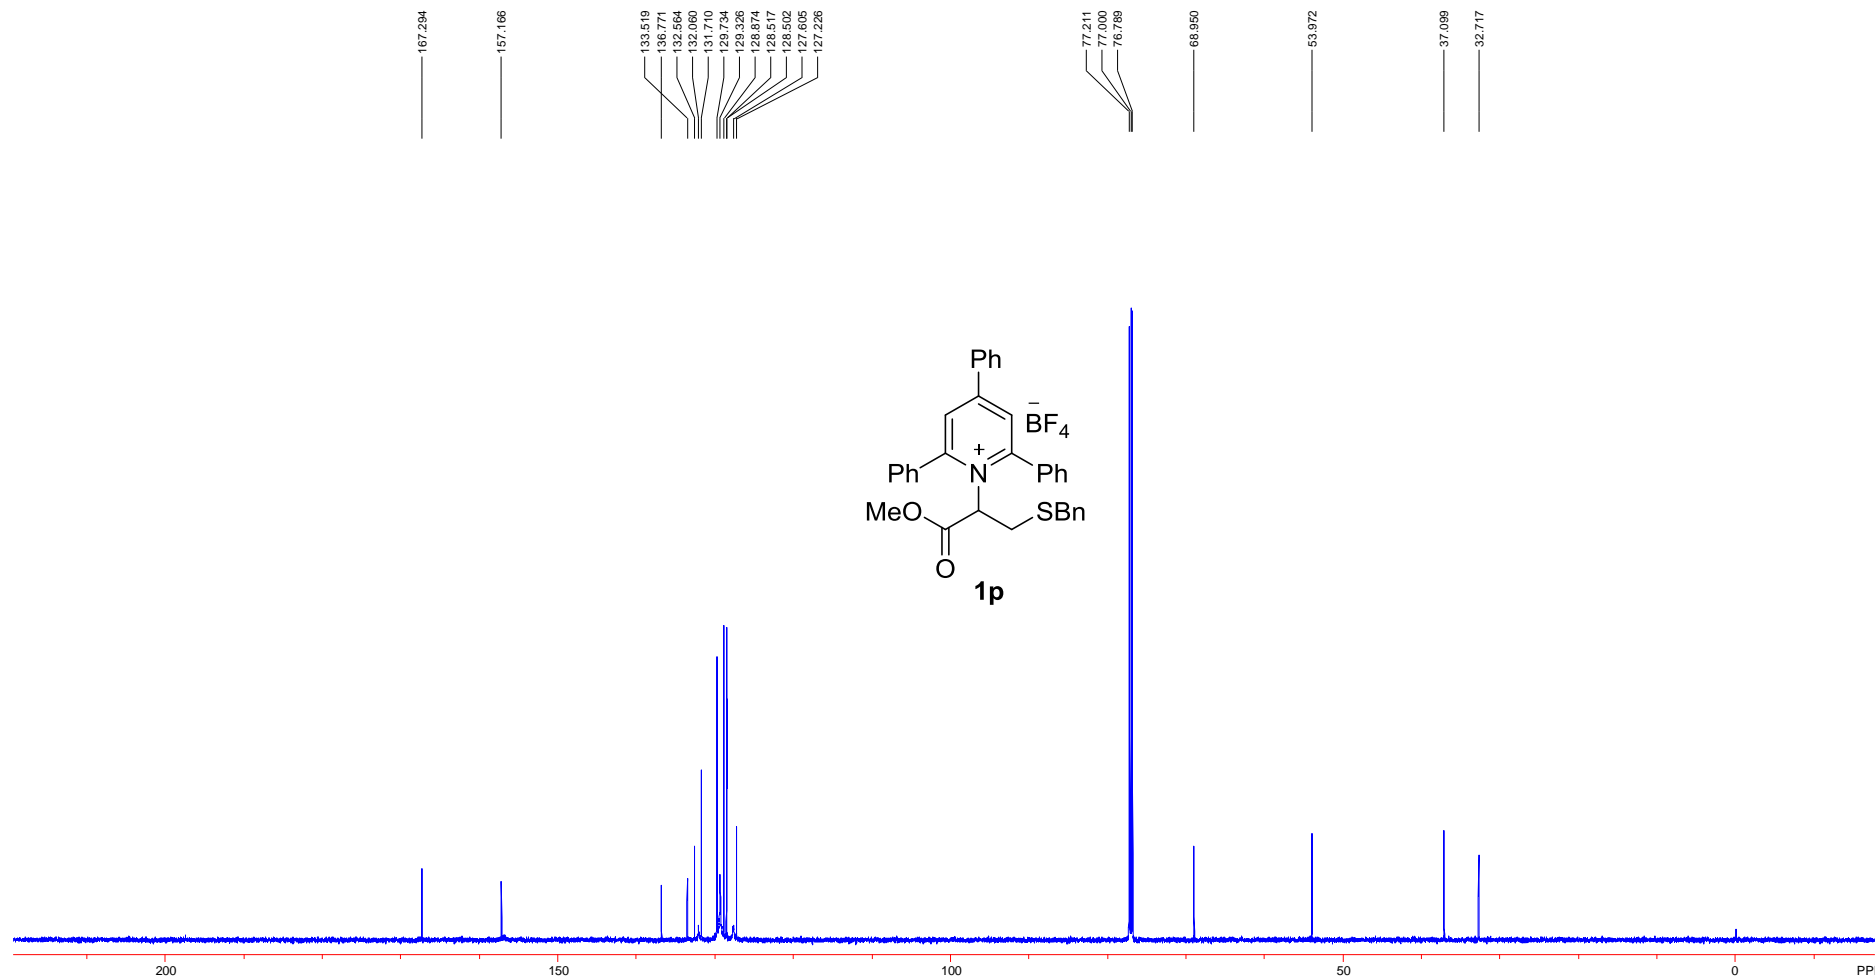

$^{19}\text{F}$  NMR (565 MHz,  $\text{CDCl}_3$ )

152.371  
152.425

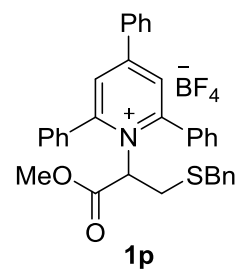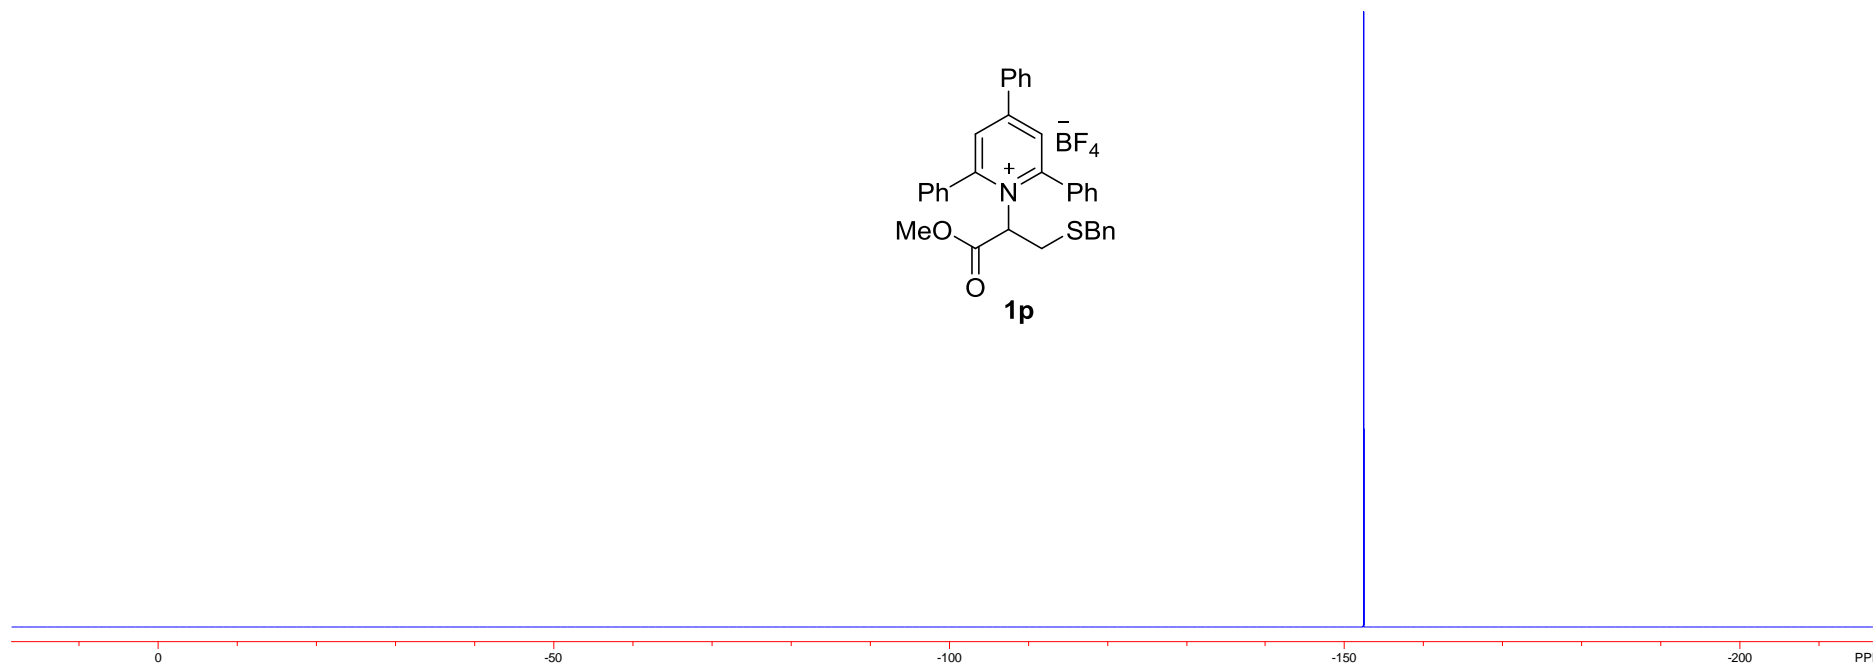

$^1\text{H}$  NMR(600 MHz,  $\text{CDCl}_3$ )

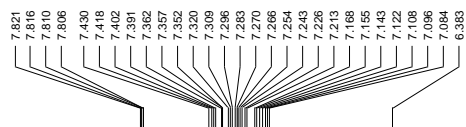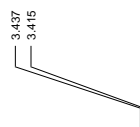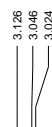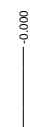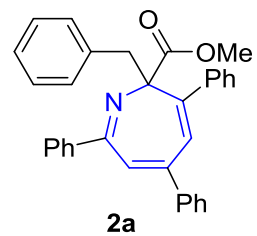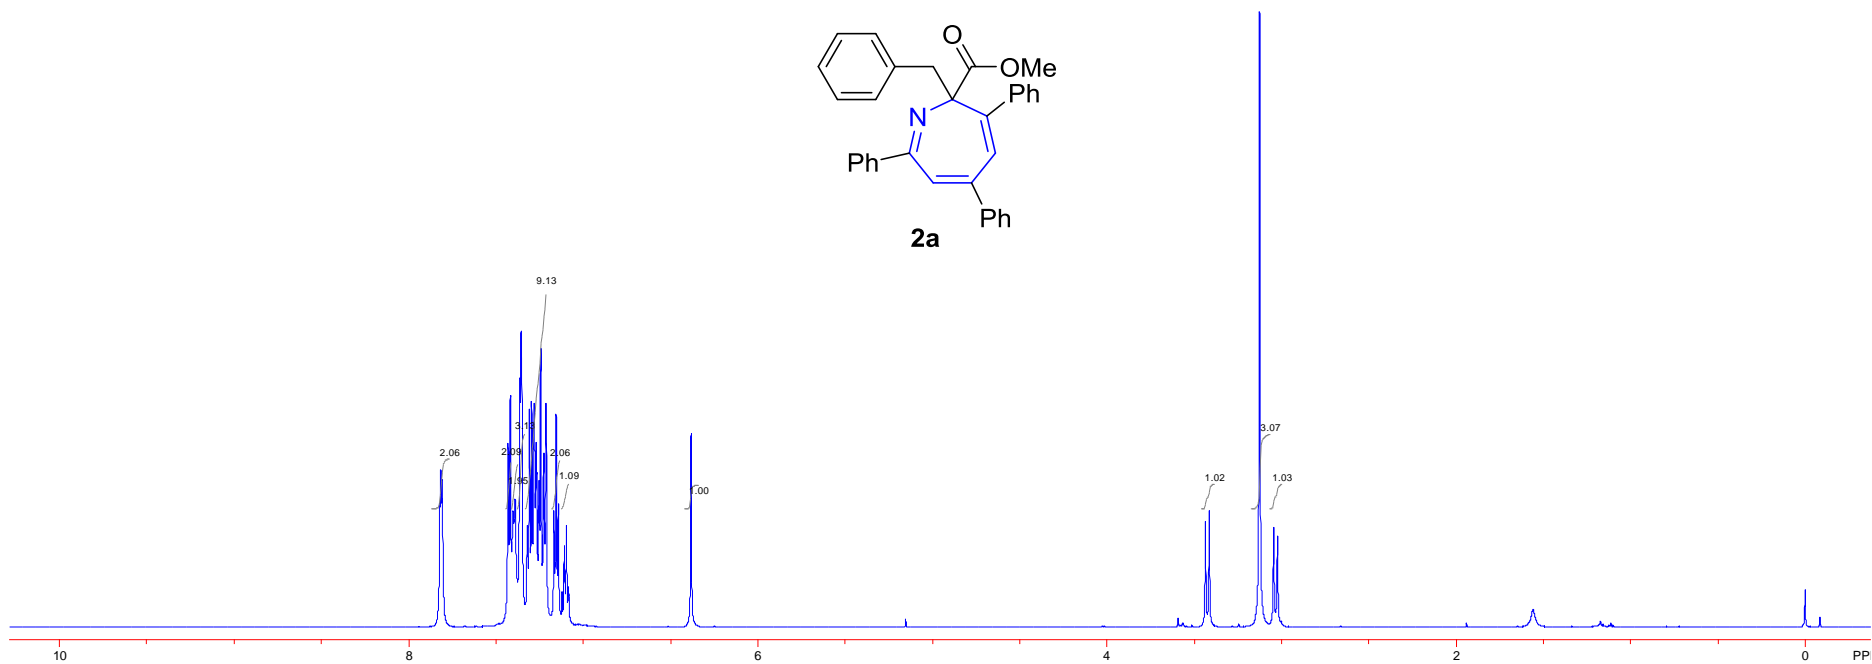

$^{13}\text{C}$  NMR (150 MHz,  $\text{CDCl}_3$ )

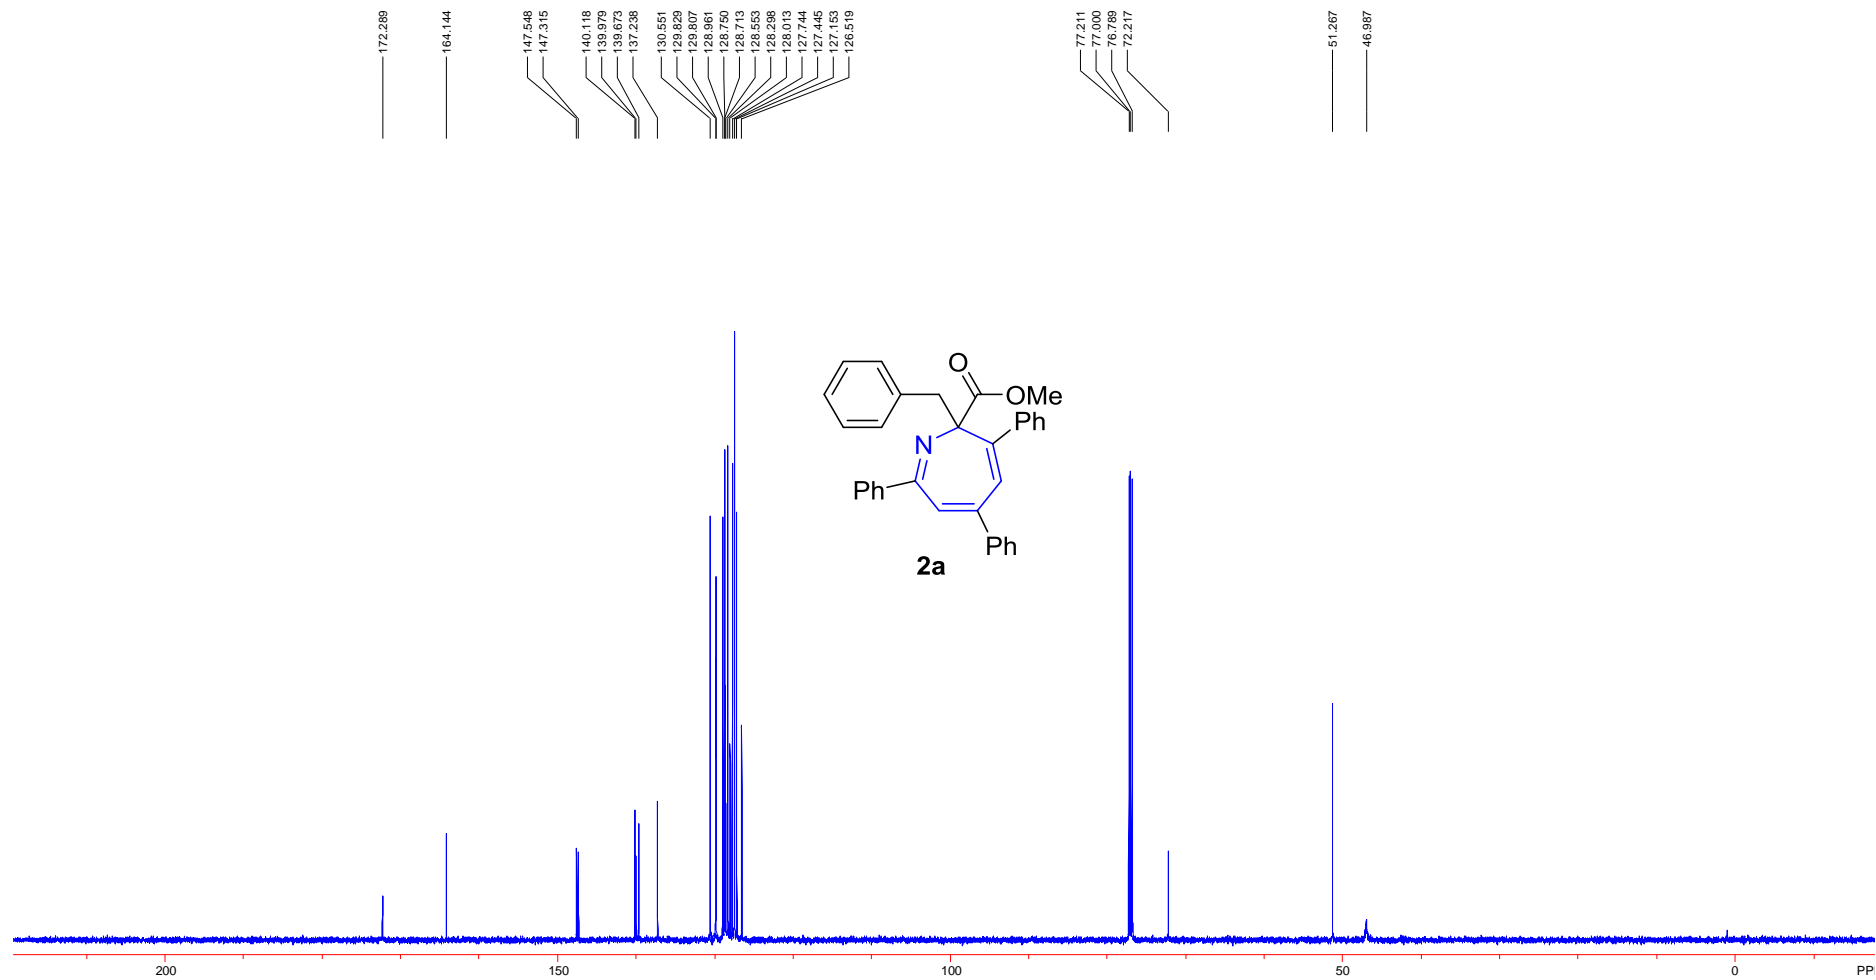

$^1\text{H NMR}$ (600 MHz,  $\text{CDCl}_3$ )

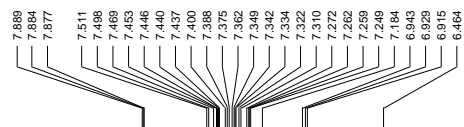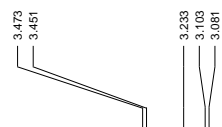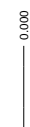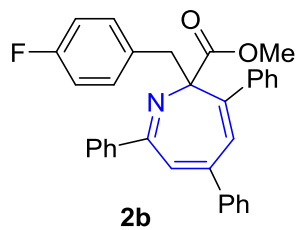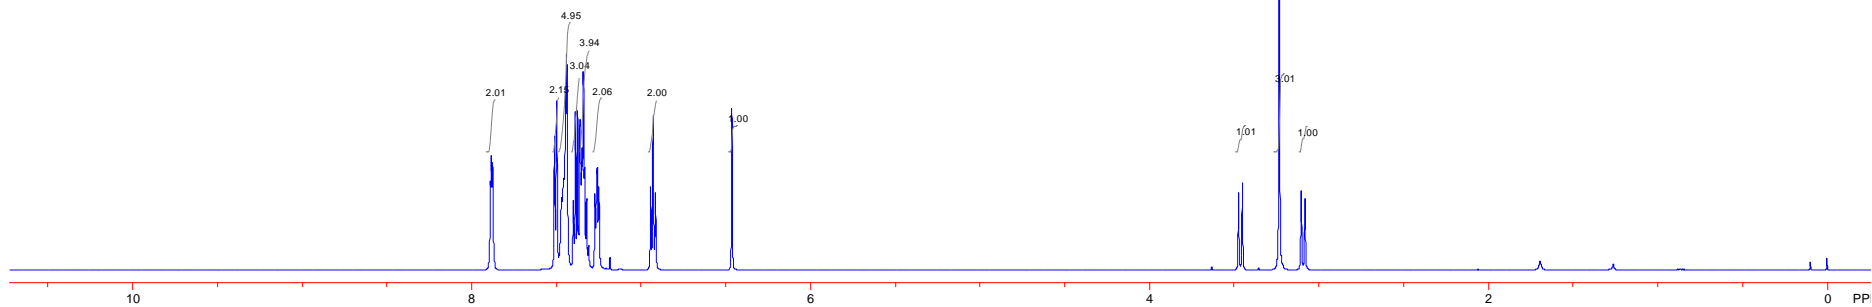



$^{13}\text{C}$  NMR (150 MHz,  $\text{CDCl}_3$ )

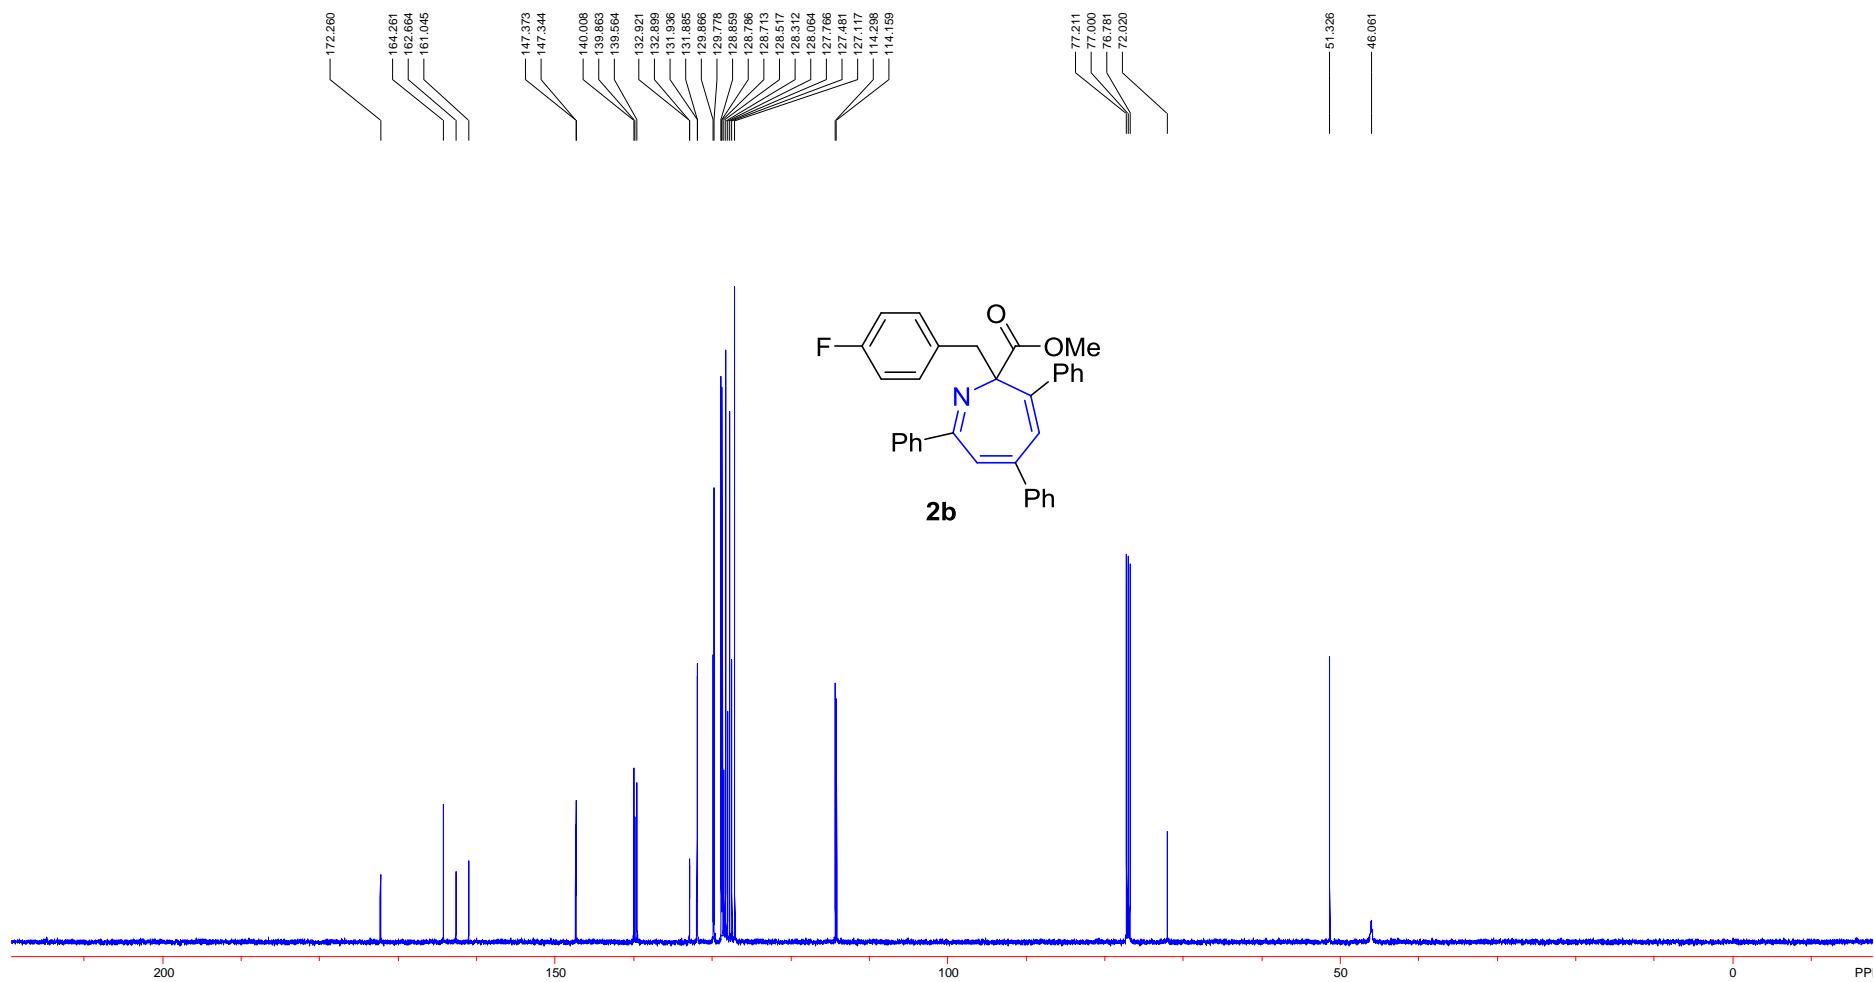

$^{19}\text{F}$  NMR (565 MHz,  $\text{CDCl}_3$ )

116.819

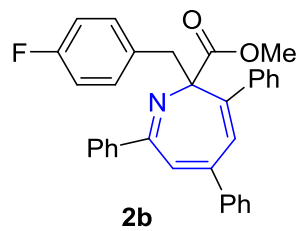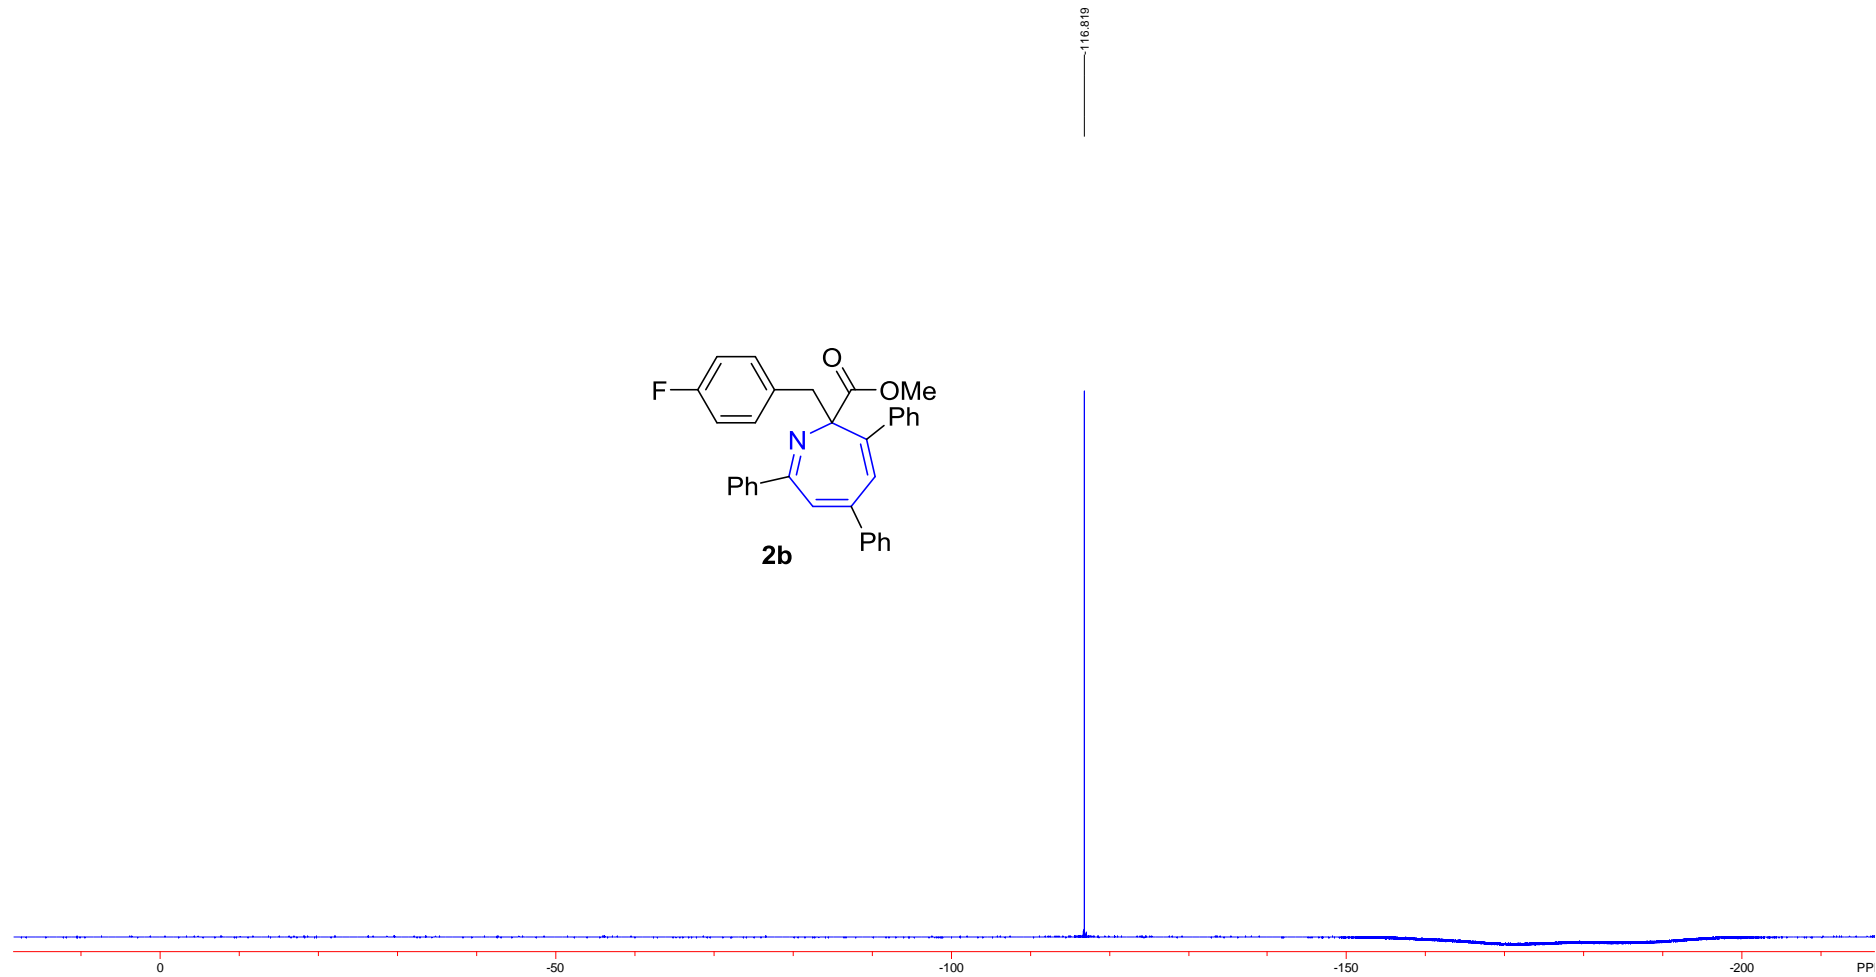

$^1\text{H}$  NMR(400 MHz,  $\text{CDCl}_3$ )

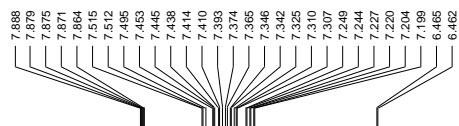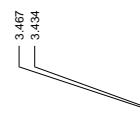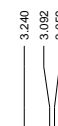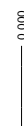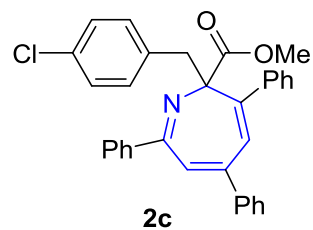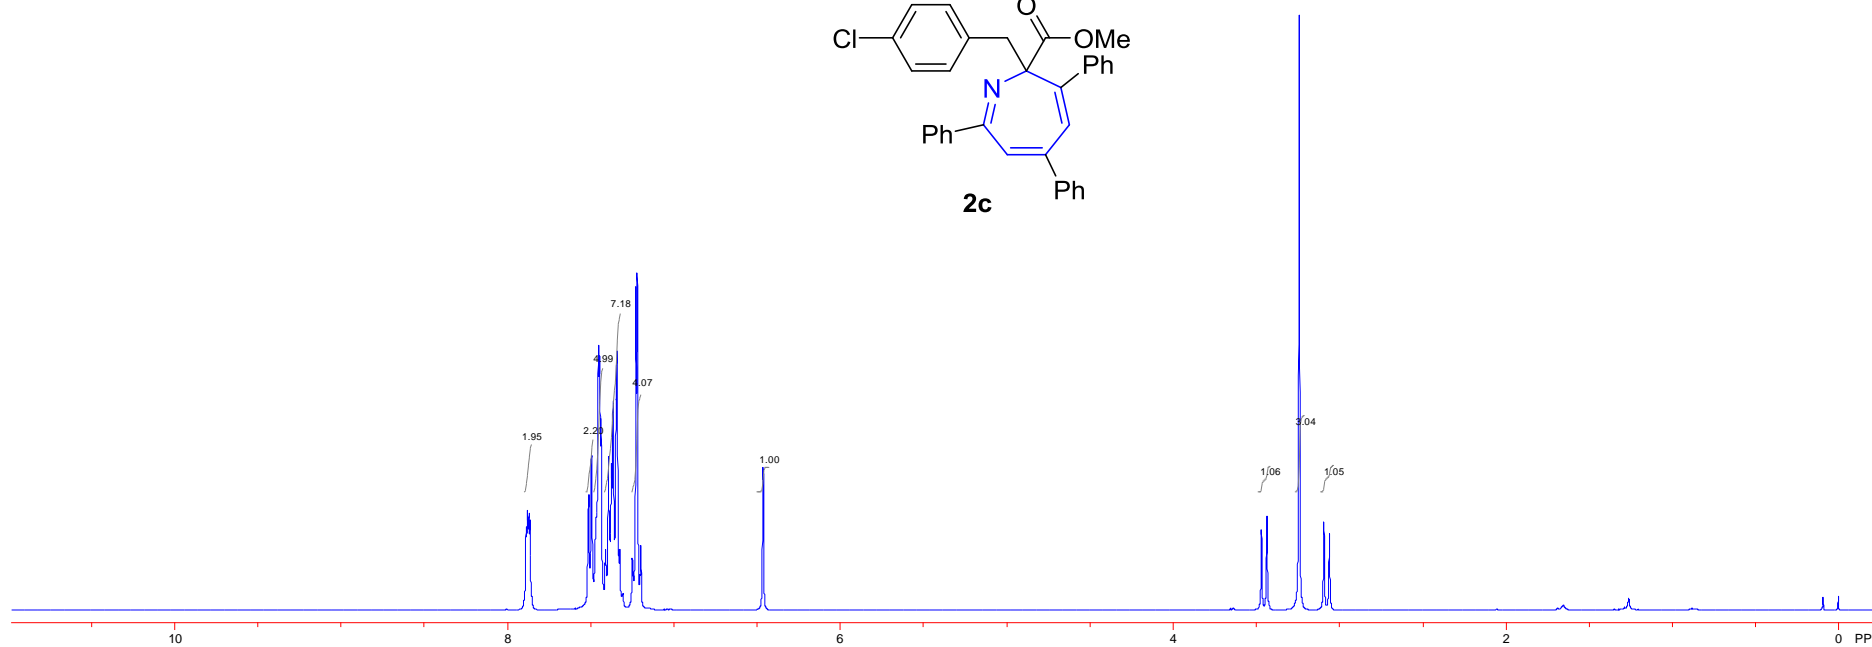

$^{13}\text{C}$  NMR (100 MHz,  $\text{CDCl}_3$ )

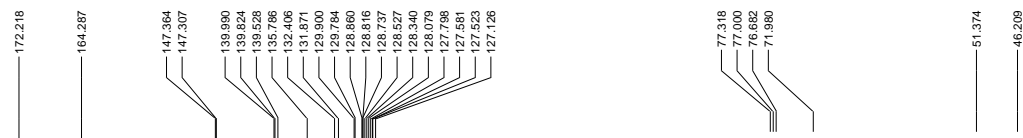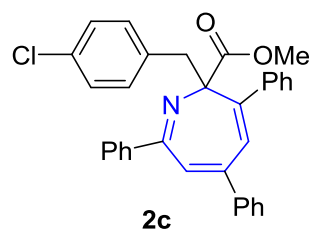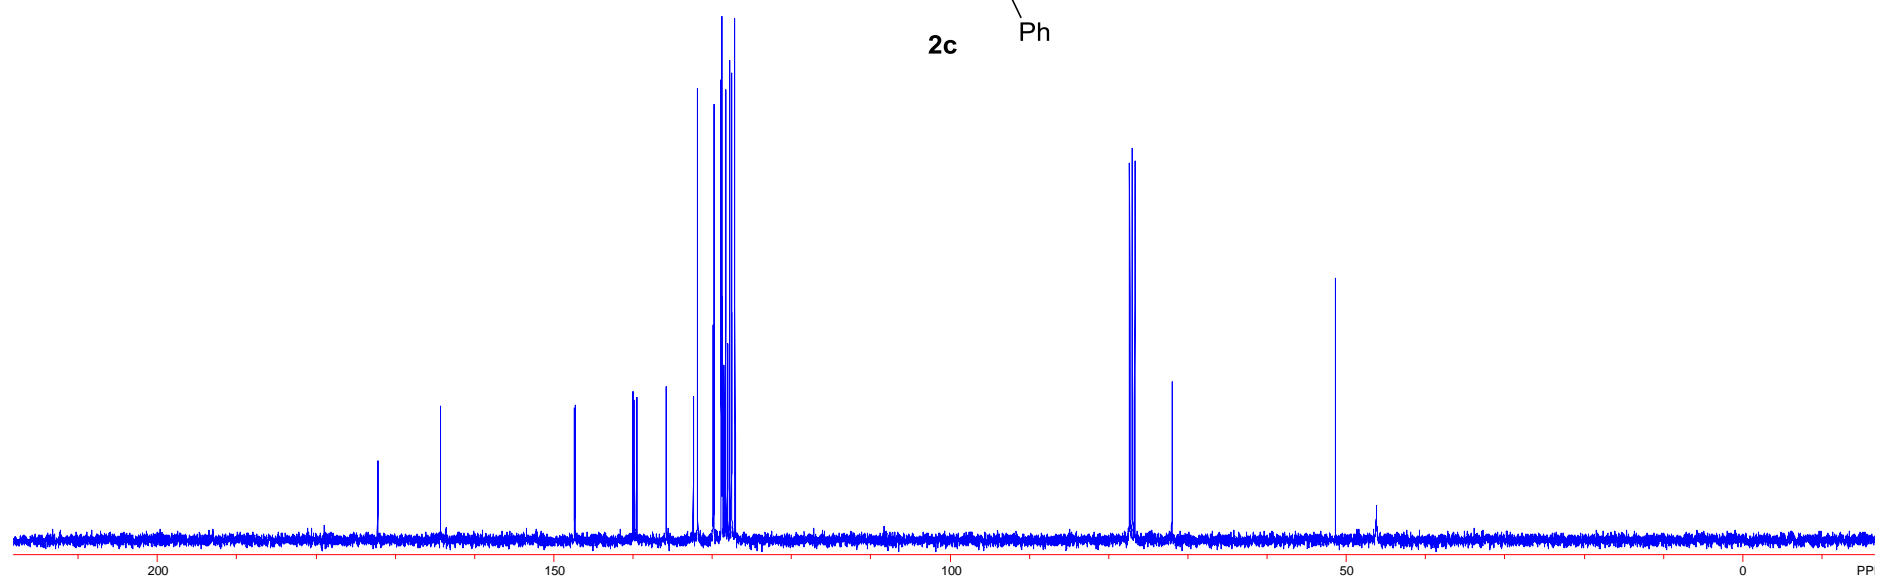

$^1\text{H}$  NMR(600 MHz,  $\text{CDCl}_3$ )

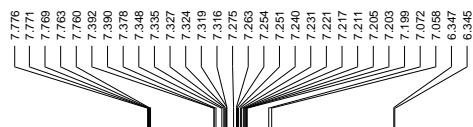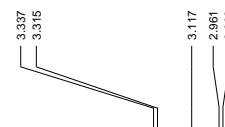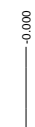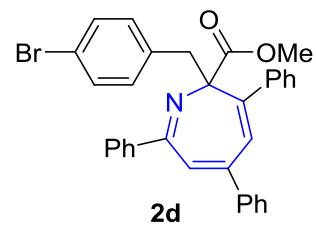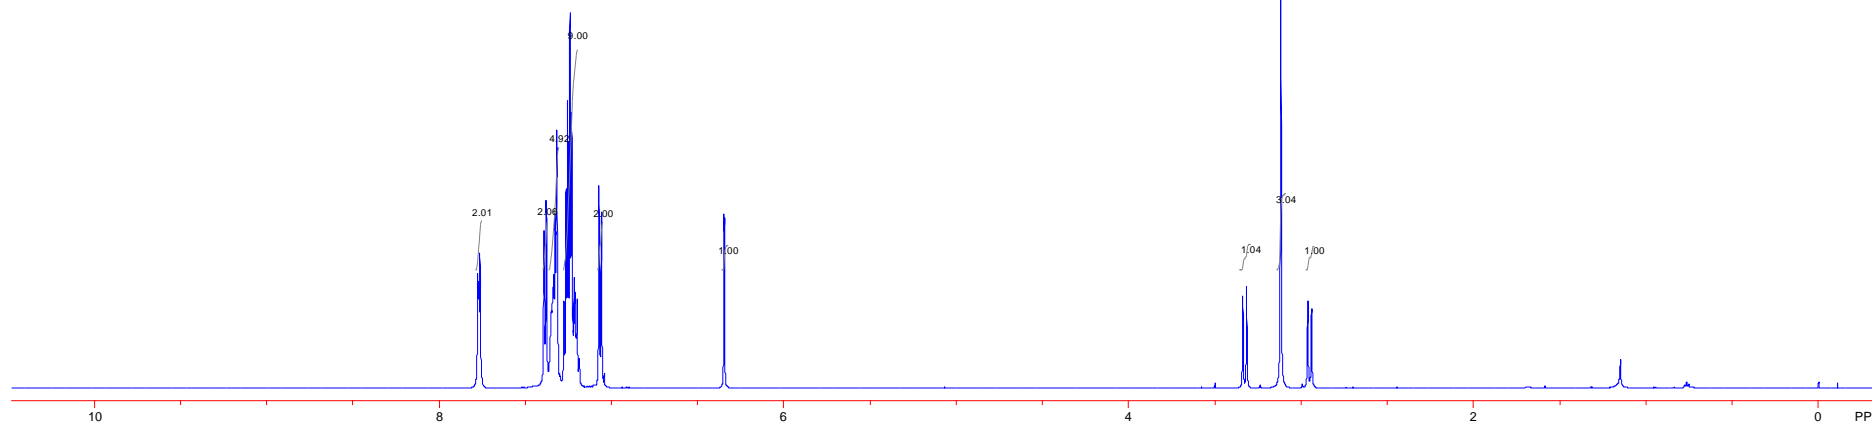

$^{13}\text{C}$  NMR (100 MHz,  $\text{CDCl}_3$ )

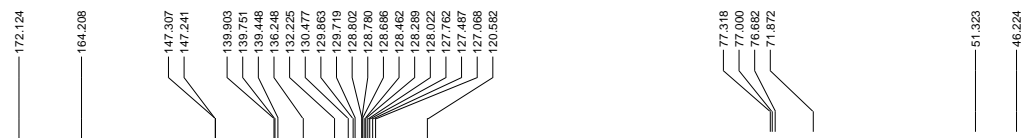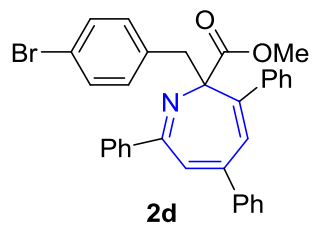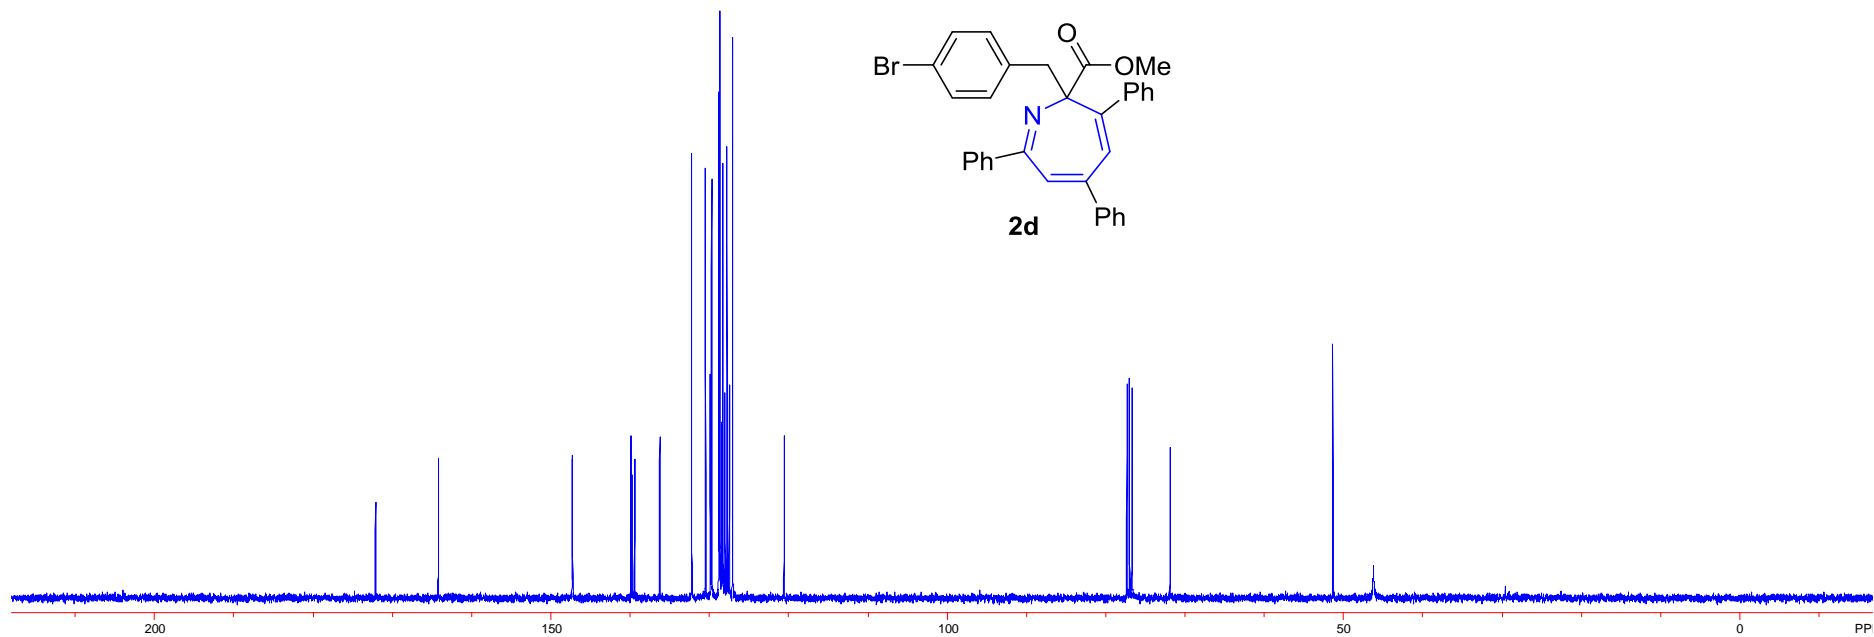

$^1\text{H}$  NMR(600 MHz,  $\text{CDCl}_3$ )

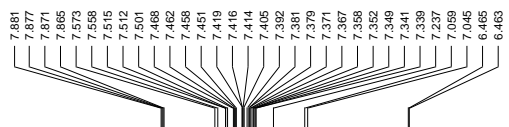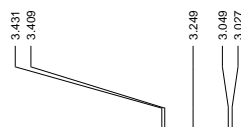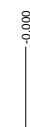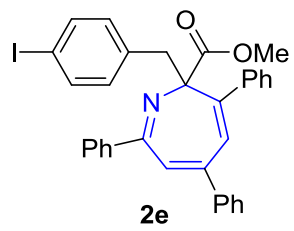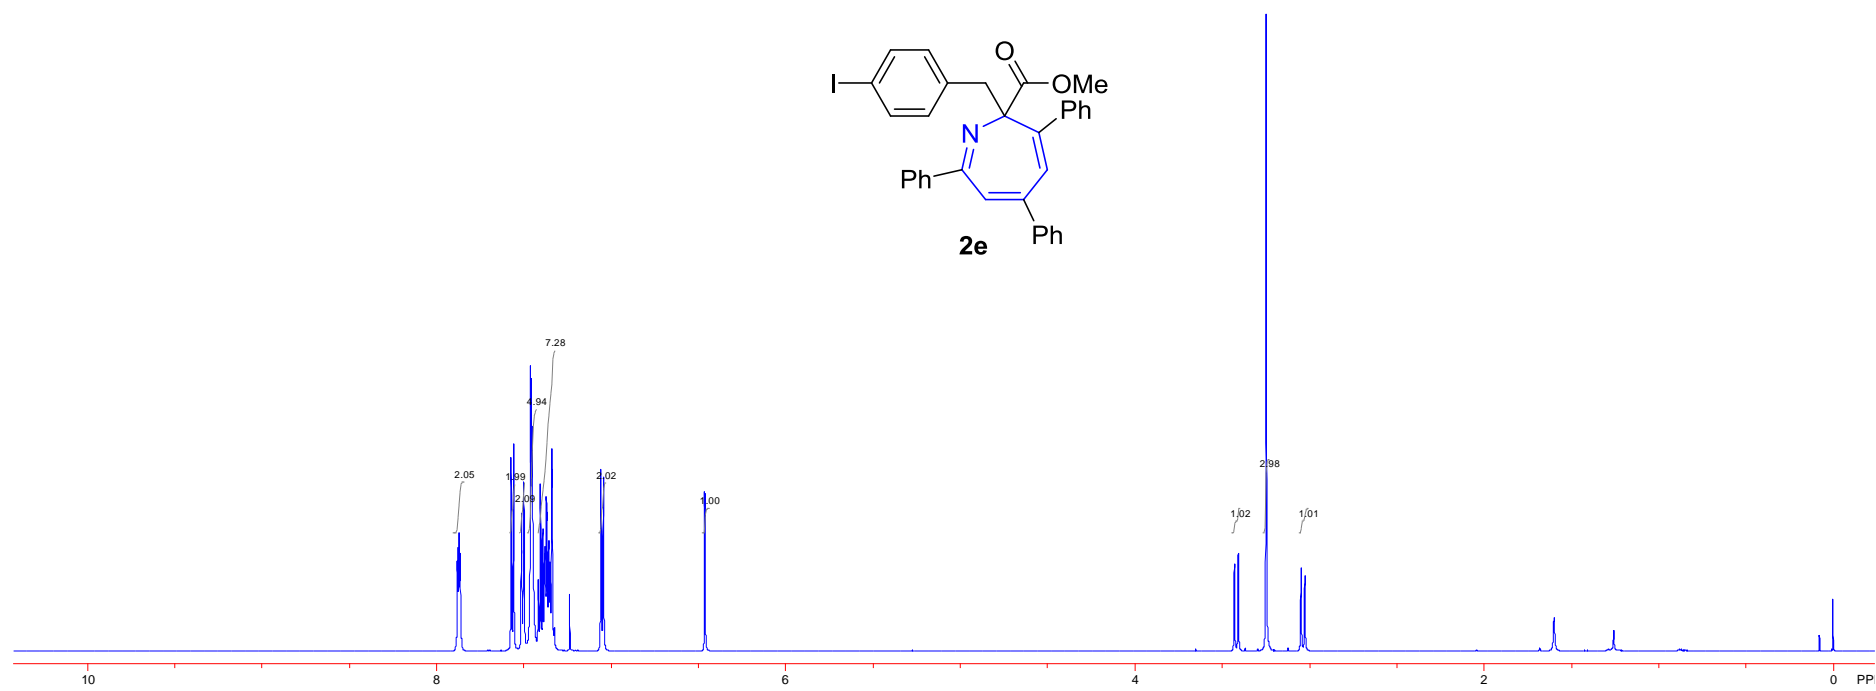

$^{13}\text{C}$  NMR (150 MHz,  $\text{CDCl}_3$ )

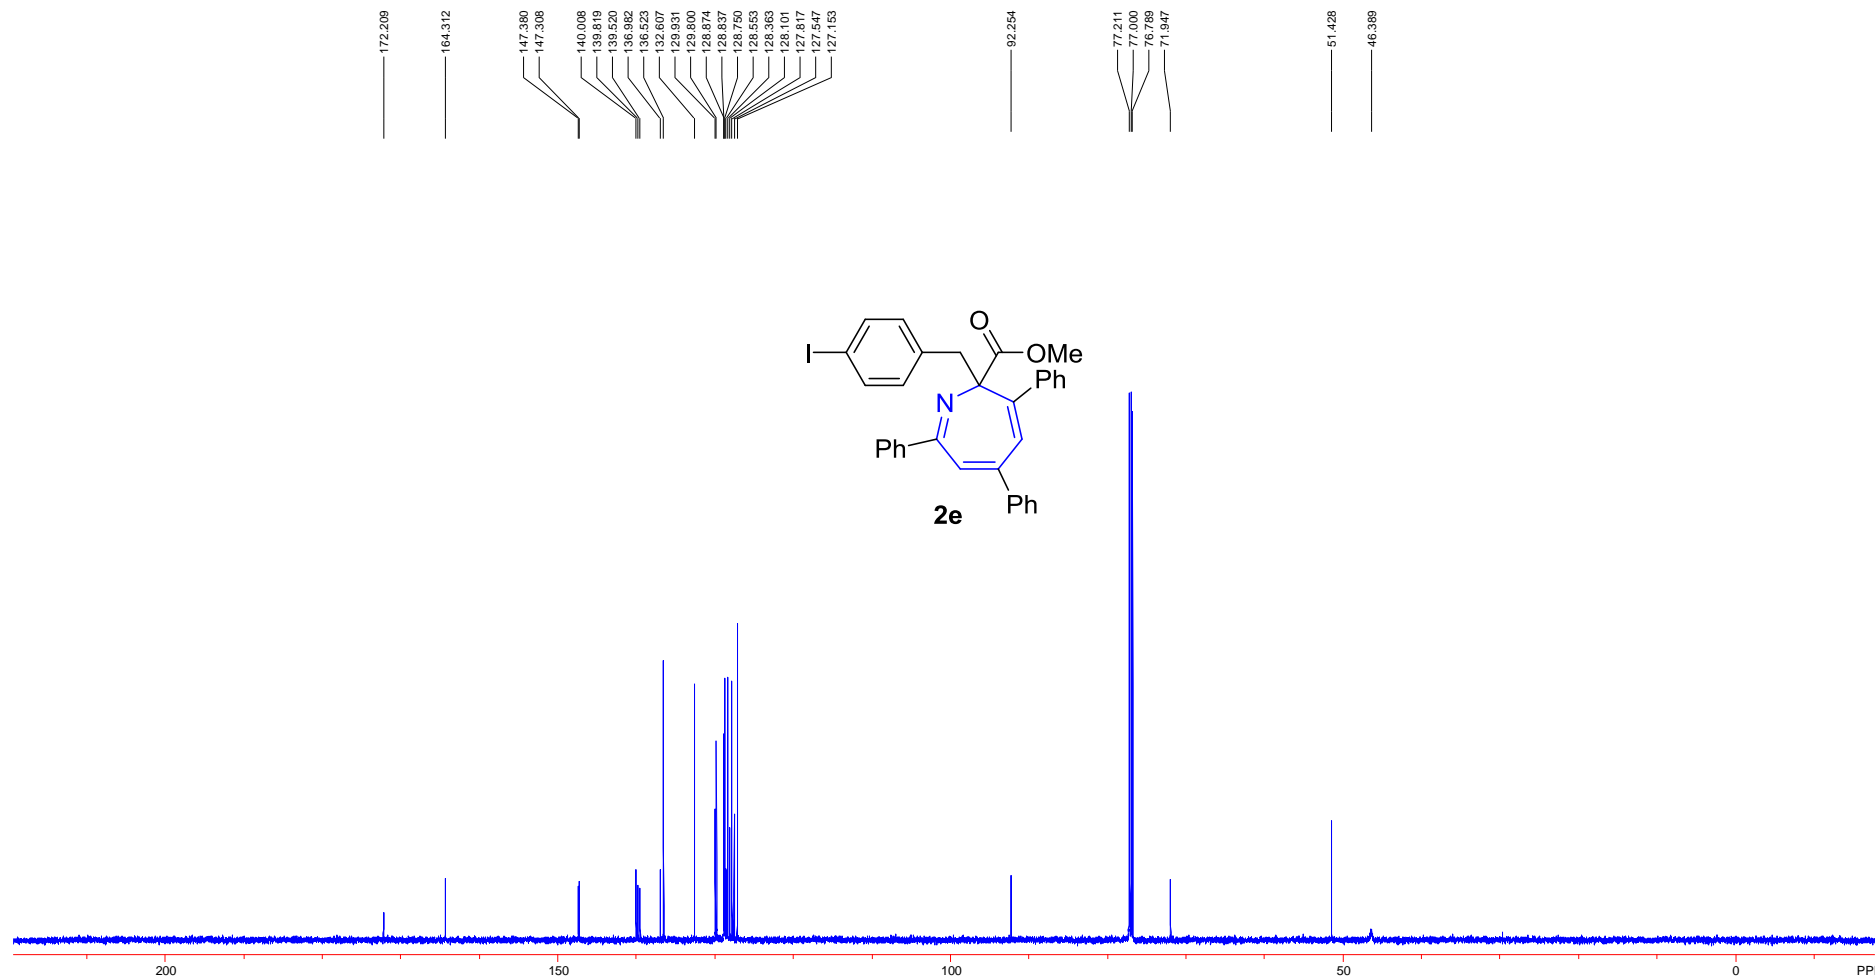



$^1\text{H}$  NMR(400 MHz,  $\text{CDCl}_3$ )

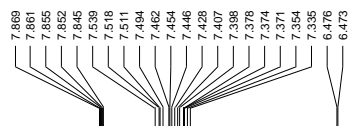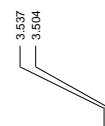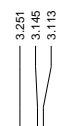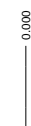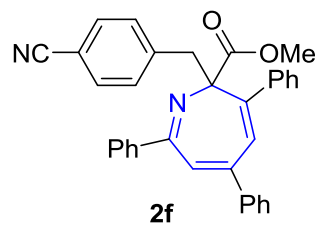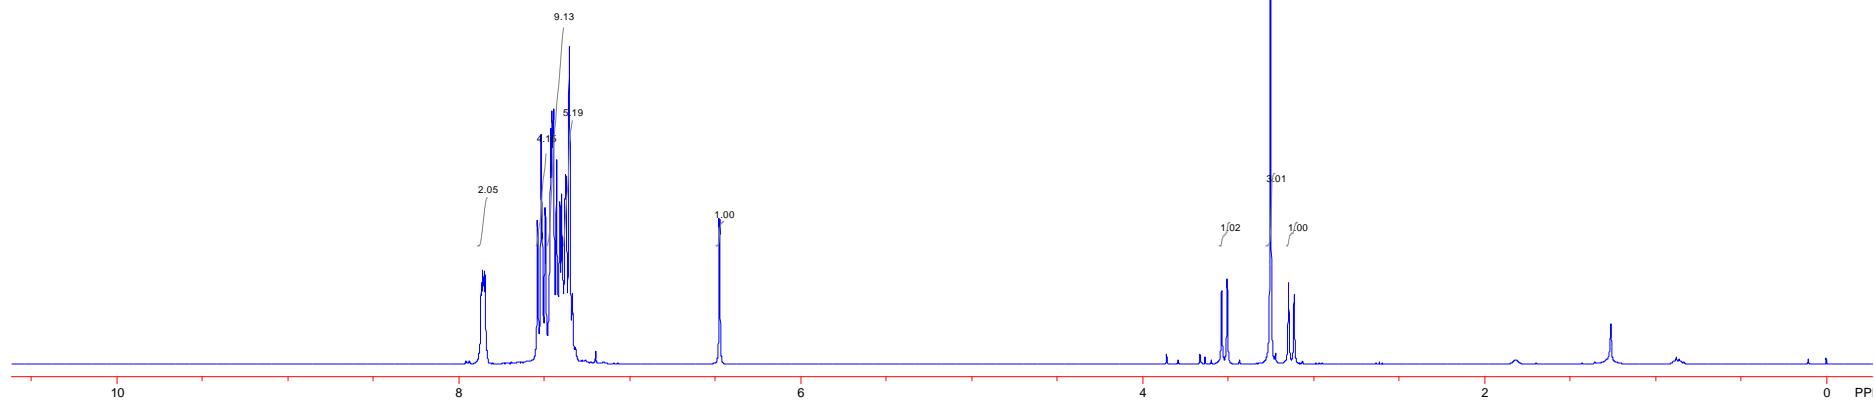

$^{13}\text{C}$  NMR (100 MHz,  $\text{CDCl}_3$ )

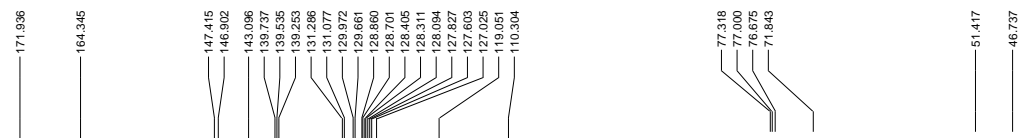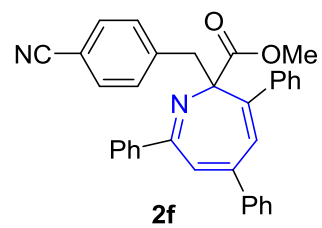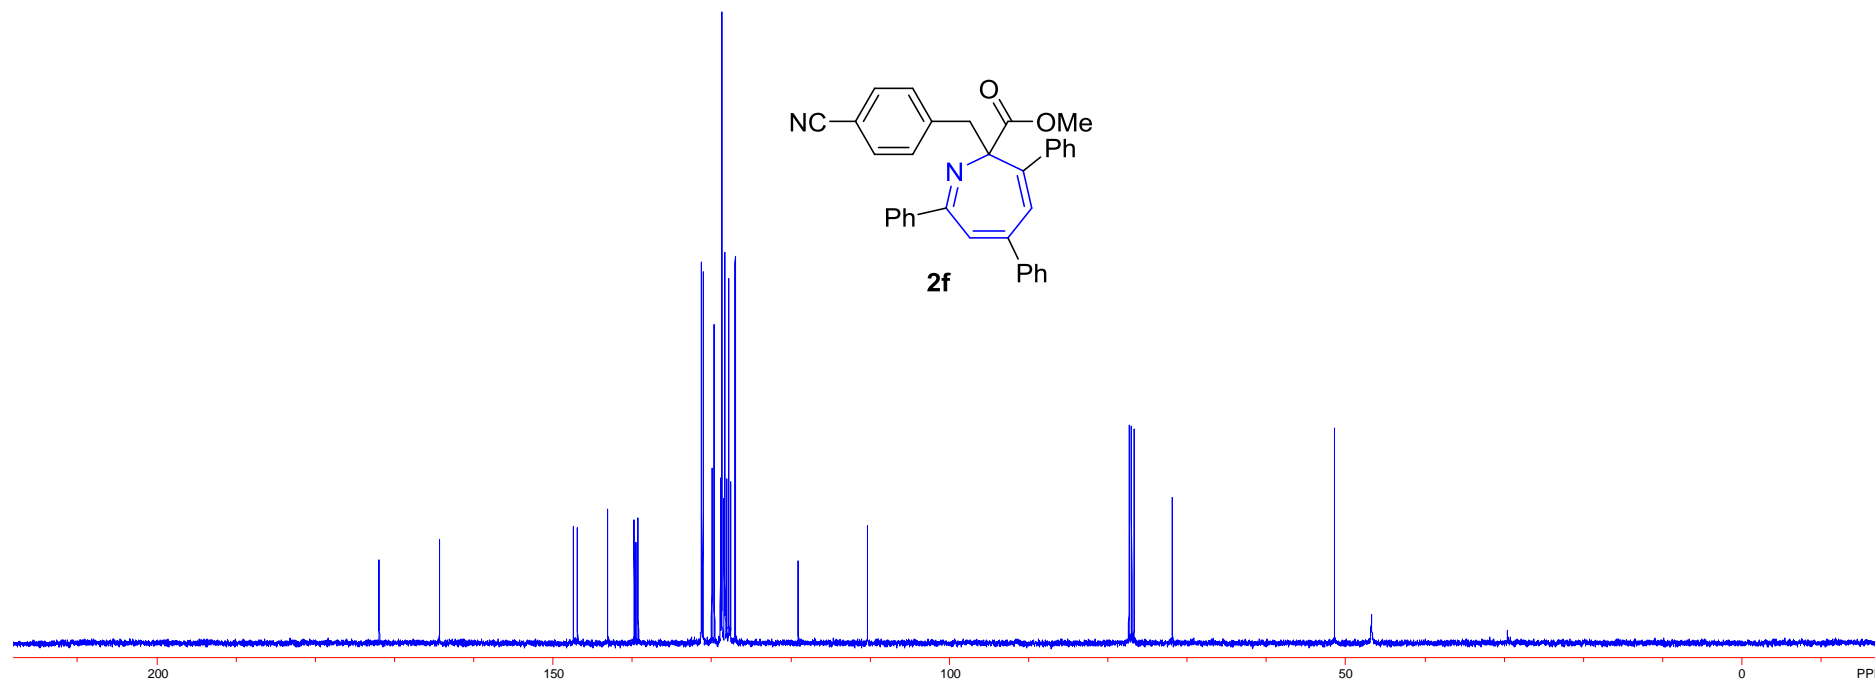

$^1\text{H NMR}$ (400 MHz,  $\text{CDCl}_3$ )

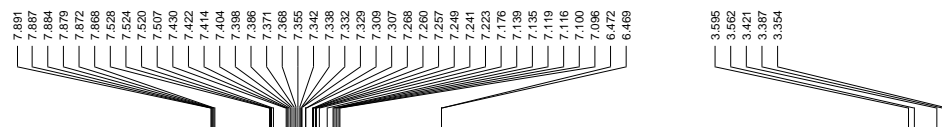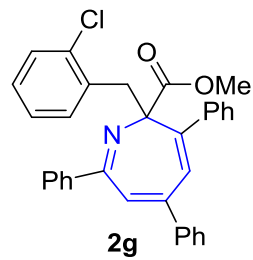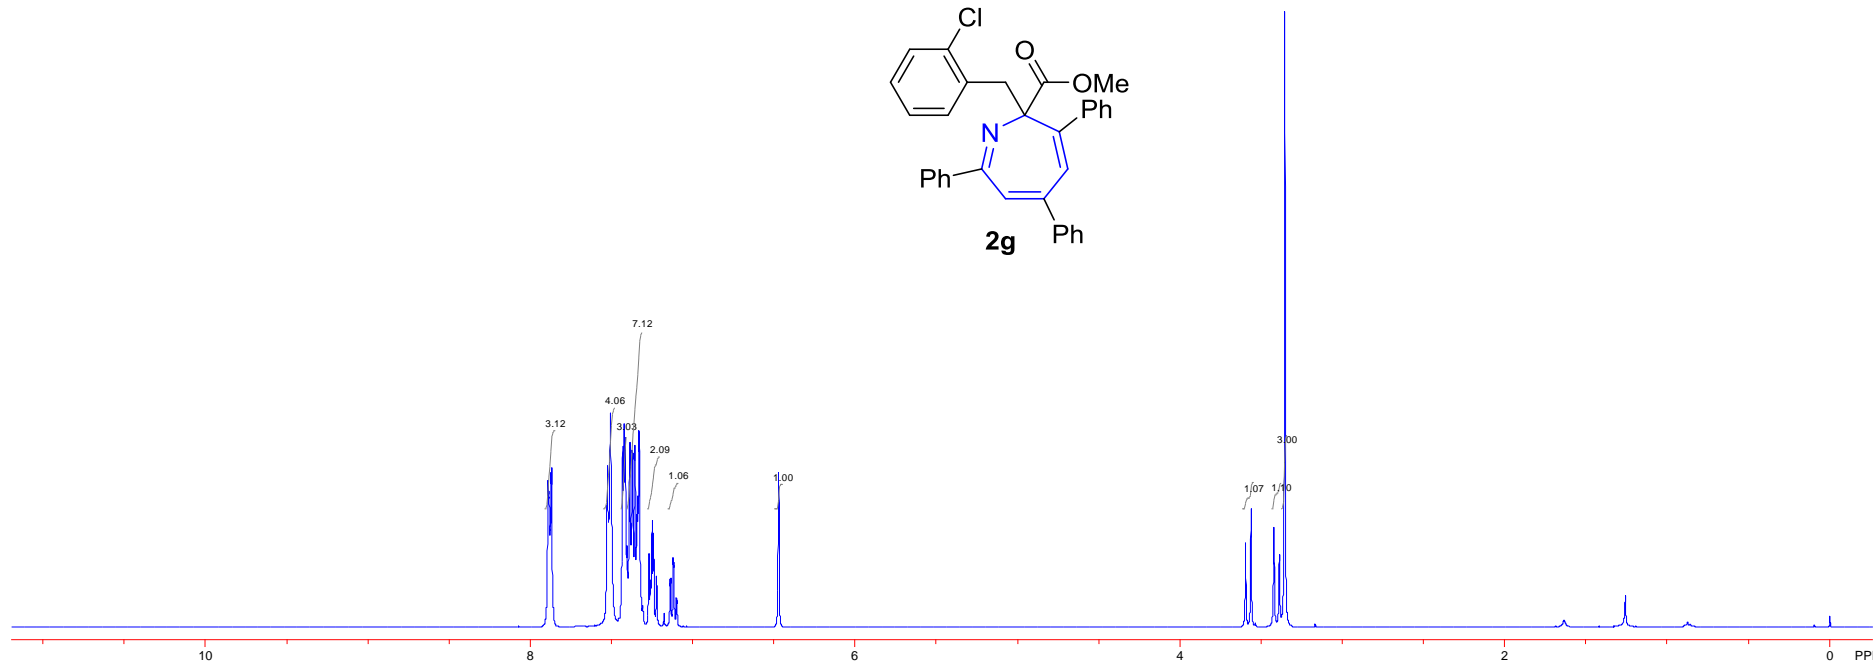

$^{13}\text{C}$  NMR (100 MHz,  $\text{CDCl}_3$ )

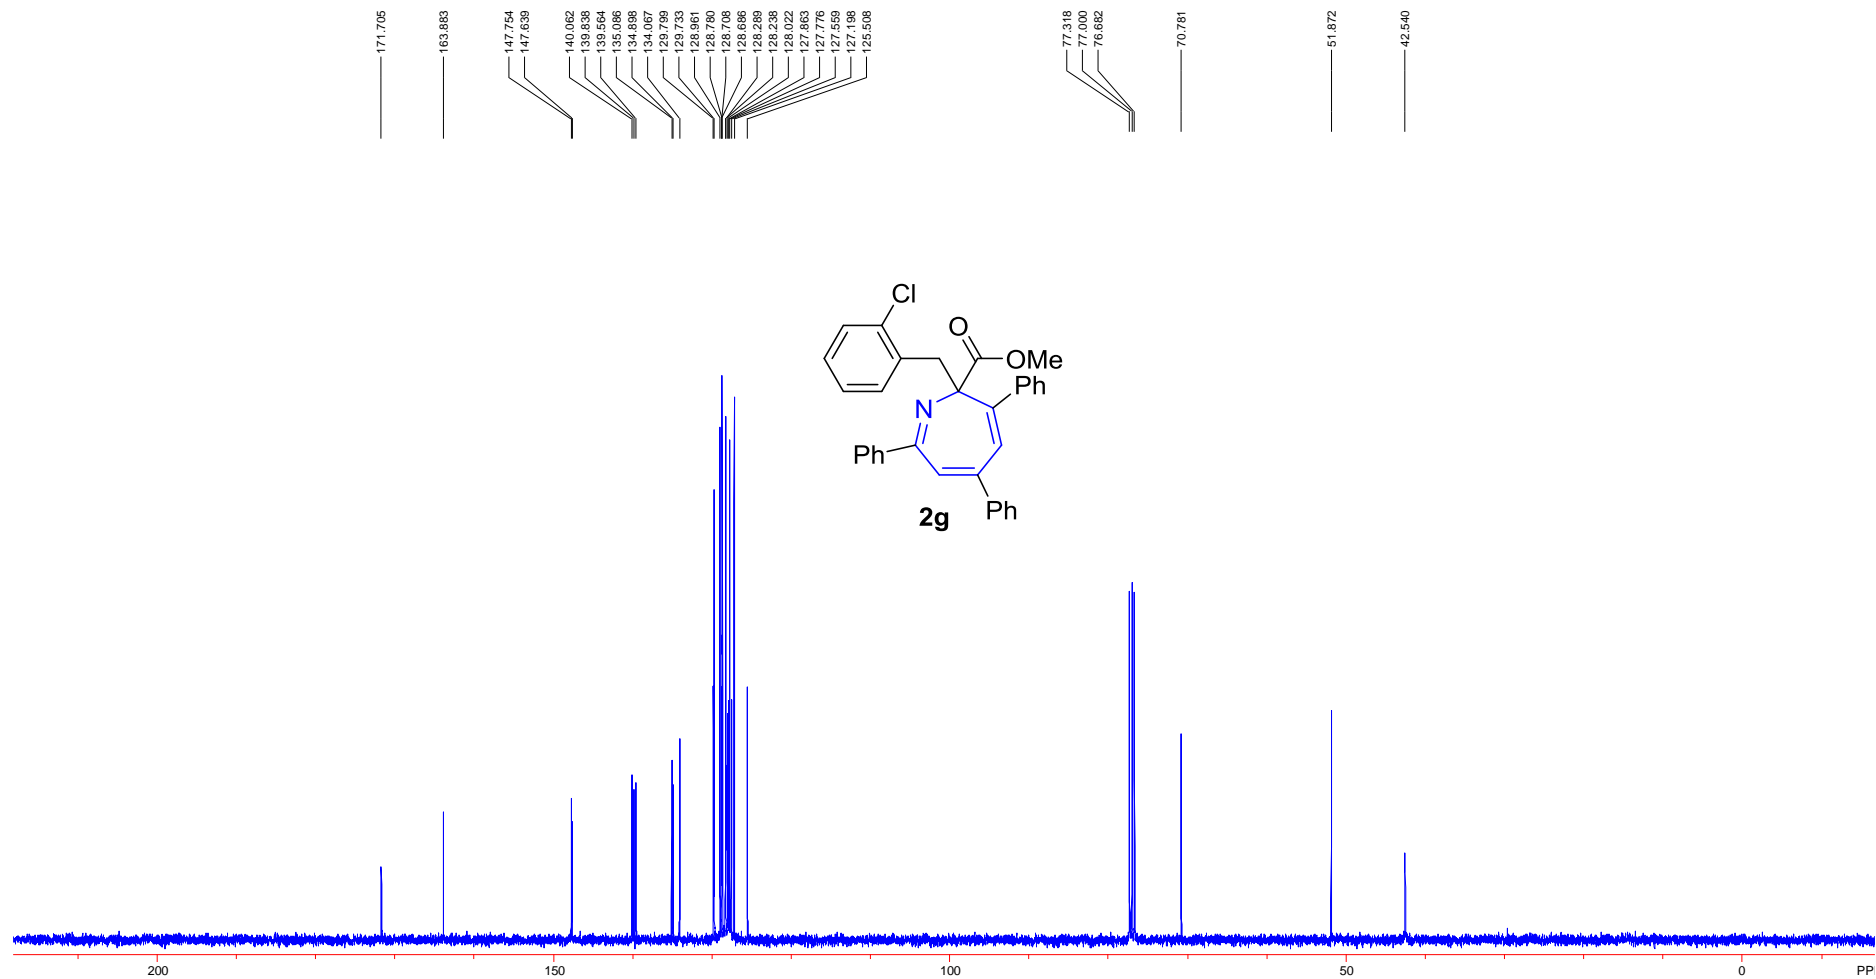

$^1\text{H NMR}$ (600 MHz,  $\text{CDCl}_3$ )

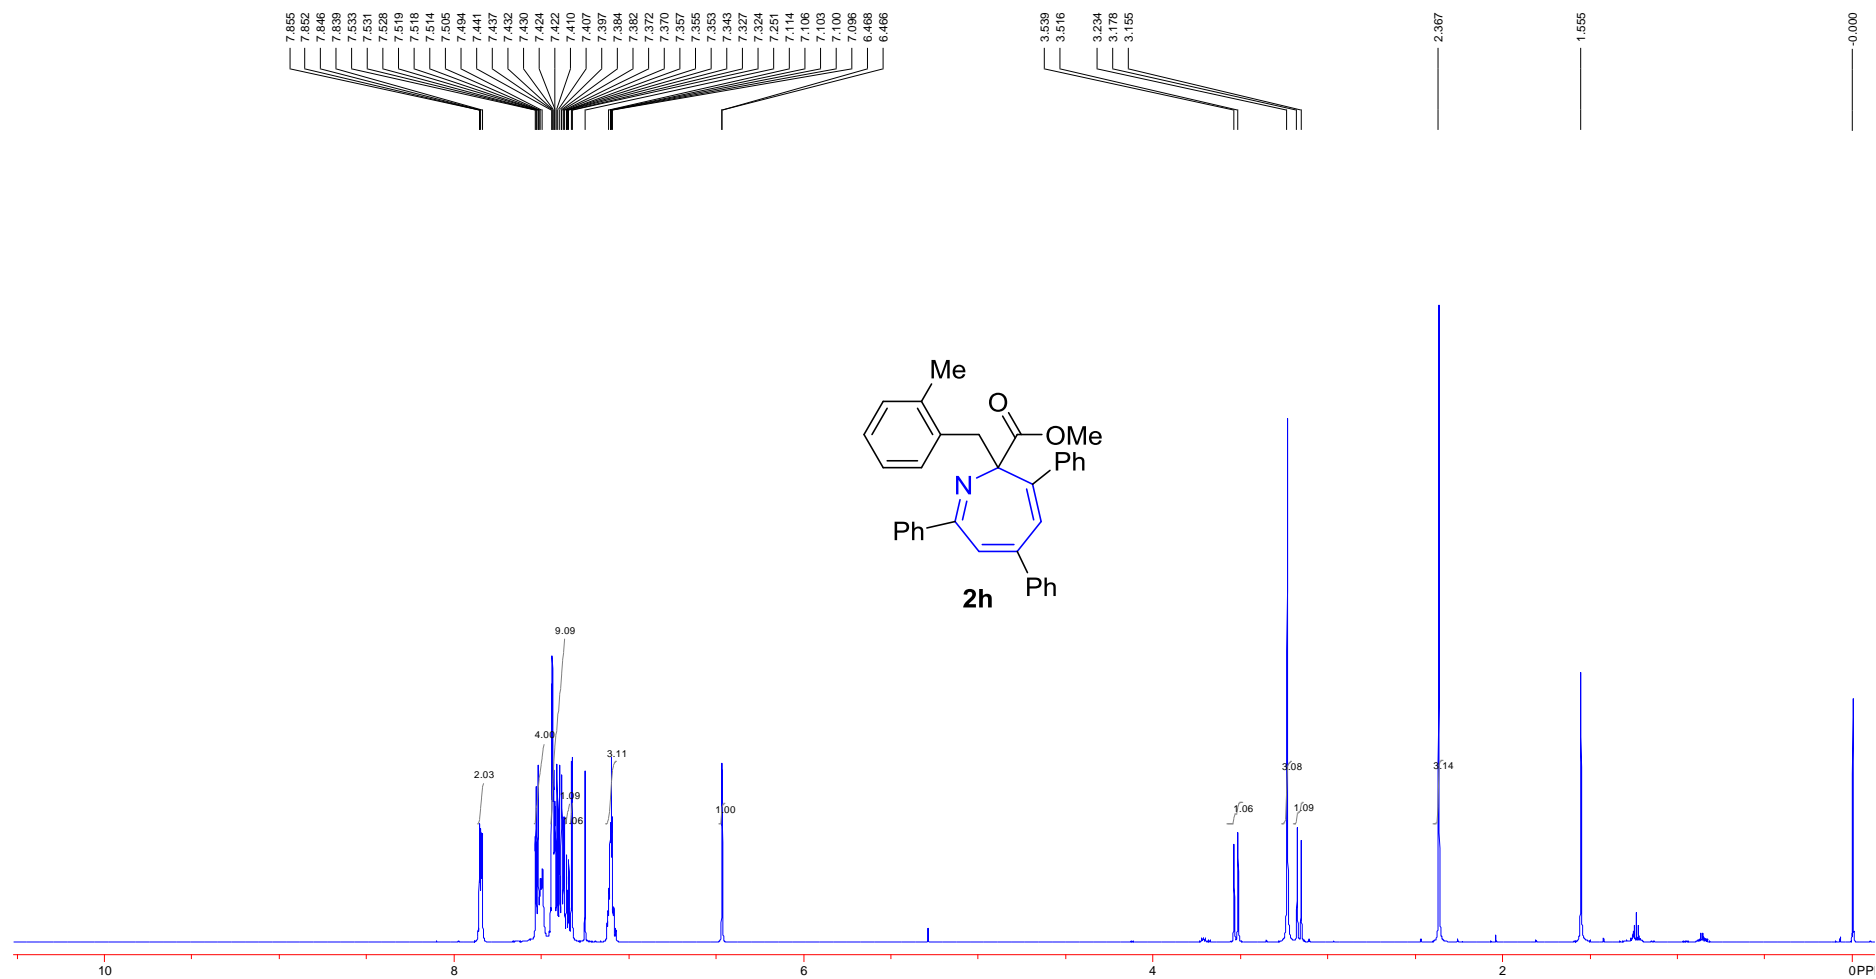

$^{13}\text{C}$  NMR (150 MHz,  $\text{CDCl}_3$ )

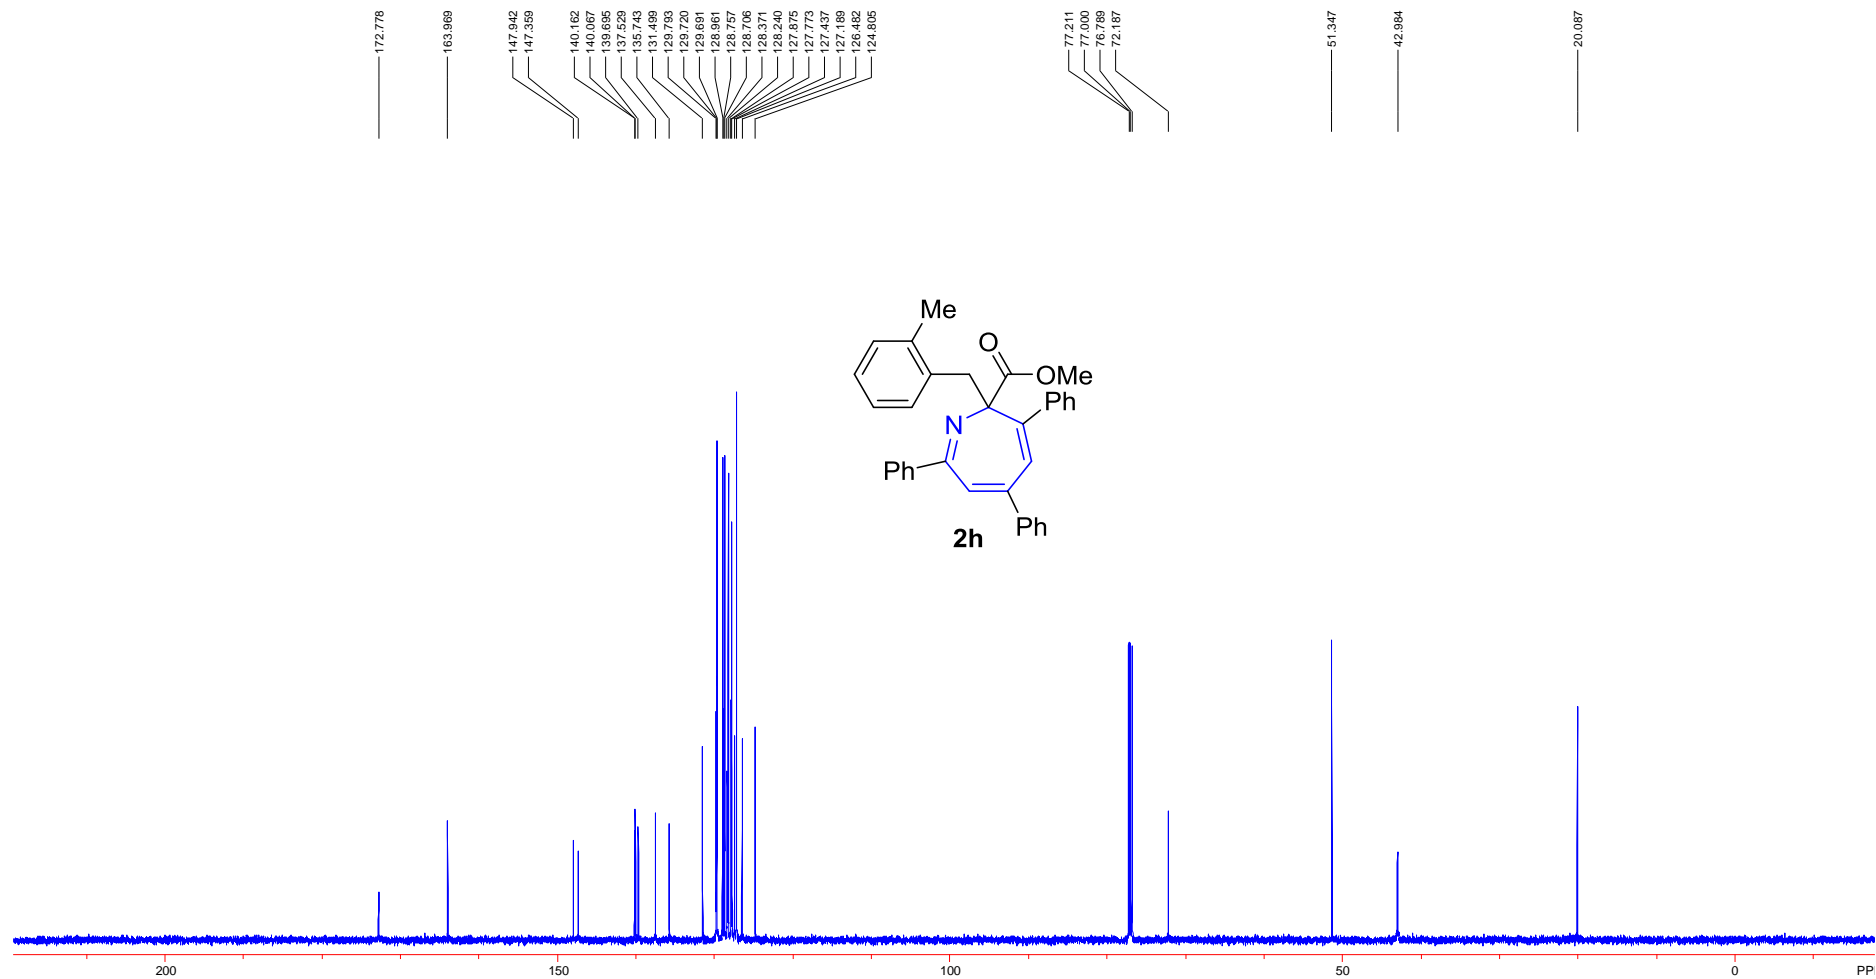

$^1\text{H}$  NMR(400 MHz,  $\text{CDCl}_3$ )

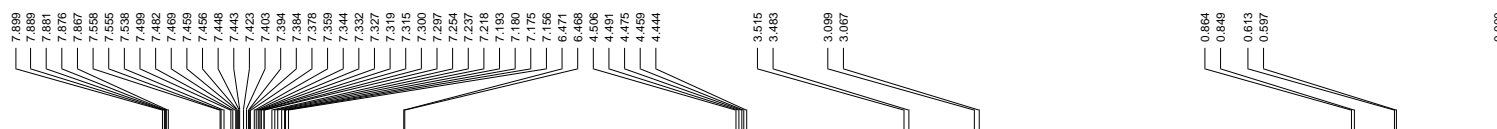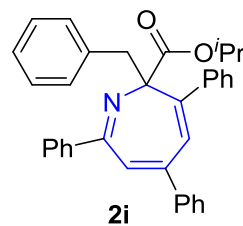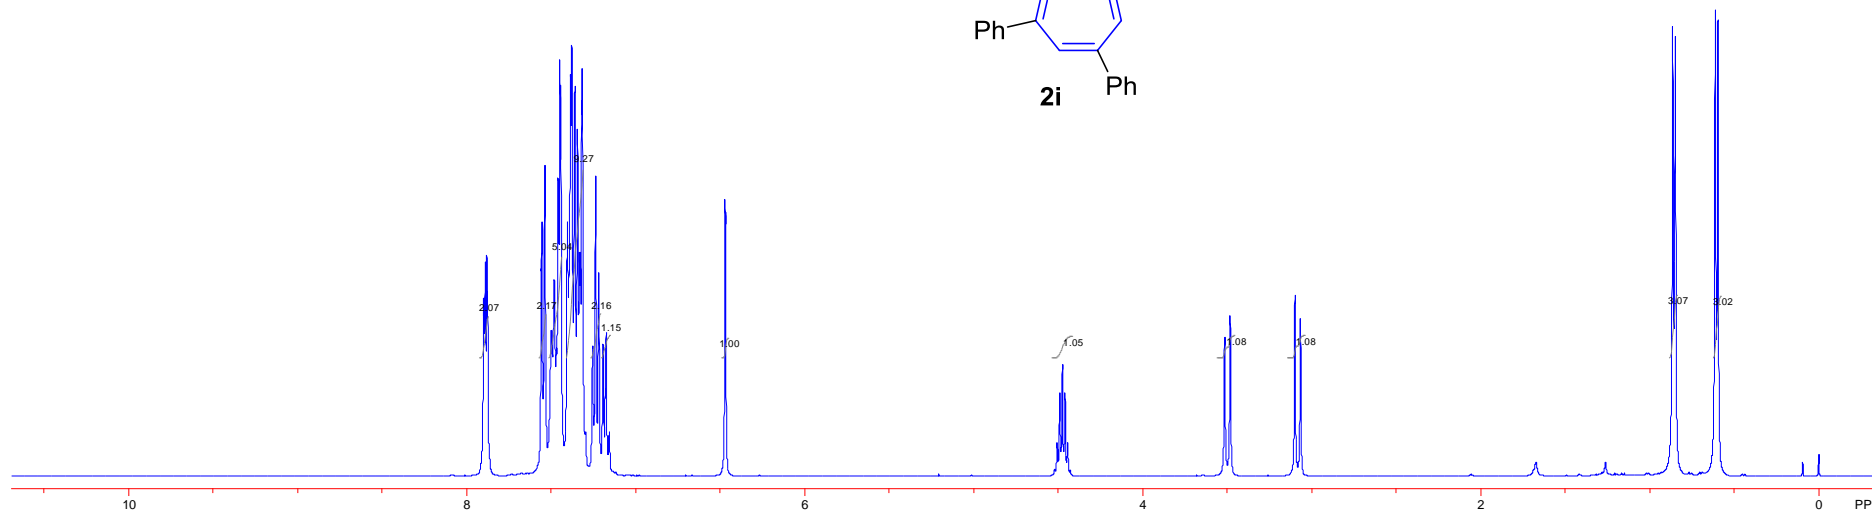

$^{13}\text{C}$  NMR (100 MHz,  $\text{CDCl}_3$ )

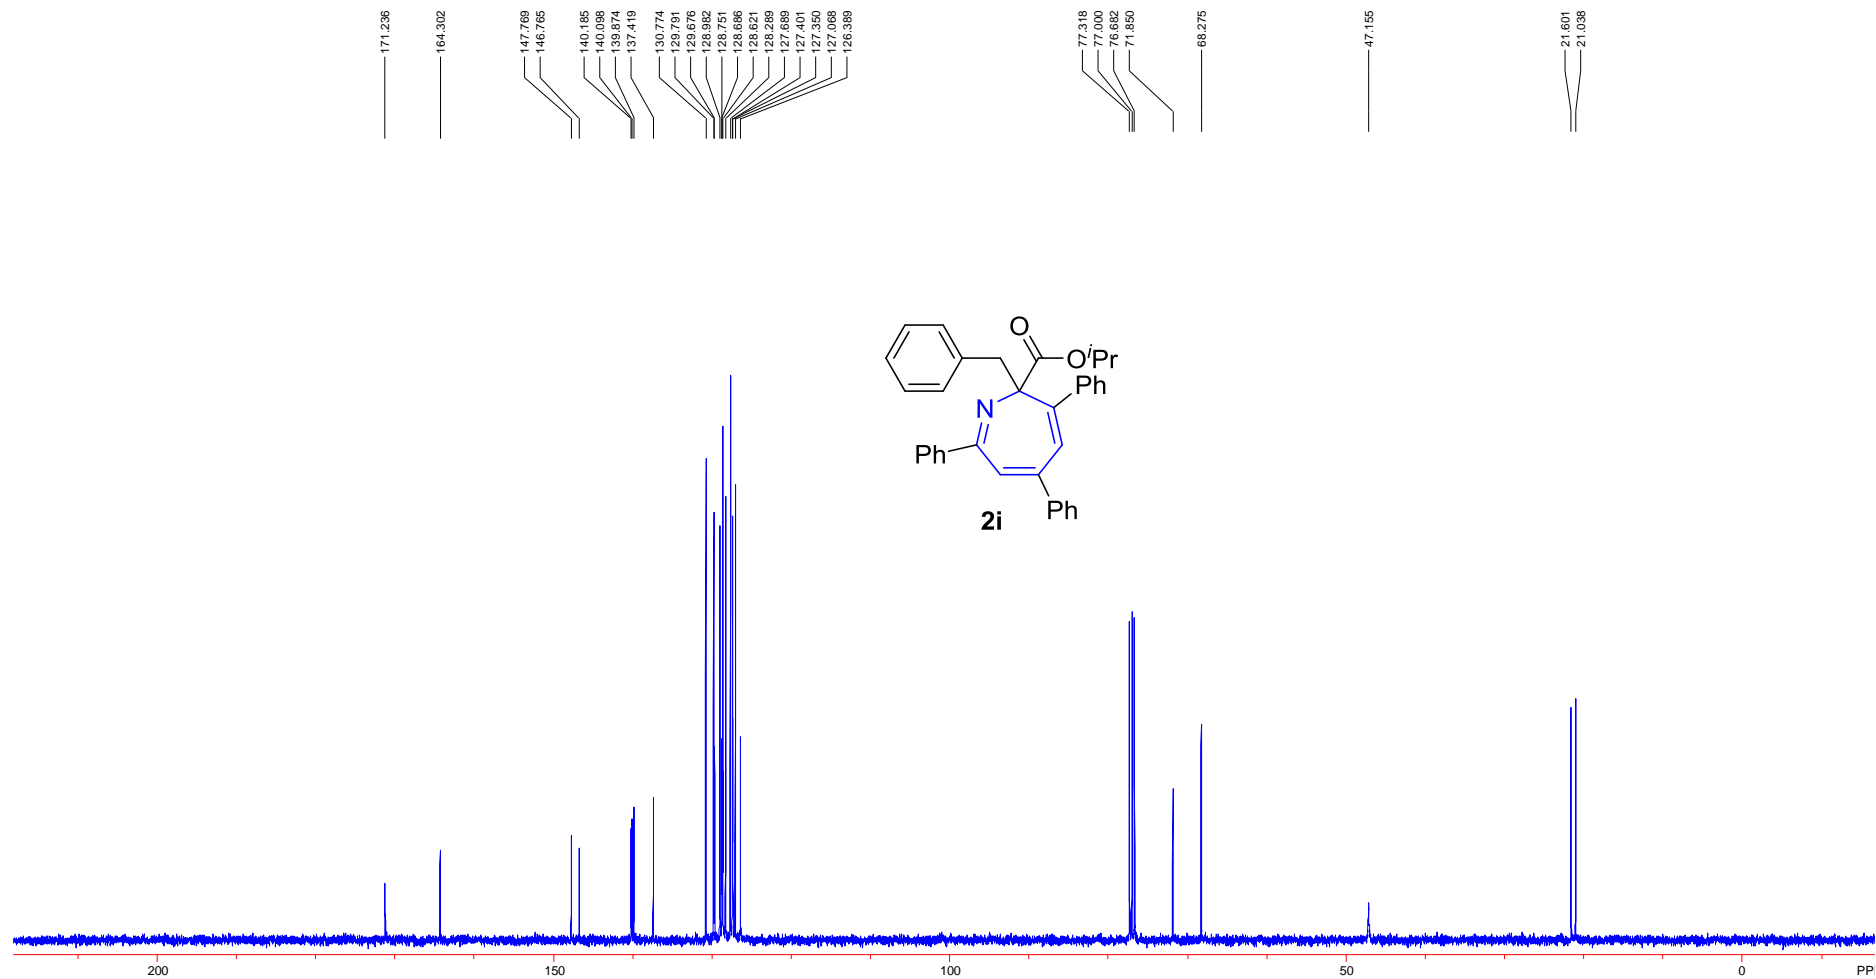



$^1\text{H}$  NMR(400 MHz,  $\text{CDCl}_3$ )

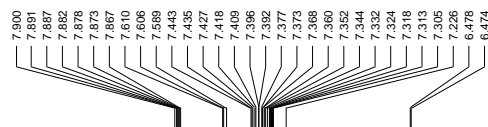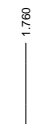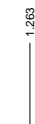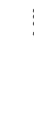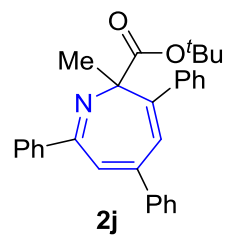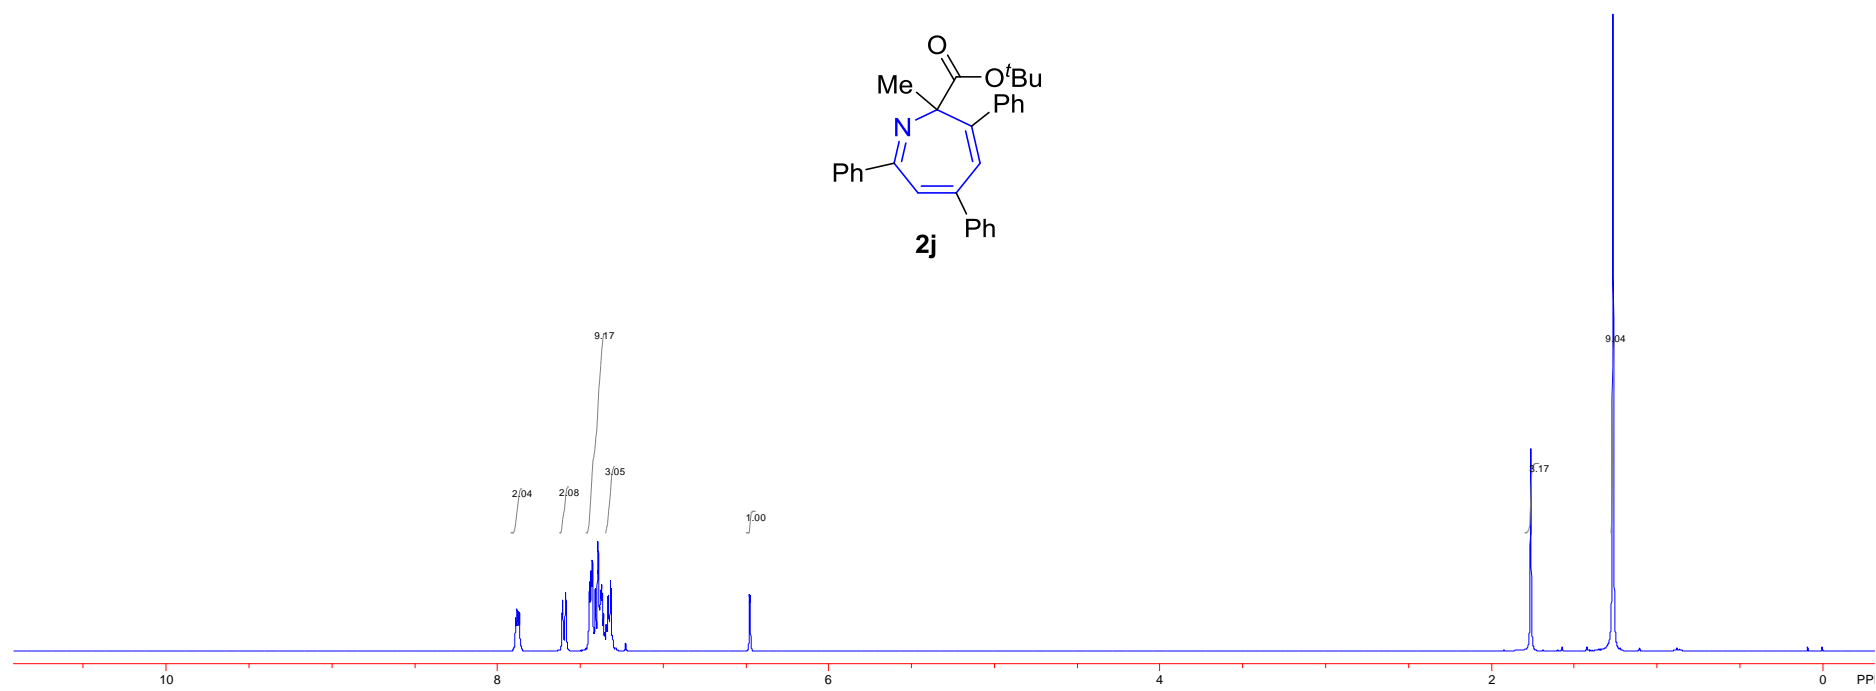

$^{13}\text{C}$  NMR (100 MHz,  $\text{CDCl}_3$ )

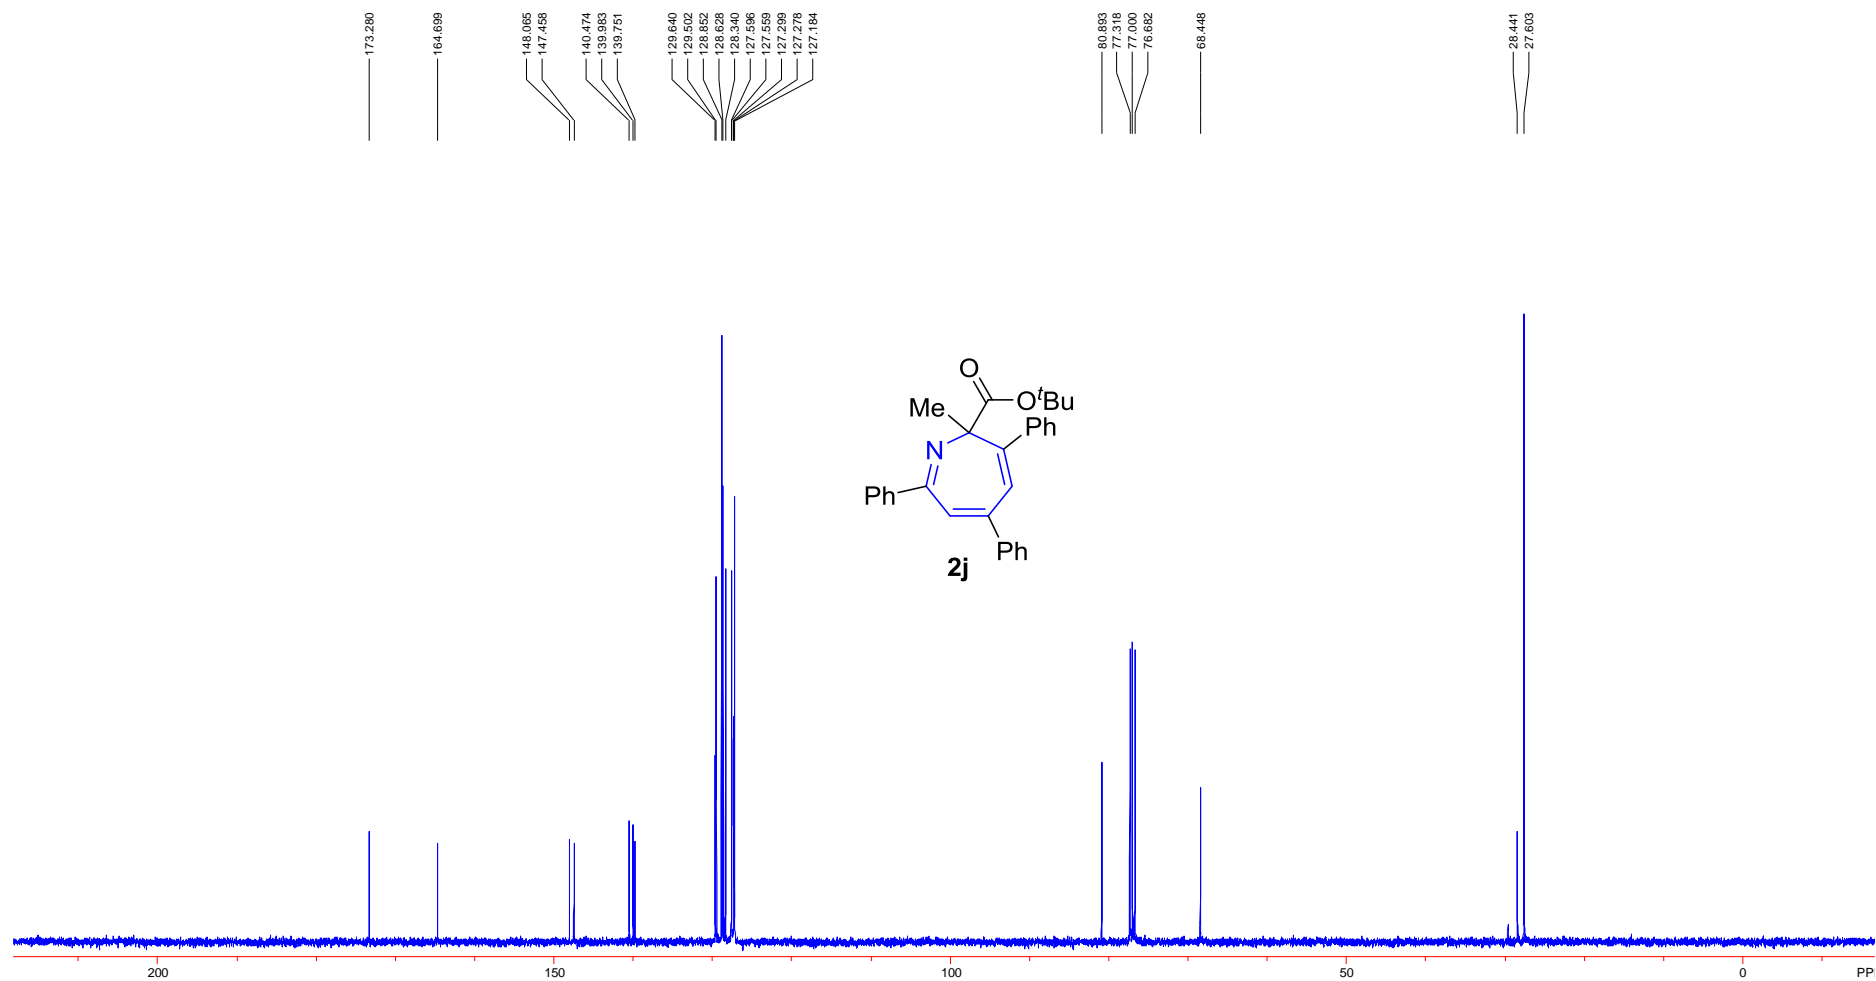

$^1\text{H}$  NMR(400 MHz,  $\text{CDCl}_3$ )

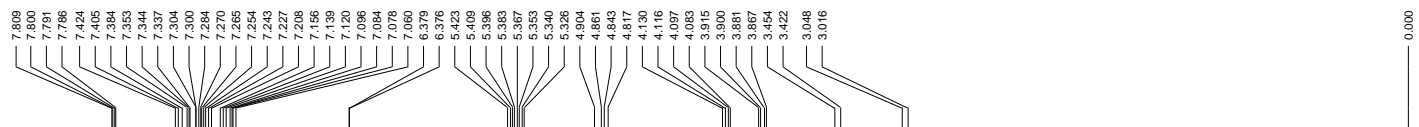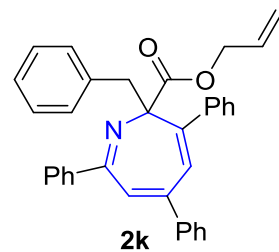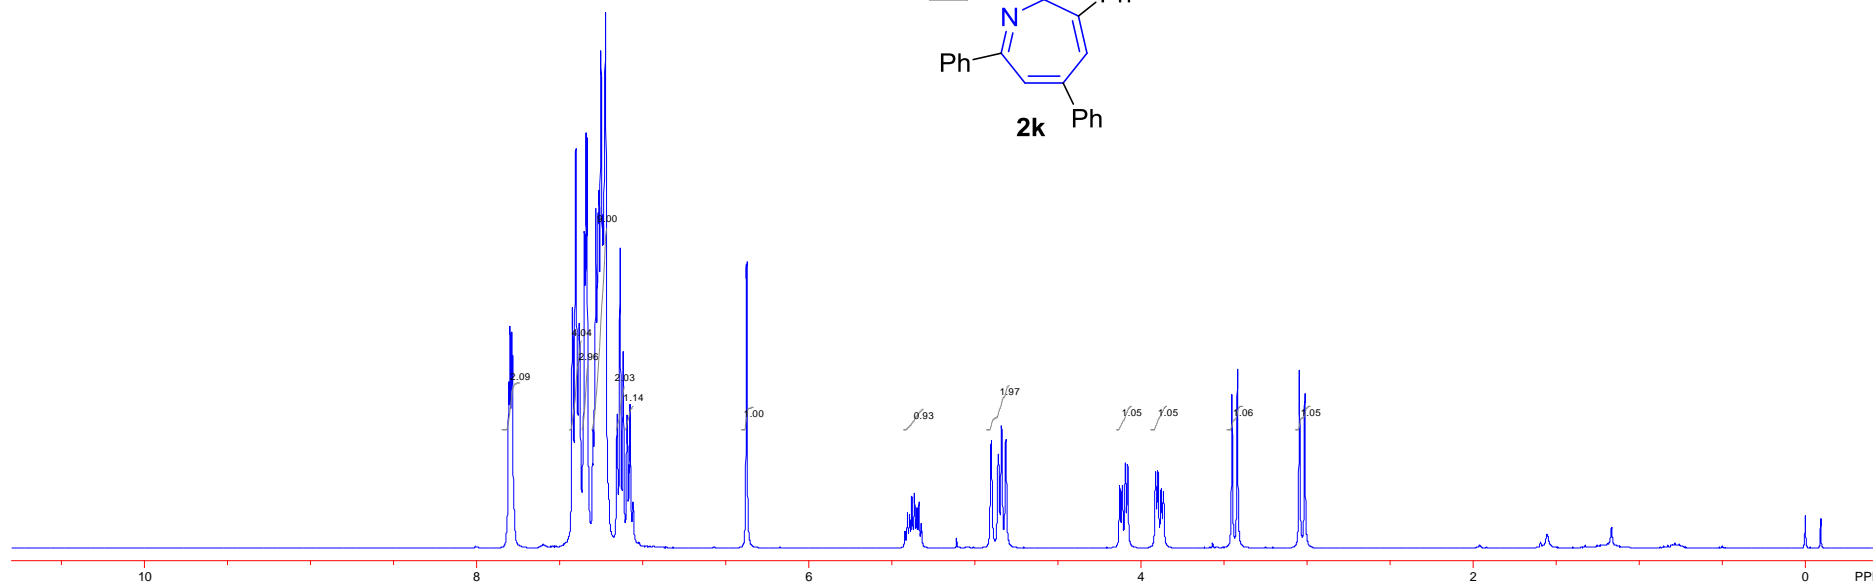

$^{13}\text{C}$  NMR (100 MHz,  $\text{CDCl}_3$ )

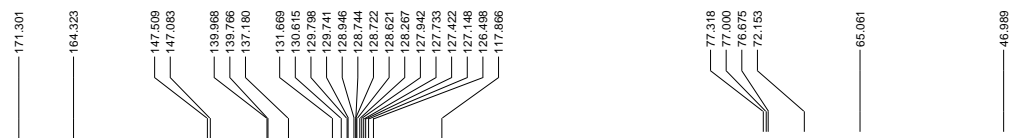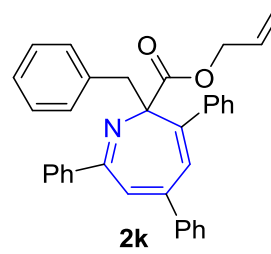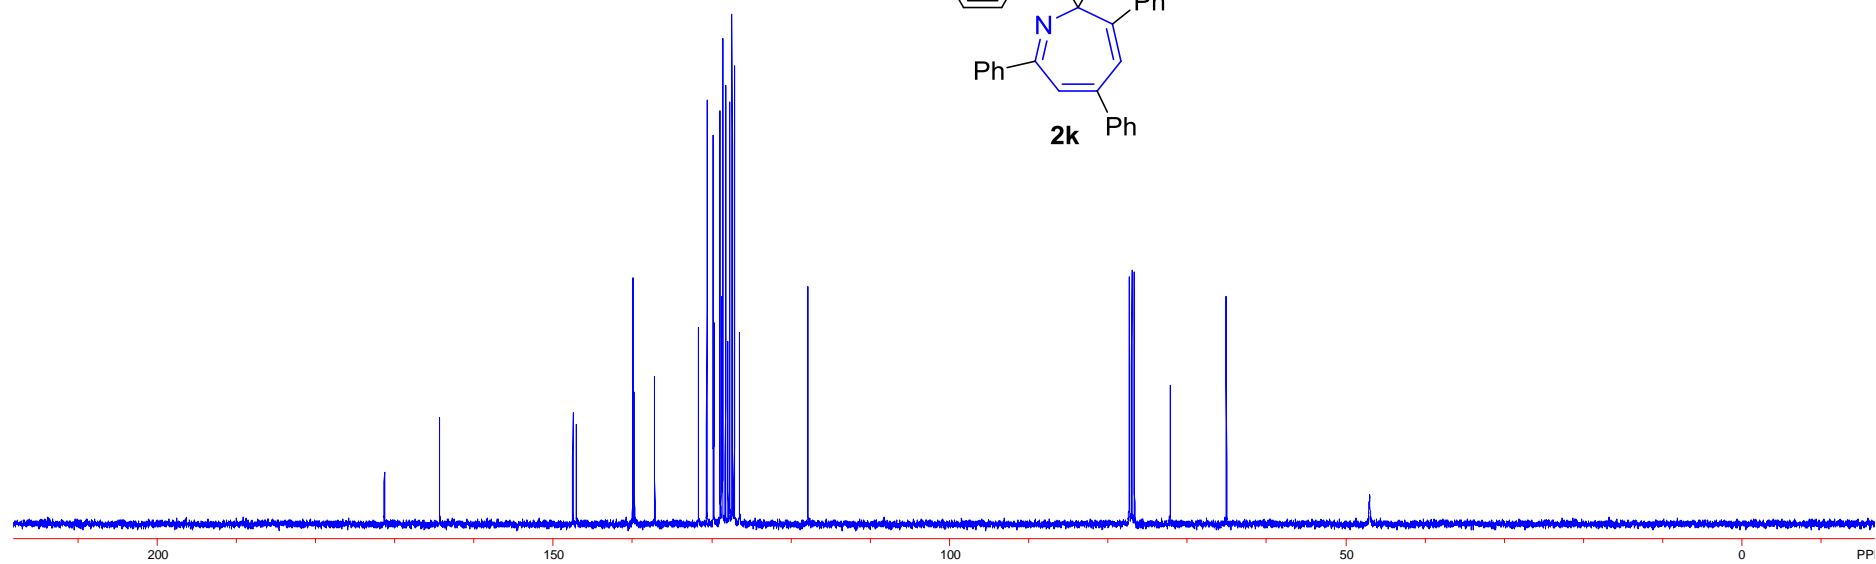

$^1\text{H NMR}$ (600 MHz,  $\text{CDCl}_3$ )

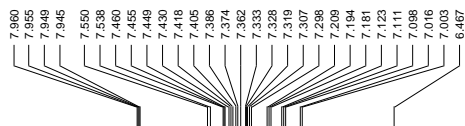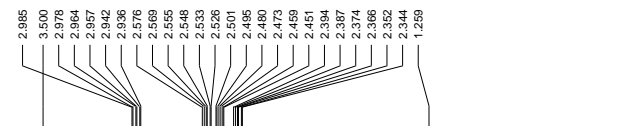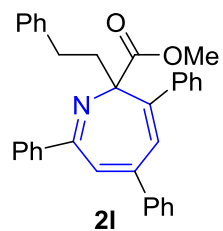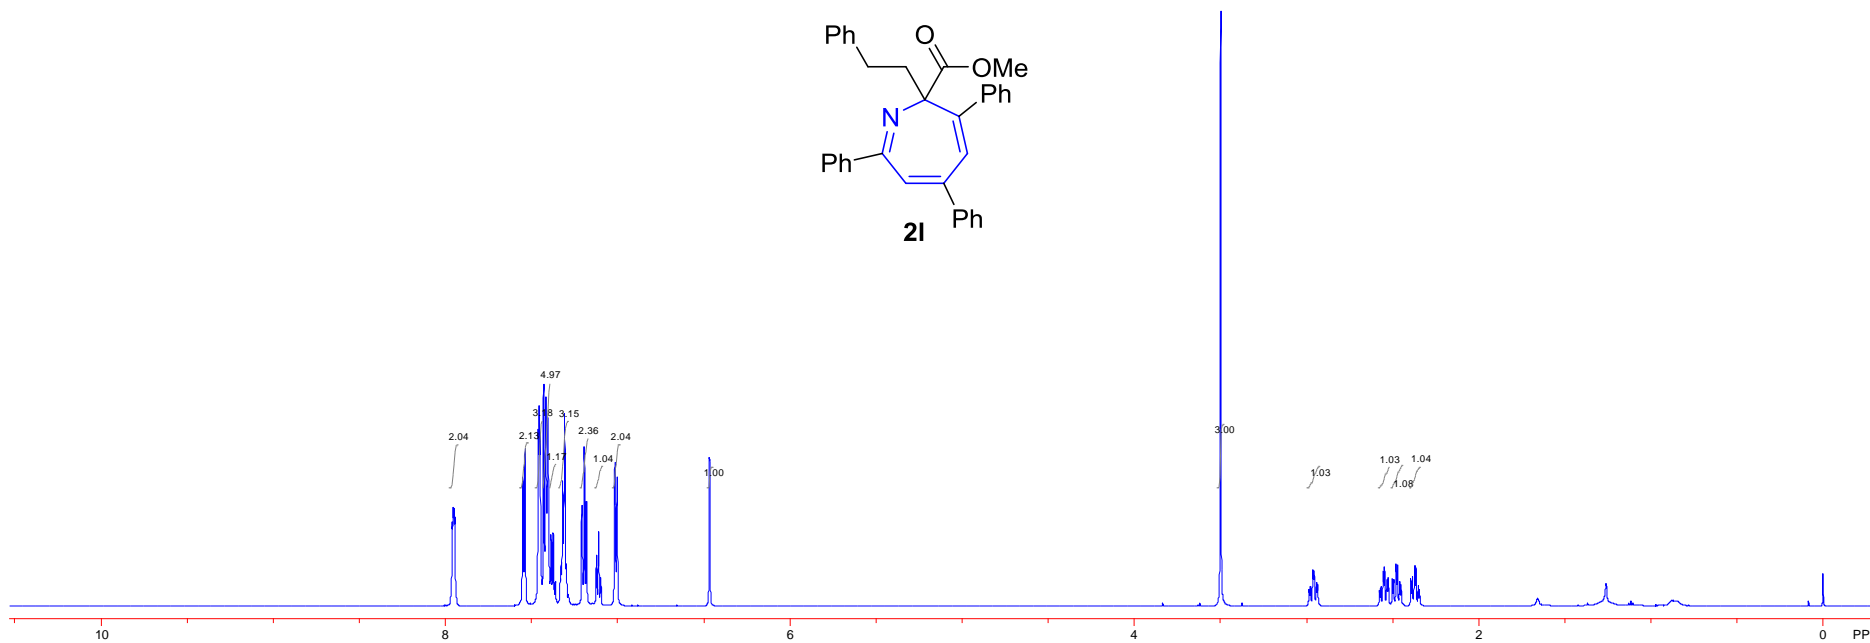

$^{13}\text{C}$  NMR (150 MHz,  $\text{CDCl}_3$ )

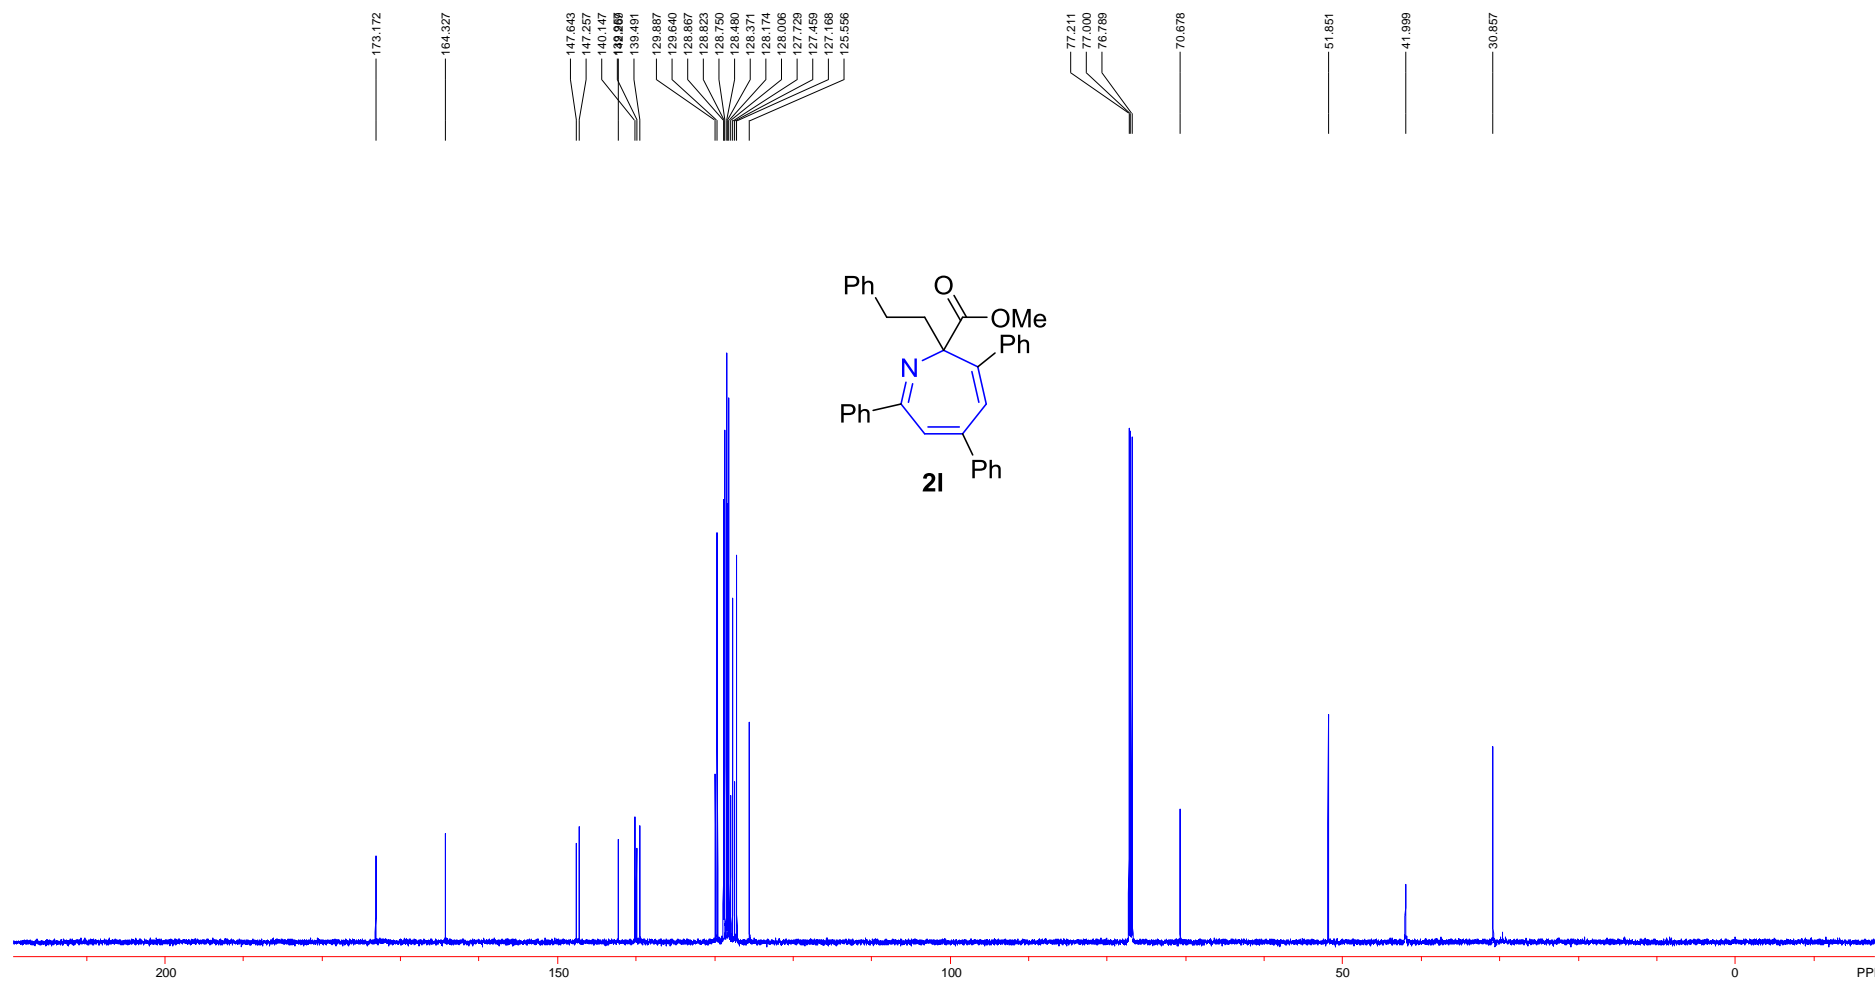

$^1\text{H}$  NMR(600 MHz,  $\text{CDCl}_3$ )

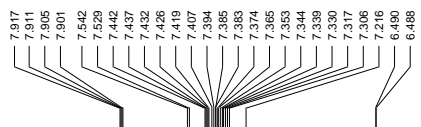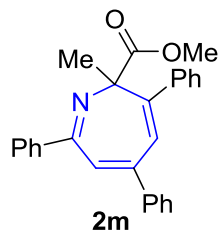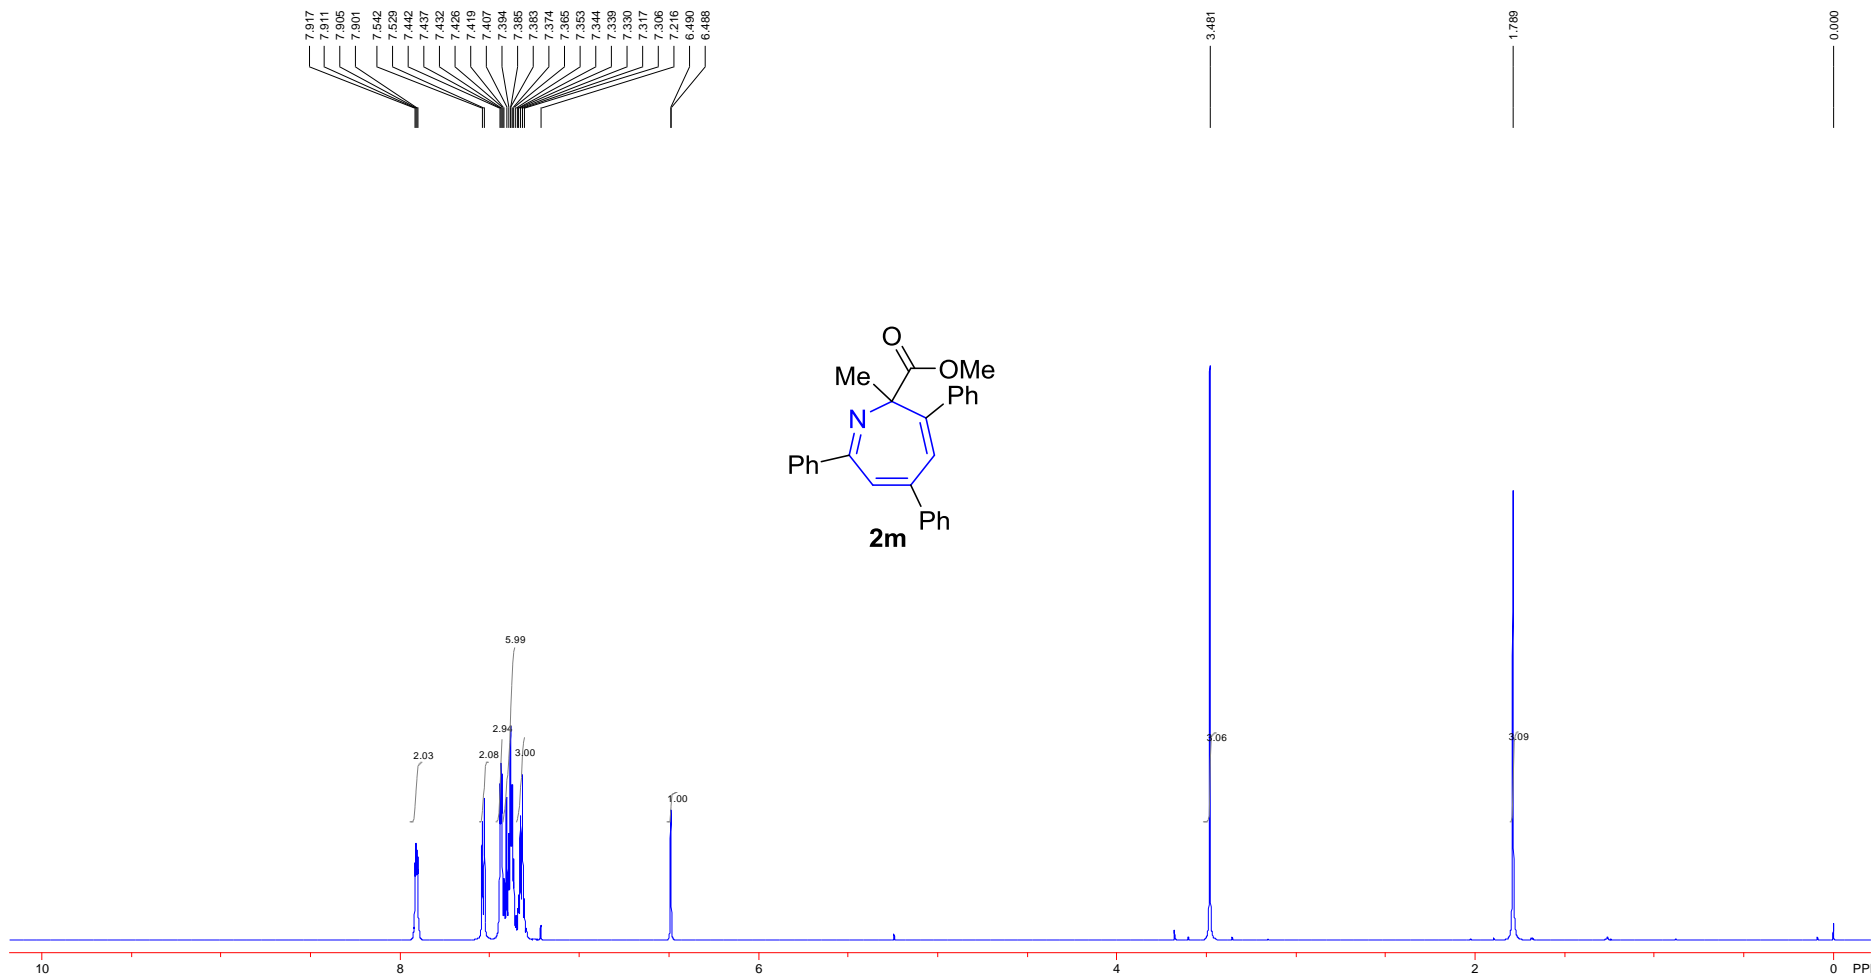

$^{13}\text{C}$  NMR (150 MHz,  $\text{CDCl}_3$ )

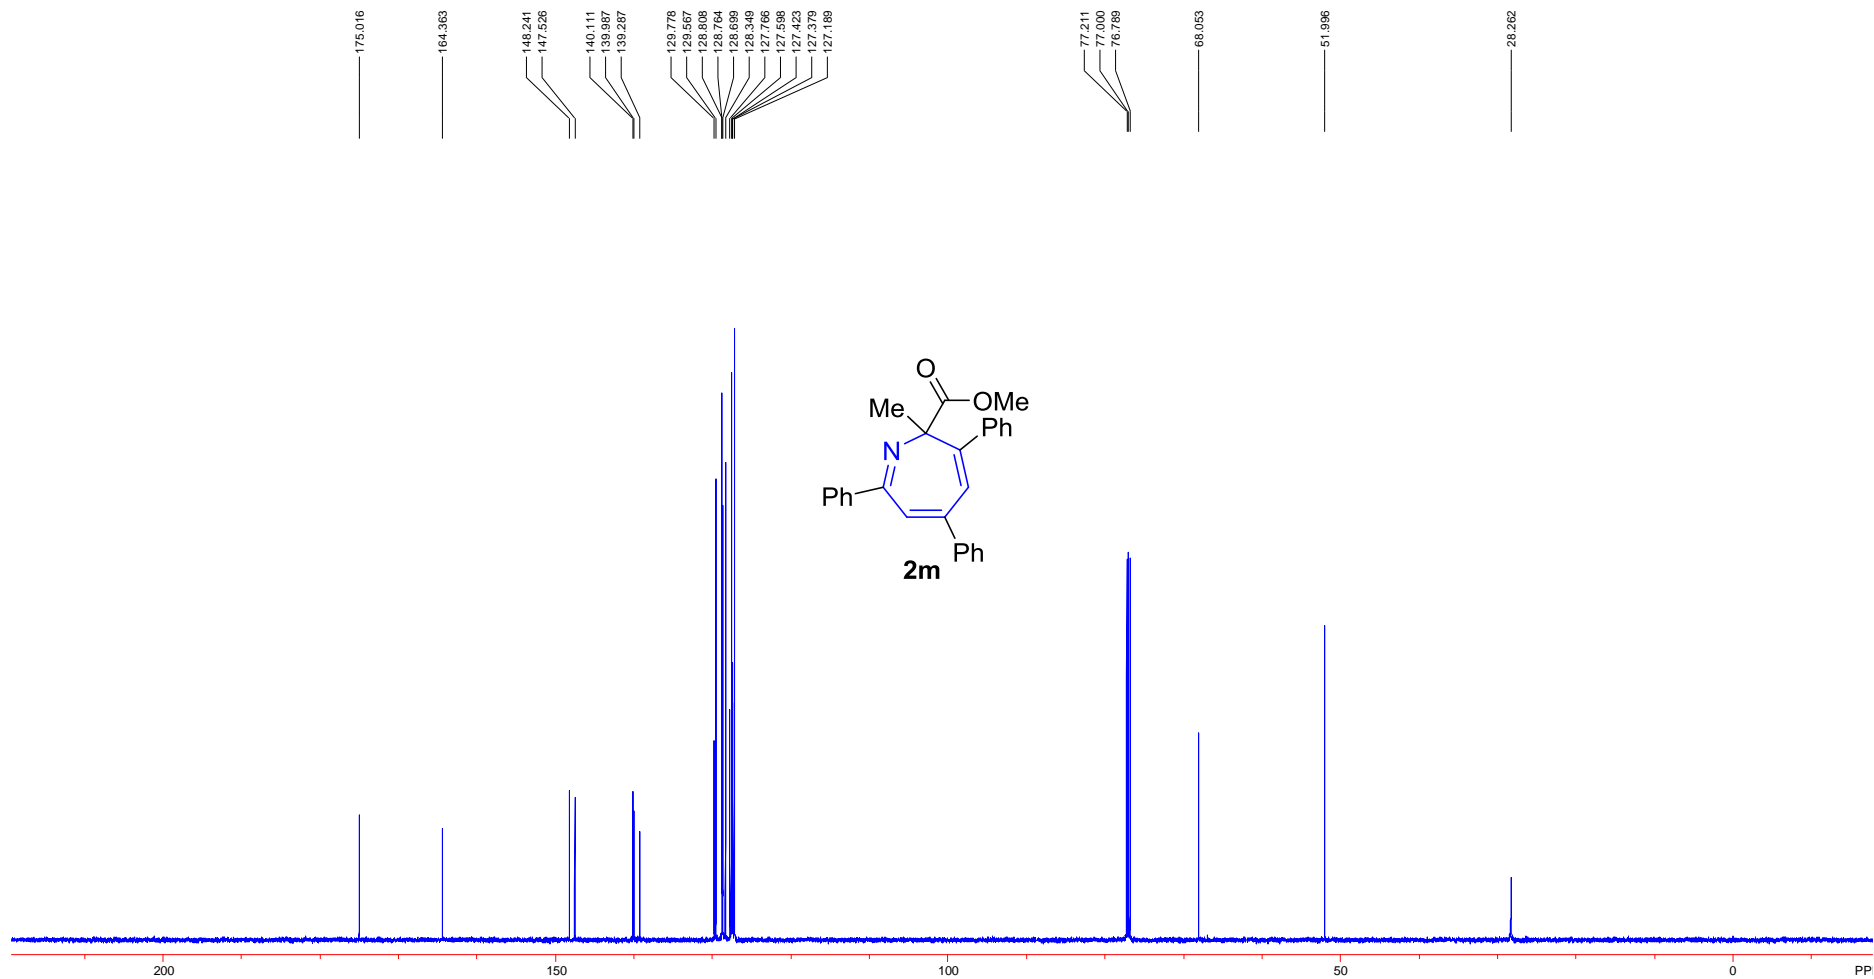



$^1\text{H NMR}$ (400 MHz,  $\text{CDCl}_3$ )

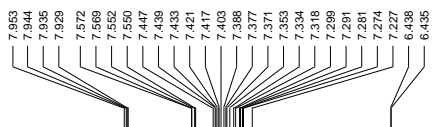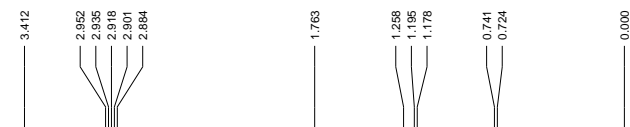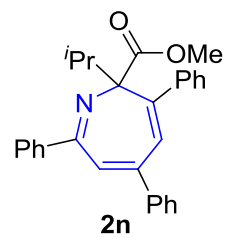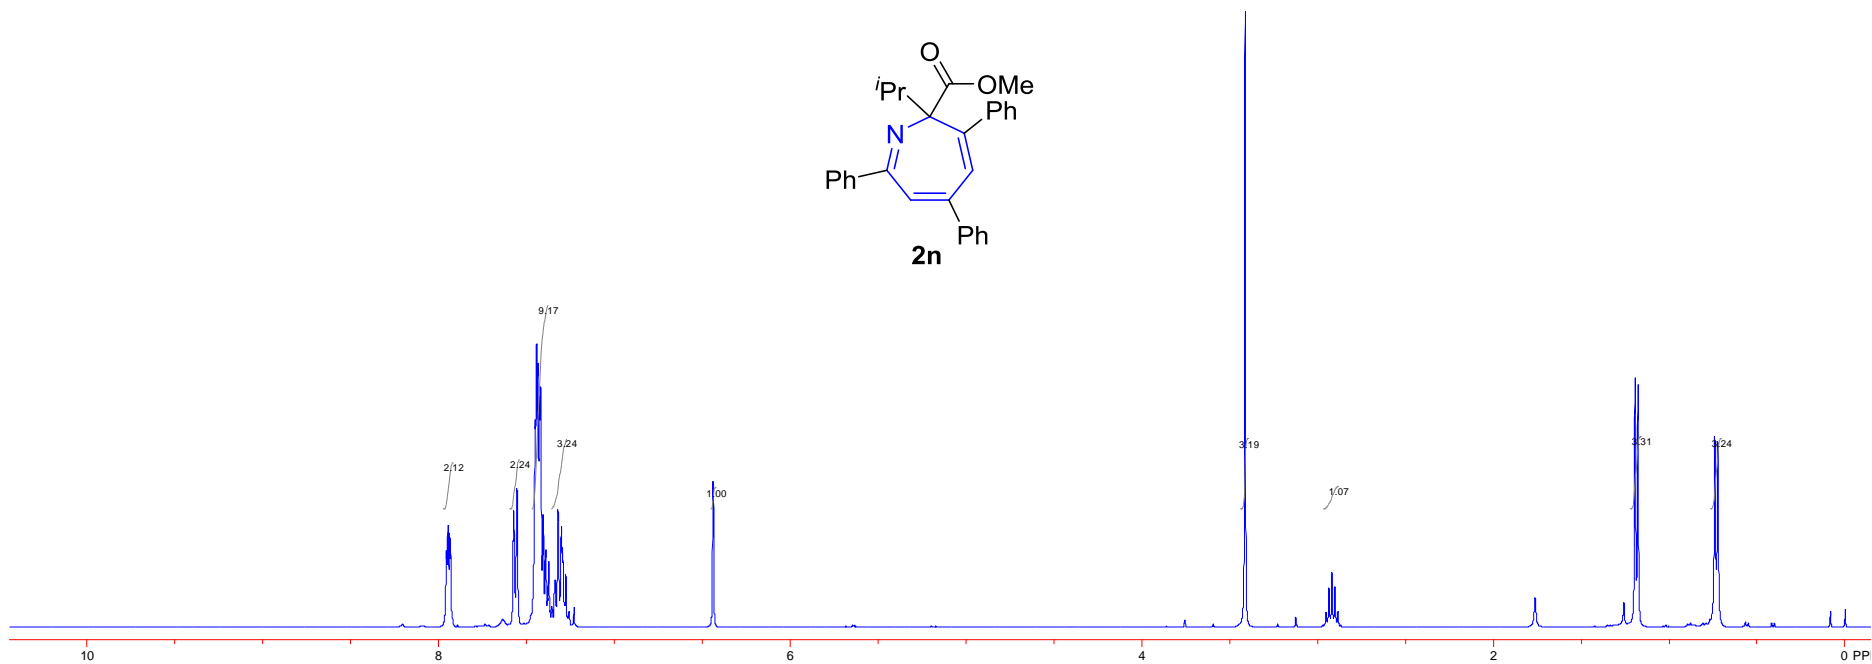

$^{13}\text{C}$  NMR (100 MHz,  $\text{CDCl}_3$ )

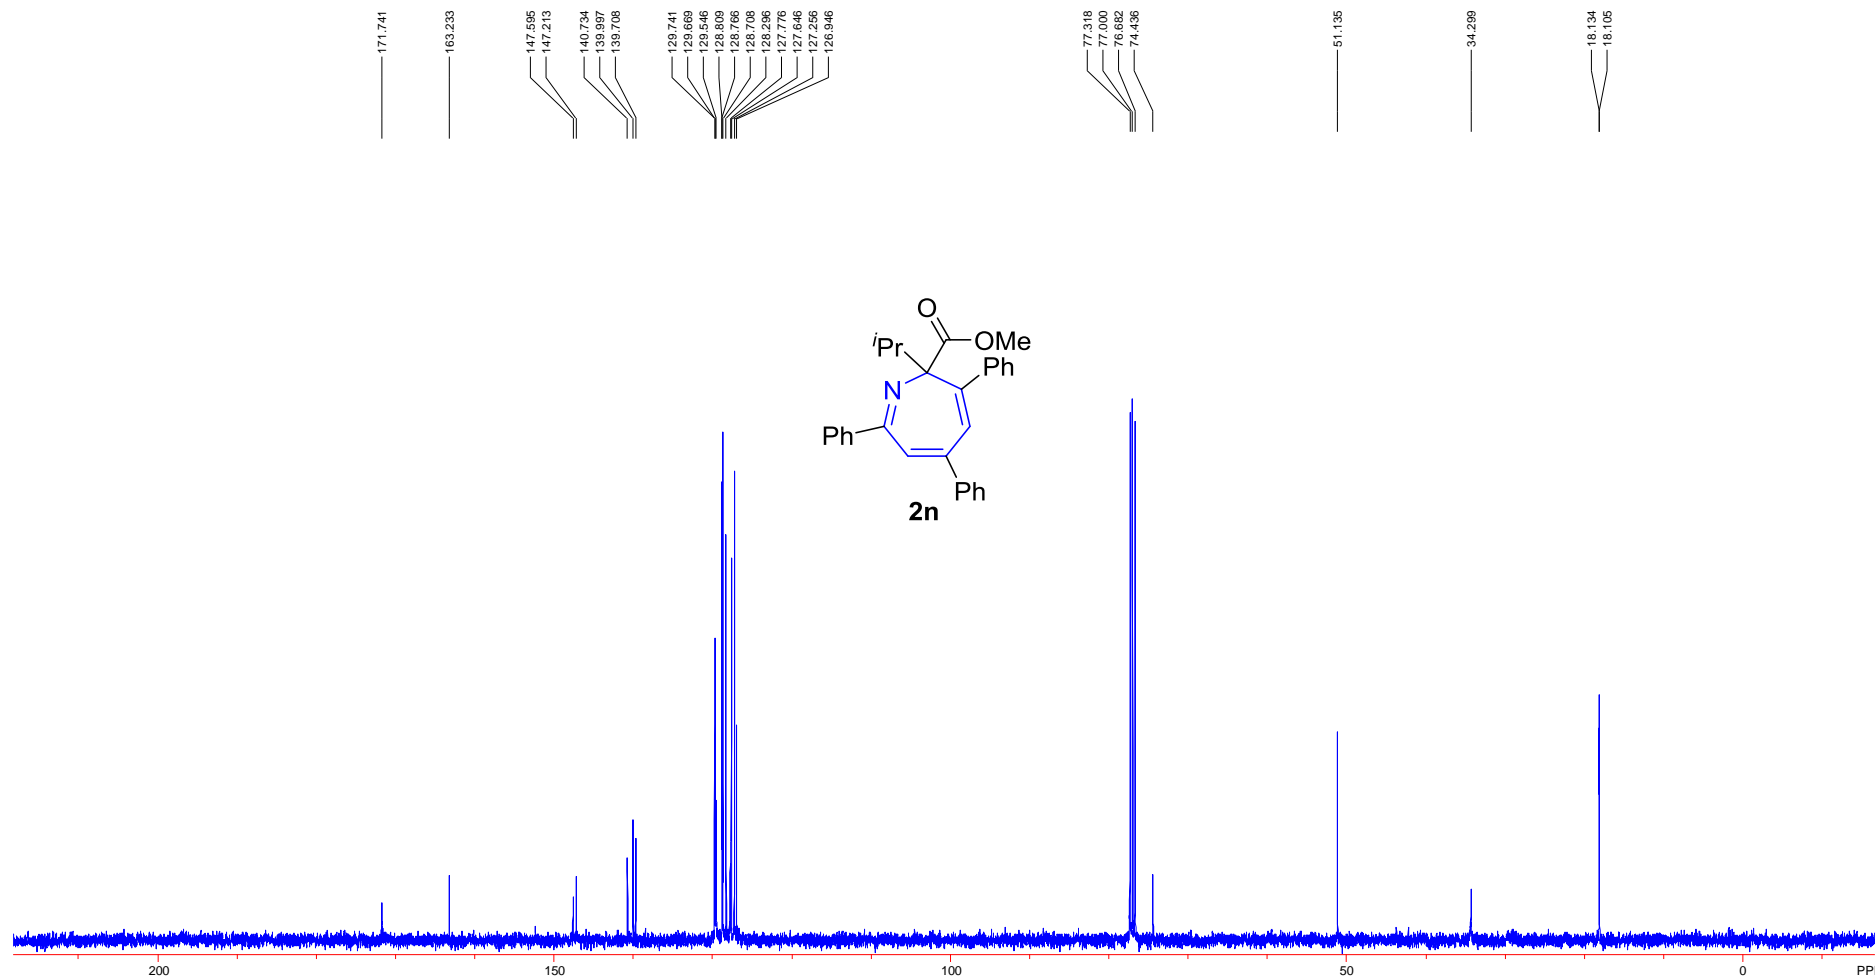

$^1\text{H}$  NMR(400 MHz,  $\text{CDCl}_3$ )

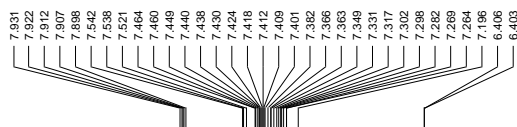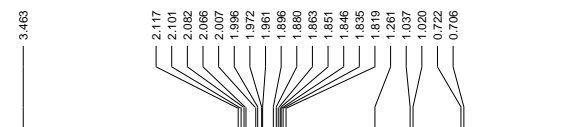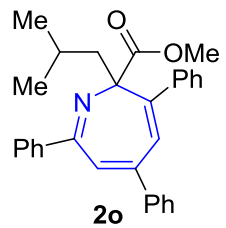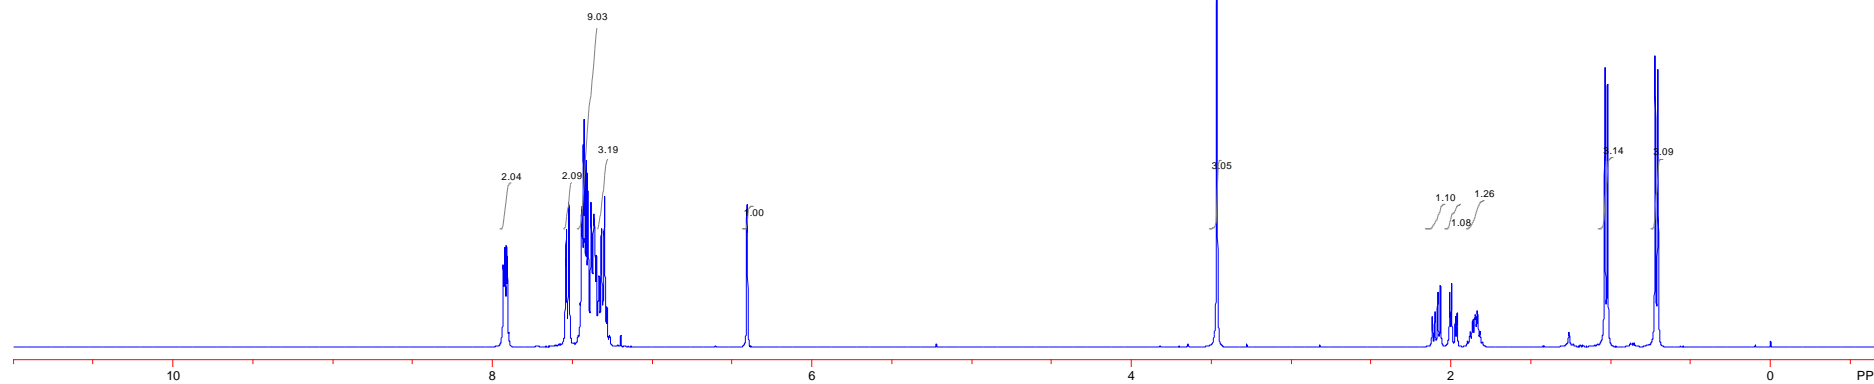

$^{13}\text{C}$  NMR (100 MHz,  $\text{CDCl}_3$ )

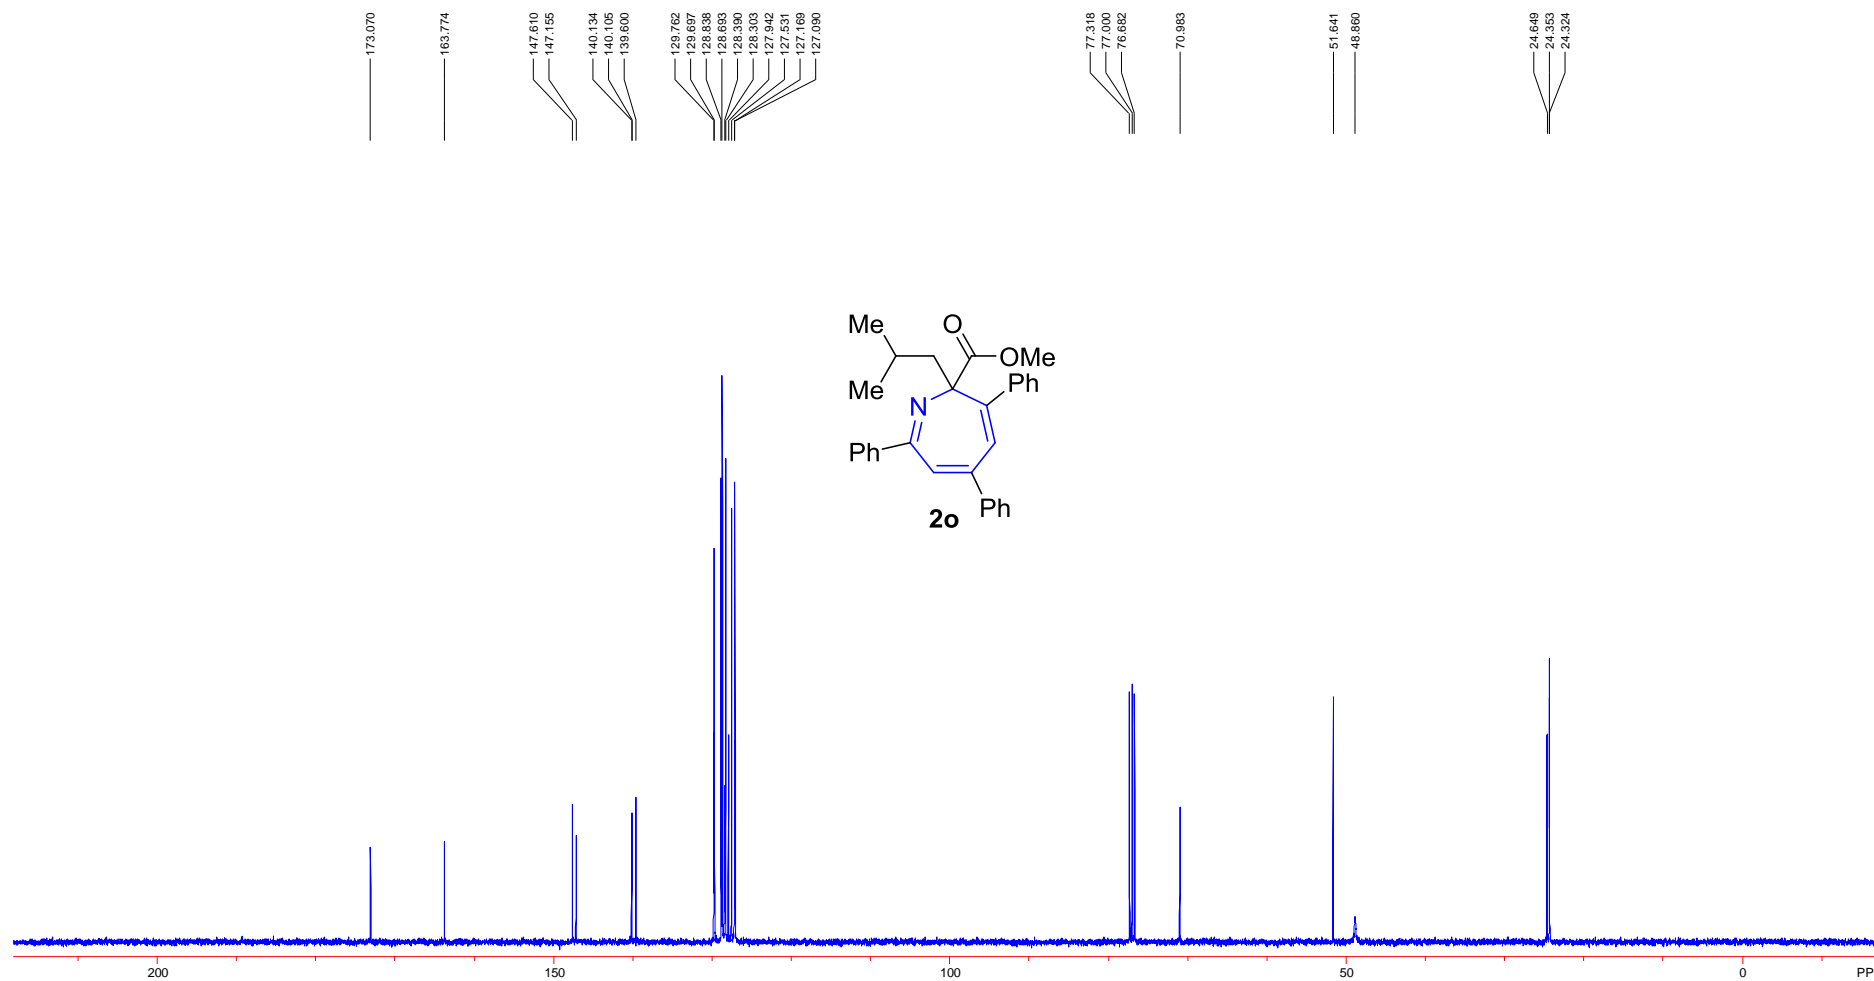

$^1\text{H}$  NMR(400 MHz,  $\text{CDCl}_3$ )

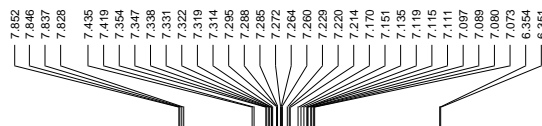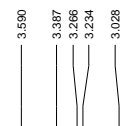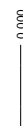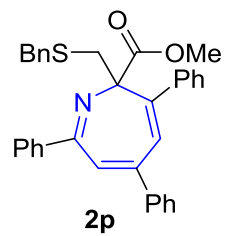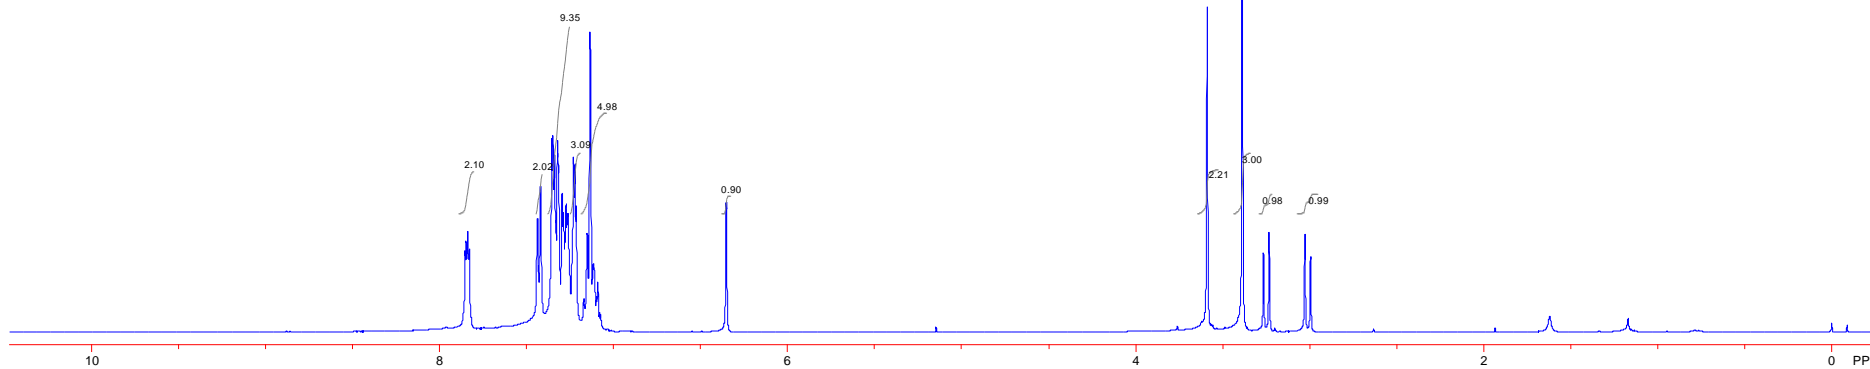

$^{13}\text{C}$  NMR (100 MHz,  $\text{CDCl}_3$ )

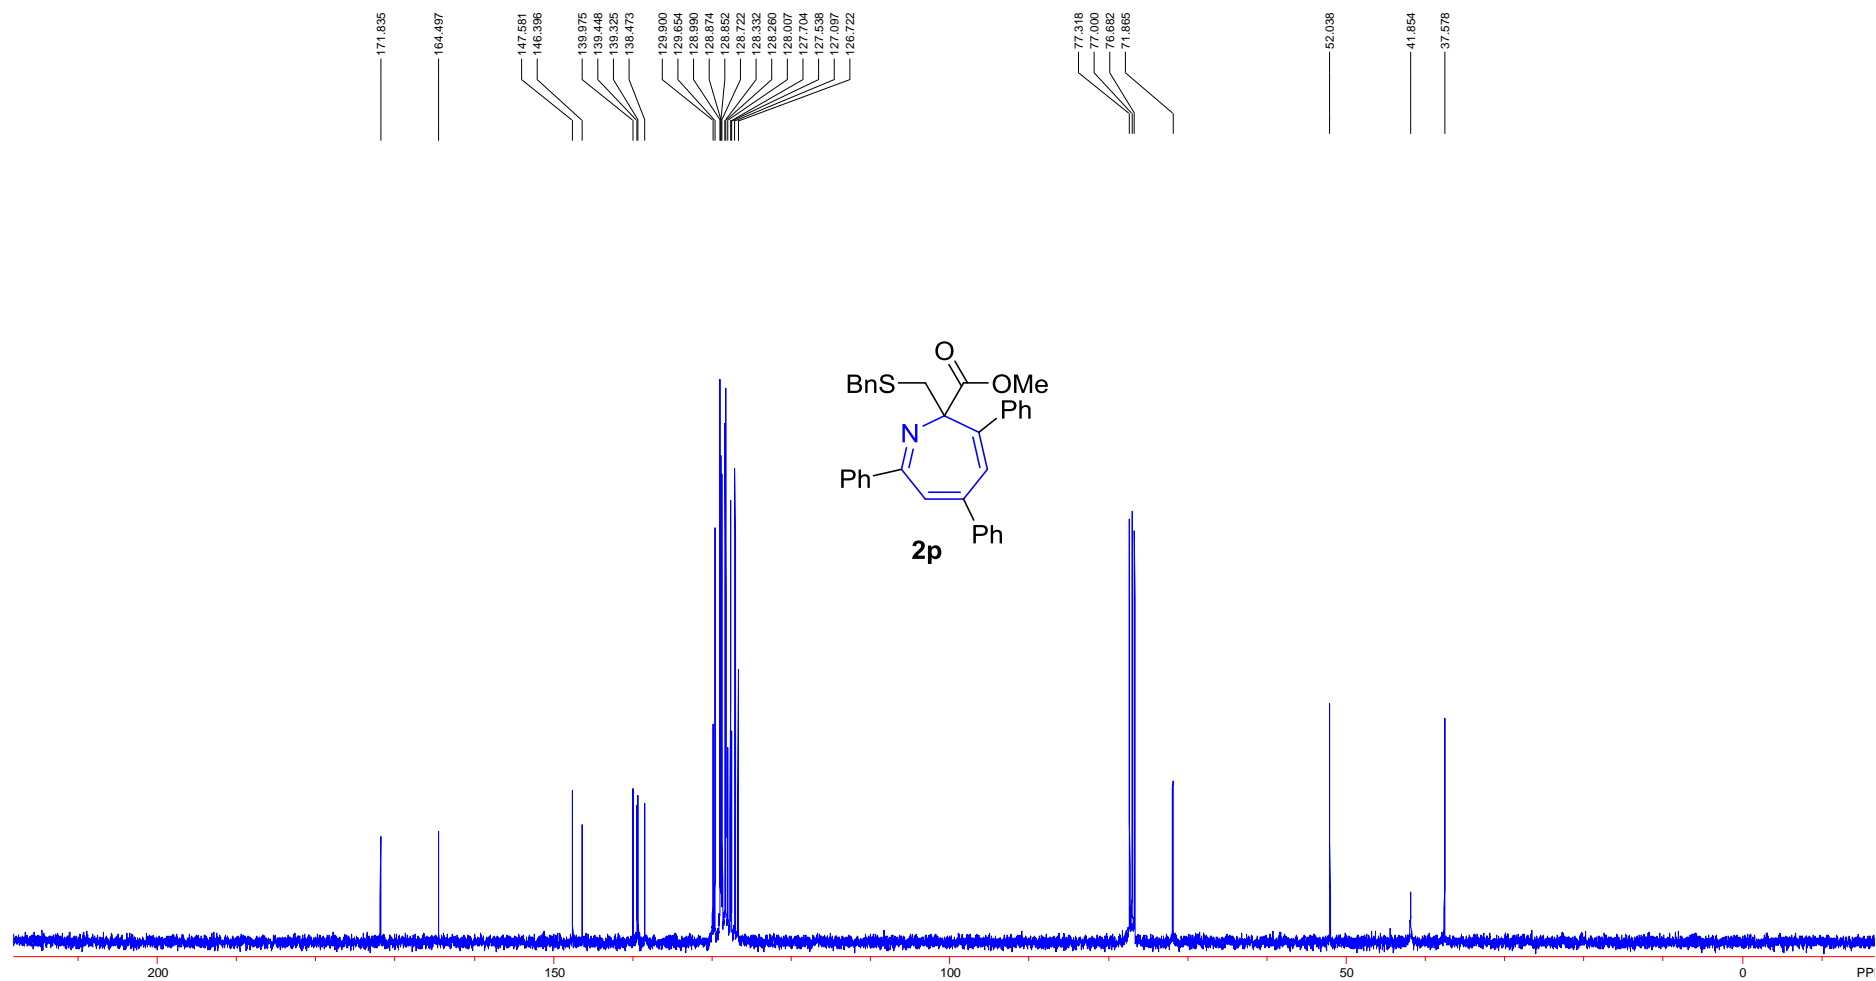

$^1\text{H}$  NMR(600 MHz,  $\text{CDCl}_3$ )

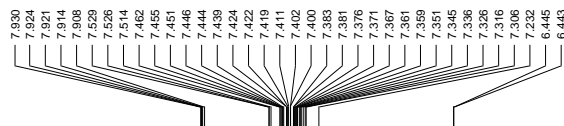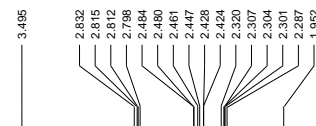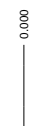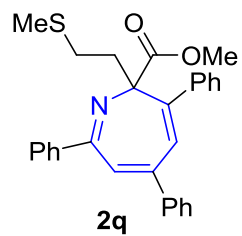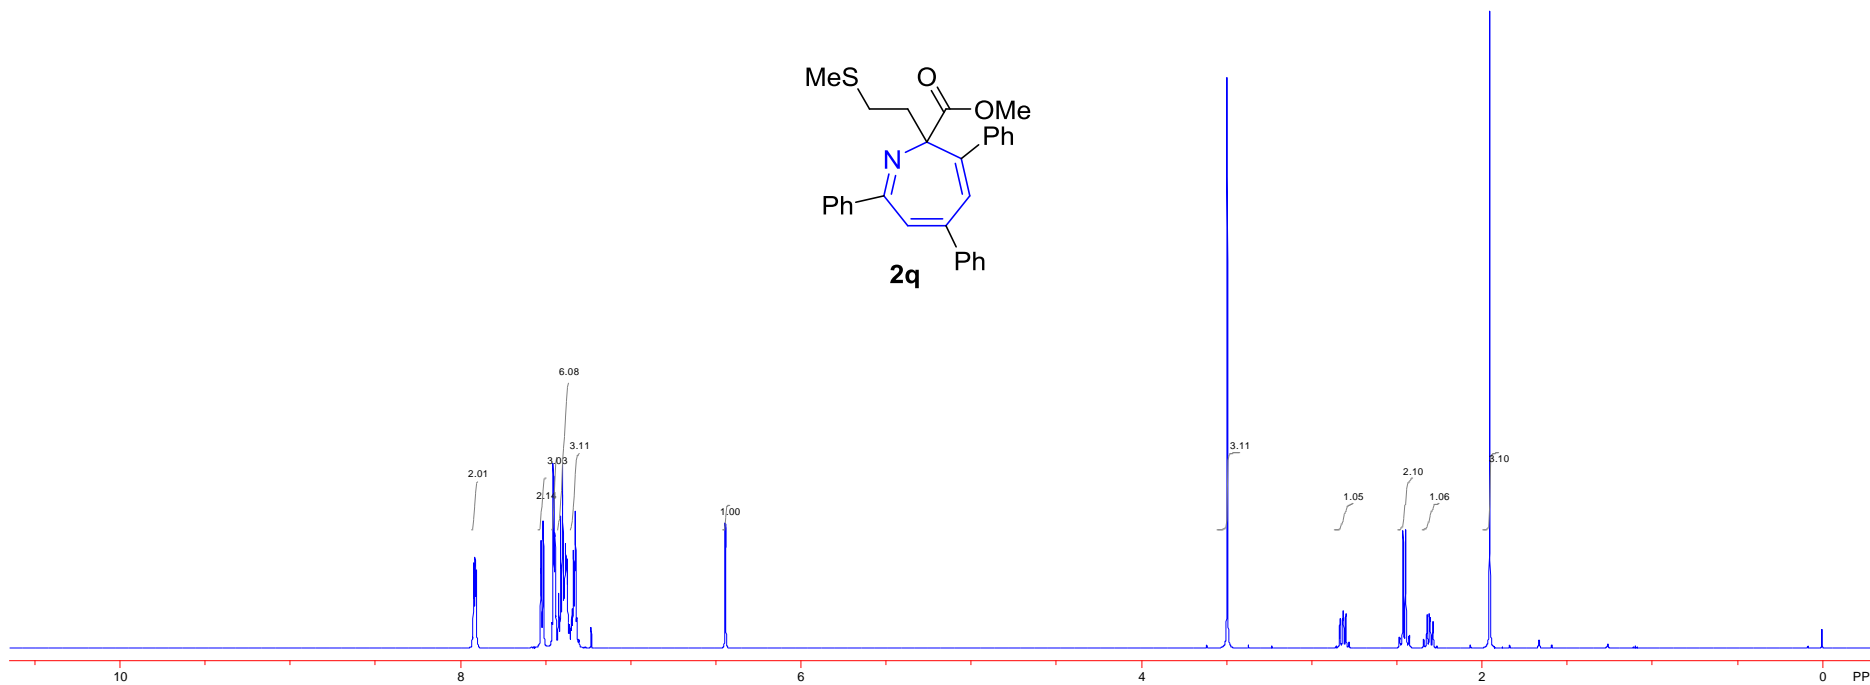

$^{13}\text{C}$  NMR (150 MHz,  $\text{CDCl}_3$ )

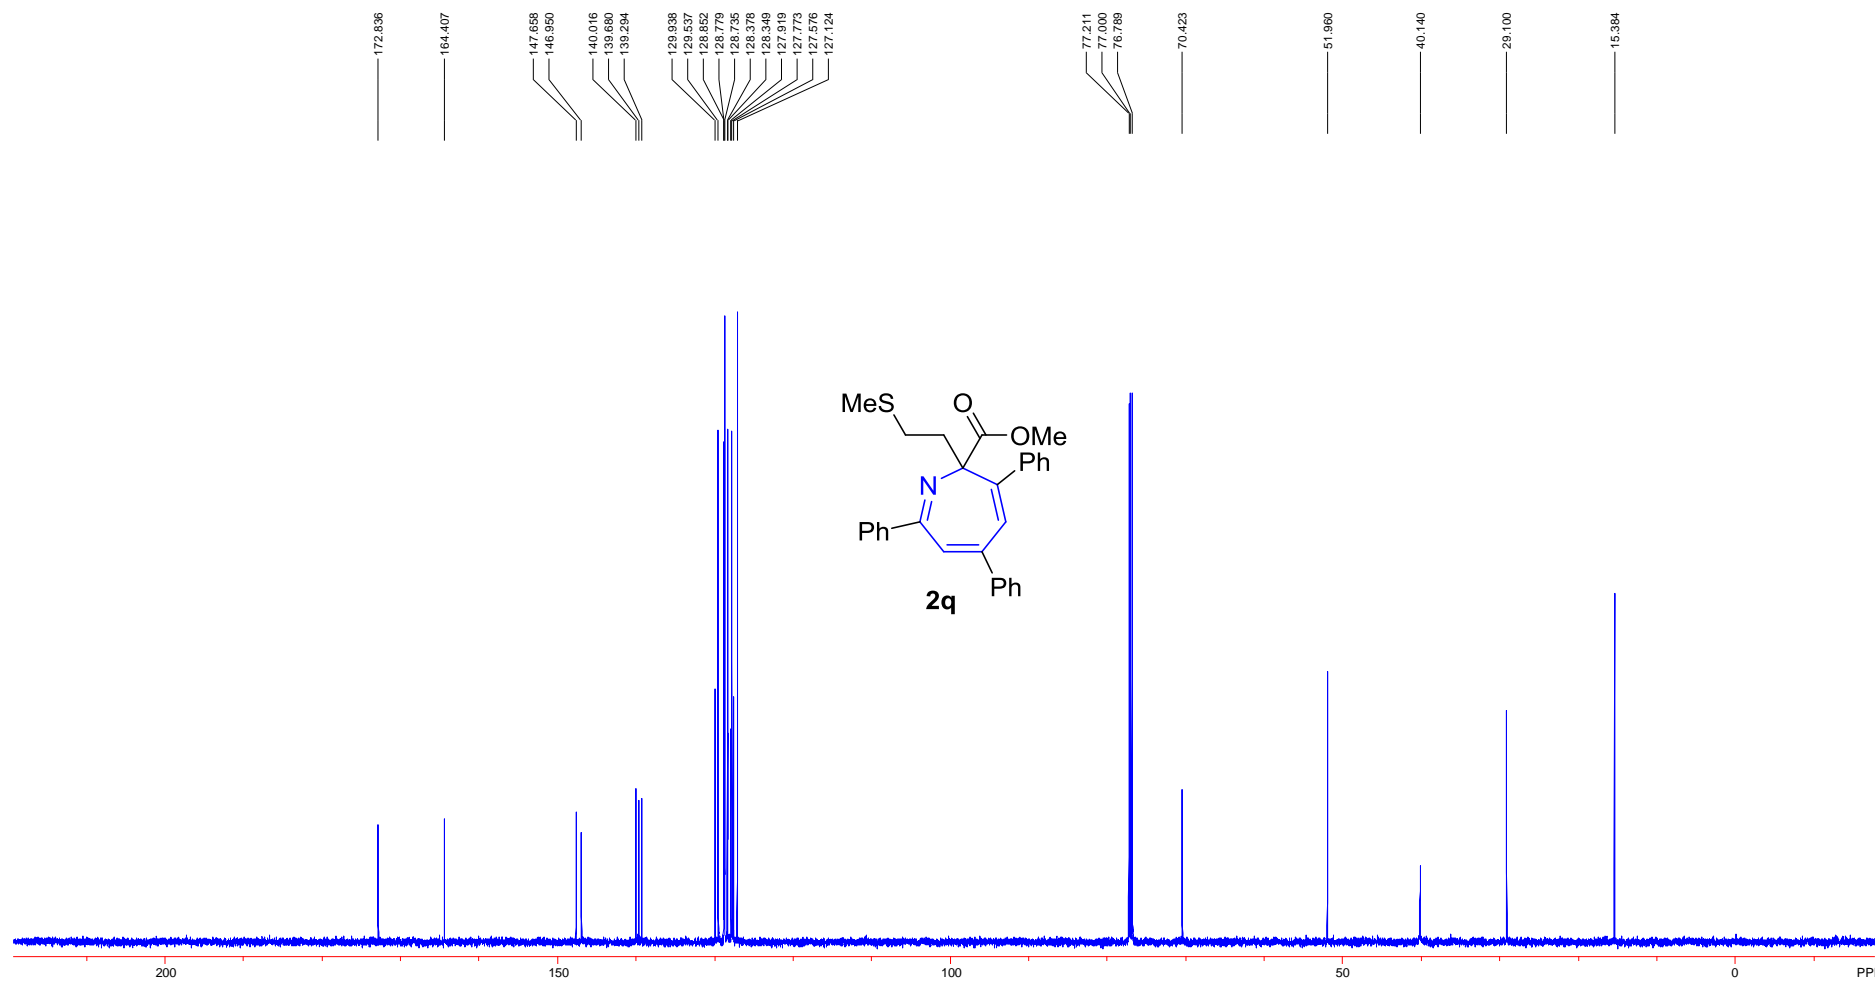



$^1\text{H}$  NMR(600 MHz,  $\text{CDCl}_3$ )

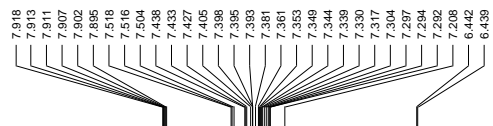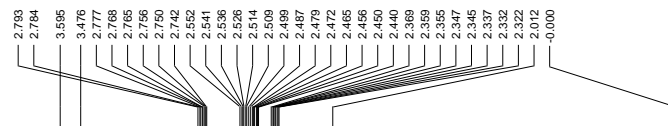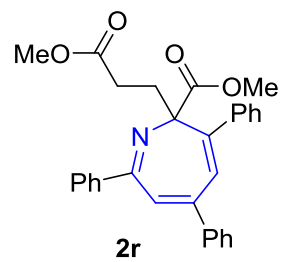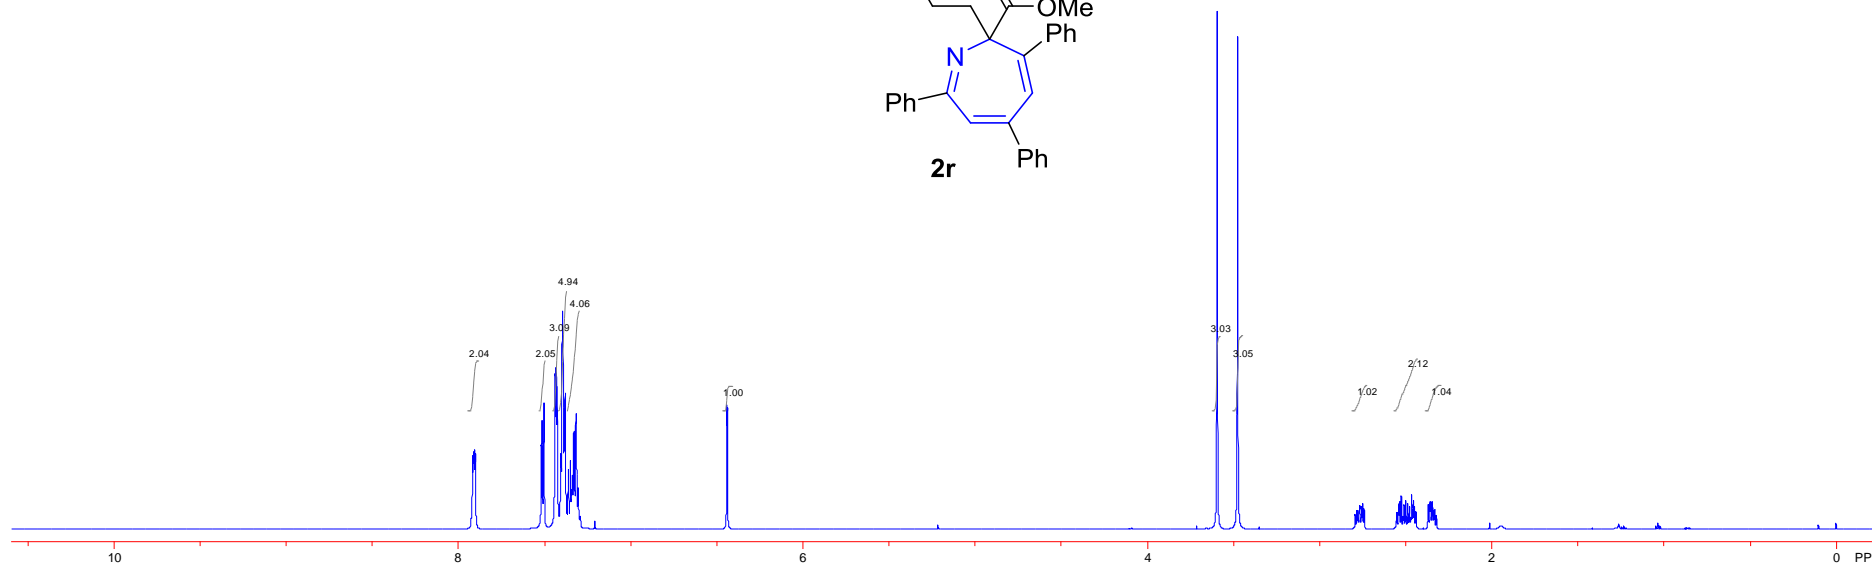

$^{13}\text{C}$  NMR (150 MHz,  $\text{CDCl}_3$ )

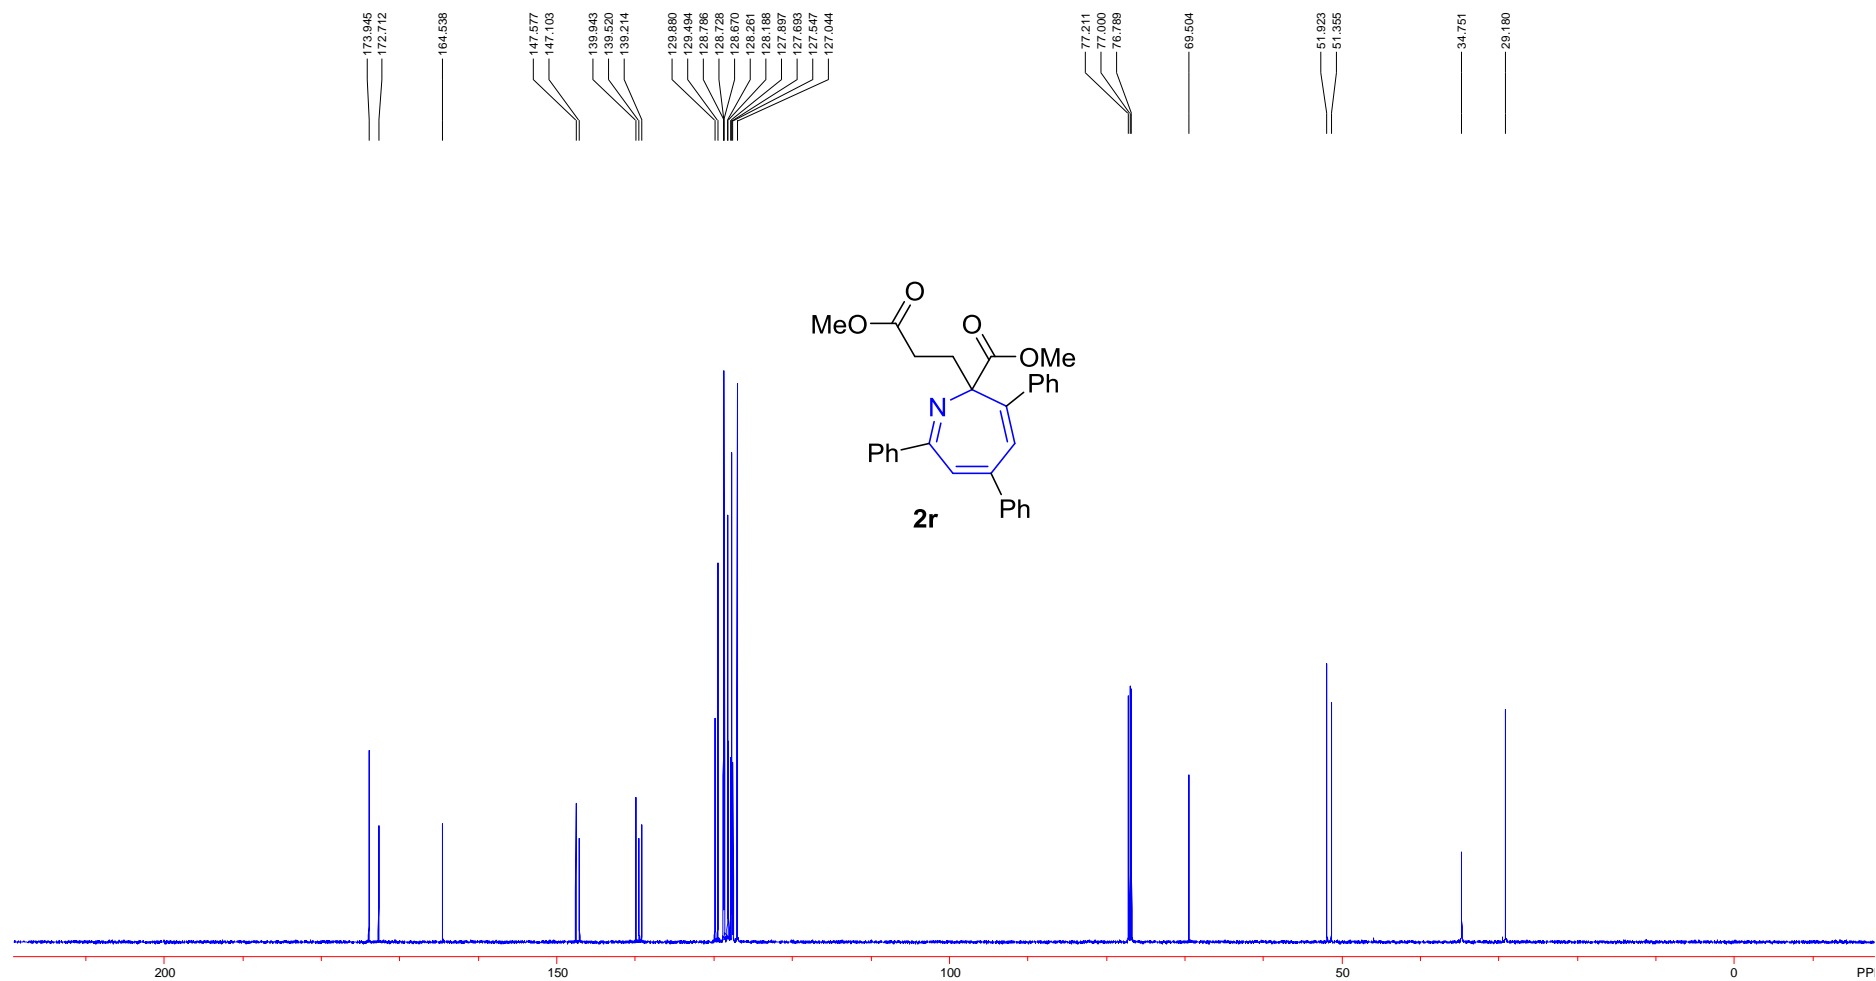

$^1\text{H}$  NMR(600 MHz,  $\text{CDCl}_3$ )

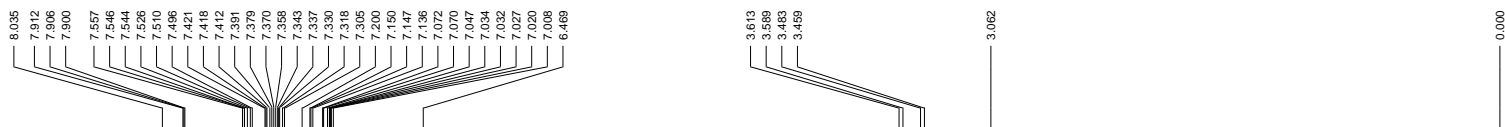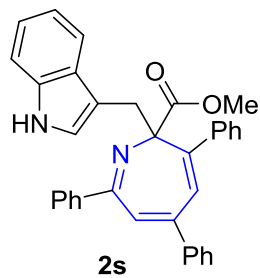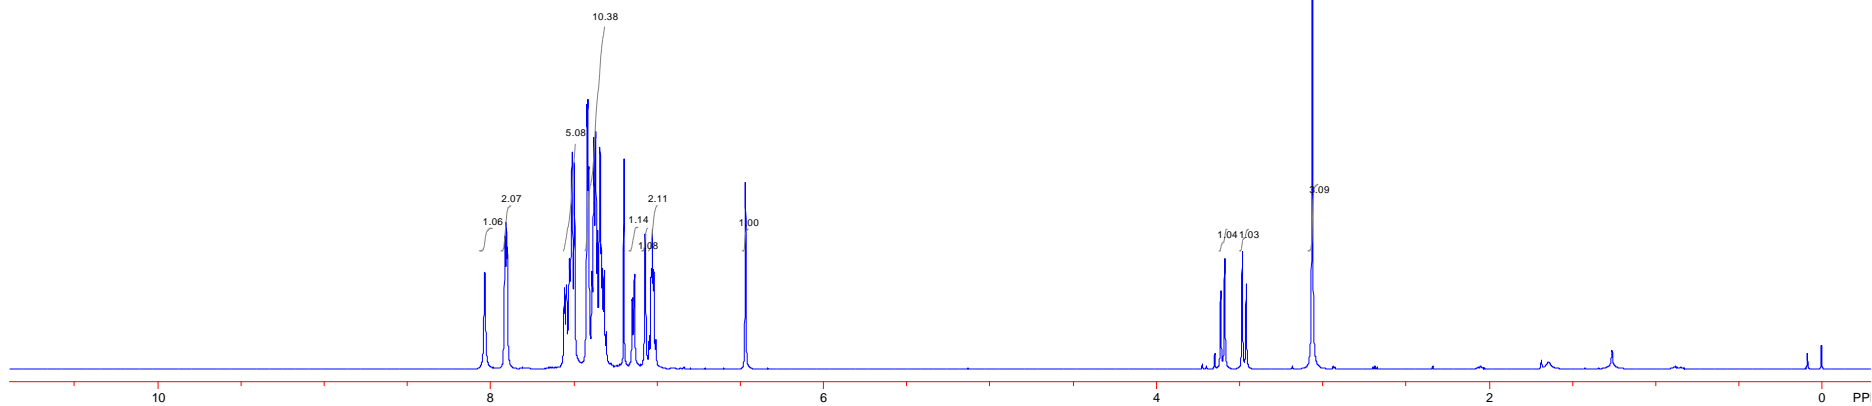

$^{13}\text{C}$  NMR (100 MHz,  $\text{CDCl}_3$ )

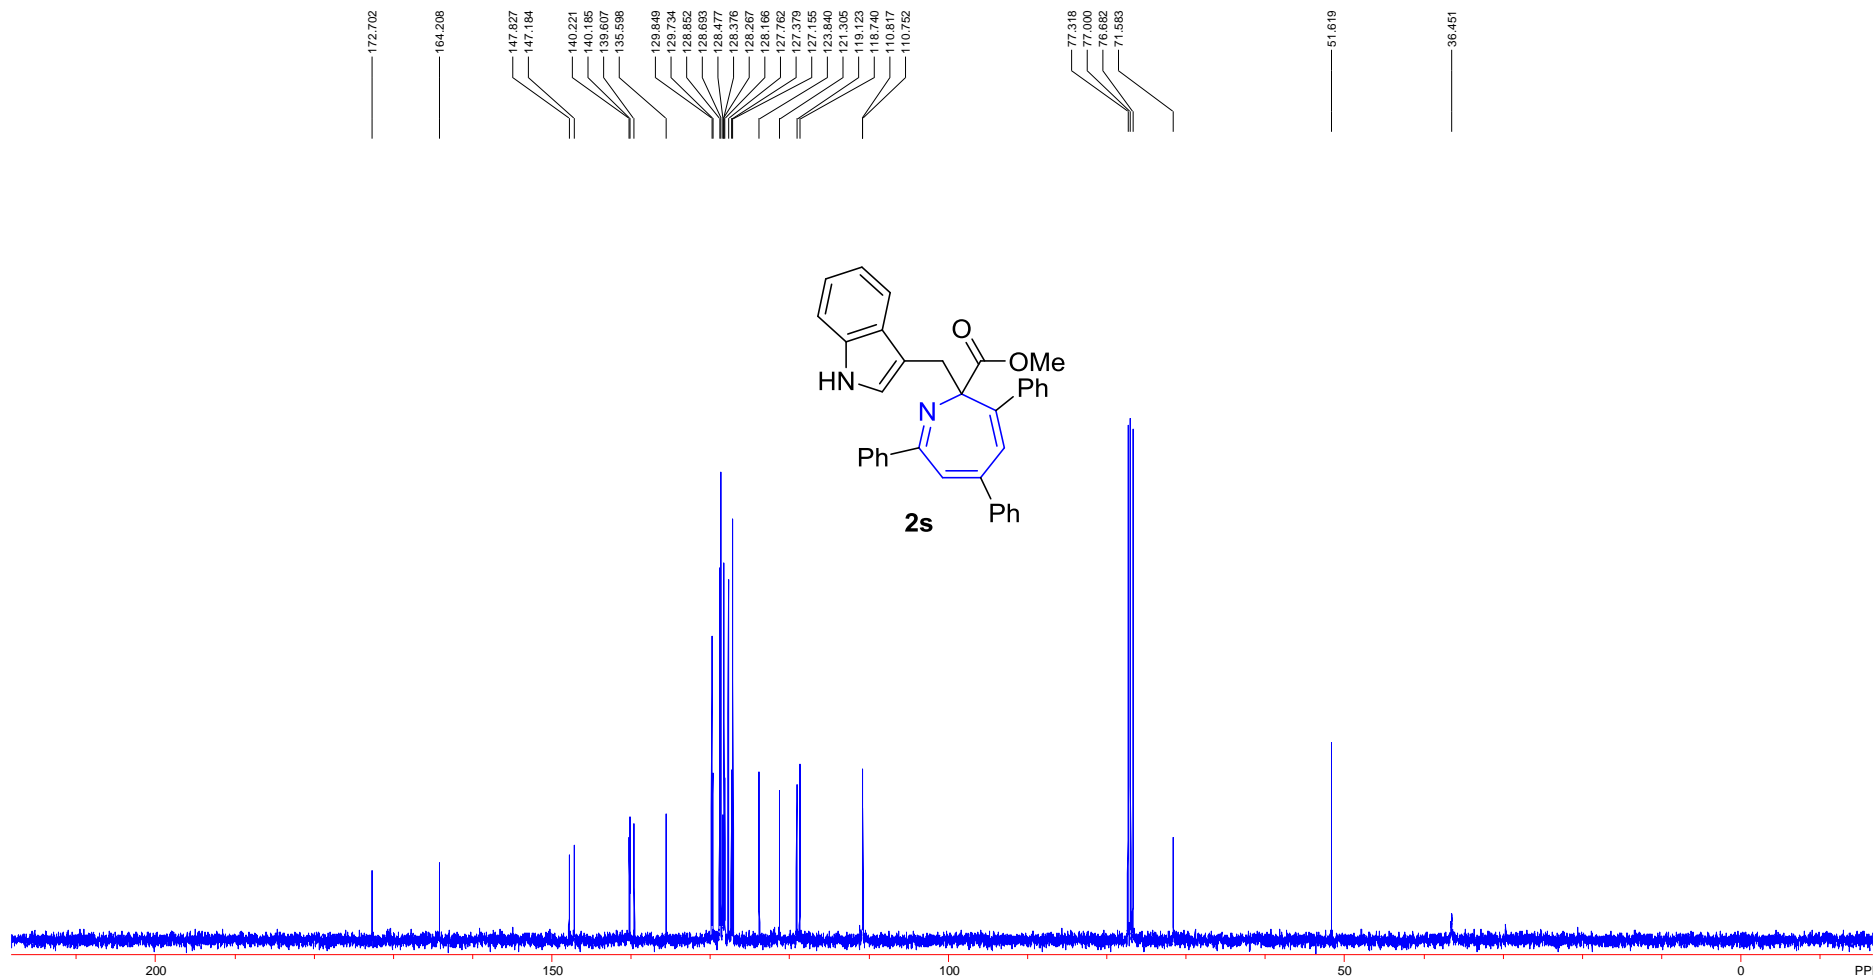

$^1\text{H}$  NMR(600 MHz,  $\text{CDCl}_3$ )

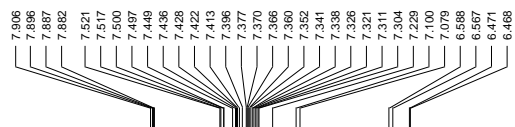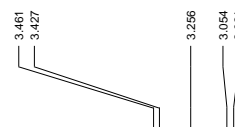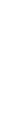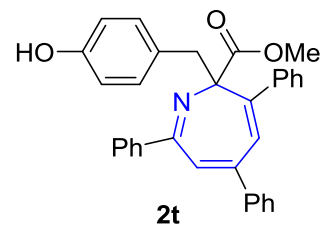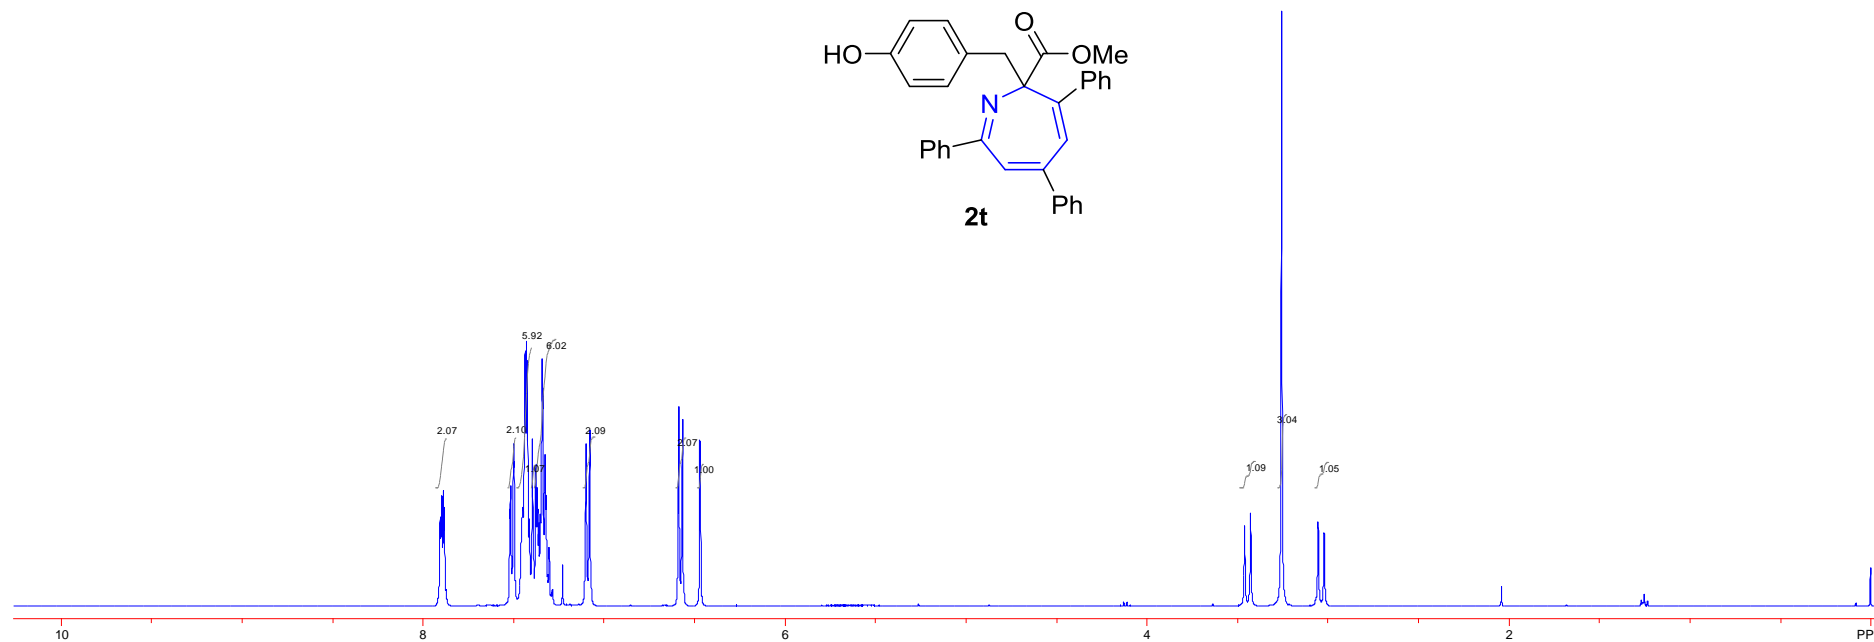

$^{13}\text{C}$  NMR (150 MHz,  $\text{CDCl}_3$ )

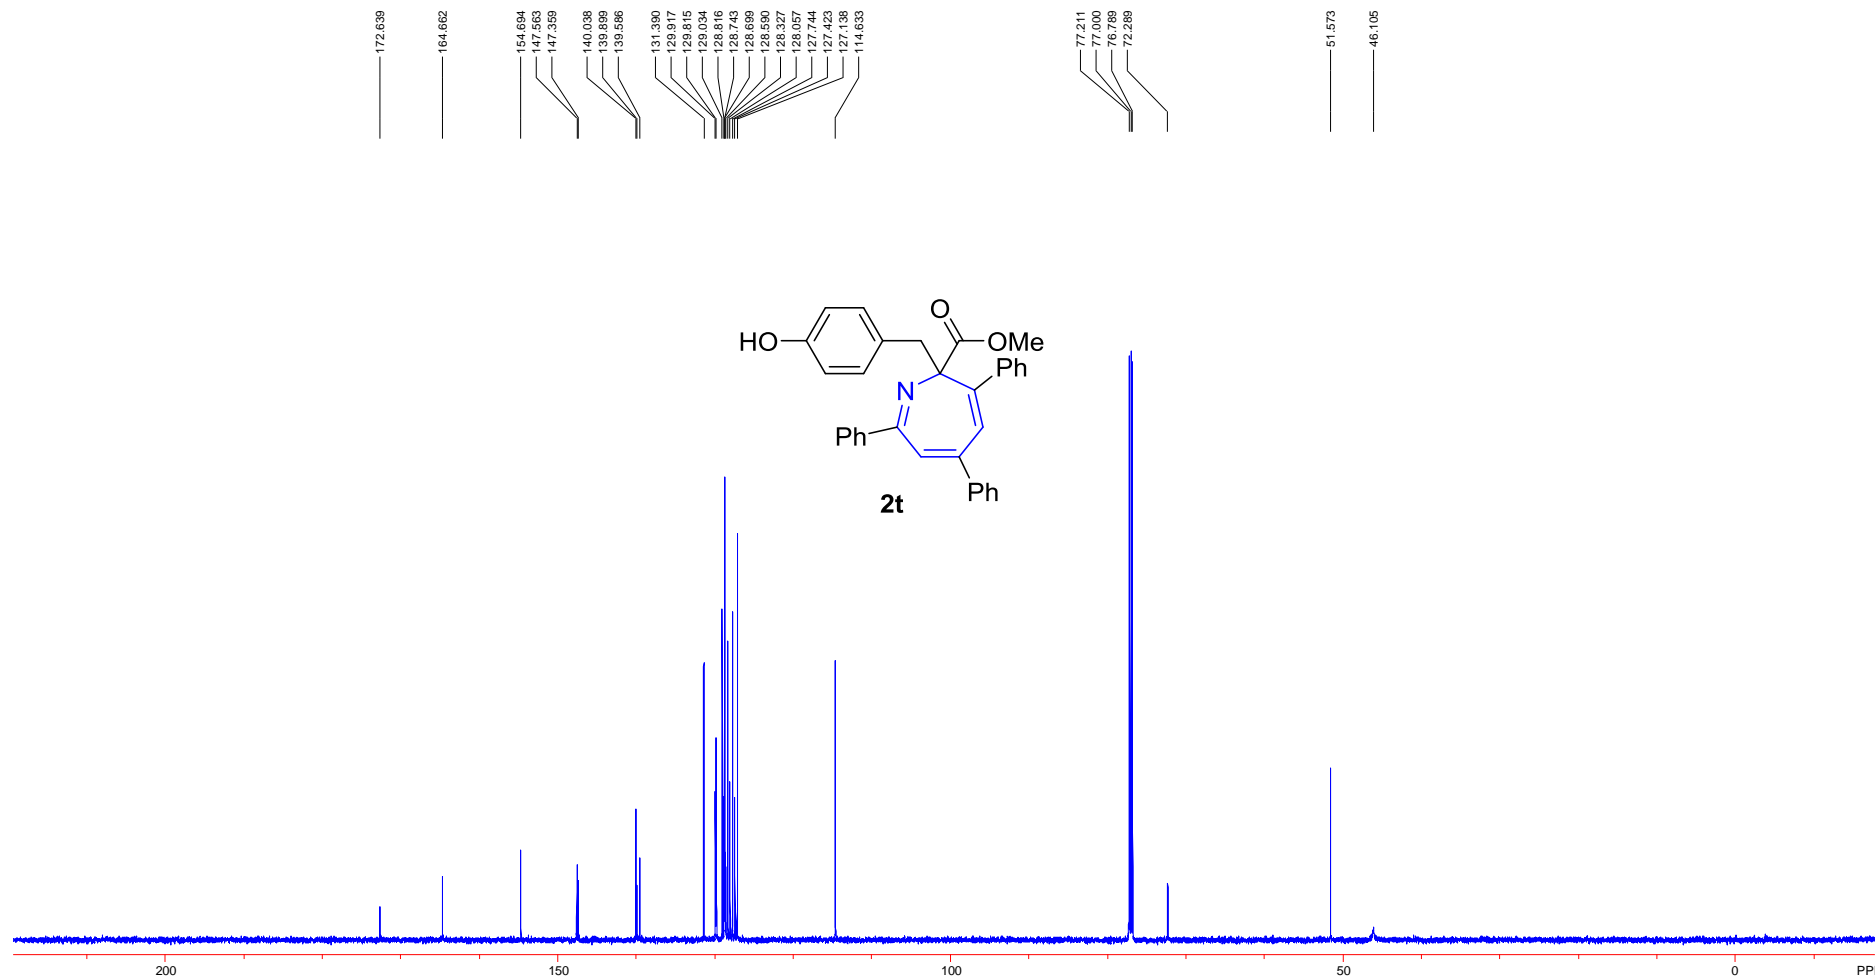

$^1\text{H}$  NMR(400 MHz,  $\text{CDCl}_3$ )

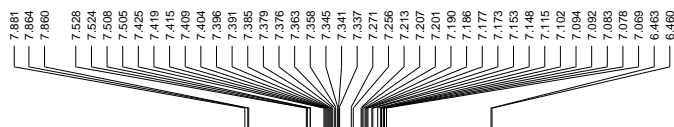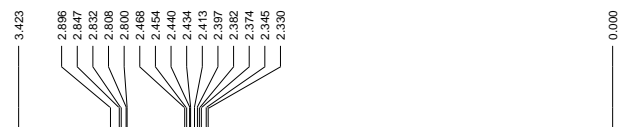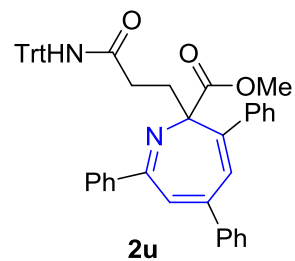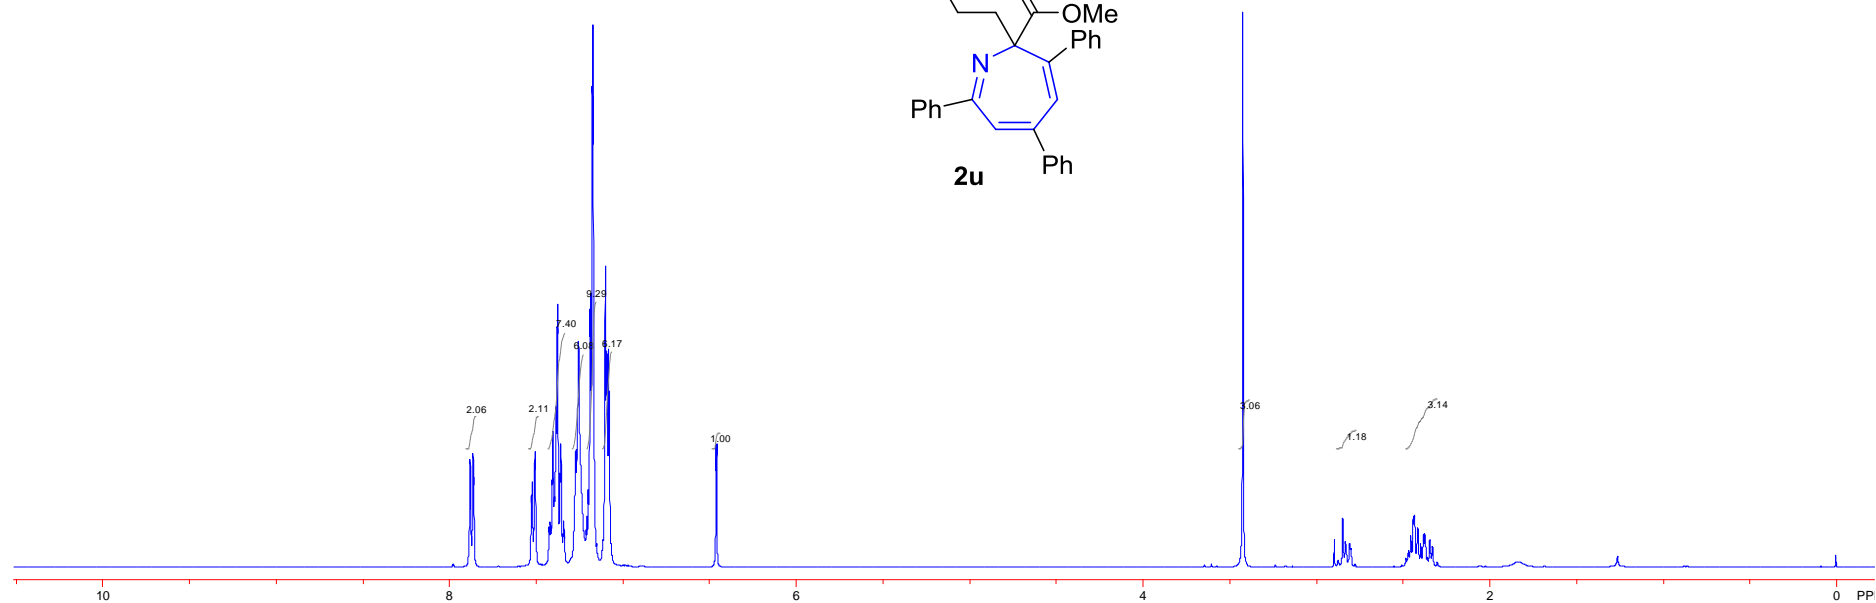

$^{13}\text{C}$  NMR (100 MHz,  $\text{CDCl}_3$ )

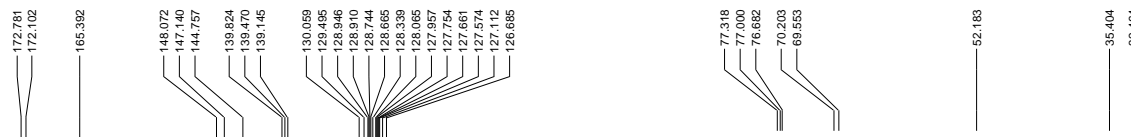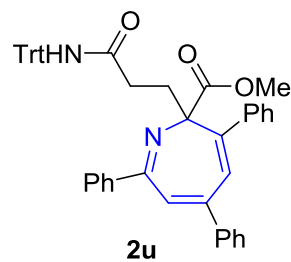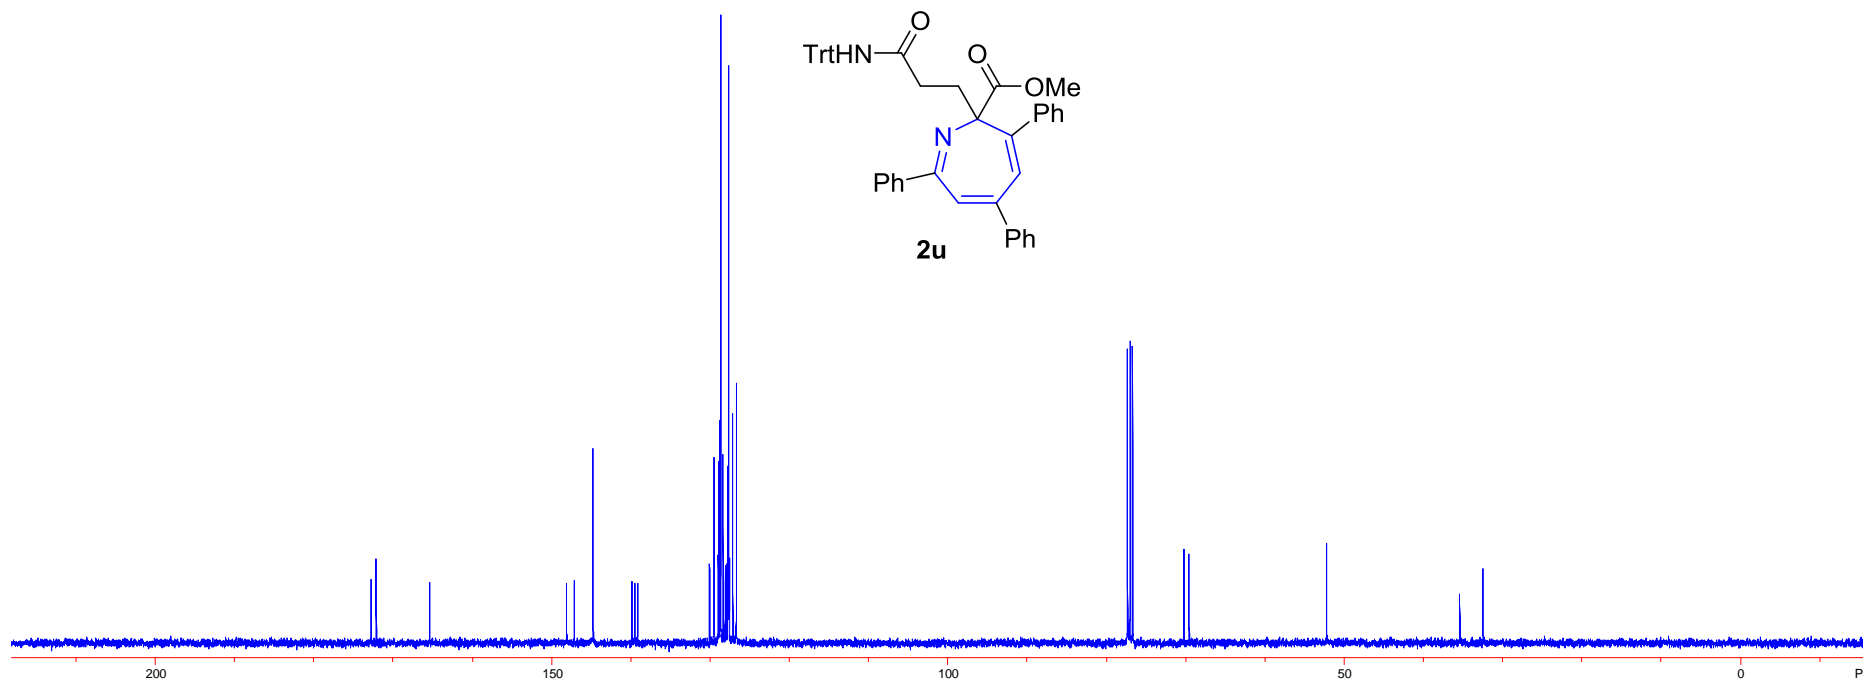



$^1\text{H}$  NMR(600 MHz,  $\text{CDCl}_3$ )

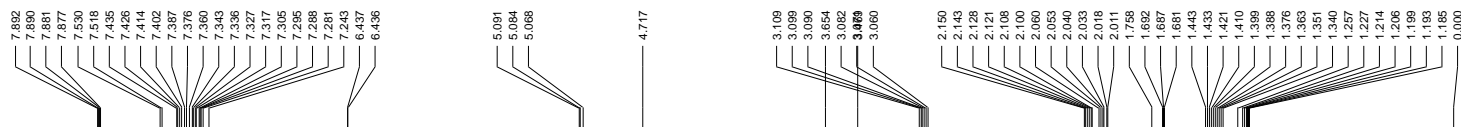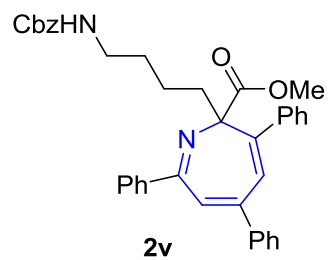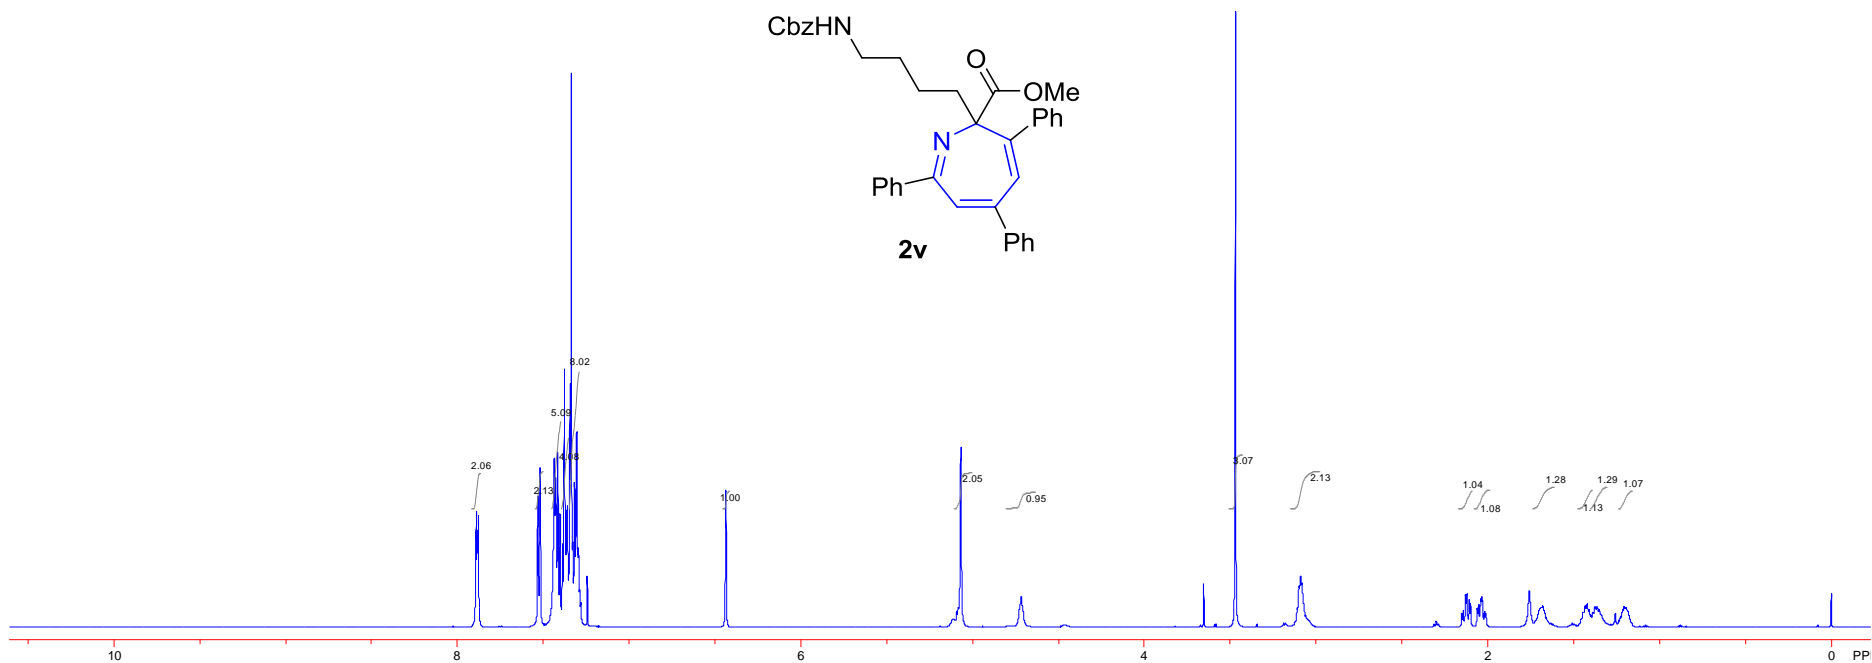

$^{13}\text{C}$  NMR (150 MHz,  $\text{CDCl}_3$ )

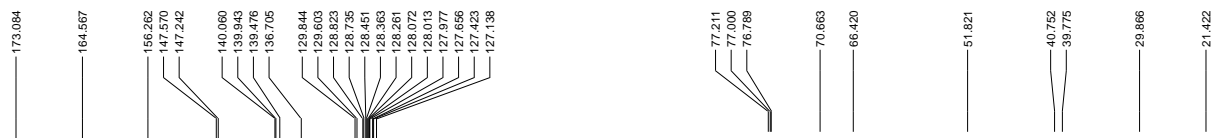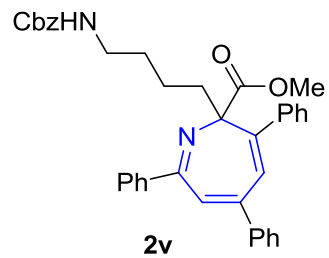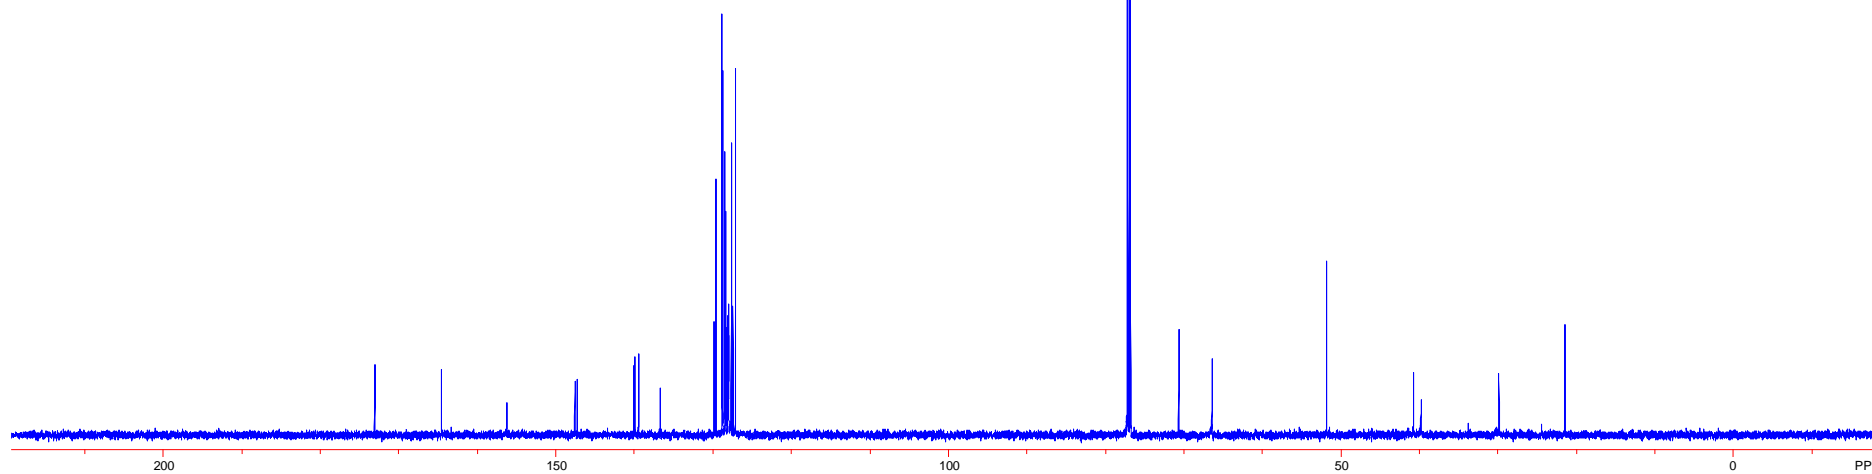

$^1\text{H}$  NMR(400 MHz,  $\text{CDCl}_3$ )

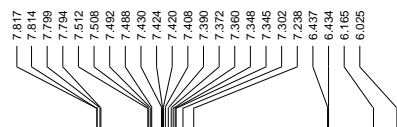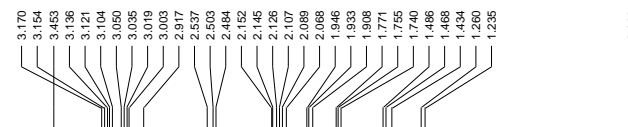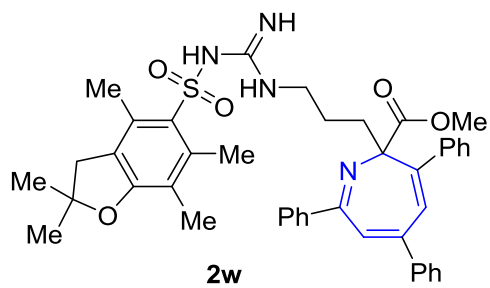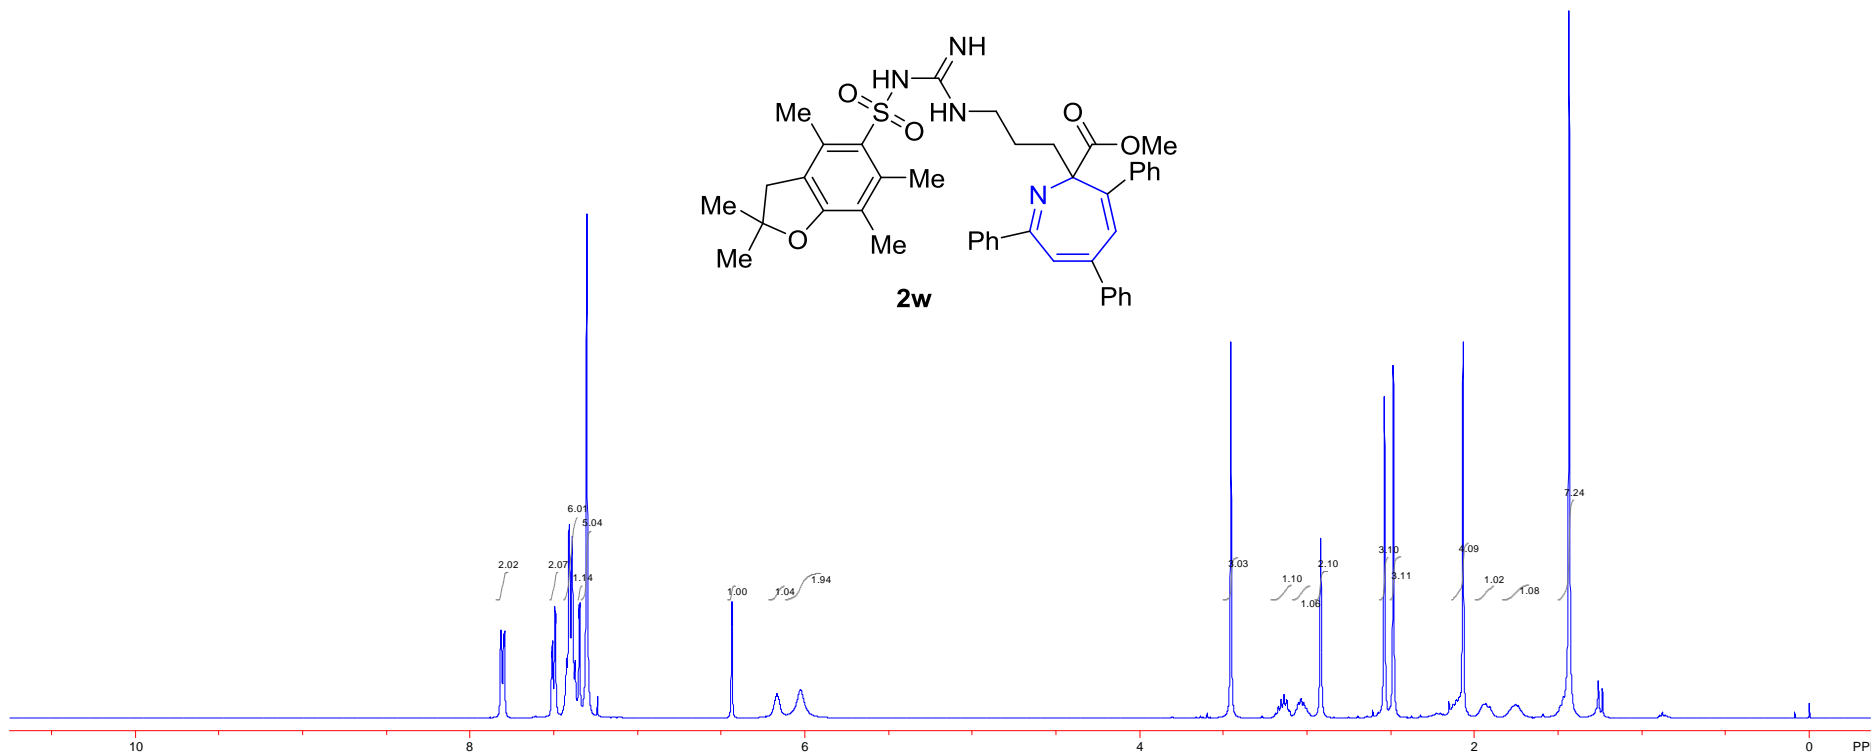

$^{13}\text{C}$  NMR (100 MHz,  $\text{CDCl}_3$ )

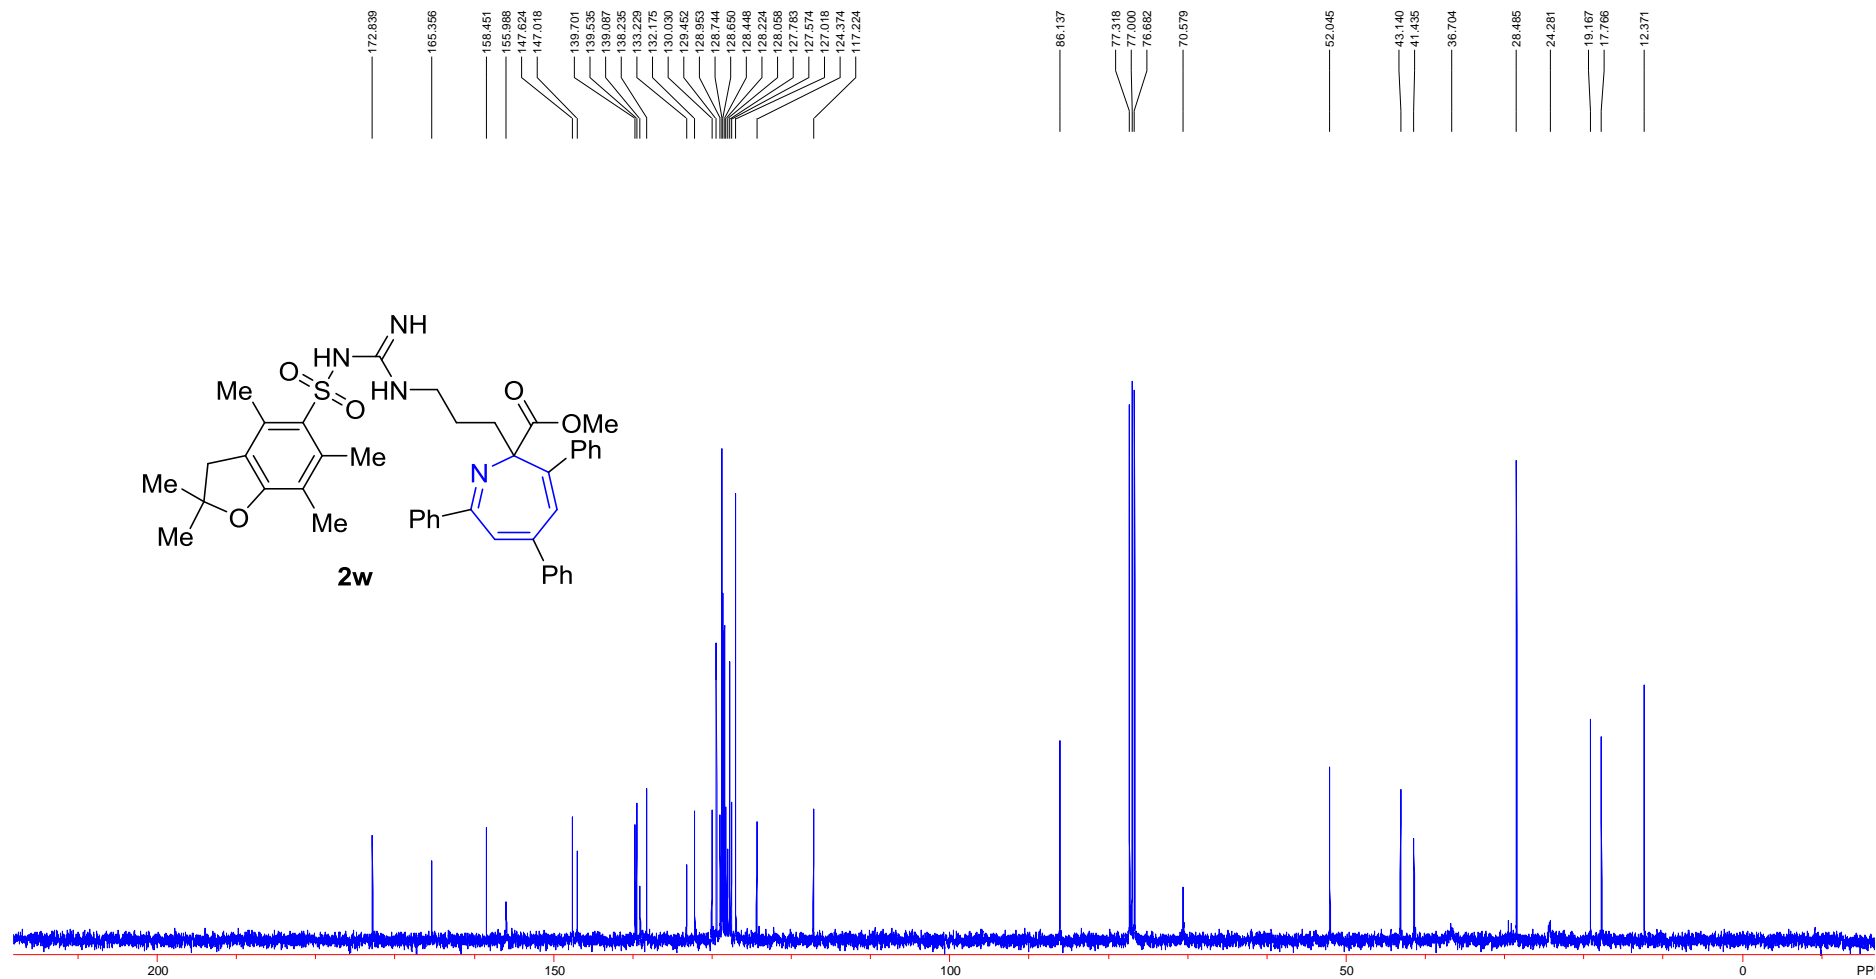

$^1\text{H}$  NMR(400 MHz,  $\text{CDCl}_3$ )

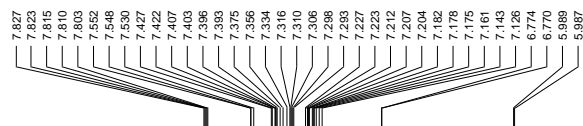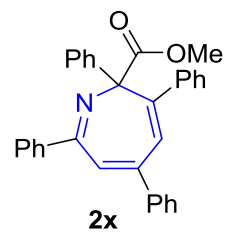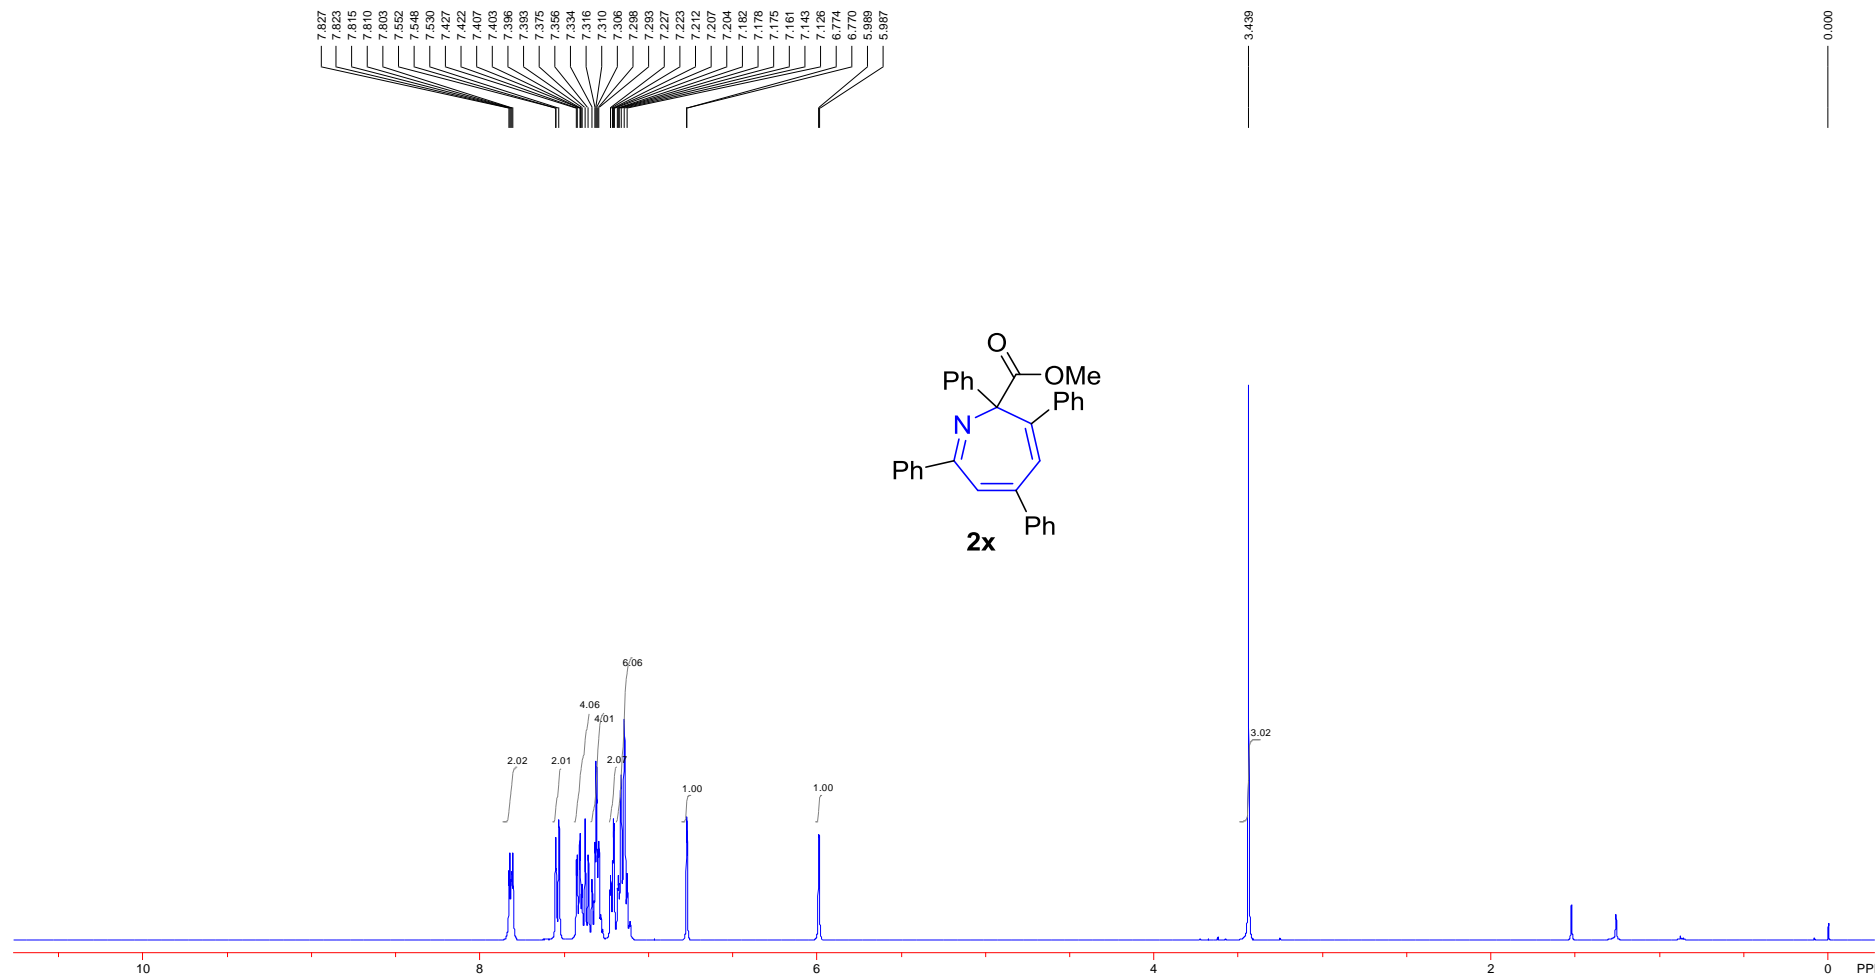

$^{13}\text{C}$  NMR (100 MHz,  $\text{CDCl}_3$ )

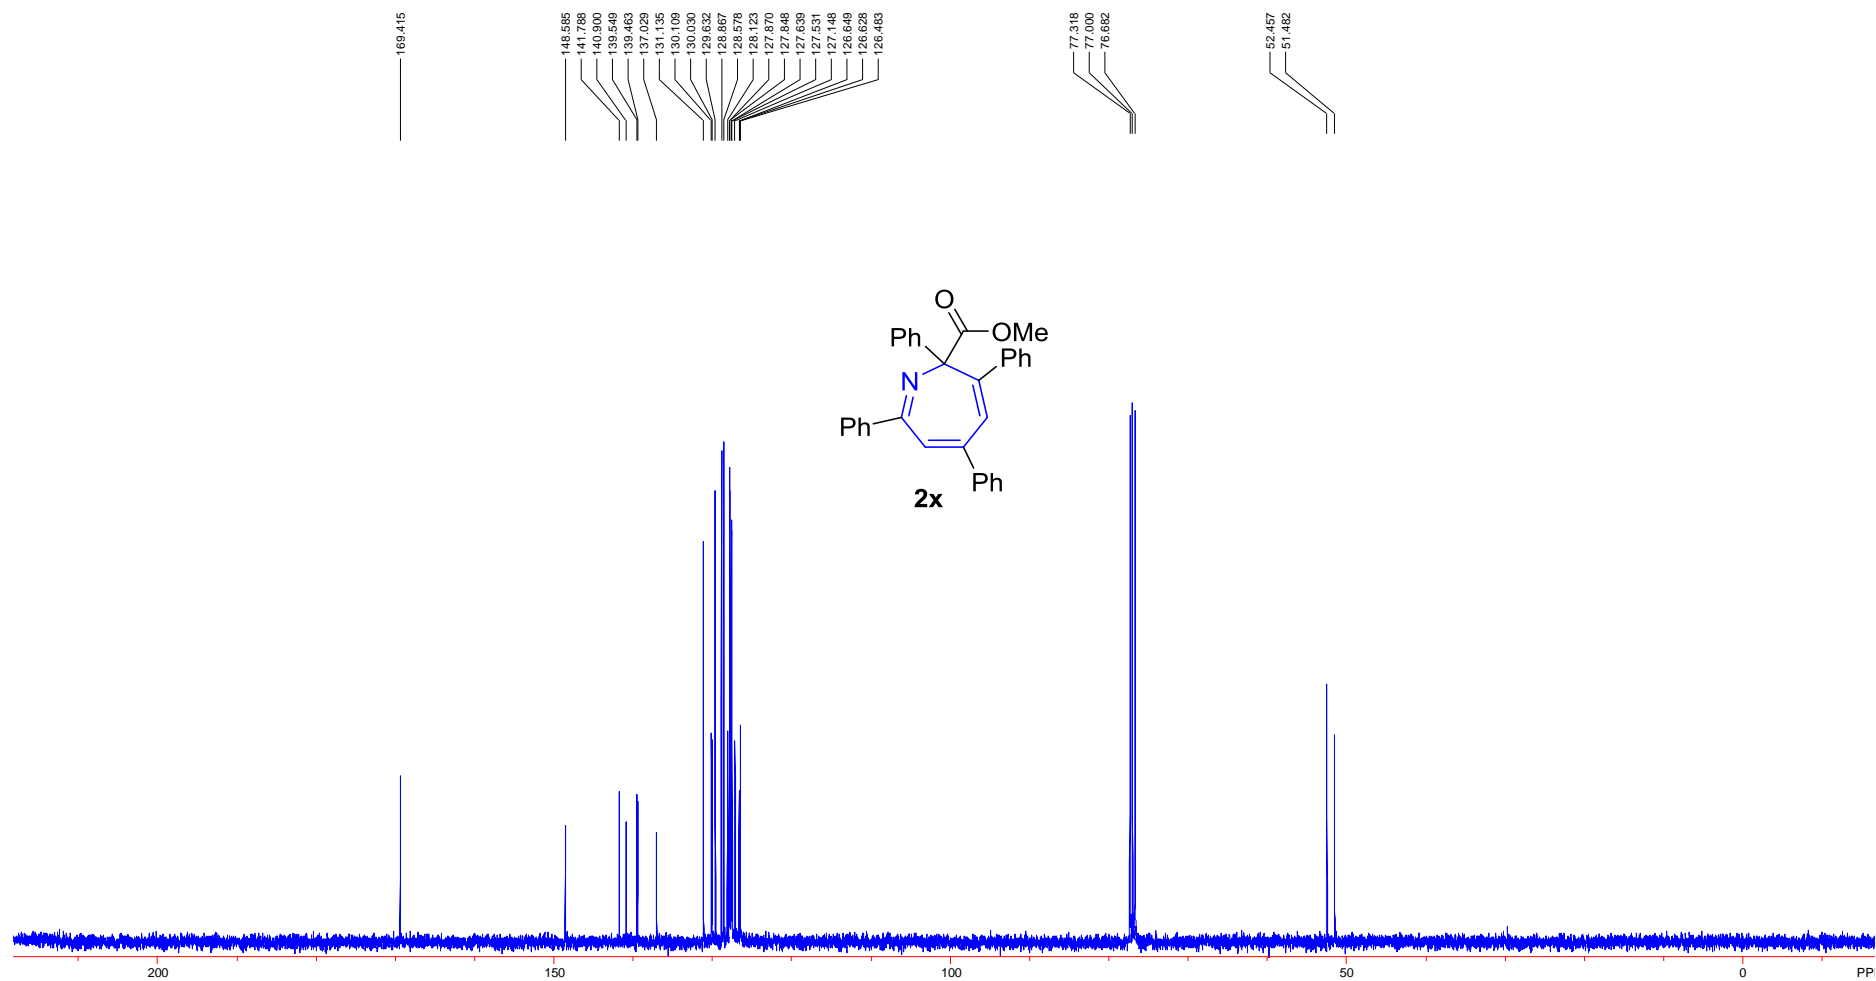

$^1\text{H}$  NMR(400 MHz,  $\text{CDCl}_3$ )

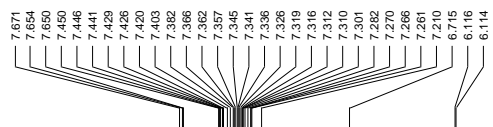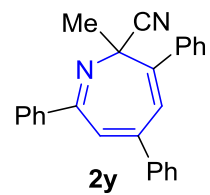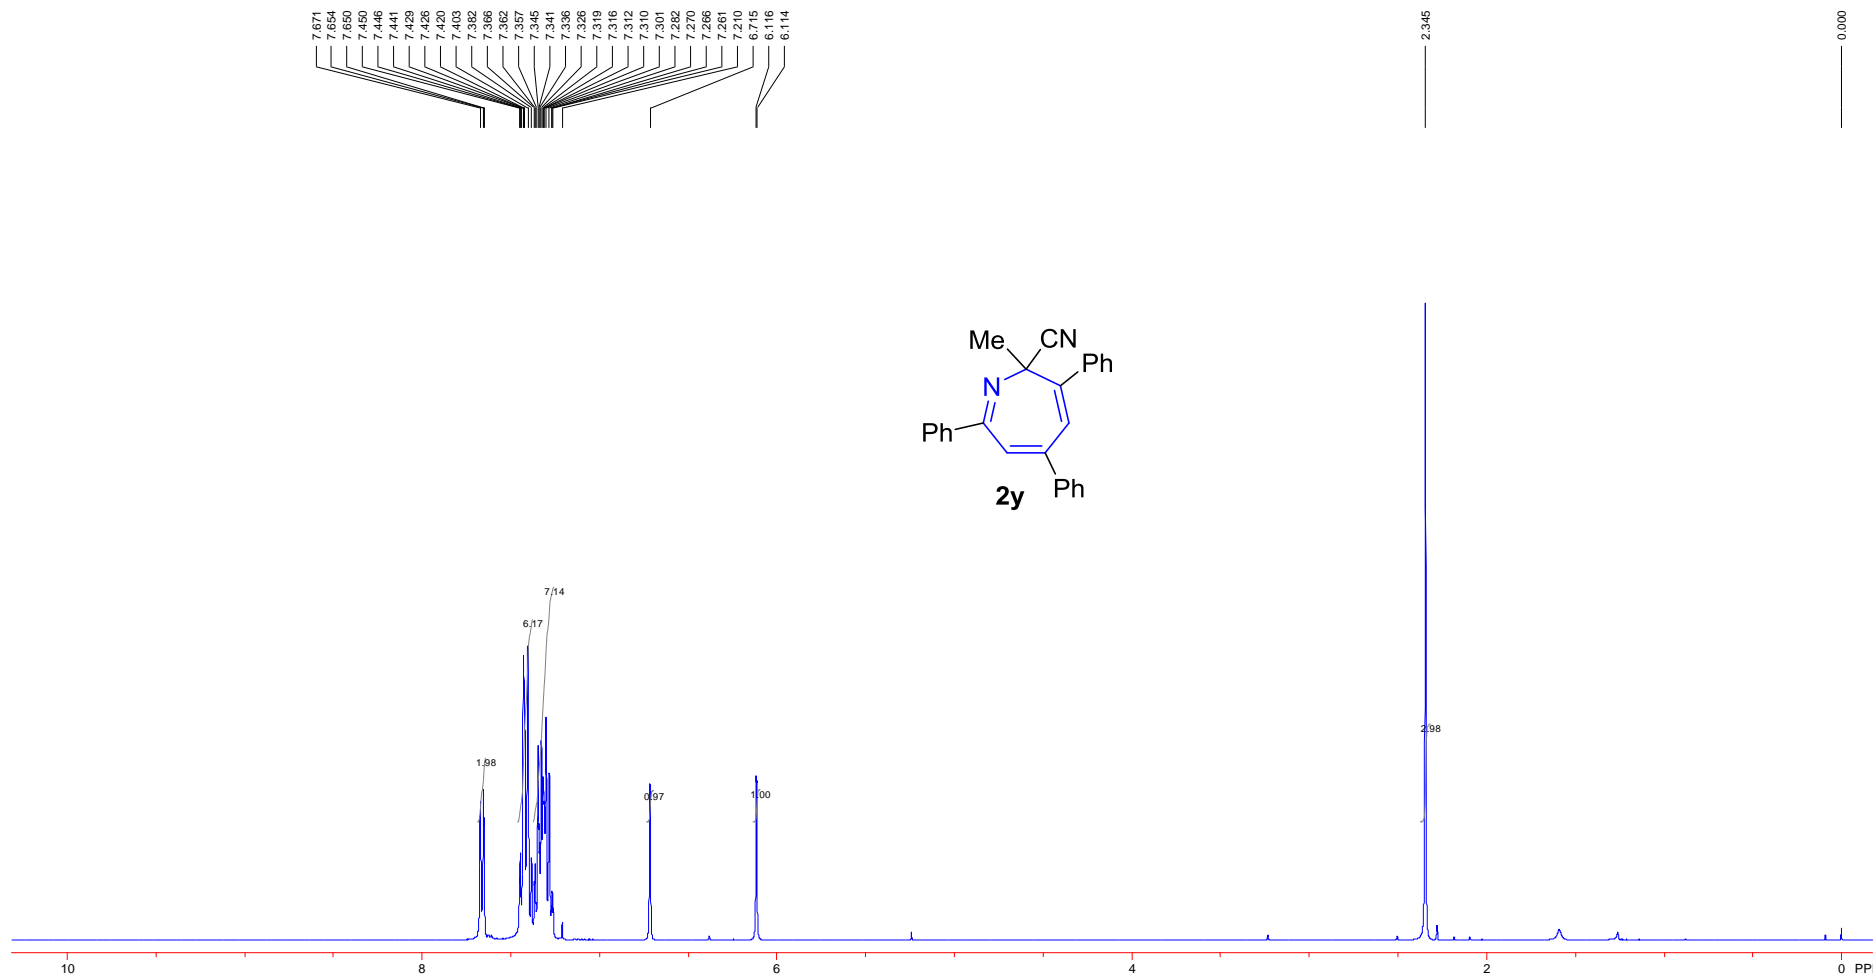

$^{13}\text{C}$  NMR (100 MHz,  $\text{CDCl}_3$ )

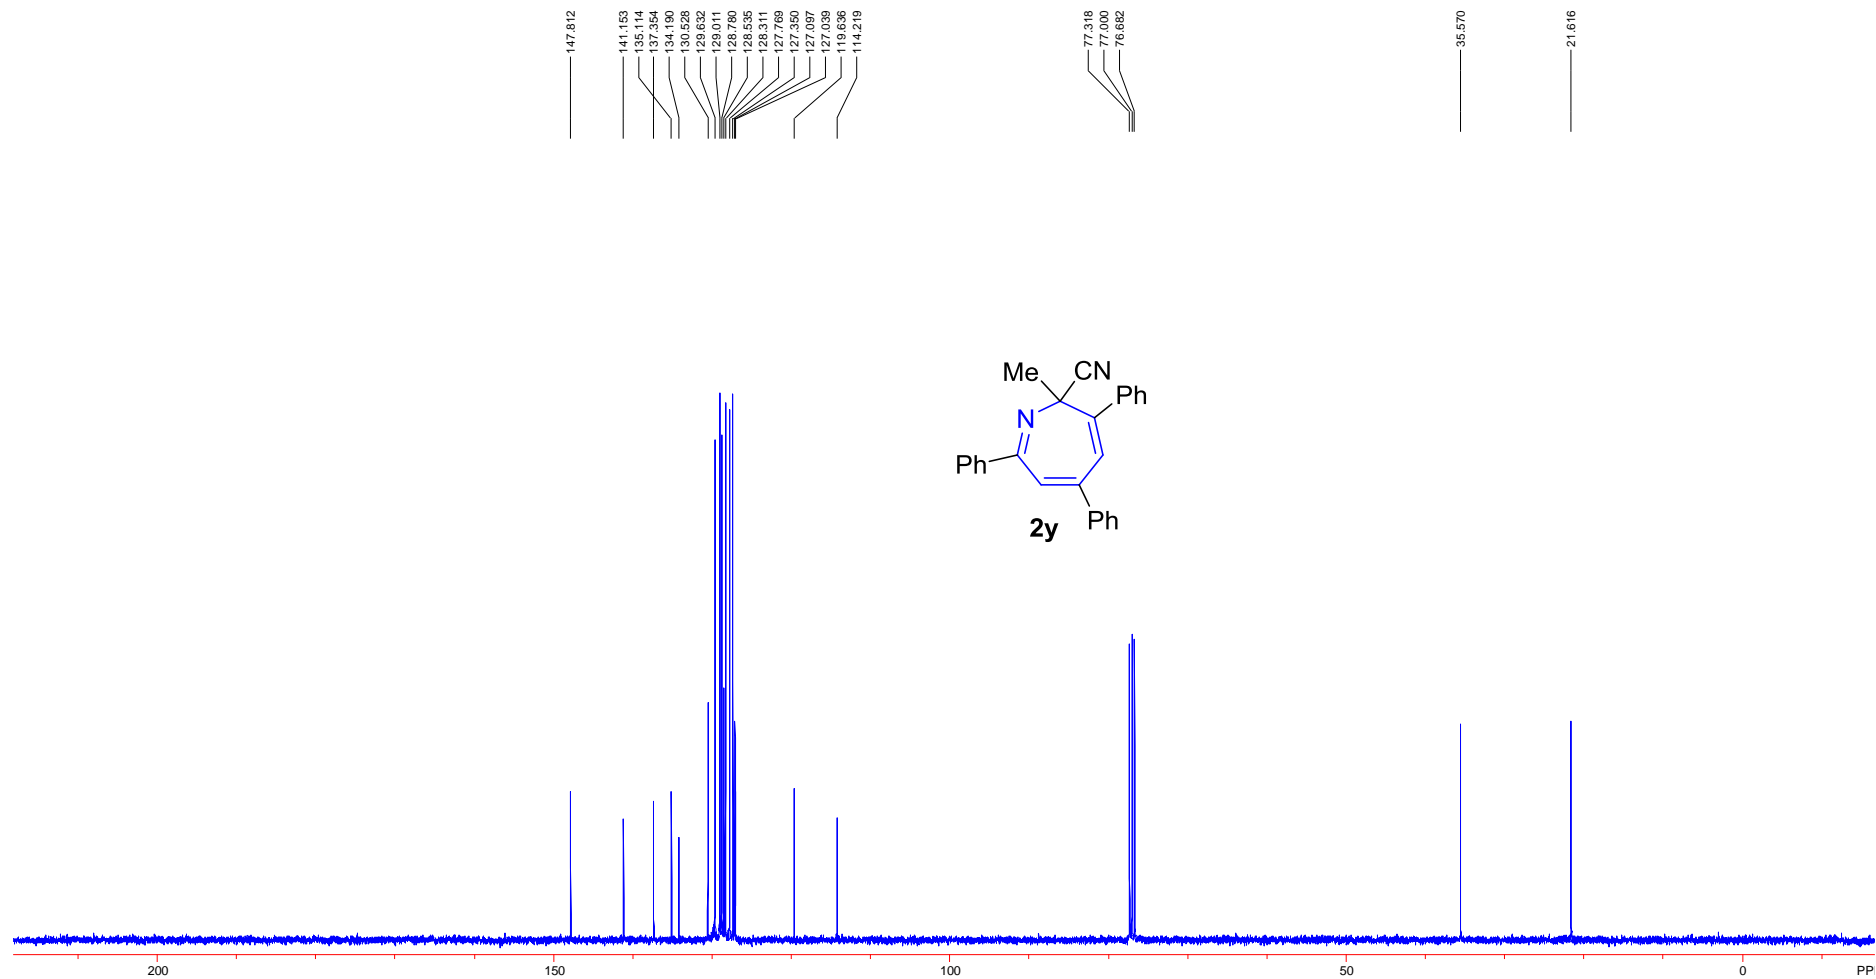



$^1\text{H}$  NMR(600 MHz,  $\text{CDCl}_3$ )

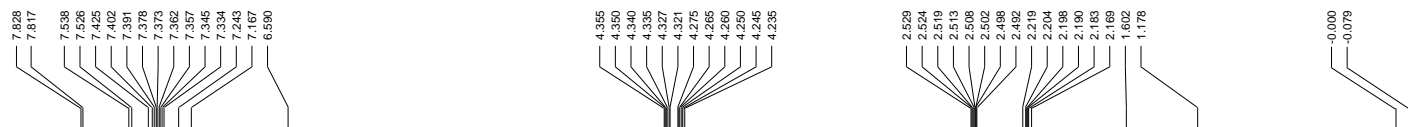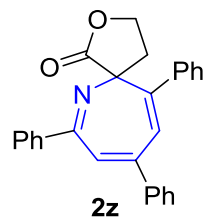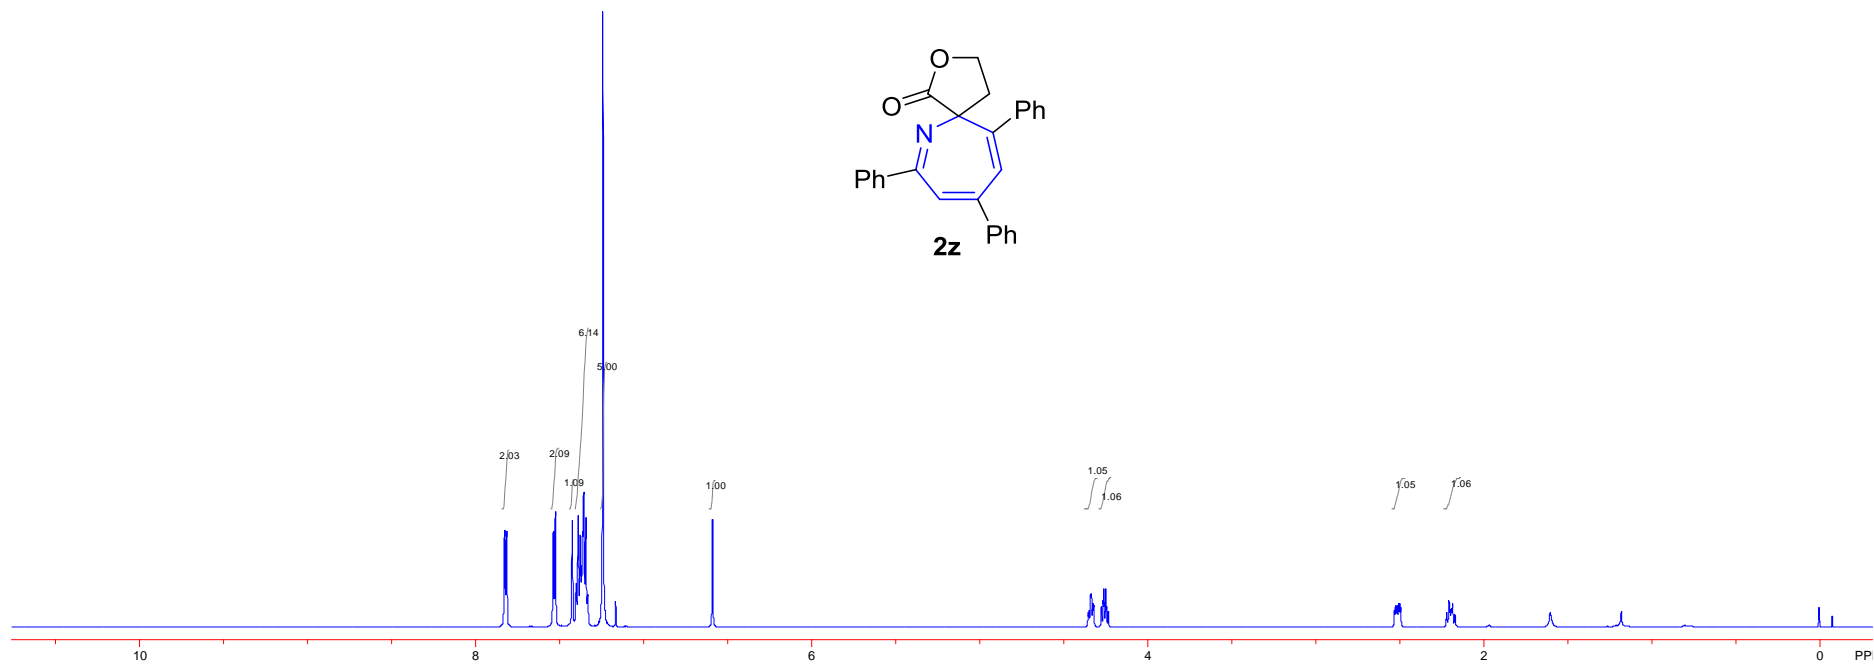

$^{13}\text{C}$  NMR (150 MHz,  $\text{CDCl}_3$ )

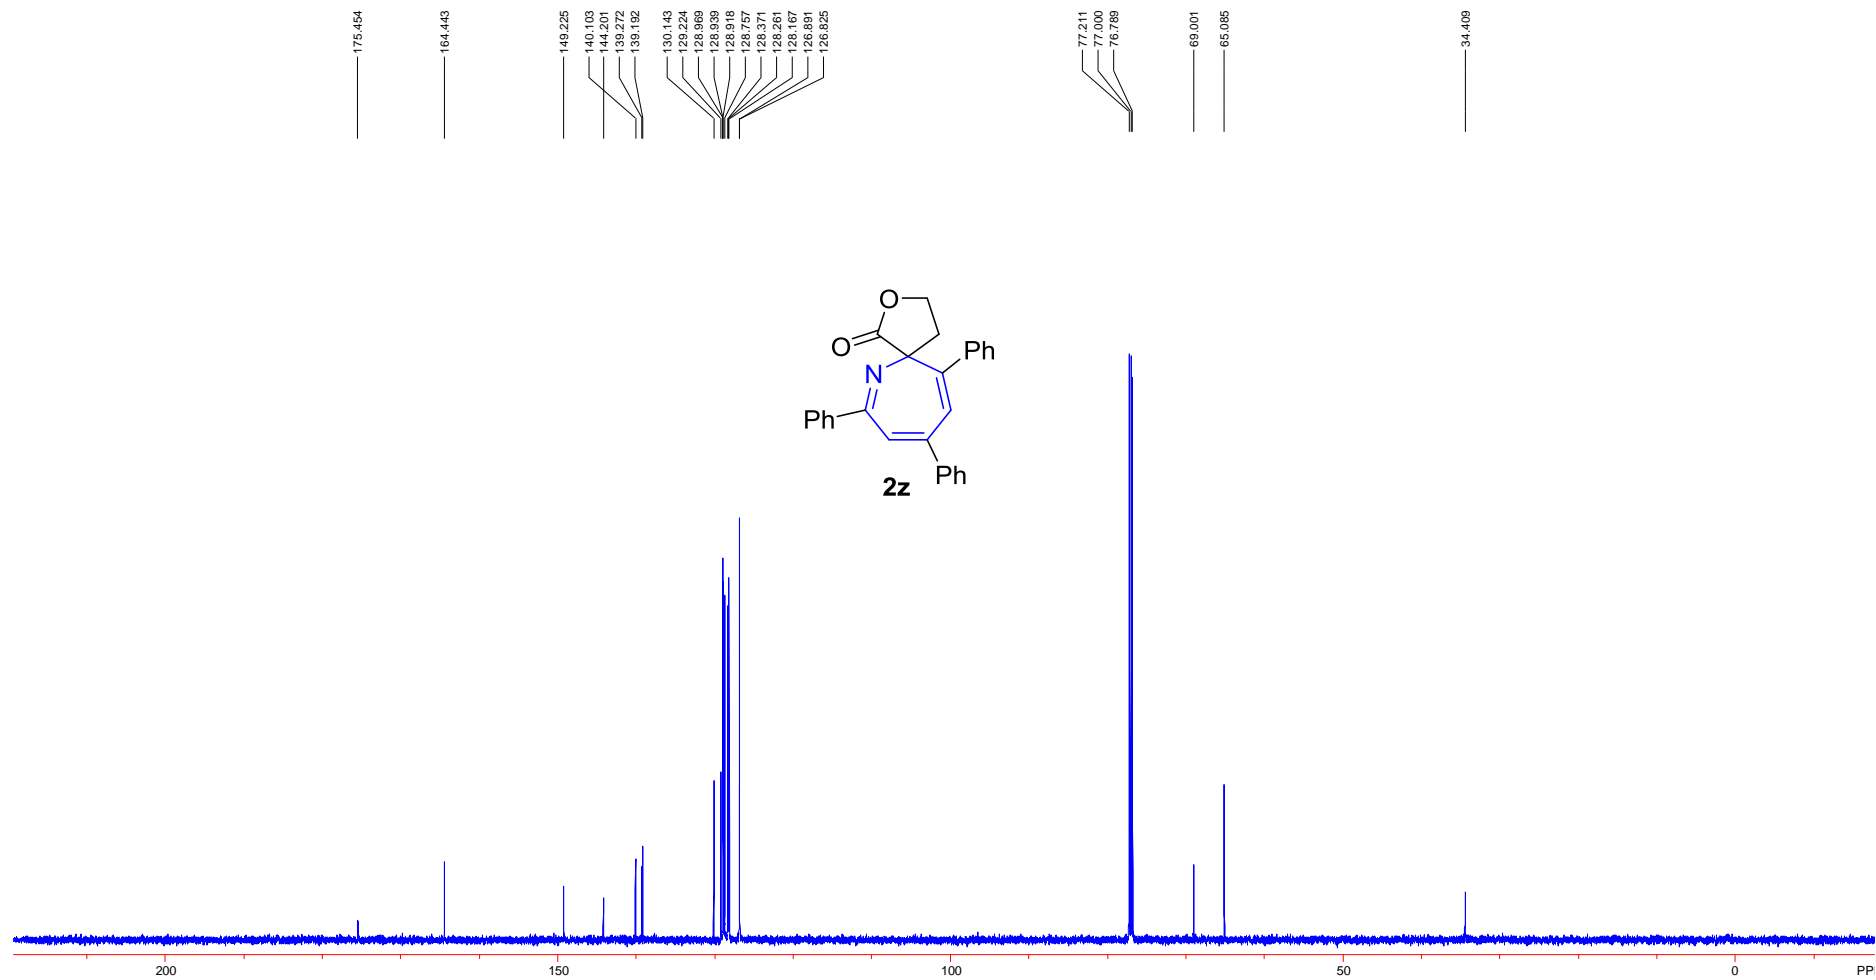

$^1\text{H}$  NMR(600 MHz,  $\text{CDCl}_3$ )

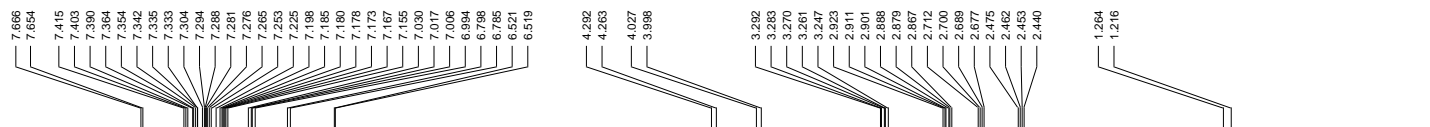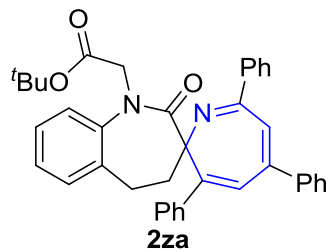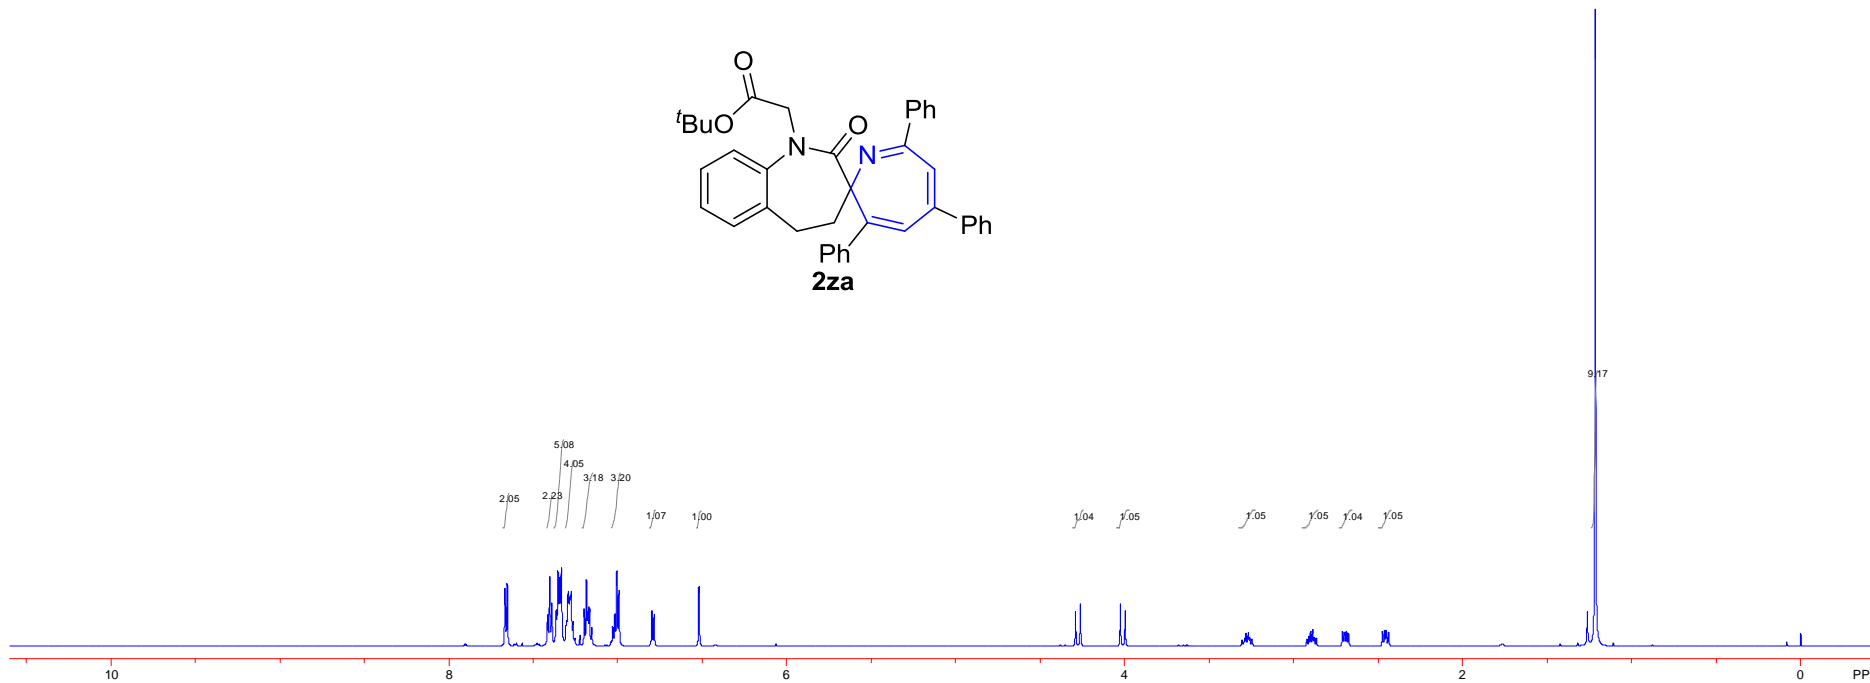

$^{13}\text{C}$  NMR (150 MHz,  $\text{CDCl}_3$ )

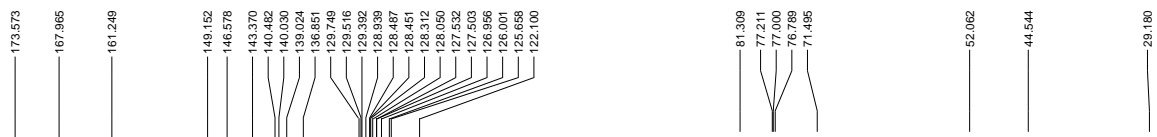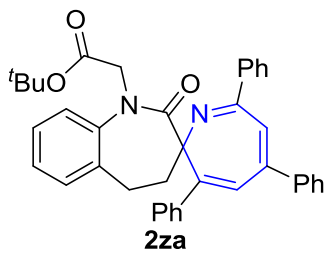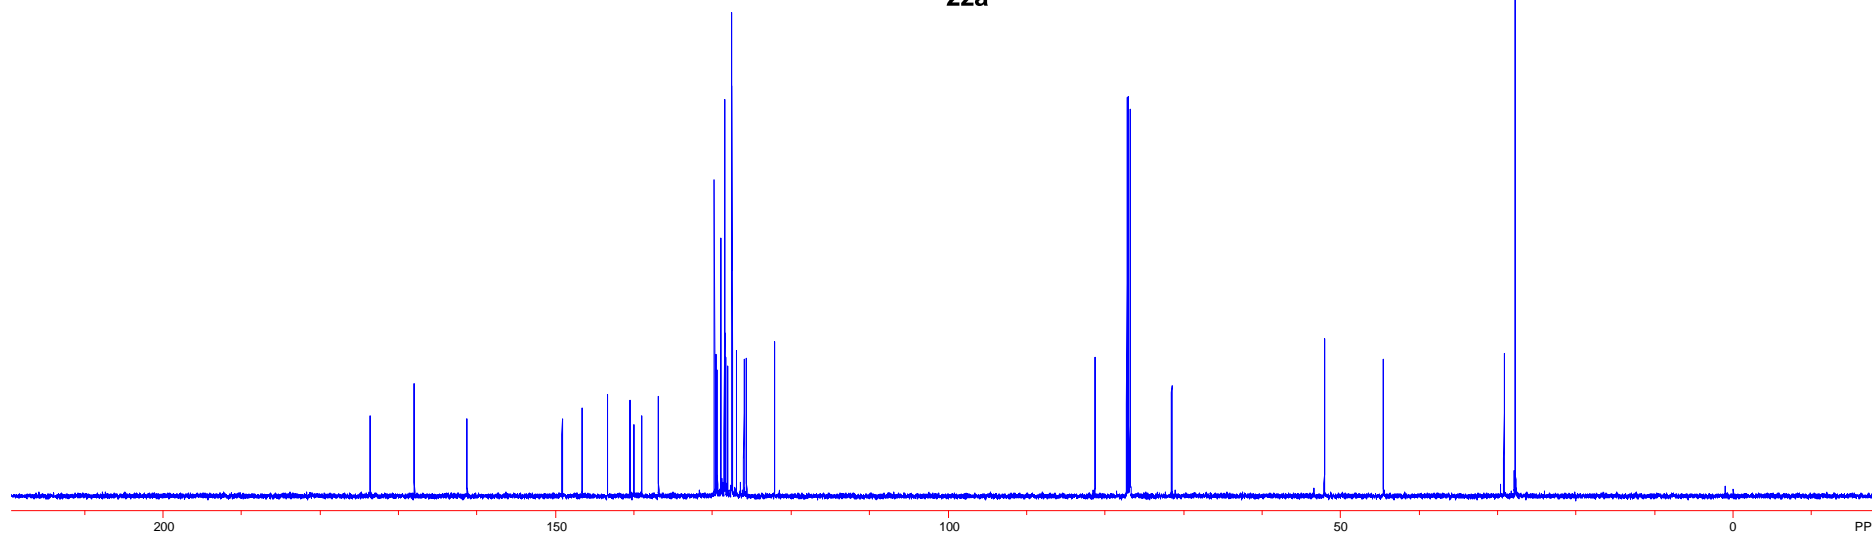

$^1\text{H NMR}$ (400 MHz,  $\text{CDCl}_3$ )

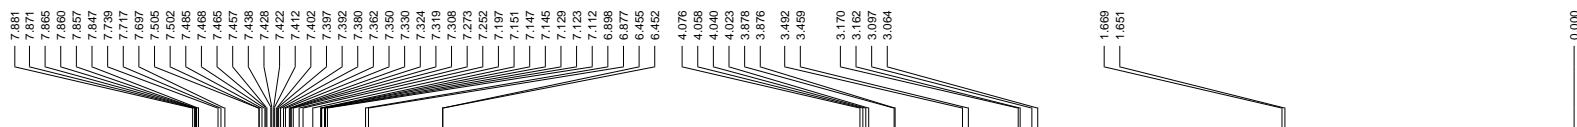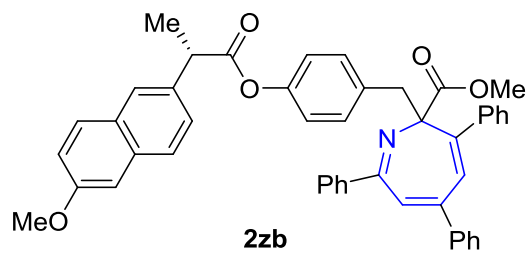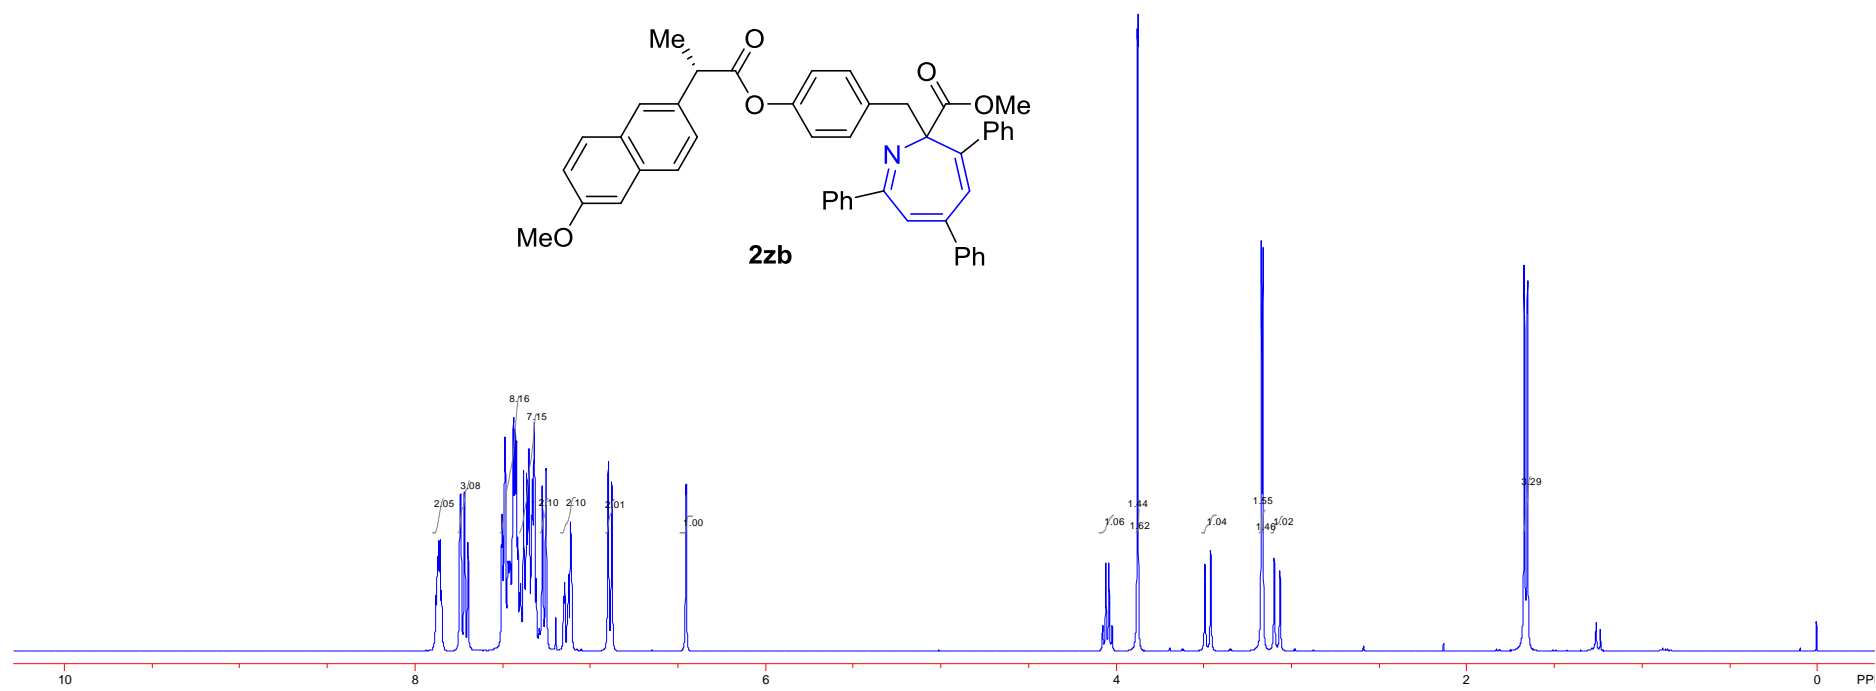

$^{13}\text{C}$  NMR (150 MHz,  $\text{CDCl}_3$ )

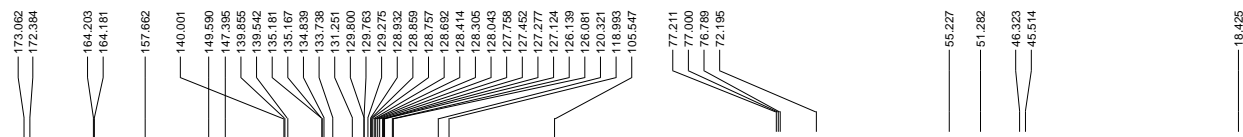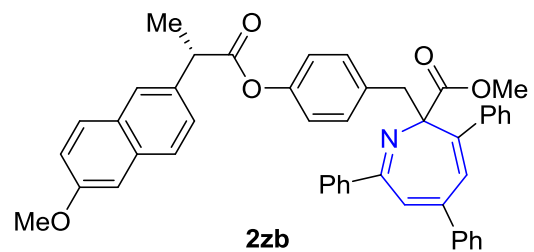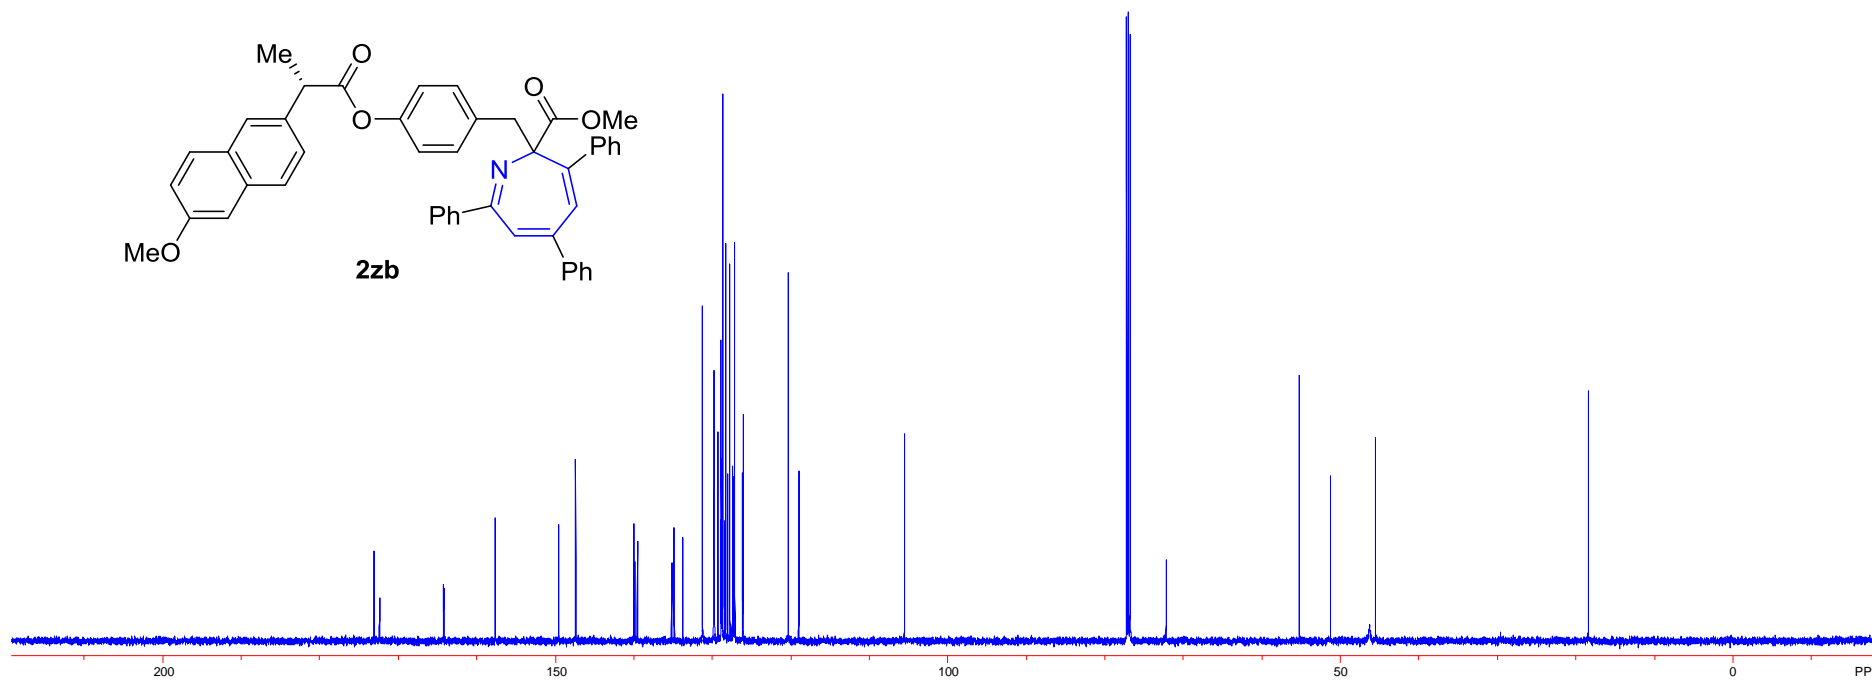

$^1\text{H}$  NMR(400 MHz,  $\text{CDCl}_3$ )

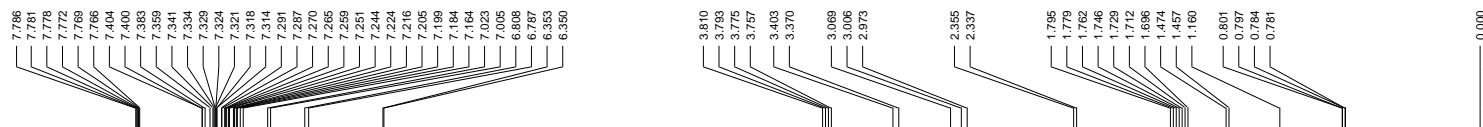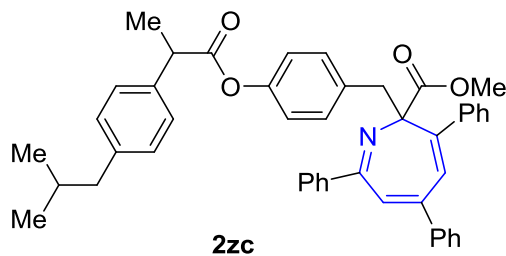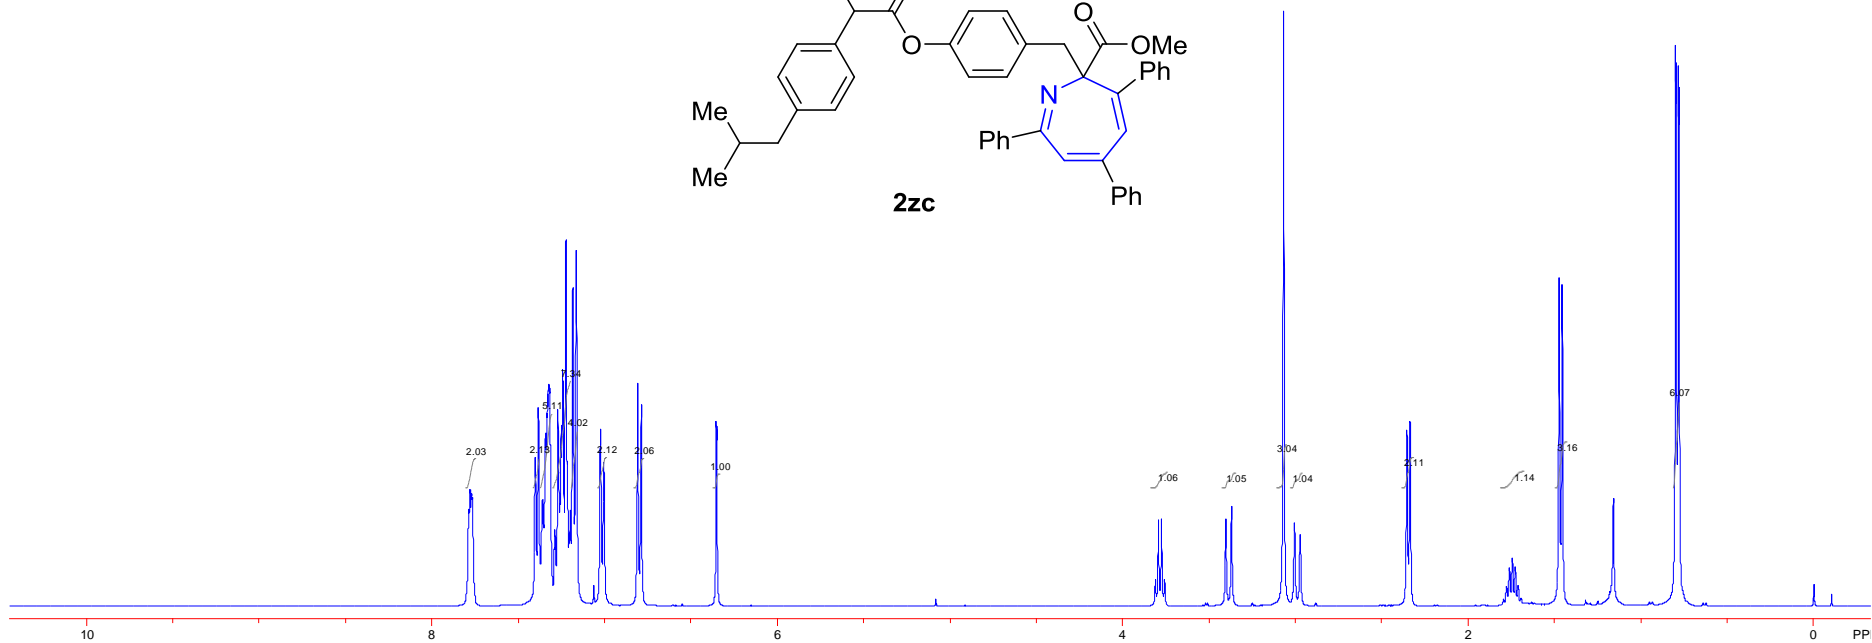

$^{13}\text{C}$  NMR (100 MHz,  $\text{CDCl}_3$ )

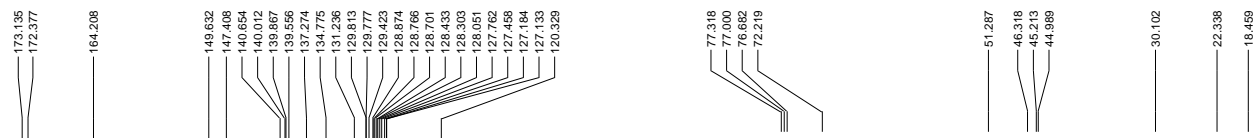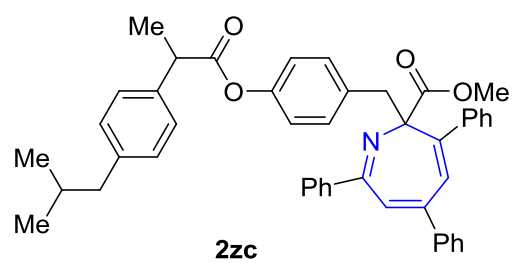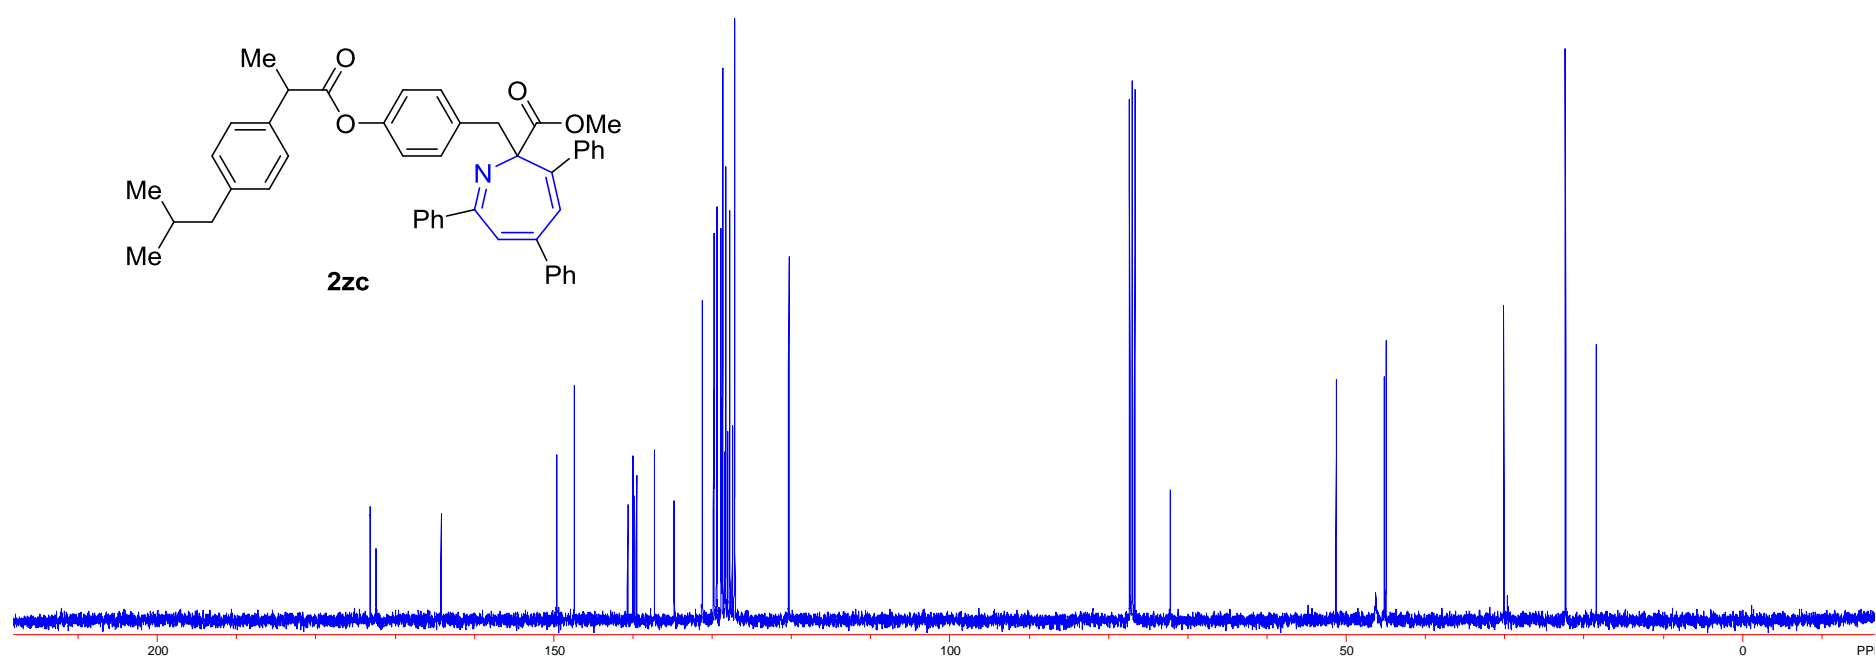



$^1\text{H}$  NMR(600 MHz,  $\text{CDCl}_3$ )

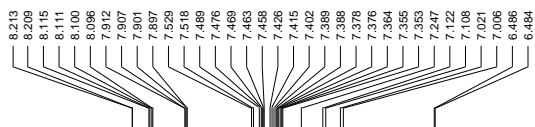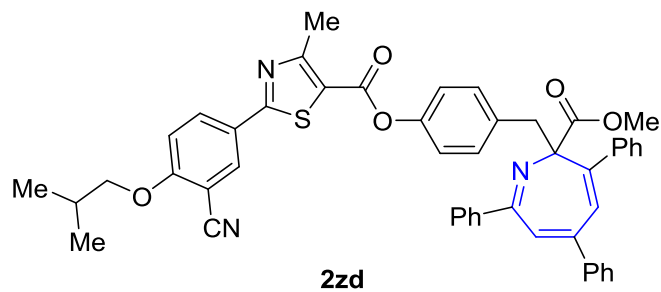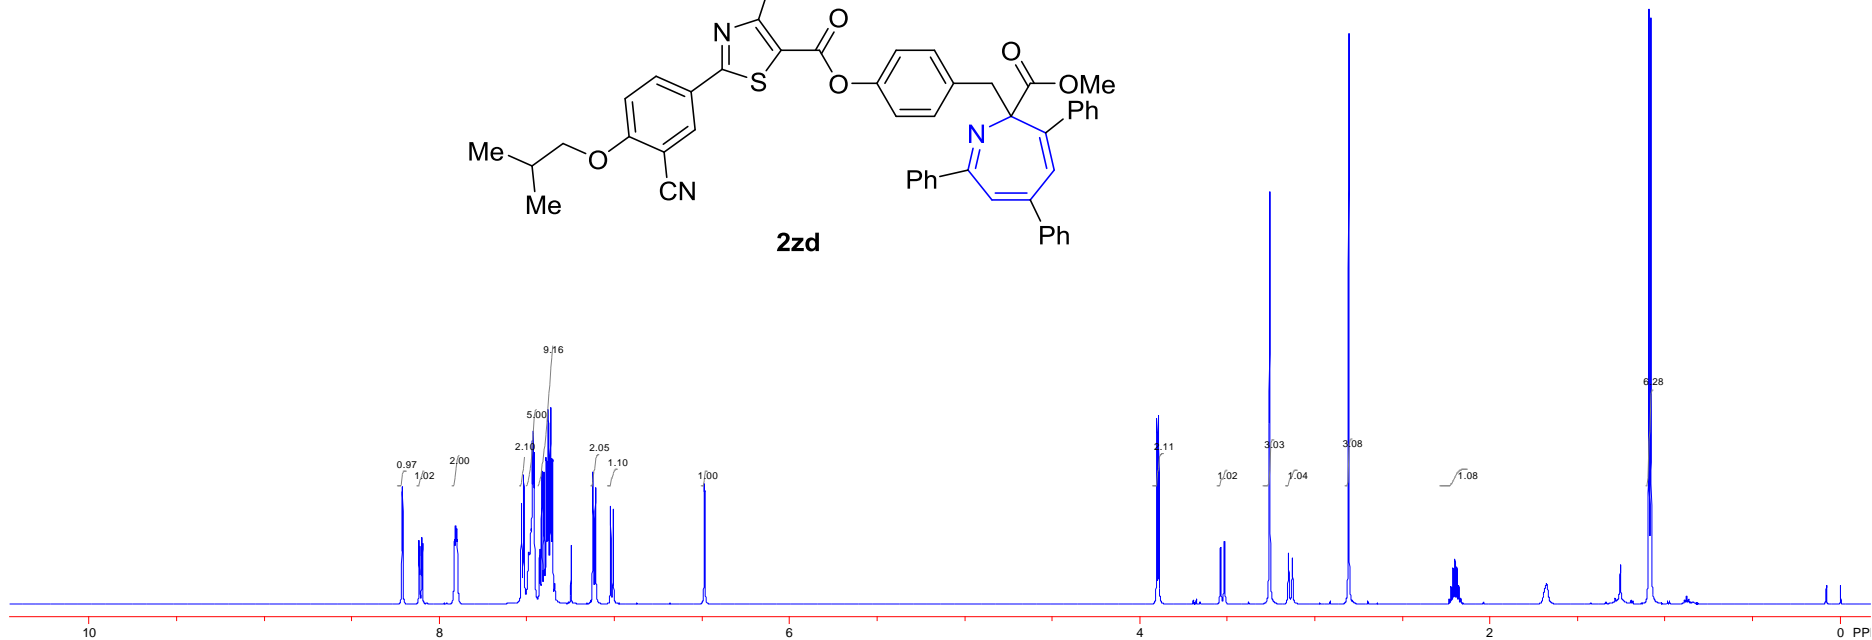

$^{13}\text{C}$  NMR (150 MHz,  $\text{CDCl}_3$ )

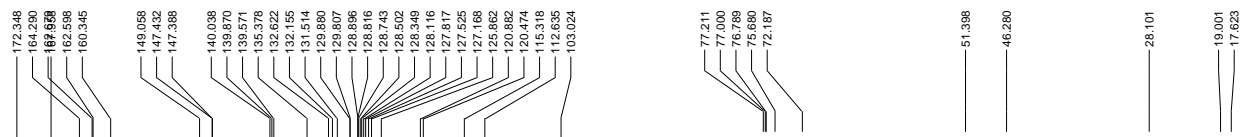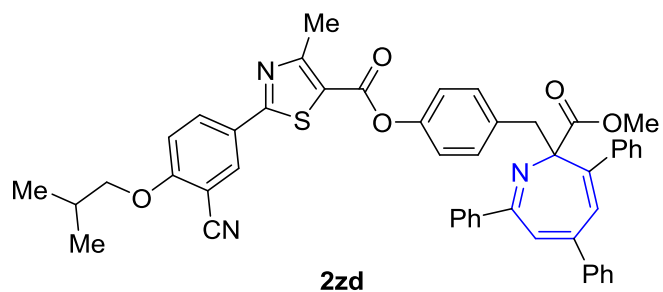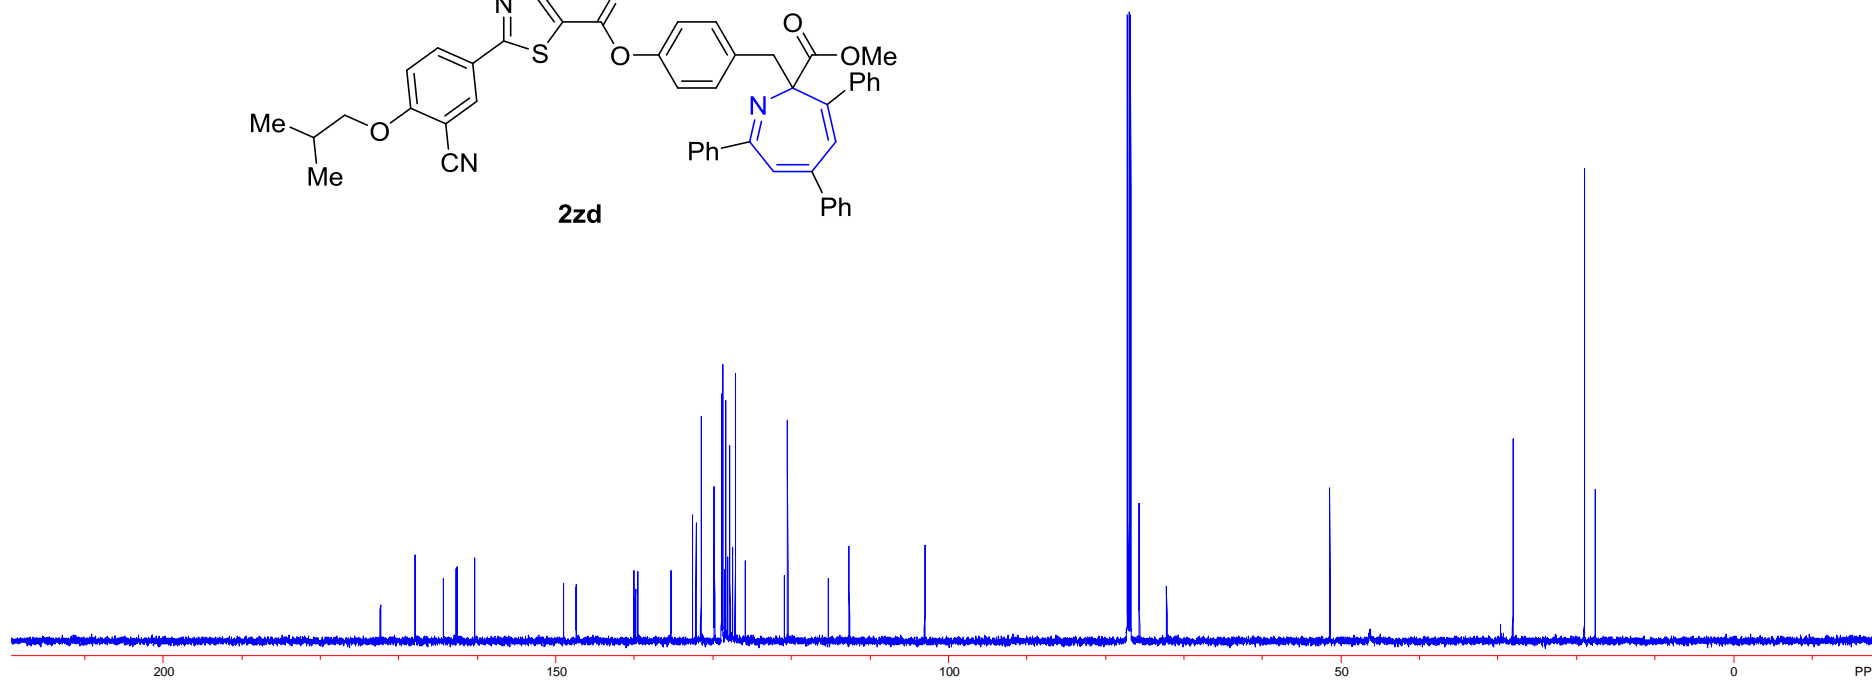

$^1\text{H}$  NMR(400 MHz,  $\text{CDCl}_3$ )

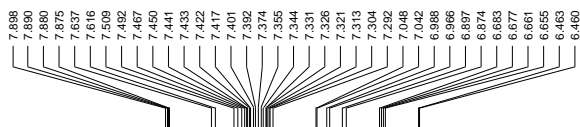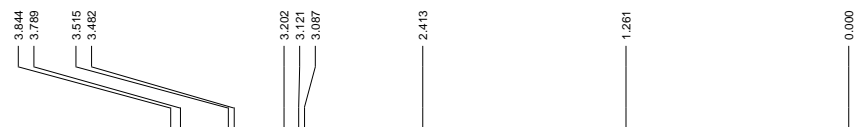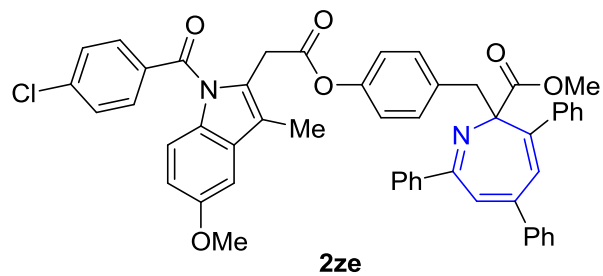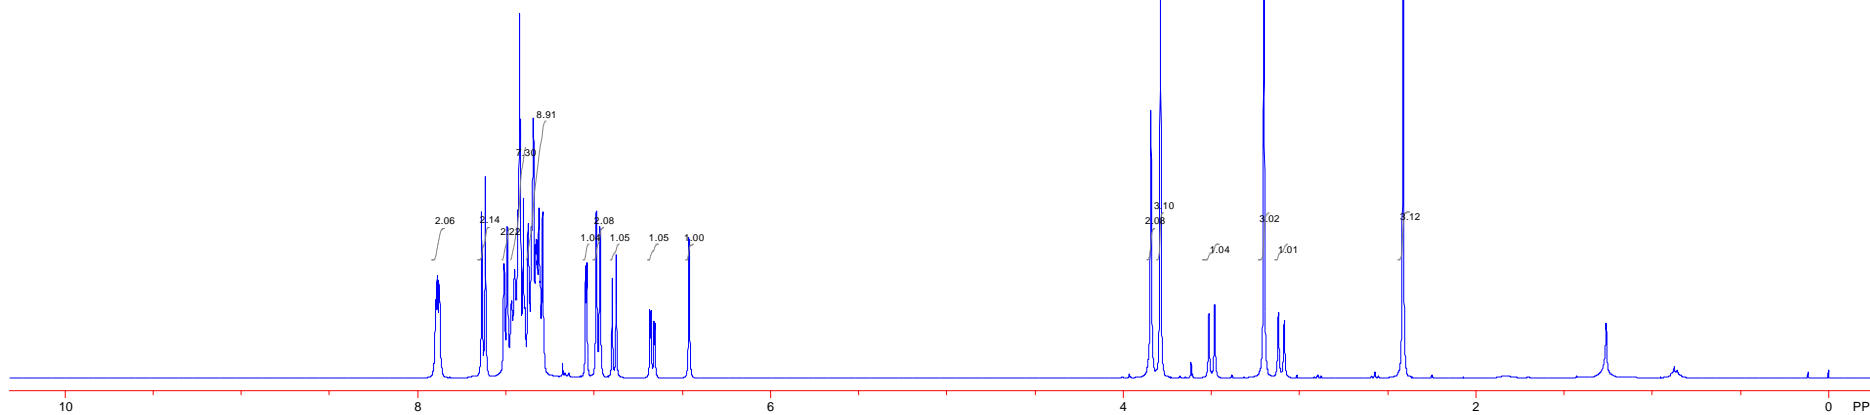

<sup>13</sup>C NMR (100 MHz, CDCl<sub>3</sub>)

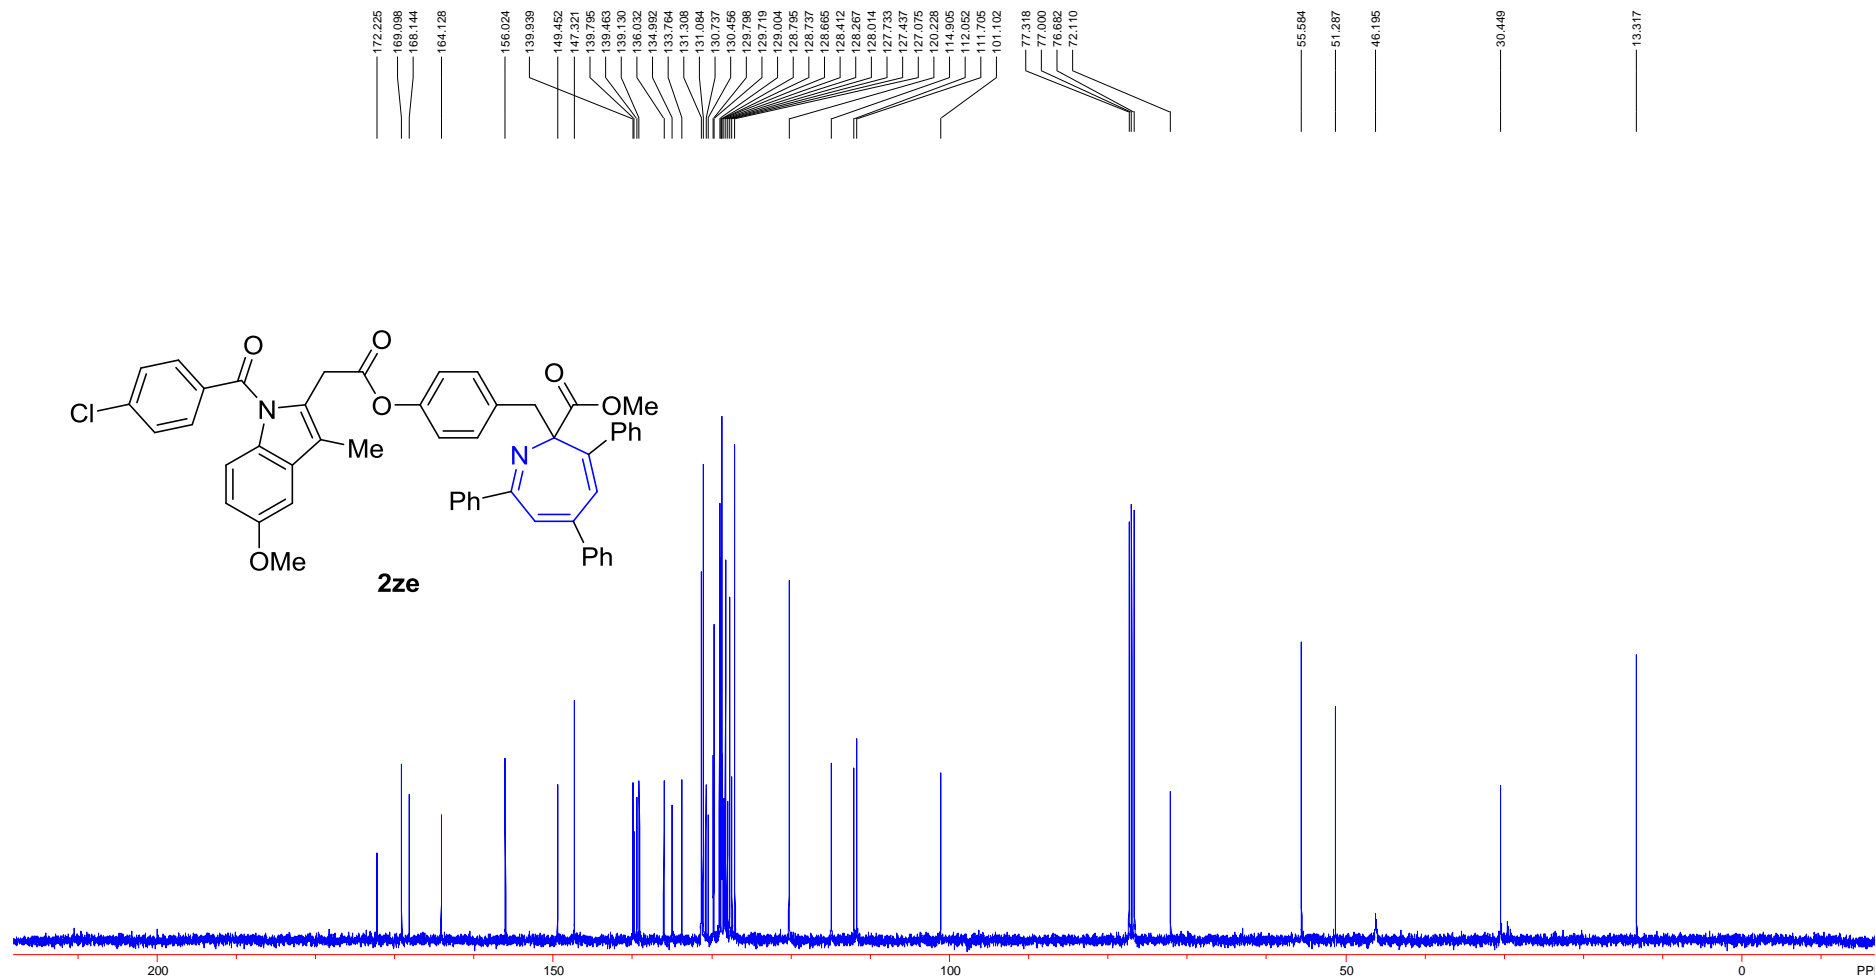

$^1\text{H}$  NMR(600 MHz,  $\text{CDCl}_3$ )

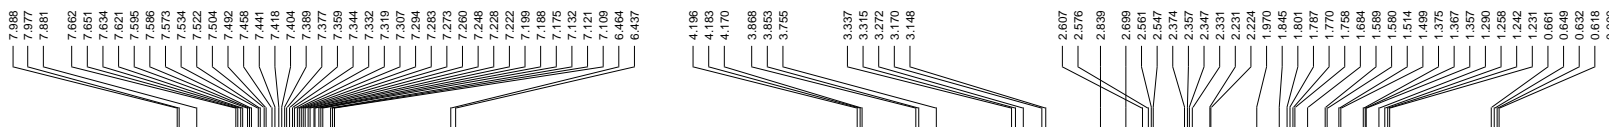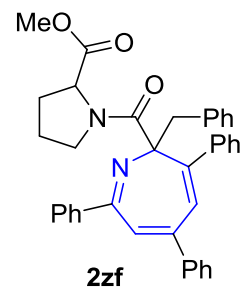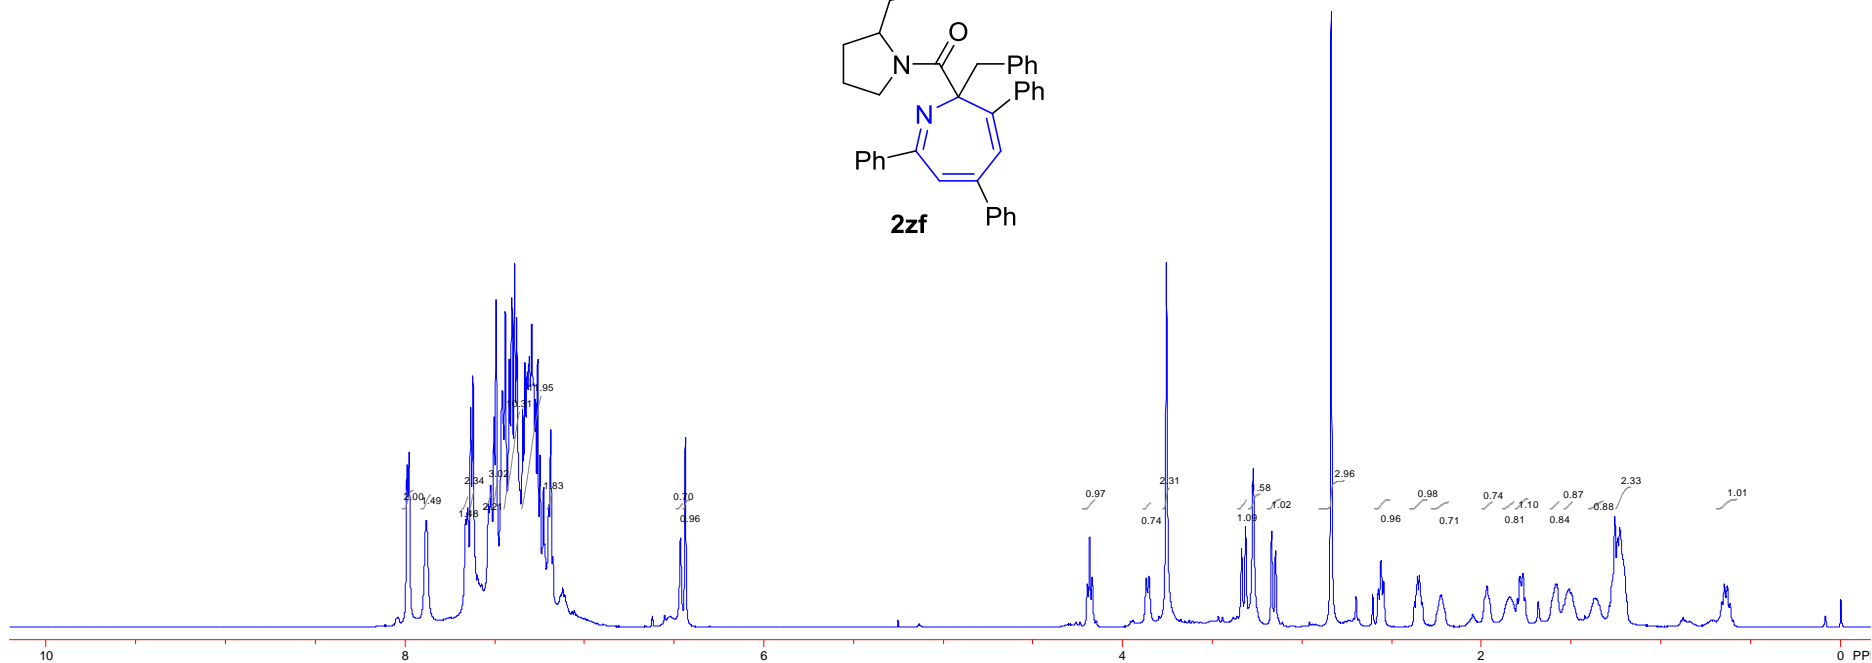

$^{13}\text{C}$  NMR (150 MHz,  $\text{CDCl}_3$ )

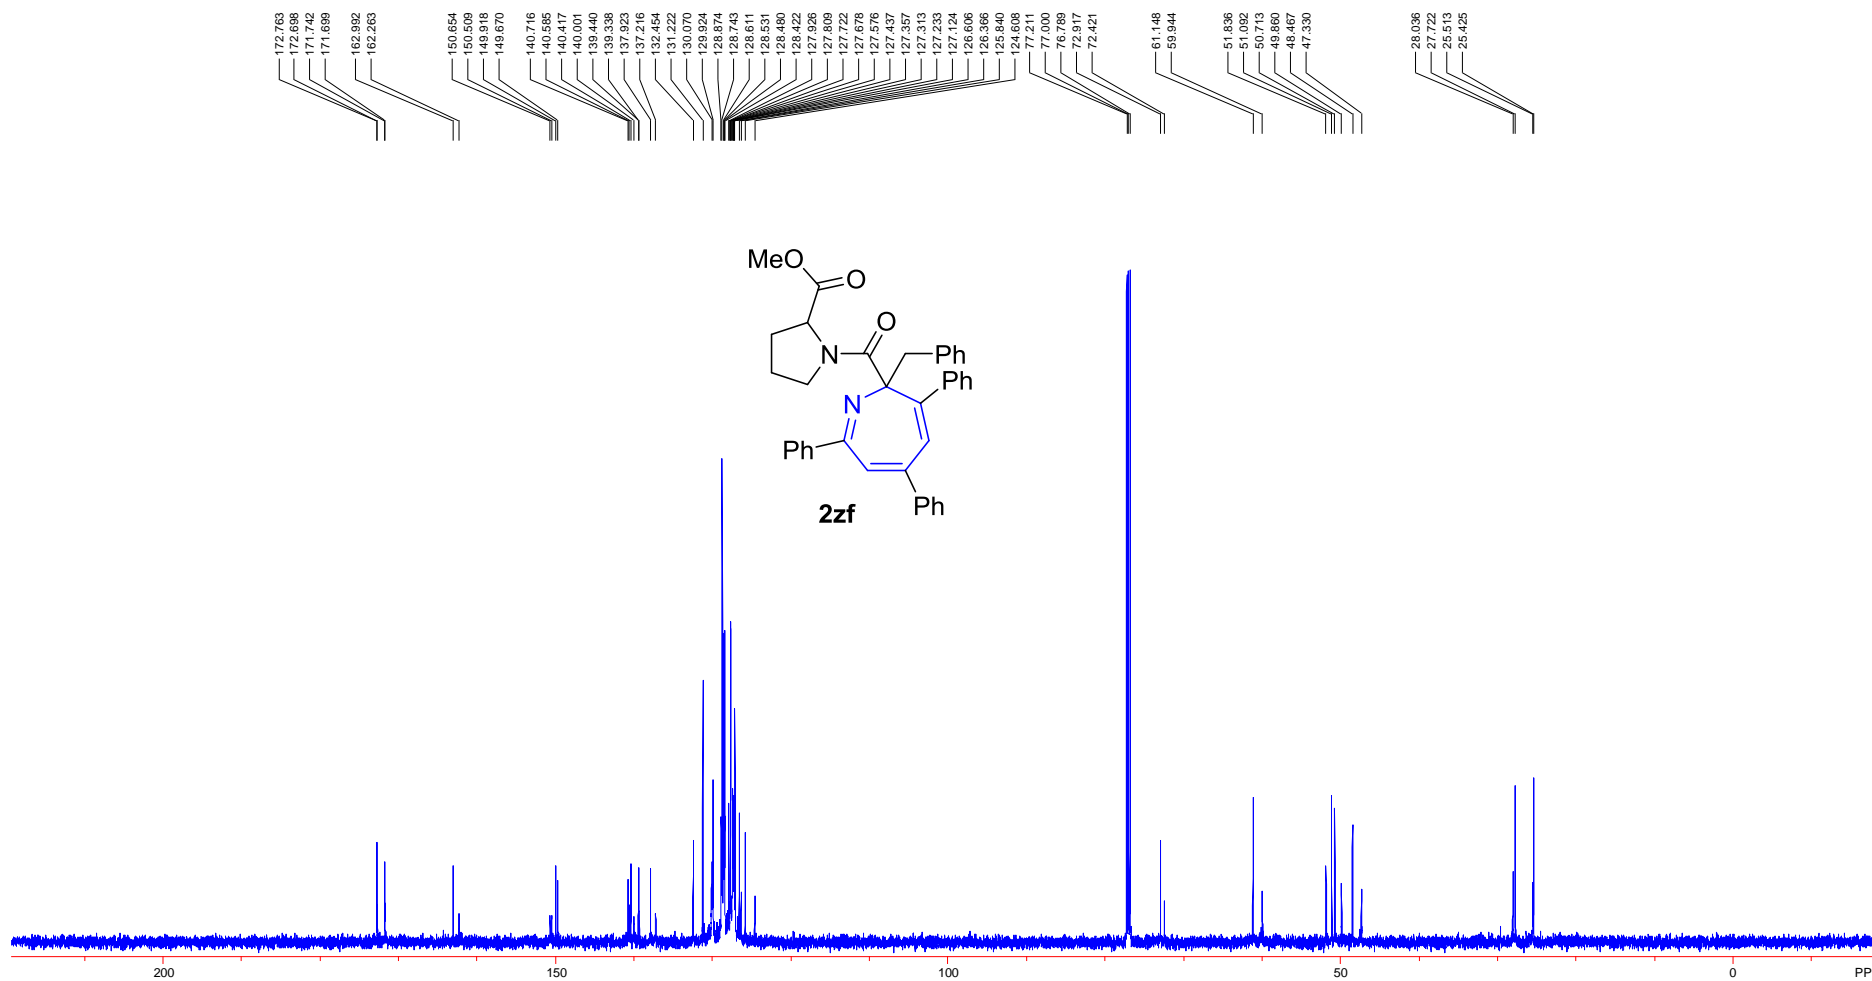

$^1\text{H}$  NMR(600 MHz,  $\text{CDCl}_3$ )

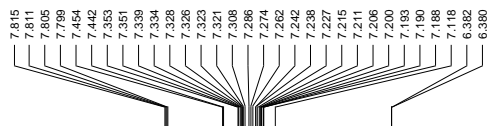

3.409

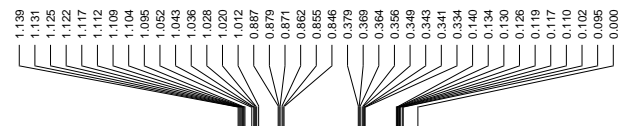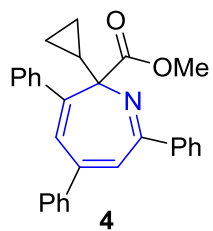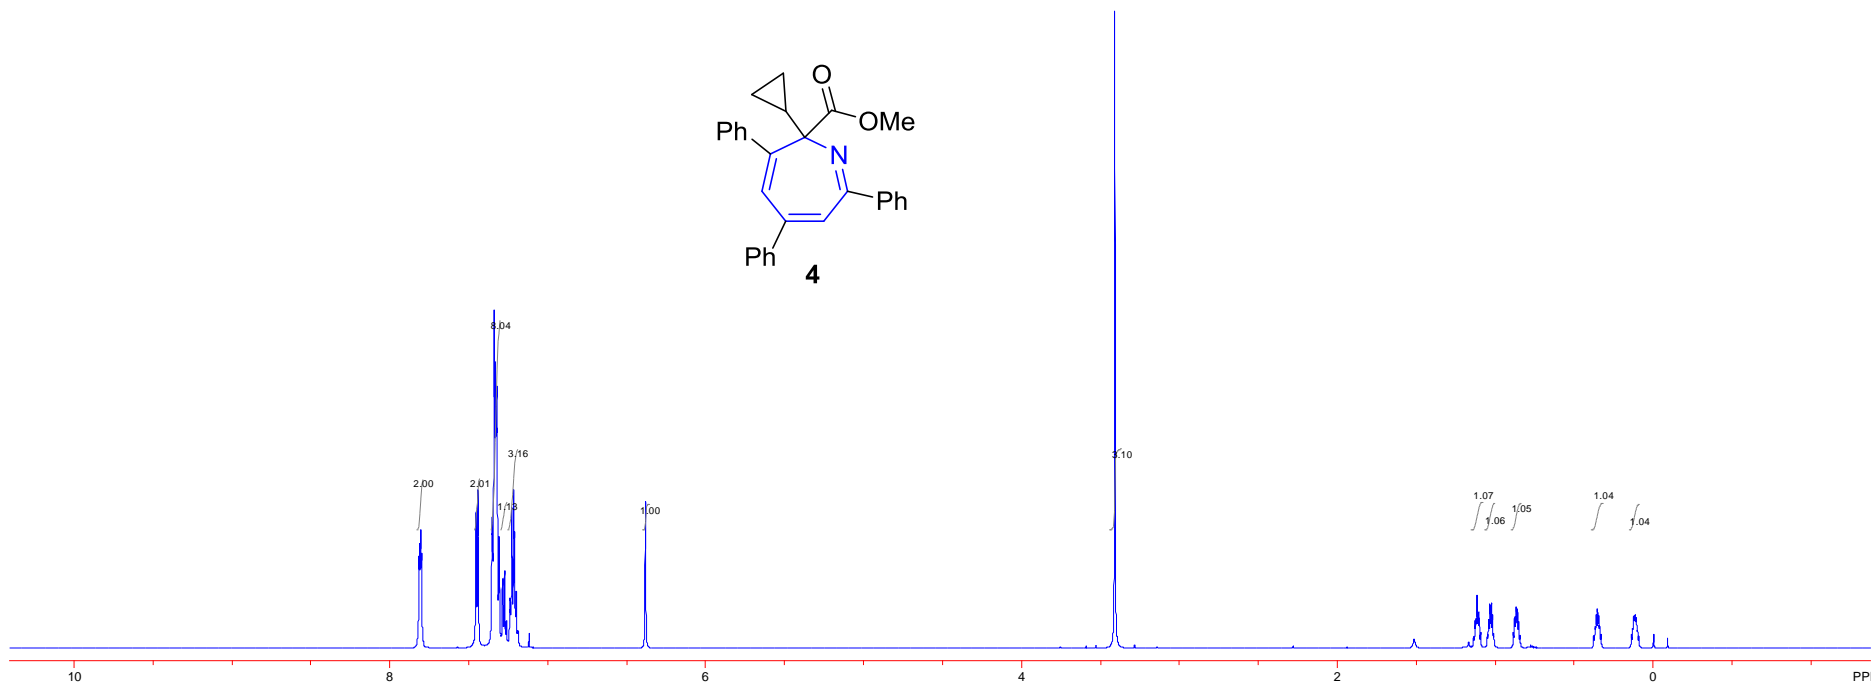

$^{13}\text{C}$  NMR (150 MHz,  $\text{CDCl}_3$ )

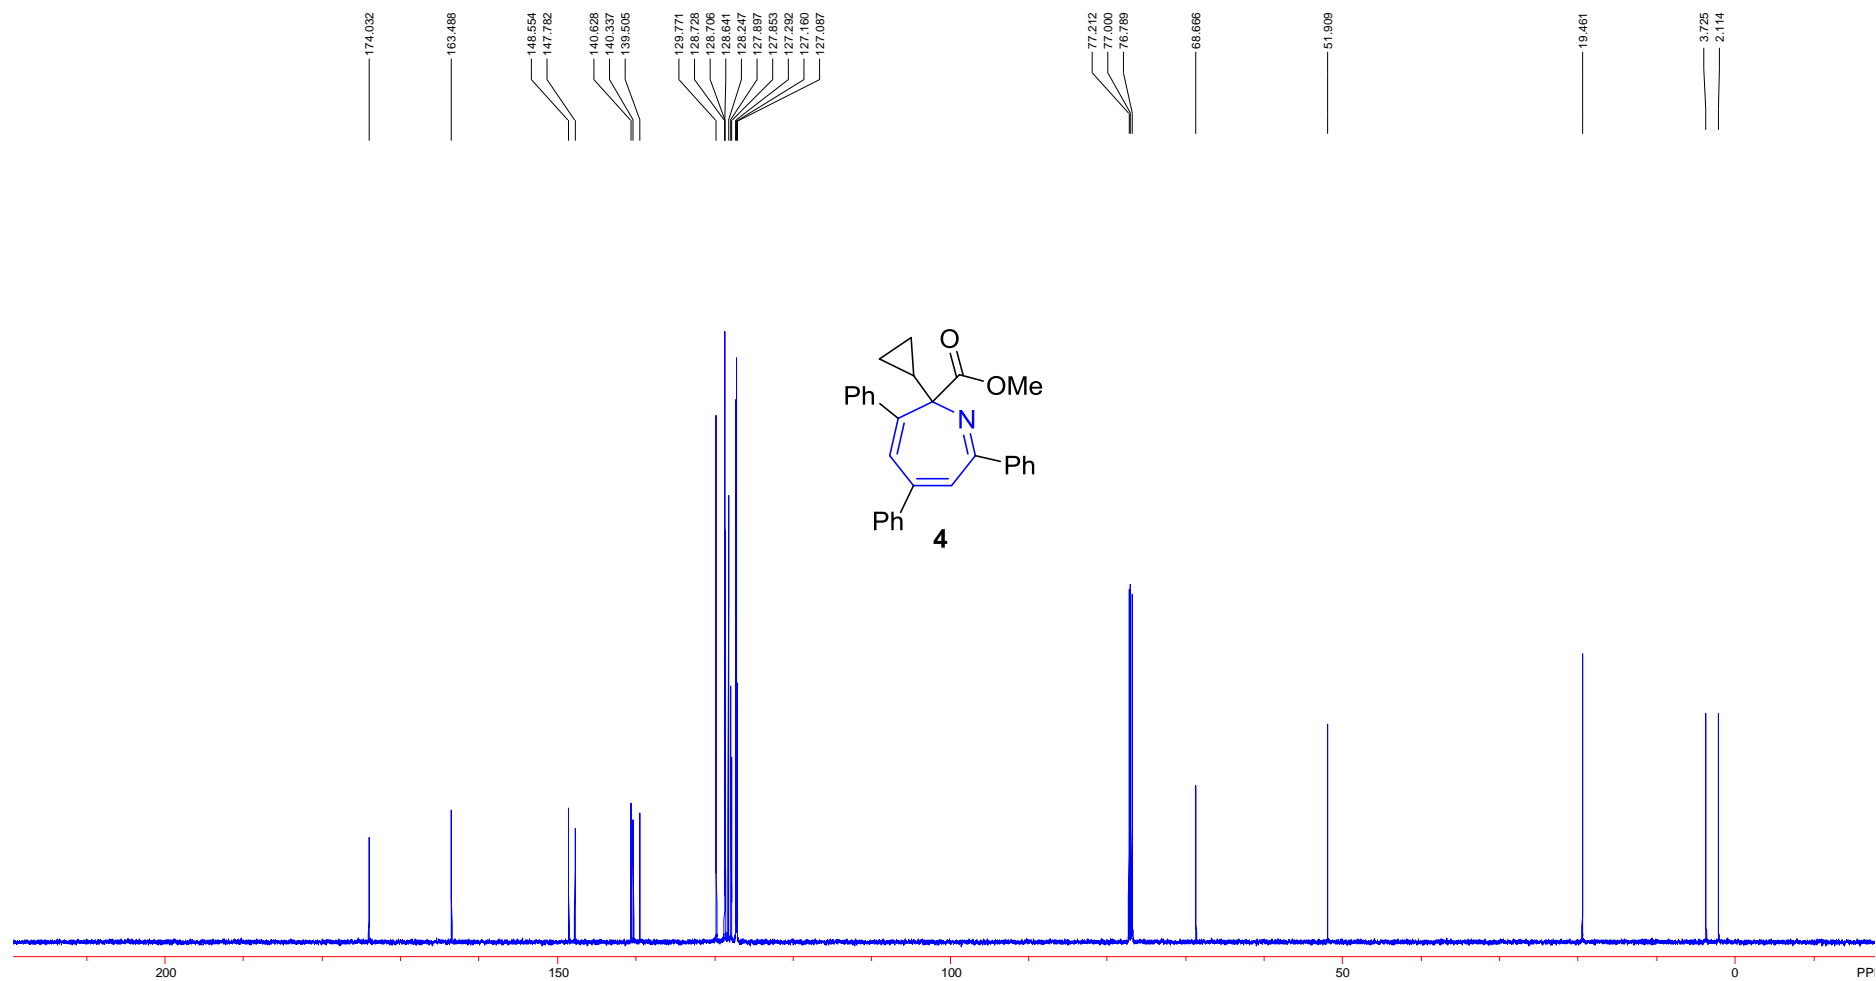

Supplement: d2qo01147f1.pdf [file d2qo01147f1.pdf]
